# Supplementary material
Source: publisher site journal article supplement (https://www.spandidos-publications.com/4736/downloadSupplementary)
Supplement: Supplementary file 1 [file downloadSupplementary]

## Sheet: Supplementary Table 2
Table SII. KEGG and GO terms for differentially expressed genes from TCGA.
ID	Description	GeneRatio	BgRatio	P-value	FDR	q-value	geneID	Size	Database	Enrichment ratio	Trend
hsa04640	Hematopoietic cell lineage	38/356	99/8009	1.82e-26	3.49e-24	2.66e-24	CSF3R, CD33, CD4, CD37, HLA-DMB, ITGAM, CD3D, CSF1R, CD2, CSF2RA, HLA-DMA, CD14, CD3E, CSF1, CD8B, FCGR1A, CD3G, CD38, HLA-DPB1, IL2RA, HLA-DRB1, CD5, HLA-DRA, HLA-DPA1, CD8A, CR1, HLA-DOA, HLA-DQA1, HLA-DRB5, HLA-DQB1, IL7R, CD7, HLA-DOB, ANPEP, IL6, CD1C, HLA-DQA2, CD55	38	pathway_KEGG	0.106742	Up
hsa04061	Viral protein interaction with cytokine and cytokine receptor	38/356	100/8009	2.82e-26	3.49e-24	2.66e-24	IL18, IL10RA, IL2RG, CSF1R, CXCR3, TNFRSF1B, CCL4, CSF1, CCR5, CCL5, CCR1, IL2RA, CCL3, CCL8, CCL4L2, XCL2, XCL1, CCR2, CCL23, CCR7, IL2RB, CCL3L1, CXCL9, TNFSF10, CXCL10, CXCL11, CCL13, CXCL13, CCL2, CCL19, CCL17, CXCL1, IL6, CCL18, CXCL12, CCL26, IL20RB, CXCL14	38	pathway_KEGG	0.106742	Up
hsa05150	Staphylococcus aureus infection	37/356	96/8009	7.25e-26	5.97e-24	4.55e-24	PTAFR, SELPLG, ITGB2, HLA-DMB, ITGAM, ITGAL, HLA-DMA, C1QA, C1QC, C1QB, C3AR1, FCGR1A, HLA-DPB1, HLA-DRB1, FPR1, HLA-DRA, HLA-DPA1, FPR3, FCGR3A, C3, FCGR2A, FCGR2B, HLA-DOA, HLA-DQA1, HLA-DRB5, CFD, C2, HLA-DQB1, C1S, C1R, HLA-DOB, C5AR1, ICAM1, CFB, HLA-DQA2, CFH, DEFB1	37	pathway_KEGG	0.103933	Up
hsa04060	Cytokine-cytokine receptor interaction	61/356	294/8009	2.44e-25	1.5e-23	1.15e-23	CSF2RB, IL18, IL10RA, CSF3R, IL12RB1, CD4, LTB, IL2RG, TNFSF13B, CSF1R, CSF2RA, CXCR3, TNFSF8, TNFRSF1B, IL16, CCL4, CSF1, CCR5, CCL5, CCR1, CXCR6, IL2RA, CD27, FASLG, CCL3, CCL8, CCL4L2, XCL2, XCL1, CCR2, CCL23, CXCL16, CCR7, IL2RB, IL32, CCL3L1, CXCL9, CD40, TNFSF10, CXCL10, CXCL11, CCL13, IL21R, TNFRSF18, IL15RA, IL7R, CXCL13, CCL2, CCL19, ACVRL1, CCL17, CXCL1, OSM, IL6, CCL18, CXCL12, CCL26, …	61	pathway_KEGG	0.171348	Up
hsa04514	Cell adhesion molecules (CAMs)	41/356	147/8009	2.51e-22	1.24e-20	9.44e-21	HLA-E, SELPLG, CD4, ITGB2, HLA-DMB, ITGAM, SIGLEC1, CD2, ITGAL, HLA-DMA, CD86, ICAM3, PTPRC, TIGIT, CD8B, VSIR, SELL, HLA-DPB1, HLA-DRB1, SPN, ICOS, HLA-DRA, HLA-B, HLA-DPA1, CD6, CD8A, HLA-C, CD28, HLA-DOA, PDCD1, CD40, HLA-DQA1, CTLA4, HLA-DRB5, HLA-DQB1, HLA-F, HLA-DOB, ICAM1, HLA-DQA2, PDCD1LG2, CADM3	41	pathway_KEGG	0.115169	Up
hsa05323	Rheumatoid arthritis	32/356	93/8009	1.01e-20	3.88e-19	2.96e-19	IL18, ITGB2, HLA-DMB, LTB, TNFSF13B, ITGAL, HLA-DMA, CD86, CSF1, TLR2, CCL5, HLA-DPB1, HLA-DRB1, HLA-DRA, CCL3, HLA-DPA1, CD28, HLA-DOA, CCL3L1, HLA-DQA1, CTLA4, HLA-DRB5, HLA-DQB1, CCL2, TLR4, HLA-DOB, CXCL1, ICAM1, IL6, HLA-DQA2, CXCL12, ACP5	32	pathway_KEGG	0.0898876	Up
hsa05330	Allograft rejection	22/356	38/8009	1.1e-20	3.88e-19	2.96e-19	HLA-E, HLA-DMB, HLA-DMA, CD86, PRF1, HLA-DPB1, HLA-DRB1, FASLG, HLA-DRA, HLA-B, HLA-DPA1, HLA-C, CD28, HLA-DOA, CD40, HLA-DQA1, HLA-DRB5, GZMB, HLA-DQB1, HLA-F, HLA-DOB, HLA-DQA2	22	pathway_KEGG	0.0617978	Up
hsa04145	Phagosome	39/356	152/8009	7.53e-20	2.32e-18	1.77e-18	NCF1, HLA-E, NCF4, CORO1A, CTSS, CYBA, ITGB2, HLA-DMB, ITGAM, CYBB, HLA-DMA, CD14, FCGR1A, CLEC7A, TLR2, HLA-DPB1, HLA-DRB1, HLA-DRA, NCF2, HLA-B, HLA-DPA1, MSR1, FCGR3A, C3, MRC1, HLA-C, FCGR2A, CD209, FCGR2B, HLA-DOA, HLA-DQA1, HLA-DRB5, HLA-DQB1, HLA-F, MARCO, C1R, TLR4, HLA-DOB, HLA-DQA2	39	pathway_KEGG	0.109551	Up
hsa05332	Graft-versus-host disease	22/356	41/8009	1.07e-19	2.94e-18	2.24e-18	HLA-E, HLA-DMB, HLA-DMA, CD86, PRF1, HLA-DPB1, HLA-DRB1, FASLG, HLA-DRA, HLA-B, HLA-DPA1, HLA-C, CD28, HLA-DOA, HLA-DQA1, HLA-DRB5, GZMB, HLA-DQB1, HLA-F, HLA-DOB, IL6, HLA-DQA2	22	pathway_KEGG	0.0617978	Up
hsa05416	Viral myocarditis	25/356	60/8009	8.6e-19	2.05e-17	1.57e-17	HLA-E, ITGB2, HLA-DMB, ITGAL, HLA-DMA, CD86, PRF1, RAC2, HLA-DPB1, HLA-DRB1, HLA-DRA, HLA-B, HLA-DPA1, HLA-C, CD28, HLA-DOA, CD40, HLA-DQA1, HLA-DRB5, HLA-DQB1, HLA-F, HLA-DOB, ICAM1, HLA-DQA2, CD55	25	pathway_KEGG	0.0702247	Up
hsa04062	Chemokine signaling pathway	42/356	189/8009	9.14e-19	2.05e-17	1.57e-17	NCF1, VAV1, PLCB2, WAS, PIK3R5, HCK, DOCK2, CXCR3, FGR, CCL4, CCR5, GNGT2, RAC2, CCL5, CCR1, CXCR6, CCL3, CCL8, CCL4L2, XCL2, XCL1, CCR2, LYN, CCL23, CXCL16, CCR7, PIK3CD, CCL3L1, CXCL9, CXCL10, CXCL11, JAK3, CCL13, CXCL13, CCL2, CCL19, CCL17, CXCL1, CCL18, CXCL12, CCL26, CXCL14	42	pathway_KEGG	0.117978	Up
hsa05140	Leishmaniasis	27/356	77/8009	6.79e-18	1.38e-16	1.06e-16	NCF1, PTPN6, NCF4, CYBA, ITGB2, HLA-DMB, ITGAM, CYBB, HLA-DMA, FCGR1A, TLR2, HLA-DPB1, HLA-DRB1, HLA-DRA, NCF2, HLA-DPA1, CR1, FCGR3A, C3, FCGR2A, HLA-DOA, HLA-DQA1, HLA-DRB5, HLA-DQB1, TLR4, HLA-DOB, HLA-DQA2	27	pathway_KEGG	0.0758427	Up
hsa05320	Autoimmune thyroid disease	23/356	53/8009	7.29e-18	1.38e-16	1.06e-16	HLA-E, HLA-DMB, HLA-DMA, CD86, PRF1, HLA-DPB1, HLA-DRB1, FASLG, HLA-DRA, HLA-B, HLA-DPA1, HLA-C, CD28, HLA-DOA, CD40, HLA-DQA1, CTLA4, HLA-DRB5, GZMB, HLA-DQB1, HLA-F, HLA-DOB, HLA-DQA2	23	pathway_KEGG	0.0646067	Up
hsa04940	Type I diabetes mellitus	21/356	43/8009	9.71e-18	1.71e-16	1.31e-16	HLA-E, HLA-DMB, HLA-DMA, CD86, PRF1, HLA-DPB1, HLA-DRB1, FASLG, HLA-DRA, HLA-B, HLA-DPA1, HLA-C, CD28, HLA-DOA, HLA-DQA1, HLA-DRB5, GZMB, HLA-DQB1, HLA-F, HLA-DOB, HLA-DQA2	21	pathway_KEGG	0.0589888	Up
hsa05152	Tuberculosis	39/356	180/8009	4.42e-17	7.28e-16	5.55e-16	IL18, IL10RA, CORO1A, CTSS, ITGB2, HLA-DMB, SYK, CARD9, ITGAM, HLA-DMA, CD14, FCER1G, FCGR1A, CLEC7A, CD74, TLR2, HLA-DPB1, HLA-DRB1, HLA-DRA, HLA-DPA1, CR1, FCGR3A, C3, MRC1, FCGR2A, CD209, FCGR2B, HLA-DOA, CLEC4E, HLA-DQA1, HLA-DRB5, LSP1, CIITA, HLA-DQB1, ITGAX, TLR4, HLA-DOB, IL6, HLA-DQA2	39	pathway_KEGG	0.109551	Up
hsa04610	Complement and coagulation cascades	26/356	85/8009	1.3e-15	2.01e-14	1.54e-14	ITGB2, ITGAM, C1QA, C1QC, C1QB, C3AR1, VSIG4, CR1, SERPINA1, C3, SERPING1, F13A1, CFD, C2, C1S, C1R, ITGAX, C5AR1, PLAU, PROCR, CFB, TFPI, CD55, PLAUR, CFH, SERPINE1	26	pathway_KEGG	0.0730337	Up
hsa04672	Intestinal immune network for IgA production	20/356	49/8009	4.66e-15	6.77e-14	5.16e-14	HLA-DMB, TNFSF13B, HLA-DMA, CD86, HLA-DPB1, HLA-DRB1, ICOS, HLA-DRA, HLA-DPA1, CD28, HLA-DOA, CD40, HLA-DQA1, HLA-DRB5, HLA-DQB1, IL15RA, HLA-DOB, IL6, HLA-DQA2, CXCL12	20	pathway_KEGG	0.0561798	Up
hsa04659	Th17 cell differentiation	28/356	107/8009	8.86e-15	1.22e-13	9.27e-14	IL12RB1, CD4, HLA-DMB, IL2RG, CD3D, LCK, CD247, HLA-DMA, CD3E, CD3G, ZAP70, HLA-DPB1, IL2RA, HLA-DRB1, HLA-DRA, TBX21, HLA-DPA1, IL2RB, HLA-DOA, FOXP3, HLA-DQA1, HLA-DRB5, JAK3, IL21R, HLA-DQB1, HLA-DOB, IL6, HLA-DQA2	28	pathway_KEGG	0.0786517	Up
hsa04658	Th1 and Th2 cell differentiation	26/356	92/8009	1.1e-14	1.43e-13	1.09e-13	STAT4, IL12RB1, CD4, HLA-DMB, IL2RG, CD3D, LCK, CD247, HLA-DMA, CD3E, CD3G, ZAP70, HLA-DPB1, IL2RA, HLA-DRB1, HLA-DRA, TBX21, HLA-DPA1, IL2RB, HLA-DOA, HLA-DQA1, HLA-DRB5, JAK3, HLA-DQB1, HLA-DOB, HLA-DQA2	26	pathway_KEGG	0.0730337	Up
hsa05321	Inflammatory bowel disease (IBD)	22/356	65/8009	1.99e-14	2.46e-13	1.88e-13	IL18, STAT4, IL12RB1, HLA-DMB, IL2RG, HLA-DMA, TLR2, HLA-DPB1, HLA-DRB1, HLA-DRA, TBX21, HLA-DPA1, HLA-DOA, FOXP3, HLA-DQA1, HLA-DRB5, IL21R, HLA-DQB1, TLR4, HLA-DOB, IL6, HLA-DQA2	22	pathway_KEGG	0.0617978	Up
hsa04612	Antigen processing and presentation	23/356	78/8009	1.45e-13	1.71e-12	1.3e-12	HLA-E, CTSS, CD4, HLA-DMB, HLA-DMA, CD8B, CD74, HLA-DPB1, HLA-DRB1, HLA-DRA, HLA-B, HLA-DPA1, CD8A, LGMN, HLA-C, HLA-DOA, HLA-DQA1, HLA-DRB5, CIITA, HLA-DQB1, HLA-F, HLA-DOB, HLA-DQA2	23	pathway_KEGG	0.0646067	Up
hsa05340	Primary immunodeficiency	16/356	38/8009	1.52e-12	1.7e-11	1.3e-11	BTK, CD4, IL2RG, CD3D, LCK, CD3E, PTPRC, CD8B, ZAP70, ICOS, CD8A, CD40, CIITA, JAK3, IL7R, CD79A	16	pathway_KEGG	0.0449438	Up
hsa04662	B cell receptor signaling pathway	22/356	82/8009	4.16e-12	4.47e-11	3.41e-11	PTPN6, VAV1, BTK, LILRB4, INPP5D, LILRB1, SYK, PIK3AP1, LILRB2, DAPP1, LILRB3, RAC2, CARD11, CD72, LYN, LILRB5, PIK3CD, FCGR2B, LILRA5, CD79A, IFITM1, CD79B	22	pathway_KEGG	0.0617978	Up
hsa04380	Osteoclast differentiation	27/356	128/8009	7.29e-12	7.5e-11	5.72e-11	NCF1, LCP2, NCF4, BTK, LILRB4, LILRB1, CYBA, SPI1, SYK, LILRB2, LCK, CSF1R, TYROBP, LILRB3, CSF1, FCGR1A, SIRPG, NCF2, FCGR3A, LILRB5, PIK3CD, FCGR2A, FCGR2B, LILRA5, OSCAR, TREM2, ACP5	27	pathway_KEGG	0.0758427	Up
hsa05310	Asthma	14/356	31/8009	1.22e-11	1.2e-10	9.18e-11	HLA-DMB, HLA-DMA, FCER1G, HLA-DPB1, HLA-DRB1, HLA-DRA, HLA-DPA1, HLA-DOA, CD40, HLA-DQA1, HLA-DRB5, HLA-DQB1, HLA-DOB, HLA-DQA2	14	pathway_KEGG	0.0393258	Up
hsa05164	Influenza A	30/356	170/8009	5.71e-11	5.42e-10	4.14e-10	IL18, HLA-DMB, HLA-DMA, NLRP3, CASP1, CCL5, HLA-DPB1, HLA-DRB1, FASLG, HLA-DRA, TLR7, PYCARD, HLA-DPA1, PIK3CD, HLA-DOA, TNFSF10, HLA-DQA1, HLA-DRB5, CXCL10, CIITA, HLA-DQB1, CCL2, TLR4, HLA-DOB, OAS1, ICAM1, IL6, HLA-DQA2, TPSAB1, TPSB2	30	pathway_KEGG	0.0842697	Up
hsa04650	Natural killer cell mediated cytotoxicity	26/356	131/8009	7.7e-11	7.04e-10	5.37e-10	PTPN6, VAV1, LCP2, HLA-E, ITGB2, SYK, LCK, CD247, ITGAL, HCST, TYROBP, CD48, FCER1G, SH2D1A, PRF1, ZAP70, RAC2, NCR3, FASLG, HLA-B, FCGR3A, PIK3CD, HLA-C, TNFSF10, GZMB, ICAM1	26	pathway_KEGG	0.0730337	Up
hsa05322	Systemic lupus erythematosus	26/356	133/8009	1.1e-10	9.69e-10	7.39e-10	HLA-DMB, HLA-DMA, C1QA, CD86, C1QC, C1QB, FCGR1A, HLA-DPB1, HLA-DRB1, HLA-DRA, HLA-DPA1, FCGR3A, C3, FCGR2A, CD28, HLA-DOA, CD40, HLA-DQA1, HLA-DRB5, C2, HLA-DQB1, C1S, C1R, HLA-DOB, HLA-DQA2, CTSG	26	pathway_KEGG	0.0730337	Up
hsa05169	Epstein-Barr virus infection	32/356	201/8009	2.07e-10	1.76e-09	1.34e-09	HLA-E, BTK, HLA-DMB, SYK, CD3D, CD247, ITGAL, HLA-DMA, CD3E, CD3G, TLR2, HLA-DPB1, HLA-DRB1, HLA-DRA, HLA-B, LYN, HLA-DPA1, PIK3CD, HLA-C, HLA-DOA, CD40, HLA-DQA1, HLA-DRB5, CXCL10, JAK3, HLA-DQB1, HLA-F, HLA-DOB, OAS1, ICAM1, IL6, HLA-DQA2	32	pathway_KEGG	0.0898876	Up
hsa05166	Human T-cell leukemia virus 1 infection	33/356	219/8009	4.71e-10	3.88e-09	2.96e-09	HLA-E, CD4, ITGB2, SPI1, HLA-DMB, IL2RG, CD3D, LCK, ITGAL, HLA-DMA, CD3E, CD3G, HLA-DPB1, IL2RA, HLA-DRB1, HLA-DRA, HLA-B, HLA-DPA1, IL2RB, PIK3CD, HLA-C, HLA-DOA, CD40, HLA-DQA1, HLA-DRB5, JAK3, HLA-DQB1, IL15RA, HLA-F, HLA-DOB, ICAM1, IL6, HLA-DQA2	33	pathway_KEGG	0.0926966	Up
hsa05133	Pertussis	18/356	76/8009	3.53e-09	2.82e-08	2.15e-08	IRF8, ITGB2, ITGAM, NLRP3, C1QA, CD14, C1QC, C1QB, CASP1, PYCARD, C3, SERPING1, C2, C1S, IRF1, C1R, TLR4, IL6	18	pathway_KEGG	0.0505618	Up
hsa04064	NF-kappa B signaling pathway	20/356	102/8009	1.57e-08	1.17e-07	8.94e-08	BTK, LTB, SYK, LCK, TNFSF13B, CD14, CCL4, ZAP70, CARD11, CCL4L2, LYN, CD40, CCL13, TLR4, CCL19, BCL2A1, PLAU, CXCL1, ICAM1, CXCL12	20	pathway_KEGG	0.0561798	Up
hsa05142	Chagas disease (American trypanosomiasis)	20/356	102/8009	1.57e-08	1.17e-07	8.94e-08	PLCB2, GNA15, CD3D, CD247, C1QA, C1QC, CD3E, C1QB, CD3G, TLR2, CCL5, FASLG, CCL3, C3, PIK3CD, CCL3L1, CCL2, TLR4, IL6, SERPINE1	20	pathway_KEGG	0.0561798	Up
hsa04660	T cell receptor signaling pathway	20/356	104/8009	2.22e-08	1.61e-07	1.23e-07	PTPN6, VAV1, LCP2, CD4, CD3D, LCK, CD247, CD3E, PTPRC, CD8B, CD3G, ZAP70, CARD11, ICOS, CD8A, PIK3CD, CD28, PDCD1, MAP3K8, CTLA4	20	pathway_KEGG	0.0561798	Up
hsa05145	Toxoplasmosis	20/356	112/8009	8.16e-08	5.76e-07	4.4e-07	PIK3R5, IL10RA, HLA-DMB, ALOX5, HLA-DMA, CCR5, TLR2, HLA-DPB1, HLA-DRB1, HLA-DRA, HLA-DPA1, HLA-DOA, CD40, HLA-DQA1, HLA-DRB5, CIITA, HLA-DQB1, TLR4, HLA-DOB, HLA-DQA2	20	pathway_KEGG	0.0561798	Up
hsa04620	Toll-like receptor signaling pathway	19/356	104/8009	1.19e-07	8.15e-07	6.22e-07	TLR8, CD86, CD14, CCL4, TLR2, CCL5, IRF5, CCL3, CCL4L2, TLR7, PIK3CD, CCL3L1, CXCL9, CD40, MAP3K8, CXCL10, CXCL11, TLR4, IL6	19	pathway_KEGG	0.0533708	Up
hsa05144	Malaria	12/356	50/8009	1.3e-06	8.68e-06	6.62e-06	IL18, ITGB2, ITGAL, TLR2, KLRB1, CR1, CD40, CCL2, TLR4, ICAM1, ACKR1, IL6	12	pathway_KEGG	0.0337079	Up
hsa05134	Legionellosis	12/356	57/8009	5.72e-06	3.72e-05	2.83e-05	IL18, ITGB2, ITGAM, CD14, CASP1, TLR2, PYCARD, CR1, C3, TLR4, CXCL1, IL6	12	pathway_KEGG	0.0337079	Up
hsa05235	PD-L1 expression and PD-1 checkpoint pathway in cancer	15/356	89/8009	7.37e-06	4.66e-05	3.56e-05	PTPN6, BATF, CD4, CD3D, LCK, CD247, CD3E, CD3G, ZAP70, TLR2, PIK3CD, CD28, PDCD1, BATF2, TLR4	15	pathway_KEGG	0.0421348	Up
hsa04666	Fc gamma R-mediated phagocytosis	15/356	93/8009	1.28e-05	7.92e-05	6.04e-05	NCF1, VAV1, WAS, HCK, INPP5D, SYK, DOCK2, PTPRC, FCGR1A, RAC2, LYN, FCGR3A, PIK3CD, FCGR2A, FCGR2B	15	pathway_KEGG	0.0421348	Up
hsa04670	Leukocyte transendothelial migration	16/356	112/8009	3.18e-05	0.000192	0.000146	NCF1, VAV1, NCF4, CYBA, ITGB2, ITGAM, CYBB, ITGAL, RHOH, RAC2, NCF2, PIK3CD, ICAM1, CXCL12, MMP2, MMP9	16	pathway_KEGG	0.0449438	Up
hsa05162	Measles	18/356	138/8009	3.63e-05	0.000213	0.000163	IL2RG, CD3D, CD3E, CD3G, SLAMF1, TLR2, IL2RA, FASLG, TLR7, IL2RB, PIK3CD, CD209, CD28, FCGR2B, JAK3, TLR4, OAS1, IL6	18	pathway_KEGG	0.0505618	Up
hsa04621	NOD-like receptor signaling pathway	21/356	181/8009	4.93e-05	0.000283	0.000216	RIPK3, PLCB2, IL18, CYBA, TRPM2, CARD9, PSTPIP1, CYBB, NLRP3, CASP4, CASP1, CCL5, PYCARD, GBP5, GBP4, CCL2, TLR4, CXCL1, OAS1, IL6, AIM2	21	pathway_KEGG	0.0589888	Up
hsa04630	JAK-STAT signaling pathway	19/356	162/8009	9.72e-05	0.000545	0.000416	PTPN6, CSF2RB, IL10RA, STAT4, CSF3R, IL12RB1, IL2RG, CSF2RA, IL2RA, IL2RB, PIK3CD, JAK3, IL21R, IL15RA, IL7R, OSM, IL6, IL20RB, AOX1	19	pathway_KEGG	0.0533708	Up
hsa04664	Fc epsilon RI signaling pathway	11/356	68/8009	0.00018	0.000986	0.000752	VAV1, LCP2, BTK, INPP5D, SYK, ALOX5, FCER1G, RAC2, ALOX5AP, LYN, PIK3CD	11	pathway_KEGG	0.0308989	Up
hsa04625	C-type lectin receptor signaling pathway	14/356	104/8009	0.00019	0.00102	0.000777	SYK, CARD9, NLRP3, FCER1G, CASP1, CLEC7A, PYCARD, PIK3CD, CD209, CLEC4E, LSP1, IRF1, CCL17, IL6	14	pathway_KEGG	0.0393258	Up
hsa05135	Yersinia infection	15/356	120/8009	0.00026	0.00137	0.00104	VAV1, LCP2, IL18, WAS, FYB1, LCK, NLRP3, CASP1, ZAP70, RAC2, PYCARD, PIK3CD, CCL2, TLR4, IL6	15	pathway_KEGG	0.0421348	Up
hsa04623	Cytosolic DNA-sensing pathway	10/356	63/8009	0.000413	0.00209	0.0016	RIPK3, IL18, CCL4, CASP1, CCL5, CCL4L2, PYCARD, CXCL10, IL6, AIM2	10	pathway_KEGG	0.0280899	Up
hsa04668	TNF signaling pathway	14/356	112/8009	0.000415	0.00209	0.0016	RIPK3, TNFRSF1B, CSF1, CCL5, PIK3CD, MAP3K8, CXCL10, IRF1, CCL2, CXCL1, ICAM1, IL6, VEGFD, MMP9	14	pathway_KEGG	0.0393258	Up
hsa05143	African trypanosomiasis	7/356	37/8009	0.00105	0.00518	0.00395	PLCB2, IL18, FASLG, APOL1, IDO1, ICAM1, IL6	7	pathway_KEGG	0.0196629	Up
hsa05167	Kaposi sarcoma-associated herpesvirus infection	18/356	186/8009	0.00152	0.00734	0.0056	PIK3R5, HLA-E, HCK, SYK, CD86, CCR5, GNGT2, CD200R1, CCR1, HLA-B, LYN, C3, PIK3CD, HLA-C, HLA-F, CXCL1, ICAM1, IL6	18	pathway_KEGG	0.0505618	Up
hsa05130	Pathogenic Escherichia coli infection	19/356	202/8009	0.00158	0.00752	0.00573	PTPN6, MYO1F, IL18, CYTH4, HCK, HCLS1, NLRP3, MYO1G, CASP4, CASP1, FASLG, NCKAP1L, PYCARD, LPAR5, LYN, FCGR2A, TNFSF10, TLR4, IL6	19	pathway_KEGG	0.0533708	Up
hsa05146	Amoebiasis	12/356	102/8009	0.0018	0.00841	0.00642	PLCB2, ITGB2, GNA15, ITGAM, CD14, TLR2, PIK3CD, TLR4, CXCL1, IL6, CD1C, CTSG	12	pathway_KEGG	0.0337079	Up
hsa05163	Human cytomegalovirus infection	20/356	225/8009	0.00237	0.0109	0.00828	PLCB2, IL10RA, HLA-E, CCL4, CCR5, GNGT2, RAC2, CCL5, CCR1, FASLG, CCL3, CCL4L2, HLA-B, PIK3CD, HLA-C, CCL3L1, HLA-F, CCL2, IL6, CXCL12	20	pathway_KEGG	0.0561798	Up
hsa05170	Human immunodeficiency virus 1 infection	19/356	212/8009	0.00276	0.0124	0.00945	HLA-E, CD4, CD3D, CD247, TNFRSF1B, CD3E, CCR5, CD3G, GNGT2, RAC2, TLR2, APOBEC3H, FASLG, HLA-B, PIK3CD, HLA-C, HLA-F, TLR4, BST2	19	pathway_KEGG	0.0533708	Up
hsa04611	Platelet activation	13/356	124/8009	0.00334	0.0147	0.0112	VAMP8, LCP2, PLCB2, PIK3R5, FERMT3, BTK, SYK, TBXAS1, APBB1IP, FCER1G, LYN, PIK3CD, FCGR2A	13	pathway_KEGG	0.0365169	Up
hsa00590	Arachidonic acid metabolism	8/356	63/8009	0.00643	0.0279	0.0213	TBXAS1, ALOX5, PLA2G2D, GGT5, HPGDS, PLA2G2A, PTGES, PLA2G5	8	pathway_KEGG	0.0224719	Up
hsa05020	Prion diseases	5/356	35/8009	0.0183	0.0771	0.0588	C1QA, C1QC, C1QB, CCL5, IL6	5	pathway_KEGG	0.0140449	Up
hsa05202	Transcriptional misregulation in cancer	15/356	186/8009	0.0184	0.0771	0.0588	SPI1, ITGAM, CSF1R, CD86, CD14, FCGR1A, LYL1, IL2RB, CD40, GZMB, ETV7, BCL2A1, PLAU, IL6, MMP9	15	pathway_KEGG	0.0421348	Up
hsa05205	Proteoglycans in cancer	16/356	204/8009	0.0193	0.0795	0.0606	PTPN6, VAV1, HCLS1, TLR2, FASLG, PIK3CD, TLR4, PLAU, DCN, PLAUR, LUM, WNT2, WNT10B, MMP2, TWIST2, MMP9	16	pathway_KEGG	0.0449438	Up
hsa00350	Tyrosine metabolism	5/356	36/8009	0.0205	0.0829	0.0632	IL4I1, ADH1B, AOX1, ADH1C, ALDH1A3	5	pathway_KEGG	0.0140449	Up
hsa04015	Rap1 signaling pathway	16/356	210/8009	0.0246	0.098	0.0748	VAV1, LCP2, PLCB2, FYB1, ITGB2, ITGAM, SKAP1, CSF1R, ITGAL, APBB1IP, CSF1, RAC2, FPR1, LPAR5, PIK3CD, VEGFD	16	pathway_KEGG	0.0449438	Up
hsa05221	Acute myeloid leukemia	7/356	67/8009	0.0285	0.111	0.0845	SPI1, ITGAM, CSF1R, CD14, FCGR1A, PIK3CD, BCL2A1	7	pathway_KEGG	0.0196629	Up
hsa05132	Salmonella infection	16/356	214/8009	0.0287	0.111	0.0845	RIPK3, IL18, CYTH4, NLRP3, CD14, CASP4, PTPRC, CASP1, RHOH, TLR2, NCKAP1L, PYCARD, TNFSF10, TLR4, IL6, S100A10	16	pathway_KEGG	0.0449438	Up
hsa04933	AGE-RAGE signaling pathway in diabetic complications	9/356	100/8009	0.0333	0.127	0.0965	PLCB2, CYBB, PIK3CD, CCL2, ICAM1, IL6, SERPINE1, MMP2, VEGFD	9	pathway_KEGG	0.0252809	Up
hsa04210	Apoptosis	11/356	136/8009	0.0394	0.147	0.112	CSF2RB, CTSS, PRF1, CTSW, CTSC, FASLG, CTSZ, PIK3CD, TNFSF10, GZMB, BCL2A1	11	pathway_KEGG	0.0308989	Up
hsa05168	Herpes simplex virus 1 infection	30/356	491/8009	0.0461	0.17	0.129	HLA-E, HLA-DMB, SYK, CARD9, PILRA, HLA-DMA, CD74, TLR2, CCL5, HLA-DPB1, CFP, HLA-DRB1, FASLG, HLA-DRA, HLA-B, HLA-DPA1, C3, PIK3CD, HLA-C, HLA-DOA, HLA-DQA1, HLA-DRB5, HLA-DQB1, HLA-F, CCL2, HLA-DOB, OAS1, BST2, IL6, HLA-DQA2	30	pathway_KEGG	0.0842697	Up
hsa04142	Lysosome	10/356	123/8009	0.0467	0.17	0.129	CTSS, LAPTM5, CTSW, CTSC, FUCA1, CTSZ, LGMN, CD68, CTSG, ACP5	10	pathway_KEGG	0.0280899	Up
GO:0042110	T cell activation	115/572	483/18866	1.04e-70	4.09e-67	2.97e-67	RIPK3, PTPN6, VAV1, SASH3, IL18, WAS, RASAL3, HLA-E, BATF, TNFAIP8L2, CORO1A, LILRB4, IL12RB1, JAML, LILRB1, LGALS9, CD4, AIF1, PSMB10, HLA-DMB, SYK, DOCK2, LILRB2, CD3D, LCK, TNFSF13B, CD2, ITGAL, NLRP3, SLAMF6, CD86, TNFSF8, TNFRSF1B, HAVCR2, CD3E, APBB1IP, SLA2, CD300A, FCER1G, DOCK8, PTPRC, TIGIT, CD8B, CD3G, SIRPG, RHOH, ZAP70, VSIR, CLEC4A, RAC2, CLEC7A, CARD11, CD74, CCL5, HLA-DPB1, VNN1, …	115	geneontology_Biological_Process	0.201049	Up
GO:0007159	leukocyte cell-cell adhesion	95/572	364/18866	5.1e-62	9.99e-59	7.25e-59	PTPN6, VAV1, SASH3, PTAFR, IL18, RASAL3, HLA-E, FERMT3, TNFAIP8L2, SELPLG, CORO1A, LILRB4, IL12RB1, LILRB1, LGALS9, CD4, ITGB2, AIF1, HLA-DMB, SYK, LILRB2, LCK, SKAP1, TNFSF13B, ALOX5, ITGAL, NLRP3, CD86, HAVCR2, CD3E, CD300A, DOCK8, PTPRC, TIGIT, SIRPG, RHOH, ZAP70, VSIR, RAC2, CARD11, CD74, CCL5, SELL, HLA-DPB1, VNN1, IL2RA, CD27, VSIG4, HLA-DRB1, SPN, CCDC88B, CD5, EBI3, ICOS, NCKAP1L, TESPA1,…	95	geneontology_Biological_Process	0.166084	Up
GO:0050863	regulation of T cell activation	91/572	332/18866	2.04e-61	2.66e-58	1.93e-58	RIPK3, PTPN6, VAV1, SASH3, IL18, RASAL3, HLA-E, TNFAIP8L2, CORO1A, LILRB4, IL12RB1, LILRB1, LGALS9, CD4, AIF1, HLA-DMB, SYK, LILRB2, LCK, TNFSF13B, CD2, NLRP3, CD86, TNFSF8, TNFRSF1B, HAVCR2, CD3E, CD300A, DOCK8, PTPRC, TIGIT, SIRPG, RHOH, ZAP70, VSIR, RAC2, CARD11, CD74, CCL5, HLA-DPB1, VNN1, IL2RA, CD27, VSIG4, HLA-DRB1, SPN, CCDC88B, CD5, SIT1, EBI3, ICOS, NCKAP1L, TESPA1, PYCARD, XCL1, TBX21,…	91	geneontology_Biological_Process	0.159091	Up
GO:0070663	regulation of leukocyte proliferation	77/572	240/18866	1.27e-57	1.25e-54	9.04e-55	RIPK3, PTPN6, SASH3, IL18, RASAL3, HLA-E, LST1, BTK, CORO1A, INPP5D, IL12RB1, LILRB1, LGALS9, CD4, AIF1, HLA-DMB, SYK, LILRB2, TNFSF13B, CSF1R, TYROBP, CD86, TNFSF8, TNFRSF1B, HAVCR2, CD3E, CD300A, PTPRC, CSF1, ZAP70, VSIR, RAC2, CARD11, CD74, CCL5, IKZF3, CD38, HLA-DPB1, IL2RA, VSIG4, HLA-DRB1, SPN, CCDC88B, EBI3, NCKAP1L, CCL8, PYCARD, XCL1, CCR2, LYN, HLA-DPA1, CD6, CRTAM, CD209, CD28, FCGR2B,…	77	geneontology_Biological_Process	0.134615	Up
GO:1903037	regulation of leukocyte cell-cell adhesion	87/572	329/18866	3.15e-57	2.47e-54	1.79e-54	PTPN6, VAV1, SASH3, PTAFR, IL18, RASAL3, HLA-E, TNFAIP8L2, CORO1A, LILRB4, IL12RB1, LILRB1, LGALS9, CD4, ITGB2, AIF1, HLA-DMB, SYK, LILRB2, LCK, SKAP1, TNFSF13B, ALOX5, NLRP3, CD86, HAVCR2, CD3E, CD300A, DOCK8, PTPRC, TIGIT, SIRPG, RHOH, ZAP70, VSIR, CARD11, CD74, CCL5, HLA-DPB1, VNN1, IL2RA, CD27, VSIG4, HLA-DRB1, SPN, CCDC88B, CD5, EBI3, ICOS, NCKAP1L, TESPA1, PYCARD, XCL1, TBX21, CCR2, LYN, HL…	87	geneontology_Biological_Process	0.152098	Up
GO:0032944	regulation of mononuclear cell proliferation	74/572	221/18866	6.5e-57	4.25e-54	3.08e-54	RIPK3, PTPN6, SASH3, IL18, RASAL3, HLA-E, LST1, BTK, CORO1A, INPP5D, IL12RB1, LILRB1, LGALS9, CD4, AIF1, HLA-DMB, SYK, LILRB2, TNFSF13B, TYROBP, CD86, TNFSF8, TNFRSF1B, HAVCR2, CD3E, CD300A, PTPRC, CSF1, ZAP70, VSIR, RAC2, CARD11, CD74, CCL5, IKZF3, CD38, HLA-DPB1, IL2RA, VSIG4, HLA-DRB1, SPN, CCDC88B, EBI3, NCKAP1L, PYCARD, XCL1, CCR2, LYN, HLA-DPA1, CD6, CRTAM, CD209, CD28, FCGR2B, CD40, MNDA, …	74	geneontology_Biological_Process	0.129371	Up
GO:0050670	regulation of lymphocyte proliferation	73/572	219/18866	5.59e-56	3.13e-53	2.27e-53	RIPK3, PTPN6, SASH3, IL18, RASAL3, HLA-E, LST1, BTK, CORO1A, INPP5D, IL12RB1, LILRB1, LGALS9, CD4, AIF1, HLA-DMB, SYK, LILRB2, TNFSF13B, TYROBP, CD86, TNFSF8, TNFRSF1B, HAVCR2, CD3E, CD300A, PTPRC, ZAP70, VSIR, RAC2, CARD11, CD74, CCL5, IKZF3, CD38, HLA-DPB1, IL2RA, VSIG4, HLA-DRB1, SPN, CCDC88B, EBI3, NCKAP1L, PYCARD, XCL1, CCR2, LYN, HLA-DPA1, CD6, CRTAM, CD209, CD28, FCGR2B, CD40, MNDA, FOXP3,…	73	geneontology_Biological_Process	0.127622	Up
GO:0070661	leukocyte proliferation	84/572	313/18866	8.45e-56	4.14e-53	3e-53	RIPK3, PTPN6, SASH3, IL18, RASAL3, HLA-E, LST1, BTK, CORO1A, INPP5D, IL12RB1, LILRB1, LGALS9, CD4, AIF1, PSMB10, HLA-DMB, SYK, DOCK2, LILRB2, TNFSF13B, CSF1R, CD180, TYROBP, CD86, TNFSF8, TNFRSF1B, HAVCR2, CD3E, CD300A, DOCK8, PTPRC, CSF1, ZAP70, VSIR, RAC2, CARD11, CD74, CCL5, IKZF3, CD38, HLA-DPB1, IL2RA, VSIG4, HLA-DRB1, SPN, CCDC88B, EBI3, NCKAP1L, CCL8, PYCARD, XCL1, CCR2, LYN, HLA-DPA1, CD6…	84	geneontology_Biological_Process	0.146853	Up
GO:0032943	mononuclear cell proliferation	80/572	286/18866	1.18e-54	5.13e-52	3.73e-52	RIPK3, PTPN6, SASH3, IL18, RASAL3, HLA-E, LST1, BTK, CORO1A, INPP5D, IL12RB1, LILRB1, LGALS9, CD4, AIF1, PSMB10, HLA-DMB, SYK, DOCK2, LILRB2, TNFSF13B, CD180, TYROBP, CD86, TNFSF8, TNFRSF1B, HAVCR2, CD3E, CD300A, DOCK8, PTPRC, CSF1, ZAP70, VSIR, RAC2, CARD11, CD74, CCL5, IKZF3, CD38, HLA-DPB1, IL2RA, VSIG4, HLA-DRB1, SPN, CCDC88B, EBI3, NCKAP1L, PYCARD, XCL1, CCR2, LYN, HLA-DPA1, CD6, CRTAM, CD20…	80	geneontology_Biological_Process	0.13986	Up
GO:0046651	lymphocyte proliferation	79/572	283/18866	6.85e-54	2.68e-51	1.95e-51	RIPK3, PTPN6, SASH3, IL18, RASAL3, HLA-E, LST1, BTK, CORO1A, INPP5D, IL12RB1, LILRB1, LGALS9, CD4, AIF1, PSMB10, HLA-DMB, SYK, DOCK2, LILRB2, TNFSF13B, CD180, TYROBP, CD86, TNFSF8, TNFRSF1B, HAVCR2, CD3E, CD300A, DOCK8, PTPRC, ZAP70, VSIR, RAC2, CARD11, CD74, CCL5, IKZF3, CD38, HLA-DPB1, IL2RA, VSIG4, HLA-DRB1, SPN, CCDC88B, EBI3, NCKAP1L, PYCARD, XCL1, CCR2, LYN, HLA-DPA1, CD6, CRTAM, CD209, CD2…	79	geneontology_Biological_Process	0.138112	Up
GO:0022407	regulation of cell-cell adhesion	91/572	439/18866	5.02e-50	1.79e-47	1.3e-47	PTPN6, VAV1, SASH3, PTAFR, IL18, RASAL3, HLA-E, FERMT3, TNFAIP8L2, CORO1A, LILRB4, IL12RB1, LILRB1, LGALS9, CD4, ITGB2, AIF1, HLA-DMB, SYK, LILRB2, LCK, SKAP1, TNFSF13B, ALOX5, NLRP3, CD86, HAVCR2, CD3E, CD300A, DOCK8, PTPRC, TIGIT, SIRPG, RHOH, ZAP70, VSIR, CARD11, CD74, CCL5, HLA-DPB1, VNN1, IL2RA, CD27, VSIG4, HLA-DRB1, SPN, CCDC88B, CD5, EBI3, ICOS, NCKAP1L, TESPA1, PYCARD, XCL1, TBX21, CCR2,…	91	geneontology_Biological_Process	0.159091	Up
GO:1903039	positive regulation of leukocyte cell-cell adhesion	69/572	235/18866	1.1e-48	3.58e-46	2.59e-46	PTPN6, VAV1, SASH3, PTAFR, IL18, RASAL3, HLA-E, CORO1A, LILRB4, IL12RB1, LILRB1, LGALS9, CD4, ITGB2, AIF1, HLA-DMB, SYK, LILRB2, LCK, SKAP1, TNFSF13B, ALOX5, NLRP3, CD86, HAVCR2, CD3E, DOCK8, PTPRC, SIRPG, RHOH, ZAP70, VSIR, CARD11, CD74, CCL5, HLA-DPB1, VNN1, IL2RA, CD27, CCDC88B, CD5, EBI3, ICOS, NCKAP1L, TESPA1, PYCARD, XCL1, CCR2, LYN, HLA-DPA1, CD6, CCR7, CD209, CD28, PDCD1, MAP3K8, FOXP3, C…	69	geneontology_Biological_Process	0.120629	Up
GO:0050867	positive regulation of cell activation	87/572	421/18866	1.13e-47	3.39e-45	2.46e-45	PTPN6, VAV1, VAMP8, SASH3, PTAFR, IL18, RASAL3, HLA-E, BTK, CORO1A, LILRB4, INPP5D, IL12RB1, LILRB1, LGALS9, CD4, ITGB2, AIF1, HLA-DMB, SYK, ITGAM, LILRB2, LCK, TNFSF13B, CD2, TYROBP, NLRP3, CD86, HAVCR2, CD3E, FCER1G, FGR, DOCK8, PTPRC, CTSC, SIRPG, RHOH, ZAP70, VSIR, CLEC7A, CARD11, CD74, CCL5, CD38, HLA-DPB1, VNN1, IL2RA, CD27, CCDC88B, CD5, EBI3, ICOS, NCKAP1L, CCL3, TESPA1, PYCARD, XCL1, TBX…	87	geneontology_Biological_Process	0.152098	Up
GO:0042129	regulation of T cell proliferation	59/572	167/18866	5.62e-47	1.57e-44	1.14e-44	RIPK3, PTPN6, SASH3, IL18, RASAL3, HLA-E, CORO1A, IL12RB1, LILRB1, LGALS9, CD4, AIF1, HLA-DMB, SYK, LILRB2, TNFSF13B, CD86, TNFSF8, TNFRSF1B, HAVCR2, CD3E, PTPRC, ZAP70, VSIR, RAC2, CARD11, CCL5, HLA-DPB1, IL2RA, VSIG4, HLA-DRB1, SPN, CCDC88B, EBI3, NCKAP1L, PYCARD, XCL1, CCR2, HLA-DPA1, CD6, CRTAM, CD209, CD28, FOXP3, CTLA4, JAK3, PLA2G2D, IRF1, CCL19, IDO1, CLEC4G, ANXA1, IL6, PDCD1LG2, CD55, L…	59	geneontology_Biological_Process	0.103147	Up
GO:0022409	positive regulation of cell-cell adhesion	72/572	279/18866	1.74e-46	4.53e-44	3.29e-44	PTPN6, VAV1, SASH3, PTAFR, IL18, RASAL3, HLA-E, CORO1A, LILRB4, IL12RB1, LILRB1, LGALS9, CD4, ITGB2, AIF1, HLA-DMB, SYK, LILRB2, LCK, SKAP1, TNFSF13B, ALOX5, NLRP3, CD86, HAVCR2, CD3E, DOCK8, PTPRC, SIRPG, RHOH, ZAP70, VSIR, CARD11, CD74, CCL5, HLA-DPB1, VNN1, IL2RA, CD27, CCDC88B, CD5, EBI3, ICOS, NCKAP1L, TESPA1, PYCARD, XCL1, CCR2, LYN, HLA-DPA1, CD6, CCR7, CD209, CD28, PDCD1, MAP3K8, FOXP3, C…	72	geneontology_Biological_Process	0.125874	Up
GO:0042098	T cell proliferation	62/572	195/18866	3.94e-46	9.65e-44	7e-44	RIPK3, PTPN6, SASH3, IL18, RASAL3, HLA-E, CORO1A, IL12RB1, LILRB1, LGALS9, CD4, AIF1, PSMB10, HLA-DMB, SYK, DOCK2, LILRB2, TNFSF13B, CD86, TNFSF8, TNFRSF1B, HAVCR2, CD3E, DOCK8, PTPRC, ZAP70, VSIR, RAC2, CARD11, CCL5, HLA-DPB1, IL2RA, VSIG4, HLA-DRB1, SPN, CCDC88B, EBI3, NCKAP1L, PYCARD, XCL1, CCR2, HLA-DPA1, CD6, CRTAM, CD209, CD28, FOXP3, CTLA4, JAK3, PLA2G2D, IRF1, CCL19, IDO1, CLEC4G, ANXA1, …	62	geneontology_Biological_Process	0.108392	Up
GO:0002696	positive regulation of leukocyte activation	84/572	406/18866	4.71e-46	1.09e-43	7.88e-44	PTPN6, VAV1, VAMP8, SASH3, PTAFR, IL18, RASAL3, HLA-E, BTK, CORO1A, LILRB4, INPP5D, IL12RB1, LILRB1, LGALS9, CD4, ITGB2, AIF1, HLA-DMB, SYK, ITGAM, LILRB2, LCK, TNFSF13B, CD2, TYROBP, NLRP3, CD86, HAVCR2, CD3E, FCER1G, FGR, DOCK8, PTPRC, CTSC, SIRPG, RHOH, ZAP70, VSIR, CLEC7A, CARD11, CD74, CCL5, CD38, HLA-DPB1, VNN1, IL2RA, CD27, CCDC88B, CD5, EBI3, ICOS, NCKAP1L, CCL3, TESPA1, PYCARD, XCL1, TBX…	84	geneontology_Biological_Process	0.146853	Up
GO:0050870	positive regulation of T cell activation	64/572	214/18866	9.93e-46	2.16e-43	1.57e-43	PTPN6, VAV1, SASH3, IL18, RASAL3, HLA-E, CORO1A, LILRB4, IL12RB1, LILRB1, LGALS9, CD4, AIF1, HLA-DMB, SYK, LILRB2, LCK, TNFSF13B, NLRP3, CD86, HAVCR2, CD3E, DOCK8, PTPRC, SIRPG, RHOH, ZAP70, VSIR, CARD11, CD74, CCL5, HLA-DPB1, VNN1, IL2RA, CD27, CCDC88B, CD5, EBI3, ICOS, NCKAP1L, TESPA1, PYCARD, XCL1, CCR2, LYN, HLA-DPA1, CD6, CCR7, CD209, CD28, PDCD1, MAP3K8, FOXP3, CTLA4, JAK3, IL7R, CCL2, CCL1…	64	geneontology_Biological_Process	0.111888	Up
GO:0051251	positive regulation of lymphocyte activation	74/572	357/18866	1.34e-40	2.75e-38	2e-38	PTPN6, VAV1, SASH3, IL18, RASAL3, HLA-E, BTK, CORO1A, LILRB4, INPP5D, IL12RB1, LILRB1, LGALS9, CD4, AIF1, HLA-DMB, SYK, LILRB2, LCK, TNFSF13B, TYROBP, NLRP3, CD86, HAVCR2, CD3E, DOCK8, PTPRC, SIRPG, RHOH, ZAP70, VSIR, CLEC7A, CARD11, CD74, CCL5, CD38, HLA-DPB1, VNN1, IL2RA, CD27, CCDC88B, CD5, EBI3, ICOS, NCKAP1L, TESPA1, PYCARD, XCL1, TBX21, CCR2, LYN, HLA-DPA1, CD6, CCR7, CD209, CD28, PDCD1, CD…	74	geneontology_Biological_Process	0.129371	Up
GO:0034341	response to interferon-gamma	58/572	202/18866	2.29e-40	4.48e-38	3.25e-38	PTAFR, WAS, HLA-E, HCK, IRF8, IL12RB1, LGALS9, AIF1, FCGR1B, CCL4, FCGR1A, CASP1, TLR2, CCL5, HLA-DPB1, HLA-DRB1, IRF5, FASLG, HLA-DRA, CCL3, CCL8, XCL2, HLA-B, XCL1, CCL23, CXCL16, HLA-DPA1, MRC1, GBP5, HLA-C, STXBP2, RAB20, CCL3L1, CD40, HLA-DQA1, HLA-DRB5, CIITA, CCL13, HLA-DQB1, IRF1, HLA-F, UBD, GBP4, CCL2, HLA-DQB2, TLR4, CCL19, CCL17, IFITM1, CDC42EP2, OAS1, ICAM1, BST2, CCL18, HLA-DQA2, C…	58	geneontology_Biological_Process	0.101399	Up
GO:0002697	regulation of immune effector process	83/572	470/18866	5.79e-40	1.08e-37	7.83e-38	RIPK3, PTPN6, VAV1, VAMP8, SASH3, PTAFR, IL18, WAS, HLA-E, BTK, IL12RB1, LILRB1, LGALS9, ITGB2, SCIMP, HLA-DMB, SYK, ITGAM, TYROBP, NLRP3, SLAMF6, C1QA, CD86, C1QC, TNFRSF1B, HAVCR2, CD300A, FCER1G, FGR, SH2D1A, C1QB, CD96, C3AR1, PTPRC, CD84, RAC2, CD74, NCR3, CFP, IL2RA, VSIG4, PYCARD, HLA-B, XCL1, TBX21, CCR2, SLAMF8, LYN, CR1, ZNF683, CRTAM, C3, SERPING1, CD28, FCGR2B, STXBP2, CD40, FOXP3, MZ…	83	geneontology_Biological_Process	0.145105	Up
GO:0045785	positive regulation of cell adhesion	79/572	428/18866	1.79e-39	3.19e-37	2.32e-37	PTPN6, VAV1, SASH3, PTAFR, IL18, RASAL3, HLA-E, CORO1A, LILRB4, IL12RB1, LILRB1, LGALS9, CD4, ITGB2, AIF1, HLA-DMB, SYK, LILRB2, LCK, SKAP1, TNFSF13B, ALOX5, NLRP3, CD86, HAVCR2, CD3E, APBB1IP, DOCK8, PTPRC, CSF1, SIRPG, RHOH, ZAP70, VSIR, CARD11, CD74, CCL5, HLA-DPB1, VNN1, IL2RA, CD27, CCDC88B, CD5, EBI3, ICOS, NCKAP1L, TESPA1, PYCARD, XCL1, CCR2, LYN, HLA-DPA1, CD6, CCR7, CD209, CD28, PDCD1, M…	79	geneontology_Biological_Process	0.138112	Up
GO:0043312	neutrophil degranulation	83/572	487/18866	9.36e-39	1.59e-36	1.16e-36	PTPN6, VAMP8, BIN2, PTAFR, ARHGAP9, GMFG, ARHGAP45, CTSS, CD33, LAIR1, CYBA, ITGB2, CD53, TRPM2, SYK, ITGAM, CYBB, DOCK2, LILRB2, ALOX5, DOK3, ITGAL, TYROBP, CD14, HK3, TNFRSF1B, LILRB3, CD300A, FCER1G, FGR, NFAM1, TBC1D10C, C3AR1, PTPRC, CTSC, SIGLEC9, TLR2, SELL, ADA2, CFP, VNN1, FUCA1, FPR1, NCKAP1L, SIGLEC14, RNASET2, PYCARD, CLEC12A, HLA-B, CTSZ, TMC6, CR1, SERPINA1, S100A9, C3, HLA-C, FCGR2…	83	geneontology_Biological_Process	0.145105	Up
GO:0030098	lymphocyte differentiation	73/572	368/18866	1.11e-38	1.81e-36	1.31e-36	RIPK3, PTPN6, VAV1, SASH3, IL18, BATF, BTK, LILRB4, INPP5D, IL12RB1, MFNG, LGALS9, CD4, SPI1, SYK, DOCK2, IKZF1, LILRB2, CD3D, LCK, CD2, NLRP3, SLAMF6, CD86, TNFSF8, CD3E, FCER1G, NFAM1, PTPRC, CD3G, RHOH, ZAP70, VSIR, LYL1, CARD11, CD74, IKZF3, VNN1, IL2RA, CD27, SPN, NCKAP1L, TESPA1, TBX21, CCR2, SLAMF8, CD8A, CCR7, CR1, ZNF683, CRTAM, PIK3CD, CD28, FCGR2B, HLA-DOA, FOXP3, CLEC4E, CTLA4, EOMES,…	73	geneontology_Biological_Process	0.127622	Up
GO:0002283	neutrophil activation involved in immune response	83/572	490/18866	1.51e-38	2.37e-36	1.72e-36	PTPN6, VAMP8, BIN2, PTAFR, ARHGAP9, GMFG, ARHGAP45, CTSS, CD33, LAIR1, CYBA, ITGB2, CD53, TRPM2, SYK, ITGAM, CYBB, DOCK2, LILRB2, ALOX5, DOK3, ITGAL, TYROBP, CD14, HK3, TNFRSF1B, LILRB3, CD300A, FCER1G, FGR, NFAM1, TBC1D10C, C3AR1, PTPRC, CTSC, SIGLEC9, TLR2, SELL, ADA2, CFP, VNN1, FUCA1, FPR1, NCKAP1L, SIGLEC14, RNASET2, PYCARD, CLEC12A, HLA-B, CTSZ, TMC6, CR1, SERPINA1, S100A9, C3, HLA-C, FCGR2…	83	geneontology_Biological_Process	0.145105	Up
GO:0030595	leukocyte chemotaxis	59/572	232/18866	9.41e-38	1.42e-35	1.03e-35	VAV1, GPSM3, CORO1A, CSF3R, JAML, LGALS9, ITGB2, AIF1, TRPM2, SYK, ALOX5, CSF1R, CXCR3, IL16, FCER1G, CCL4, C3AR1, CSF1, CCR5, RAC2, CD74, CCL5, CCR1, NCKAP1L, CCL3, CCL8, XCL2, XCL1, CCR2, SLAMF8, LYN, CCL23, CXCL16, CCR7, LGMN, S100A9, PIK3CD, CCL3L1, CXCL9, CXCL10, CXCL11, CMKLR1, CCL13, CXCL13, CCL2, CCL19, S100A8, CCL17, C5AR1, HSD3B7, CXCL1, ANXA1, IL6, CCL18, CXCL12, CCL26, SERPINE1, VEGFD…	59	geneontology_Biological_Process	0.103147	Up
GO:0071346	cellular response to interferon-gamma	53/572	182/18866	2.72e-37	3.94e-35	2.86e-35	PTAFR, WAS, HLA-E, HCK, IRF8, IL12RB1, LGALS9, AIF1, FCGR1B, CCL4, FCGR1A, CASP1, TLR2, CCL5, HLA-DPB1, HLA-DRB1, IRF5, FASLG, HLA-DRA, CCL3, CCL8, XCL2, HLA-B, XCL1, CCL23, HLA-DPA1, MRC1, GBP5, HLA-C, STXBP2, RAB20, CCL3L1, HLA-DQA1, HLA-DRB5, CIITA, CCL13, HLA-DQB1, IRF1, HLA-F, GBP4, CCL2, HLA-DQB2, TLR4, CCL19, CCL17, CDC42EP2, OAS1, ICAM1, CCL18, HLA-DQA2, CCL26, OASL, MT2A	53	geneontology_Biological_Process	0.0926573	Up
GO:0070665	positive regulation of leukocyte proliferation	49/572	150/18866	3.14e-37	4.39e-35	3.18e-35	SASH3, IL18, RASAL3, HLA-E, CORO1A, IL12RB1, LGALS9, CD4, AIF1, HLA-DMB, SYK, LILRB2, TNFSF13B, CSF1R, CD86, HAVCR2, CD3E, PTPRC, CSF1, ZAP70, CARD11, CD74, CCL5, CD38, HLA-DPB1, IL2RA, CCDC88B, EBI3, NCKAP1L, PYCARD, XCL1, CCR2, LYN, HLA-DPA1, CD6, CD209, CD28, CD40, FOXP3, JAK3, TLR4, CCL19, BST2, ANXA1, IL6, PDCD1LG2, CD55, TNFSF9, CD70	49	geneontology_Biological_Process	0.0856643	Up
GO:0002703	regulation of leukocyte mediated immunity	56/572	211/18866	5.94e-37	8.02e-35	5.82e-35	RIPK3, PTPN6, VAV1, VAMP8, SASH3, PTAFR, IL18, WAS, HLA-E, BTK, IL12RB1, LILRB1, LGALS9, ITGB2, SCIMP, SYK, ITGAM, TYROBP, NLRP3, SLAMF6, TNFRSF1B, HAVCR2, CD300A, FCER1G, FGR, SH2D1A, CD96, PTPRC, CD84, RAC2, NCR3, HLA-B, XCL1, TBX21, CCR2, LYN, CR1, CRTAM, C3, CD28, FCGR2B, STXBP2, CD40, FOXP3, JAK3, HLA-F, IL7R, TLR4, CLEC4G, ICAM1, BST2, IL6, HMOX1, CD1C, LAG3, IL20RB	56	geneontology_Biological_Process	0.0979021	Up
GO:1902105	regulation of leukocyte differentiation	63/572	290/18866	7.07e-36	9.23e-34	6.7e-34	PTPN6, SASH3, IL18, BTK, LILRB4, INPP5D, IL12RB1, LILRB1, LGALS9, CD4, SYK, HCLS1, LILRB2, EVI2B, CD2, TYROBP, NLRP3, CD86, C1QC, LILRB3, NFAM1, PTPRC, CSF1, RHOH, ZAP70, VSIR, CARD11, CD74, IKZF3, CCR1, VNN1, IL2RA, CD27, HLA-DRB1, NCKAP1L, CCL3, TESPA1, HLA-B, TBX21, CCR2, SLAMF8, LYN, CR1, ZNF683, CRTAM, CD28, FCGR2B, HLA-DOA, FOXP3, CTLA4, JAK3, TNFRSF18, IRF1, IL7R, TLR4, CCL19, TMEM176B, TM…	63	geneontology_Biological_Process	0.11014	Up
GO:0042102	positive regulation of T cell proliferation	41/572	101/18866	8.57e-36	1.08e-33	7.85e-34	SASH3, IL18, RASAL3, HLA-E, CORO1A, IL12RB1, LGALS9, CD4, AIF1, HLA-DMB, SYK, LILRB2, TNFSF13B, CD86, HAVCR2, CD3E, PTPRC, ZAP70, CARD11, CCL5, HLA-DPB1, IL2RA, CCDC88B, EBI3, NCKAP1L, PYCARD, XCL1, CCR2, HLA-DPA1, CD6, CD209, CD28, FOXP3, JAK3, CCL19, ANXA1, IL6, PDCD1LG2, CD55, TNFSF9, CD70	41	geneontology_Biological_Process	0.0716783	Up
GO:0032946	positive regulation of mononuclear cell proliferation	46/572	137/18866	1.28e-35	1.56e-33	1.13e-33	SASH3, IL18, RASAL3, HLA-E, CORO1A, IL12RB1, LGALS9, CD4, AIF1, HLA-DMB, SYK, LILRB2, TNFSF13B, CD86, HAVCR2, CD3E, PTPRC, CSF1, ZAP70, CARD11, CD74, CCL5, CD38, HLA-DPB1, IL2RA, CCDC88B, EBI3, NCKAP1L, PYCARD, XCL1, CCR2, HLA-DPA1, CD6, CD209, CD28, CD40, FOXP3, JAK3, TLR4, CCL19, ANXA1, IL6, PDCD1LG2, CD55, TNFSF9, CD70	46	geneontology_Biological_Process	0.0804196	Up
GO:0030217	T cell differentiation	59/572	253/18866	1.83e-35	2.17e-33	1.58e-33	RIPK3, VAV1, SASH3, IL18, BATF, LILRB4, IL12RB1, LGALS9, CD4, SYK, DOCK2, LILRB2, CD3D, LCK, CD2, NLRP3, SLAMF6, CD86, TNFSF8, CD3E, FCER1G, PTPRC, CD3G, RHOH, ZAP70, VSIR, CARD11, CD74, VNN1, IL2RA, CD27, SPN, NCKAP1L, TESPA1, TBX21, CCR2, CD8A, CCR7, CR1, ZNF683, CRTAM, PIK3CD, CD28, HLA-DOA, FOXP3, CLEC4E, CTLA4, EOMES, JAK3, TNFRSF18, PLA2G2D, IRF1, IL7R, CCL19, ANXA1, IL6, FGL2, LAG3, TNFSF9	59	geneontology_Biological_Process	0.103147	Up
GO:0002683	negative regulation of immune system process	77/572	463/18866	3.56e-35	4.09e-33	2.97e-33	PTPN6, HLA-E, LST1, TNFAIP8L2, BTK, LILRB4, INPP5D, LILRB1, LGALS9, LILRB2, TYROBP, SAMSN1, CD86, C1QC, HAVCR2, LILRB3, SLA2, CD300A, FCER1G, FGR, SH2D1A, TBC1D10C, CD96, PTPRC, UBASH3A, TIGIT, CD84, CD200R1, VSIR, CD74, IL2RA, VSIG4, CST7, HLA-DRB1, SPN, MILR1, CCL3, HLA-B, XCL1, TBX21, CCR2, SLAMF8, LYN, CR1, CD300LF, CRTAM, SERPING1, FCGR2B, HLA-DOA, GPR171, PDCD1, MNDA, FOXP3, CTLA4, CD68, JA…	77	geneontology_Biological_Process	0.134615	Up
GO:0050671	positive regulation of lymphocyte proliferation	45/572	136/18866	1.52e-34	1.7e-32	1.24e-32	SASH3, IL18, RASAL3, HLA-E, CORO1A, IL12RB1, LGALS9, CD4, AIF1, HLA-DMB, SYK, LILRB2, TNFSF13B, CD86, HAVCR2, CD3E, PTPRC, ZAP70, CARD11, CD74, CCL5, CD38, HLA-DPB1, IL2RA, CCDC88B, EBI3, NCKAP1L, PYCARD, XCL1, CCR2, HLA-DPA1, CD6, CD209, CD28, CD40, FOXP3, JAK3, TLR4, CCL19, ANXA1, IL6, PDCD1LG2, CD55, TNFSF9, CD70	45	geneontology_Biological_Process	0.0786713	Up
GO:0001819	positive regulation of cytokine production	75/572	447/18866	1.57e-34	1.7e-32	1.24e-32	SASH3, GPSM3, PTAFR, IL18, HLA-E, IRF8, IL12RB1, LILRB1, LGALS9, CYBA, CD4, AIF1, SCIMP, LTB, SYK, CARD9, TLR8, LILRB2, CD2, TYROBP, NLRP3, SLAMF6, CD86, CD14, HAVCR2, CD3E, IL16, FCER1G, FGR, NFAM1, C3AR1, PTPRC, TIGIT, CASP1, CLEC7A, CARD11, CD74, TLR2, PYHIN1, HLA-DPB1, IRF5, CCDC88B, EBI3, CCL3, TLR7, PYCARD, XCL1, CCR2, HLA-DPA1, CD6, CCR7, CRTAM, C3, GBP5, CD28, CD40, FCN1, MNDA, FOXP3, CLE…	75	geneontology_Biological_Process	0.131119	Up
GO:0060326	cell chemotaxis	62/572	311/18866	4.97e-33	5.26e-31	3.82e-31	VAV1, BIN2, GPSM3, CORO1A, CSF3R, JAML, LGALS9, ITGB2, AIF1, TRPM2, SYK, ALOX5, CSF1R, CXCR3, CCRL2, IL16, FCER1G, CCL4, C3AR1, CSF1, CCR5, RAC2, CD74, CCL5, CCR1, CXCR6, NCKAP1L, CCL3, CCL8, XCL2, XCL1, CCR2, SLAMF8, LYN, CCL23, CXCL16, CCR7, LGMN, S100A9, PIK3CD, CCL3L1, CXCL9, CXCL10, CXCL11, CMKLR1, CCL13, CXCL13, CCL2, CCL19, S100A8, CCL17, C5AR1, HSD3B7, CXCL1, ANXA1, IL6, CCL18, CXCL12, CC…	62	geneontology_Biological_Process	0.108392	Up
GO:0002695	negative regulation of leukocyte activation	49/572	184/18866	1.67e-32	1.72e-30	1.25e-30	PTPN6, LST1, TNFAIP8L2, BTK, INPP5D, LILRB1, LGALS9, LILRB2, TYROBP, SAMSN1, CD86, HAVCR2, CD300A, FGR, TBC1D10C, PTPRC, TIGIT, CD84, VSIR, CD74, IL2RA, VSIG4, CST7, HLA-DRB1, SPN, MILR1, XCL1, TBX21, CCR2, LYN, CD300LF, CRTAM, FCGR2B, MNDA, FOXP3, CTLA4, JAK3, PLA2G2D, IRF1, HLA-F, IDO1, CLEC4G, ANXA1, HMOX1, PDCD1LG2, FGL2, LRRC32, LAG3, IL20RB	49	geneontology_Biological_Process	0.0856643	Up
GO:0002449	lymphocyte mediated immunity	66/572	366/18866	2.31e-32	2.32e-30	1.69e-30	RIPK3, PTPN6, VAV1, SASH3, IL18, WAS, HLA-E, BATF, BTK, CORO1A, INPP5D, IL12RB1, LILRB1, LGALS9, TLR8, NLRP3, SLAMF6, C1QA, C1QC, TNFRSF1B, HAVCR2, SLA2, FCER1G, SH2D1A, MYO1G, C1QB, CD96, PTPRC, PRF1, CTSC, CD74, NCR3, SLAMF7, CD27, HLA-DRB1, GZMM, HLA-B, XCL1, TBX21, CCR2, CD8A, CR1, CRTAM, C3, SERPING1, CD28, FCGR2B, CD40, FOXP3, C2, GZMB, HLA-DQB1, C1S, HLA-F, IL7R, C1R, IGLL5, CLEC4G, ICAM1,…	66	geneontology_Biological_Process	0.115385	Up
GO:0097529	myeloid leukocyte migration	52/572	222/18866	1.93e-31	1.89e-29	1.37e-29	VAV1, CSF3R, JAML, ITGB2, AIF1, SYK, CSF1R, CD300A, FCER1G, CCL4, C3AR1, CSF1, RHOH, CD200R1, RAC2, CD74, CCL5, CCR1, NCKAP1L, CCL3, CCL8, XCL2, XCL1, CCR2, SLAMF8, LYN, CCL23, CCR7, LGMN, S100A9, PIK3CD, CCL3L1, CXCL9, CXCL10, CXCL11, CMKLR1, CCL13, CXCL13, CCL2, CCL19, S100A8, CCL17, C5AR1, CXCL1, ANXA1, IL6, CCL18, CXCL12, CCL26, TREM2, SERPINE1, VEGFD	52	geneontology_Biological_Process	0.0909091	Up
GO:0002460	adaptive immune response based on somatic recombination of immune receptors built from immunoglobulin superfamily domains	65/572	370/18866	3.52e-31	3.36e-29	2.44e-29	RIPK3, PTPN6, SASH3, IL18, WAS, HLA-E, BATF, BTK, INPP5D, IL12RB1, LILRB1, CD4, TLR8, TNFSF13B, NLRP3, SLAMF6, C1QA, C1QC, TNFRSF1B, HAVCR2, SLA2, FCER1G, MYO1G, C1QB, PTPRC, PRF1, CTSC, CD74, CD27, HLA-DRB1, SPN, EBI3, GZMM, HLA-B, XCL1, TBX21, CCR2, CD8A, CR1, C3, SERPING1, CD28, FCGR2B, CD40, FOXP3, JAK3, C2, HLA-DQB1, C1S, HLA-F, IL7R, CXCL13, C1R, TLR4, CCL19, IGLL5, CLEC4G, ICAM1, ANXA1, IL…	65	geneontology_Biological_Process	0.113636	Up
GO:0050866	negative regulation of cell activation	50/572	207/18866	6.05e-31	5.64e-29	4.09e-29	PTPN6, LST1, TNFAIP8L2, BTK, INPP5D, LILRB1, LGALS9, LILRB2, TYROBP, SAMSN1, CD86, HAVCR2, CD300A, FGR, TBC1D10C, PTPRC, TIGIT, CD84, VSIR, CD74, IL2RA, VSIG4, CST7, HLA-DRB1, SPN, MILR1, XCL1, TBX21, CCR2, LYN, CD300LF, CRTAM, FCGR2B, MNDA, FOXP3, CTLA4, JAK3, PLA2G2D, IRF1, HLA-F, IDO1, CLEC4G, APOE, ANXA1, HMOX1, PDCD1LG2, FGL2, LRRC32, LAG3, IL20RB	50	geneontology_Biological_Process	0.0874126	Up
GO:0002429	immune response-activating cell surface receptor signaling pathway	72/572	481/18866	6.95e-30	6.19e-28	4.49e-28	PTPN6, VAV1, LCP2, WAS, HCK, BTK, FYB1, LILRB4, INPP5D, CD4, PSMB10, SYK, CARD9, CD3D, LCK, SKAP1, LAT2, CD247, CD3E, SLA2, CD300A, FCER1G, FGR, SH2D1A, ICAM3, MYO1G, NFAM1, C3AR1, PTPRC, UBASH3A, FCGR1A, CD3G, ZAP70, CLEC4A, CARD11, NCR3, CD38, CLEC10A, HLA-DPB1, THEMIS2, HLA-DRB1, FPR1, NCKAP1L, HLA-DRA, TESPA1, LYN, HLA-DPA1, CCR7, CR1, FPR3, FCGR3A, PIK3CD, FCGR2A, CD209, CD28, FCGR2B, FCN1, …	72	geneontology_Biological_Process	0.125874	Up
GO:0002757	immune response-activating signal transduction	72/572	481/18866	6.95e-30	6.19e-28	4.49e-28	PTPN6, VAV1, LCP2, WAS, HCK, BTK, FYB1, LILRB4, INPP5D, CD4, PSMB10, SYK, CARD9, CD3D, LCK, SKAP1, LAT2, CD247, CD3E, SLA2, CD300A, FCER1G, FGR, SH2D1A, ICAM3, MYO1G, NFAM1, C3AR1, PTPRC, UBASH3A, FCGR1A, CD3G, ZAP70, CLEC4A, CARD11, NCR3, CD38, CLEC10A, HLA-DPB1, THEMIS2, HLA-DRB1, FPR1, NCKAP1L, HLA-DRA, TESPA1, LYN, HLA-DPA1, CCR7, CR1, FPR3, FCGR3A, PIK3CD, FCGR2A, CD209, CD28, FCGR2B, FCN1, …	72	geneontology_Biological_Process	0.125874	Up
GO:0072676	lymphocyte migration	38/572	117/18866	5.51e-29	4.8e-27	3.48e-27	RIPK3, AIF1, CXCR3, ITGAL, CCL4, MYO1G, DOCK8, ZAP70, CD200R1, CCL5, SPN, CCL3, CCL8, XCL2, PYCARD, XCL1, TBX21, CCR2, CCL23, CXCL16, CCR7, CRTAM, PIK3CD, CCL3L1, CXCL10, CXCL11, CCL13, CXCL13, CCL2, CCL19, CCL17, HSD3B7, ICAM1, CCL18, CXCL12, CCL26, ECM1, CXCL14	38	geneontology_Biological_Process	0.0664336	Up
GO:0045619	regulation of lymphocyte differentiation	45/572	181/18866	1.6e-28	1.36e-26	9.86e-27	PTPN6, SASH3, IL18, BTK, LILRB4, INPP5D, IL12RB1, LGALS9, SYK, LILRB2, CD2, NLRP3, CD86, NFAM1, PTPRC, RHOH, ZAP70, VSIR, CARD11, CD74, IKZF3, VNN1, IL2RA, CD27, NCKAP1L, TESPA1, TBX21, CCR2, SLAMF8, CR1, ZNF683, CRTAM, CD28, HLA-DOA, FOXP3, CTLA4, JAK3, TNFRSF18, IRF1, IL7R, CCL19, ANXA1, FGL2, LAG3, TNFSF9	45	geneontology_Biological_Process	0.0786713	Up
GO:0051250	negative regulation of lymphocyte activation	42/572	154/18866	1.86e-28	1.55e-26	1.12e-26	PTPN6, LST1, TNFAIP8L2, BTK, INPP5D, LILRB1, LGALS9, LILRB2, TYROBP, SAMSN1, CD86, HAVCR2, CD300A, FGR, TBC1D10C, TIGIT, VSIR, CD74, IL2RA, VSIG4, HLA-DRB1, SPN, XCL1, TBX21, LYN, CRTAM, FCGR2B, MNDA, FOXP3, CTLA4, JAK3, PLA2G2D, IRF1, HLA-F, IDO1, CLEC4G, ANXA1, PDCD1LG2, FGL2, LRRC32, LAG3, IL20RB	42	geneontology_Biological_Process	0.0734266	Up
GO:0002699	positive regulation of immune effector process	49/572	223/18866	2.65e-28	2.16e-26	1.57e-26	VAV1, VAMP8, SASH3, PTAFR, IL18, HLA-E, BTK, IL12RB1, LILRB1, LGALS9, ITGB2, SCIMP, HLA-DMB, SYK, ITGAM, TYROBP, NLRP3, SLAMF6, CD86, CD300A, FCER1G, FGR, SH2D1A, PTPRC, CD84, RAC2, CD74, NCR3, HLA-B, XCL1, TBX21, CCR2, LYN, CRTAM, C3, CD28, STXBP2, CD40, FOXP3, MZB1, HLA-F, TLR4, CCL19, ANXA1, IL6, HMOX1, CD1C, LAG3, PLA2G5	49	geneontology_Biological_Process	0.0856643	Up
GO:0097530	granulocyte migration	41/572	150/18866	7.59e-28	6.06e-26	4.4e-26	VAV1, CSF3R, JAML, ITGB2, SYK, CSF1R, CD300A, FCER1G, CCL4, C3AR1, CSF1, RHOH, RAC2, CD74, CCL5, NCKAP1L, CCL3, CCL8, XCL2, XCL1, SLAMF8, CCL23, CCR7, S100A9, PIK3CD, CCL3L1, CXCL9, CXCL10, CXCL11, CMKLR1, CCL13, CXCL13, CCL2, CCL19, S100A8, CCL17, C5AR1, CXCL1, ANXA1, CCL18, CCL26	41	geneontology_Biological_Process	0.0716783	Up
GO:0071621	granulocyte chemotaxis	38/572	127/18866	1.71e-27	1.34e-25	9.73e-26	VAV1, CSF3R, JAML, ITGB2, SYK, CSF1R, FCER1G, CCL4, C3AR1, CSF1, RAC2, CD74, CCL5, NCKAP1L, CCL3, CCL8, XCL2, XCL1, CCL23, CCR7, S100A9, PIK3CD, CCL3L1, CXCL9, CXCL10, CXCL11, CMKLR1, CCL13, CXCL13, CCL2, CCL19, S100A8, CCL17, C5AR1, CXCL1, ANXA1, CCL18, CCL26	38	geneontology_Biological_Process	0.0664336	Up
GO:0002685	regulation of leukocyte migration	47/572	212/18866	2.28e-27	1.75e-25	1.27e-25	RIPK3, GPSM3, PTAFR, LGALS9, AIF1, CSF1R, CXCR3, CD300A, CCL4, DOCK8, C3AR1, CSF1, RHOH, CD200R1, RAC2, CD74, CCL5, CCR1, SPN, NCKAP1L, CCL3, CCL8, XCL2, PYCARD, XCL1, CCR2, SLAMF8, LYN, CCR7, LGMN, CXCL10, CMKLR1, TNFRSF18, CXCL13, CCL2, CCL19, C5AR1, ICAM1, ANXA1, IL6, HMOX1, CXCL12, TREM2, SERPINE1, ECM1, VEGFD, CXCL14	47	geneontology_Biological_Process	0.0821678	Up
GO:0002237	response to molecule of bacterial origin	59/572	356/18866	5.84e-27	4.4e-25	3.19e-25	CSF2RB, PTAFR, IL18, IL10RA, HCK, IRF8, LILRB1, LGALS9, SCIMP, CARD9, LILRB2, LY86, CD180, NLRP3, CD86, CD14, TNFRSF1B, HAVCR2, CD96, CCR5, CASP1, TLR2, CCL5, IRF5, FASLG, CCL3, PYCARD, LYN, CD6, CCR7, S100A9, MRC1, FCGR2B, CXCL9, CD40, CXCL10, CD68, CXCL11, CXCL13, GGT5, CCL2, TLR4, S100A8, IDO1, C5AR1, CXCL1, ICAM1, PTGES, IL6, DCN, TFPI, PDCD1LG2, CD55, ALPL, TREM2, CTSG, SLPI, ACP5, SERPINE1	59	geneontology_Biological_Process	0.103147	Up
GO:1903706	regulation of hemopoiesis	69/572	498/18866	1.36e-26	1e-24	7.29e-25	PTPN6, SASH3, IL18, BTK, LILRB4, CSF3R, INPP5D, IL12RB1, LILRB1, LGALS9, CD4, SPI1, PSMB10, SYK, HCLS1, LILRB2, EVI2B, CD2, TYROBP, NLRP3, CD86, C1QC, LILRB3, NFAM1, PTPRC, CSF1, RHOH, ZAP70, VSIR, CARD11, CD74, IKZF3, CCR1, VNN1, IL2RA, CD27, HLA-DRB1, NCKAP1L, CCL3, TESPA1, HLA-B, TBX21, CCR2, SLAMF8, LYN, CR1, ZNF683, CRTAM, CD28, FCGR2B, HLA-DOA, GPR171, FOXP3, CTLA4, JAK3, TNFRSF18, IRF1, IL…	69	geneontology_Biological_Process	0.120629	Up
GO:0030593	neutrophil chemotaxis	34/572	103/18866	2.54e-26	1.84e-24	1.34e-24	VAV1, CSF3R, JAML, ITGB2, SYK, FCER1G, CCL4, C3AR1, RAC2, CD74, CCL5, NCKAP1L, CCL3, CCL8, XCL2, XCL1, CCL23, CCR7, S100A9, PIK3CD, CCL3L1, CXCL9, CXCL10, CXCL11, CCL13, CXCL13, CCL2, CCL19, S100A8, CCL17, C5AR1, CXCL1, CCL18, CCL26	34	geneontology_Biological_Process	0.0594406	Up
GO:0032496	response to lipopolysaccharide	56/572	334/18866	6.89e-26	4.91e-24	3.56e-24	CSF2RB, PTAFR, IL18, IL10RA, HCK, IRF8, LILRB1, LGALS9, SCIMP, LILRB2, LY86, CD180, NLRP3, CD86, CD14, TNFRSF1B, HAVCR2, CD96, CCR5, CASP1, TLR2, CCL5, FASLG, CCL3, PYCARD, LYN, CD6, CCR7, S100A9, MRC1, CXCL9, CD40, CXCL10, CD68, CXCL11, CXCL13, GGT5, CCL2, TLR4, S100A8, IDO1, C5AR1, CXCL1, ICAM1, PTGES, IL6, DCN, TFPI, PDCD1LG2, CD55, ALPL, TREM2, CTSG, SLPI, ACP5, SERPINE1	56	geneontology_Biological_Process	0.0979021	Up
GO:1990266	neutrophil migration	36/572	122/18866	7.2e-26	5.03e-24	3.65e-24	VAV1, CSF3R, JAML, ITGB2, SYK, FCER1G, CCL4, C3AR1, RHOH, RAC2, CD74, CCL5, NCKAP1L, CCL3, CCL8, XCL2, XCL1, SLAMF8, CCL23, CCR7, S100A9, PIK3CD, CCL3L1, CXCL9, CXCL10, CXCL11, CCL13, CXCL13, CCL2, CCL19, S100A8, CCL17, C5AR1, CXCL1, CCL18, CCL26	36	geneontology_Biological_Process	0.0629371	Up
GO:0045580	regulation of T cell differentiation	39/572	150/18866	1.2e-25	8.21e-24	5.96e-24	SASH3, IL18, LILRB4, IL12RB1, LGALS9, SYK, LILRB2, CD2, NLRP3, CD86, PTPRC, RHOH, ZAP70, VSIR, CARD11, CD74, VNN1, IL2RA, CD27, NCKAP1L, TESPA1, TBX21, CCR2, CR1, ZNF683, CRTAM, CD28, HLA-DOA, FOXP3, CTLA4, JAK3, TNFRSF18, IRF1, IL7R, CCL19, ANXA1, FGL2, LAG3, TNFSF9	39	geneontology_Biological_Process	0.0681818	Up
GO:0019882	antigen processing and presentation	47/572	232/18866	1.51e-25	1.02e-23	7.41e-24	NCF1, VAMP8, WAS, HLA-E, NCF4, CTSS, CYBA, PSMB10, HLA-DMB, CYBB, LILRB2, FCGR1B, HLA-DMA, MARCHF1, FCER1G, FCGR1A, CLEC4A, CD74, HLA-DPB1, HLA-DRB1, HLA-DRA, PYCARD, NCF2, HLA-B, HLA-DPA1, CD8A, CCR7, LGMN, HLA-C, CD209, FCGR2B, HLA-DOA, HLA-DQA1, HLA-DRB5, CD68, HLA-DQB1, HLA-F, PSMB9, HLA-DQB2, CCL19, HLA-DOB, ICAM1, CD1C, HLA-DQA2, FGL2, LAG3, TREM2	47	geneontology_Biological_Process	0.0821678	Up
GO:0001906	cell killing	41/572	172/18866	2.61e-25	1.73e-23	1.26e-23	RIPK3, PTPN6, VAV1, IL18, HLA-E, CORO1A, IL12RB1, LILRB1, LGALS9, SYK, ITGAM, TYROBP, SLAMF6, HAVCR2, SH2D1A, PTPRC, PRF1, CTSC, CLEC7A, NCR3, SLAMF7, GZMM, HLA-B, XCL1, CRTAM, C3, FCGR2B, STXBP2, LYZ, CCL13, GZMB, APOL1, HLA-F, IL7R, GNLY, ICAM1, CD1C, CD55, LAG3, CFH, CTSG	41	geneontology_Biological_Process	0.0716783	Up
GO:0046631	alpha-beta T cell activation	38/572	146/18866	4.88e-25	3.18e-23	2.31e-23	SASH3, IL18, RASAL3, HLA-E, BATF, IL12RB1, LILRB1, LGALS9, SYK, DOCK2, NLRP3, SLAMF6, CD86, TNFSF8, CD3E, CD300A, PTPRC, ZAP70, VSIR, CLEC4A, SPN, EBI3, NCKAP1L, XCL1, TBX21, CCR2, ZNF683, CRTAM, CD28, FOXP3, EOMES, JAK3, PLA2G2D, IRF1, CCL19, ANXA1, IL6, CD55	38	geneontology_Biological_Process	0.0664336	Up
GO:0002819	regulation of adaptive immune response	40/572	168/18866	1.07e-24	6.84e-23	4.96e-23	RIPK3, PTPN6, SASH3, IL18, WAS, HLA-E, BTK, IL12RB1, LILRB1, CD4, SKAP1, TNFSF13B, SAMSN1, NLRP3, TNFRSF1B, HAVCR2, CD48, FCER1G, PTPRC, PYCARD, HLA-B, XCL1, TBX21, CCR2, CR1, C3, CD28, FCGR2B, CD40, FOXP3, JAK3, IRF1, HLA-F, IL7R, CCL19, CLEC4G, ANXA1, IL6, CD1C, IL20RB	40	geneontology_Biological_Process	0.0699301	Up
GO:0006909	phagocytosis	58/572	382/18866	1.68e-24	1.06e-22	7.71e-23	VAV1, BIN2, WAS, NCF4, HCK, IRF8, CORO1A, CYBA, ITGB2, AIF1, SYK, IL2RG, ITGAM, DOCK2, CD247, ITGAL, TYROBP, CD14, CD300A, FCER1G, FGR, ICAM3, MYO1G, PTPRC, FCGR1A, CD3G, MYO7A, SIRPG, RHOH, SLAMF1, RAC2, CLEC7A, TLR2, NCKAP1L, PYCARD, NCF2, CCR2, LYN, IL2RB, CD300LF, MSR1, FCGR3A, C3, P2RY6, FCGR2A, FCGR2B, RAB20, FCN1, C2, IL15RA, MARCO, CCL2, TLR4, IGLL5, ANXA1, PTX3, PLA2G5, TREM2	58	geneontology_Biological_Process	0.101399	Up
GO:0031349	positive regulation of defense response	58/572	385/18866	2.53e-24	1.57e-22	1.14e-22	VAV1, VAMP8, GPSM3, IL18, HLA-E, HCK, BTK, CYBA, PSMB10, SYK, CARD9, TLR8, SLAMF6, HAVCR2, IL16, FCER1G, SH2D1A, ICAM3, CTSC, CLEC4A, CLEC7A, CARD11, TLR2, NCR3, PYHIN1, CCL5, CLEC10A, CCL3, TLR7, PYCARD, CCR2, LYN, CD6, CCR7, S100A9, CRTAM, C3, GBP5, CD209, CD28, FCN1, MNDA, CLEC4E, HLA-F, LILRA5, PSMB9, PLA2G2A, TLR4, S100A8, IDO1, OSM, IL6, AIM2, LAG3, PLA2G5, TREM2, SERPINE1, FABP4	58	geneontology_Biological_Process	0.101399	Up
GO:0070664	negative regulation of leukocyte proliferation	30/572	86/18866	3.52e-24	2.16e-22	1.56e-22	PTPN6, LST1, BTK, INPP5D, LILRB1, LGALS9, LILRB2, TYROBP, CD86, HAVCR2, CD300A, VSIR, IL2RA, VSIG4, HLA-DRB1, SPN, CCL8, XCL1, LYN, CRTAM, FCGR2B, MNDA, FOXP3, CTLA4, PLA2G2D, IDO1, CLEC4G, PDCD1LG2, LRRC32, IL20RB	30	geneontology_Biological_Process	0.0524476	Up
GO:0050672	negative regulation of lymphocyte proliferation	29/572	79/18866	3.75e-24	2.26e-22	1.64e-22	PTPN6, LST1, BTK, INPP5D, LILRB1, LGALS9, LILRB2, TYROBP, CD86, HAVCR2, CD300A, VSIR, IL2RA, VSIG4, HLA-DRB1, SPN, XCL1, LYN, CRTAM, FCGR2B, MNDA, FOXP3, CTLA4, PLA2G2D, IDO1, CLEC4G, PDCD1LG2, LRRC32, IL20RB	29	geneontology_Biological_Process	0.0506993	Up
GO:0002706	regulation of lymphocyte mediated immunity	38/572	154/18866	4e-24	2.37e-22	1.72e-22	RIPK3, PTPN6, VAV1, SASH3, IL18, WAS, HLA-E, BTK, IL12RB1, LILRB1, LGALS9, NLRP3, SLAMF6, TNFRSF1B, HAVCR2, FCER1G, SH2D1A, CD96, PTPRC, NCR3, HLA-B, XCL1, TBX21, CCR2, CR1, CRTAM, C3, CD28, FCGR2B, CD40, FOXP3, HLA-F, IL7R, CLEC4G, IL6, CD1C, LAG3, IL20RB	38	geneontology_Biological_Process	0.0664336	Up
GO:0032945	negative regulation of mononuclear cell proliferation	29/572	80/18866	5.71e-24	3.34e-22	2.42e-22	PTPN6, LST1, BTK, INPP5D, LILRB1, LGALS9, LILRB2, TYROBP, CD86, HAVCR2, CD300A, VSIR, IL2RA, VSIG4, HLA-DRB1, SPN, XCL1, LYN, CRTAM, FCGR2B, MNDA, FOXP3, CTLA4, PLA2G2D, IDO1, CLEC4G, PDCD1LG2, LRRC32, IL20RB	29	geneontology_Biological_Process	0.0506993	Up
GO:0070098	chemokine-mediated signaling pathway	30/572	88/18866	7.71e-24	4.44e-22	3.22e-22	CXCR3, CCRL2, CCL4, CCR5, CCL5, CCR1, CXCR6, CCL3, CCL8, XCL2, XCL1, CCR2, CCL23, CCR7, CCL3L1, CXCL9, CXCL10, CXCL11, CMKLR1, CCL13, CXCL13, CCL2, CCL19, CCL17, CXCL1, ACKR1, CCL18, CXCL12, CCL26, TREM2	30	geneontology_Biological_Process	0.0524476	Up
GO:0050727	regulation of inflammatory response	60/572	425/18866	1.25e-23	6.96e-22	5.05e-22	VAMP8, GPSM3, IL18, HLA-E, TNFAIP8L2, HCK, BTK, AOAH, PIK3AP1, ALOX5, NLRP3, TNFRSF1B, IL16, FCER1G, CASP4, PTPRC, CTSC, CASP1, CD200R1, CLEC7A, TLR2, CCL5, IL2RA, CST7, HLA-DRB1, CCL3, TLR7, PYCARD, XCL1, CCR2, SLAMF8, LYN, CD6, CCR7, S100A9, C3, GBP5, CD28, FCGR2B, SIGLEC10, FOXP3, PLA2G2D, LILRA5, METRNL, PLA2G2A, TLR4, S100A8, IDO1, OSM, APOE, ANXA1, IL6, NT5E, IL20RB, TNFAIP6, TREM2, ACP5, S…	60	geneontology_Biological_Process	0.104895	Up
GO:0071674	mononuclear cell migration	31/572	97/18866	1.28e-23	6.96e-22	5.05e-22	JAML, AIF1, CSF1R, CCL4, C3AR1, CSF1, CCL5, CCR1, CCL3, CCL8, XCL2, XCL1, CCR2, SLAMF8, LYN, CCL23, LGMN, CCL3L1, CXCL10, CMKLR1, CCL13, CCL2, CCL19, CCL17, C5AR1, ANXA1, IL6, CCL18, CXCL12, CCL26, SERPINE1	31	geneontology_Biological_Process	0.0541958	Up
GO:1990868	response to chemokine	31/572	97/18866	1.28e-23	6.96e-22	5.05e-22	CXCR3, CCRL2, CCL4, DOCK8, CCR5, CCL5, CCR1, CXCR6, CCL3, CCL8, XCL2, XCL1, CCR2, CCL23, CCR7, CCL3L1, CXCL9, CXCL10, CXCL11, CMKLR1, CCL13, CXCL13, CCL2, CCL19, CCL17, CXCL1, ACKR1, CCL18, CXCL12, CCL26, TREM2	31	geneontology_Biological_Process	0.0541958	Up
GO:1990869	cellular response to chemokine	31/572	97/18866	1.28e-23	6.96e-22	5.05e-22	CXCR3, CCRL2, CCL4, DOCK8, CCR5, CCL5, CCR1, CXCR6, CCL3, CCL8, XCL2, XCL1, CCR2, CCL23, CCR7, CCL3L1, CXCL9, CXCL10, CXCL11, CMKLR1, CCL13, CXCL13, CCL2, CCL19, CCL17, CXCL1, ACKR1, CCL18, CXCL12, CCL26, TREM2	31	geneontology_Biological_Process	0.0541958	Up
GO:0002687	positive regulation of leukocyte migration	36/572	142/18866	2.36e-23	1.27e-21	9.2e-22	GPSM3, PTAFR, LGALS9, AIF1, CSF1R, CCL4, DOCK8, C3AR1, CSF1, RAC2, CD74, CCL5, CCR1, SPN, NCKAP1L, CCL3, CCL8, XCL2, PYCARD, XCL1, CCR2, CCR7, LGMN, CXCL10, CMKLR1, TNFRSF18, CXCL13, CCL19, C5AR1, ICAM1, IL6, CXCL12, TREM2, SERPINE1, VEGFD, CXCL14	36	geneontology_Biological_Process	0.0629371	Up
GO:0001909	leukocyte mediated cytotoxicity	32/572	108/18866	3.45e-23	1.82e-21	1.32e-21	RIPK3, PTPN6, VAV1, IL18, HLA-E, CORO1A, IL12RB1, LILRB1, LGALS9, ITGAM, TYROBP, SLAMF6, HAVCR2, SH2D1A, PTPRC, PRF1, CTSC, NCR3, SLAMF7, GZMM, HLA-B, XCL1, CRTAM, FCGR2B, STXBP2, GZMB, HLA-F, IL7R, ICAM1, CD1C, LAG3, CTSG	32	geneontology_Biological_Process	0.0559441	Up
GO:0032609	interferon-gamma production	32/572	115/18866	2.99e-22	1.56e-20	1.13e-20	RIPK3, SASH3, IL18, IRF8, IL12RB1, LILRB1, LGALS9, TLR8, CD2, SLAMF6, CD14, HAVCR2, CD3E, CD96, VSIR, CLEC7A, HLA-DPB1, HLA-DRB1, SPN, EBI3, TLR7, PYCARD, XCL1, CCR2, HLA-DPA1, CCR7, CRTAM, FOXP3, EOMES, TLR4, PDCD1LG2, IL20RB	32	geneontology_Biological_Process	0.0559441	Up
GO:0050868	negative regulation of T cell activation	32/572	118/18866	7.16e-22	3.69e-20	2.68e-20	PTPN6, TNFAIP8L2, LILRB1, LGALS9, LILRB2, CD86, HAVCR2, CD300A, TIGIT, VSIR, CD74, IL2RA, VSIG4, HLA-DRB1, SPN, XCL1, TBX21, CRTAM, FCGR2B, FOXP3, CTLA4, JAK3, PLA2G2D, IRF1, IDO1, CLEC4G, ANXA1, PDCD1LG2, FGL2, LRRC32, LAG3, IL20RB	32	geneontology_Biological_Process	0.0559441	Up
GO:0071216	cellular response to biotic stimulus	44/572	246/18866	1.07e-21	5.44e-20	3.95e-20	PTAFR, IL18, HCK, BTK, IRF8, LILRB1, SCIMP, SYK, LILRB2, LY86, CD180, NLRP3, CD86, CD14, TNFRSF1B, HAVCR2, CCR5, CASP1, CLEC7A, TLR2, CCL5, CCL3, PYCARD, LYN, CD6, MRC1, FCGR2B, CXCL9, CD40, CXCL10, CD68, CXCL11, CXCL13, CCL2, TLR4, CXCL1, ICAM1, IL6, TFPI, PDCD1LG2, CD55, TREM2, CTSG, SERPINE1	44	geneontology_Biological_Process	0.0769231	Up
GO:0006959	humoral immune response	54/572	377/18866	1.2e-21	5.98e-20	4.34e-20	PTPN6, HLA-E, PSMB10, ALOX5, C1QA, C1QC, RNASE6, SH2D1A, C1QB, C3AR1, PTPRC, CFP, VSIG4, HLA-DRB1, EBI3, CCR2, CCR7, CR1, S100A9, C3, SERPING1, CD28, FCGR2B, PDCD1, CXCL9, JCHAIN, LYZ, FCN1, CXCL10, CFD, CXCL11, C2, CCL13, HLA-DQB1, C1S, CXCL13, GNLY, C1R, CCL2, PLA2G2A, IGLL5, S100A8, C5AR1, CXCL1, IL6, CFB, CD55, CFH, TREM2, CTSG, SLPI, PI3, DEFB1, CXCL14	54	geneontology_Biological_Process	0.0944056	Up
GO:0002704	negative regulation of leukocyte mediated immunity	23/572	52/18866	1.21e-21	5.98e-20	4.34e-20	PTPN6, HLA-E, LILRB1, LGALS9, HAVCR2, CD300A, CD96, PTPRC, CD84, HLA-B, XCL1, TBX21, CCR2, CR1, FCGR2B, FOXP3, JAK3, HLA-F, IL7R, CLEC4G, BST2, HMOX1, IL20RB	23	geneontology_Biological_Process	0.0402098	Up
GO:0050777	negative regulation of immune response	36/572	159/18866	1.51e-21	7.39e-20	5.37e-20	PTPN6, HLA-E, INPP5D, LILRB1, LGALS9, SAMSN1, HAVCR2, CD300A, CD96, PTPRC, CD84, IL2RA, VSIG4, HLA-DRB1, HLA-B, XCL1, TBX21, CCR2, SLAMF8, LYN, CR1, SERPING1, FCGR2B, PDCD1, FOXP3, CTLA4, JAK3, HLA-F, IL7R, CLEC4G, BST2, ANXA1, HMOX1, CD55, FGL2, IL20RB	36	geneontology_Biological_Process	0.0629371	Up
GO:0050851	antigen receptor-mediated signaling pathway	50/572	325/18866	1.69e-21	8.18e-20	5.93e-20	PTPN6, LCP2, WAS, BTK, FYB1, LILRB4, INPP5D, CD4, PSMB10, SYK, CD3D, LCK, SKAP1, LAT2, CD247, CD3E, SLA2, CD300A, SH2D1A, NFAM1, PTPRC, UBASH3A, CD3G, ZAP70, CARD11, CD38, HLA-DPB1, THEMIS2, HLA-DRB1, NCKAP1L, HLA-DRA, TESPA1, LYN, HLA-DPA1, CCR7, PIK3CD, CD28, FCGR2B, MNDA, FOXP3, HLA-DQA1, CTLA4, HLA-DRB5, HLA-DQB1, CD79A, PSMB9, HLA-DQB2, IGLL5, CD79B, HLA-DQA2	50	geneontology_Biological_Process	0.0874126	Up
GO:0002456	T cell mediated immunity	30/572	104/18866	1.94e-21	9.13e-20	6.63e-20	RIPK3, SASH3, IL18, WAS, HLA-E, IL12RB1, LILRB1, NLRP3, TNFRSF1B, MYO1G, PTPRC, PRF1, CTSC, GZMM, HLA-B, XCL1, TBX21, CCR2, CD8A, FCGR2B, FOXP3, HLA-F, IL7R, CLEC4G, ICAM1, IL6, CD1C, CD55, IL20RB, CD70	30	geneontology_Biological_Process	0.0524476	Up
GO:0032649	regulation of interferon-gamma production	30/572	104/18866	1.94e-21	9.13e-20	6.63e-20	RIPK3, SASH3, IL18, IRF8, IL12RB1, LILRB1, LGALS9, TLR8, CD2, SLAMF6, CD14, HAVCR2, CD3E, CD96, VSIR, CLEC7A, HLA-DPB1, HLA-DRB1, EBI3, TLR7, PYCARD, XCL1, CCR2, HLA-DPA1, CCR7, CRTAM, FOXP3, TLR4, PDCD1LG2, IL20RB	30	geneontology_Biological_Process	0.0524476	Up
GO:0032653	regulation of interleukin-10 production	24/572	60/18866	2.95e-21	1.37e-19	9.93e-20	SASH3, LILRB1, LGALS9, SYK, TYROBP, FCER1G, TIGIT, VSIR, CLEC7A, TLR2, HLA-DRB1, PYCARD, XCL1, CD28, FCGR2B, FOXP3, JAK3, LILRA5, TLR4, IDO1, IL6, PDCD1LG2, IL20RB, TREM2	24	geneontology_Biological_Process	0.041958	Up
GO:0046634	regulation of alpha-beta T cell activation	29/572	97/18866	2.97e-21	1.37e-19	9.93e-20	SASH3, IL18, RASAL3, HLA-E, IL12RB1, LILRB1, LGALS9, SYK, NLRP3, CD86, CD3E, CD300A, PTPRC, ZAP70, VSIR, EBI3, NCKAP1L, XCL1, TBX21, CCR2, ZNF683, CRTAM, CD28, FOXP3, JAK3, IRF1, CCL19, ANXA1, CD55	29	geneontology_Biological_Process	0.0506993	Up
GO:0002548	monocyte chemotaxis	25/572	67/18866	3.36e-21	1.51e-19	1.1e-19	AIF1, CCL4, CCL5, CCR1, CCL3, CCL8, XCL2, XCL1, CCR2, SLAMF8, LYN, CCL23, LGMN, CCL3L1, CXCL10, CCL13, CCL2, CCL19, CCL17, ANXA1, IL6, CCL18, CXCL12, CCL26, SERPINE1	25	geneontology_Biological_Process	0.0437063	Up
GO:0072678	T cell migration	25/572	67/18866	3.36e-21	1.51e-19	1.1e-19	RIPK3, AIF1, CXCR3, ITGAL, MYO1G, DOCK8, ZAP70, CD200R1, CCL5, SPN, CCL3, XCL2, PYCARD, XCL1, CCR2, CXCL16, PIK3CD, CXCL10, CXCL11, CXCL13, CCL2, ICAM1, CXCL12, CCL26, ECM1	25	geneontology_Biological_Process	0.0437063	Up
GO:0002822	regulation of adaptive immune response based on somatic recombination of immune receptors built from immunoglobulin superfamily domains	35/572	153/18866	3.86e-21	1.72e-19	1.25e-19	RIPK3, PTPN6, SASH3, IL18, WAS, HLA-E, BTK, IL12RB1, LILRB1, CD4, TNFSF13B, NLRP3, TNFRSF1B, HAVCR2, FCER1G, PTPRC, HLA-B, XCL1, TBX21, CCR2, CR1, C3, CD28, FCGR2B, CD40, FOXP3, JAK3, HLA-F, IL7R, CCL19, CLEC4G, ANXA1, IL6, CD1C, IL20RB	35	geneontology_Biological_Process	0.0611888	Up
GO:0032655	regulation of interleukin-12 production	23/572	55/18866	5.86e-21	2.58e-19	1.87e-19	IRF8, LILRB1, LGALS9, SCIMP, LTB, SYK, TLR8, IL16, TIGIT, SLAMF1, CLEC7A, TLR2, IRF5, HLA-B, CCR7, CD40, JAK3, CMKLR1, LILRA5, TLR4, CCL19, IDO1, ACP5	23	geneontology_Biological_Process	0.0402098	Up
GO:0071219	cellular response to molecule of bacterial origin	41/572	222/18866	7.83e-21	3.41e-19	2.47e-19	PTAFR, IL18, HCK, IRF8, LILRB1, SCIMP, LILRB2, LY86, CD180, NLRP3, CD86, CD14, TNFRSF1B, HAVCR2, CCR5, CASP1, TLR2, CCL5, CCL3, PYCARD, LYN, CD6, MRC1, FCGR2B, CXCL9, CD40, CXCL10, CD68, CXCL11, CXCL13, CCL2, TLR4, CXCL1, ICAM1, IL6, TFPI, PDCD1LG2, CD55, TREM2, CTSG, SERPINE1	41	geneontology_Biological_Process	0.0716783	Up
GO:1903038	negative regulation of leukocyte cell-cell adhesion	33/572	137/18866	9.43e-21	4.06e-19	2.95e-19	PTPN6, TNFAIP8L2, LILRB1, LGALS9, LILRB2, CD86, HAVCR2, CD300A, TIGIT, VSIR, CD74, IL2RA, VSIG4, HLA-DRB1, SPN, XCL1, TBX21, CRTAM, FCGR2B, FOXP3, CTLA4, JAK3, PLA2G2D, IRF1, IDO1, CLEC4G, ANXA1, PDCD1LG2, FGL2, LRRC32, CXCL12, LAG3, IL20RB	33	geneontology_Biological_Process	0.0576923	Up
GO:0032613	interleukin-10 production	24/572	63/18866	1.18e-20	5e-19	3.63e-19	SASH3, LILRB1, LGALS9, SYK, TYROBP, FCER1G, TIGIT, VSIR, CLEC7A, TLR2, HLA-DRB1, PYCARD, XCL1, CD28, FCGR2B, FOXP3, JAK3, LILRA5, TLR4, IDO1, IL6, PDCD1LG2, IL20RB, TREM2	24	geneontology_Biological_Process	0.041958	Up
GO:0032615	interleukin-12 production	23/572	57/18866	1.58e-20	6.64e-19	4.82e-19	IRF8, LILRB1, LGALS9, SCIMP, LTB, SYK, TLR8, IL16, TIGIT, SLAMF1, CLEC7A, TLR2, IRF5, HLA-B, CCR7, CD40, JAK3, CMKLR1, LILRA5, TLR4, CCL19, IDO1, ACP5	23	geneontology_Biological_Process	0.0402098	Up
GO:0048002	antigen processing and presentation of peptide antigen	38/572	194/18866	2.53e-20	1.06e-18	7.66e-19	NCF1, VAMP8, HLA-E, NCF4, CTSS, CYBA, PSMB10, HLA-DMB, CYBB, FCGR1B, HLA-DMA, MARCHF1, FCER1G, FCGR1A, CLEC4A, CD74, HLA-DPB1, HLA-DRB1, HLA-DRA, PYCARD, NCF2, HLA-B, HLA-DPA1, LGMN, HLA-C, CD209, FCGR2B, HLA-DOA, HLA-DQA1, HLA-DRB5, HLA-DQB1, HLA-F, PSMB9, HLA-DQB2, HLA-DOB, HLA-DQA2, LAG3, TREM2	38	geneontology_Biological_Process	0.0664336	Up
GO:0002690	positive regulation of leukocyte chemotaxis	28/572	96/18866	3.07e-20	1.27e-18	9.19e-19	GPSM3, LGALS9, AIF1, CSF1R, CCL4, C3AR1, CSF1, RAC2, CD74, CCL5, CCR1, NCKAP1L, CCL3, XCL2, XCL1, CCR2, CCR7, LGMN, CXCL10, CMKLR1, CXCL13, CCL19, C5AR1, IL6, CXCL12, SERPINE1, VEGFD, CXCL14	28	geneontology_Biological_Process	0.048951	Up
GO:0071222	cellular response to lipopolysaccharide	39/572	208/18866	4.08e-20	1.66e-18	1.21e-18	PTAFR, IL18, HCK, IRF8, LILRB1, SCIMP, LILRB2, LY86, CD180, NLRP3, CD86, CD14, TNFRSF1B, HAVCR2, CCR5, CASP1, TLR2, CCL5, CCL3, PYCARD, LYN, CD6, MRC1, CXCL9, CD40, CXCL10, CD68, CXCL11, CXCL13, CCL2, TLR4, CXCL1, ICAM1, IL6, TFPI, PDCD1LG2, CD55, CTSG, SERPINE1	39	geneontology_Biological_Process	0.0681818	Up
GO:0002688	regulation of leukocyte chemotaxis	31/572	124/18866	4.4e-20	1.77e-18	1.29e-18	GPSM3, LGALS9, AIF1, CSF1R, CCL4, C3AR1, CSF1, RAC2, CD74, CCL5, CCR1, NCKAP1L, CCL3, XCL2, XCL1, CCR2, SLAMF8, LYN, CCR7, LGMN, CXCL10, CMKLR1, CXCL13, CCL2, CCL19, C5AR1, IL6, CXCL12, SERPINE1, VEGFD, CXCL14	31	geneontology_Biological_Process	0.0541958	Up
GO:0002831	regulation of response to biotic stimulus	54/572	409/18866	5.57e-20	2.22e-18	1.61e-18	PTPN6, VAV1, HLA-E, HCK, IL12RB1, LILRB1, LGALS9, CYBA, SCIMP, PSMB10, SYK, CARD9, TLR8, LY86, CD180, SLAMF6, HAVCR2, FCER1G, FGR, SH2D1A, ICAM3, CD96, CLEC4A, CARD11, NCR3, PYHIN1, CCL5, CLEC10A, IL2RA, VSIG4, PYCARD, HLA-B, SLAMF8, LYN, CR1, CRTAM, SERPING1, GBP5, CD209, FCGR2B, FCN1, MNDA, CLEC4E, IRF1, HLA-F, PSMB9, TLR4, APOE, AIM2, CD55, FGL2, LAG3, PLA2G5, TREM2	54	geneontology_Biological_Process	0.0944056	Up
GO:0002285	lymphocyte activation involved in immune response	37/572	187/18866	5.64e-20	2.23e-18	1.62e-18	IL18, BATF, CORO1A, IL12RB1, MFNG, LILRB1, LGALS9, HLA-DMB, ITGAL, CD180, NLRP3, SLAMF6, CD86, HAVCR2, APBB1IP, FCER1G, PTPRC, CD74, SPN, TBX21, LCP1, ZNF683, CD28, FCGR2B, CD40, FOXP3, CLEC4E, EOMES, JAK3, HLA-F, TLR4, CCL19, ICAM1, ANXA1, IL6, CD1C, FGL2	37	geneontology_Biological_Process	0.0646853	Up
GO:0031341	regulation of cell killing	27/572	92/18866	1.22e-19	4.78e-18	3.47e-18	RIPK3, VAV1, HLA-E, IL12RB1, LILRB1, LGALS9, SYK, ITGAM, TYROBP, SLAMF6, HAVCR2, SH2D1A, PTPRC, PRF1, CLEC7A, NCR3, HLA-B, XCL1, CRTAM, FCGR2B, HLA-F, IL7R, ICAM1, CD1C, CD55, LAG3, CFH	27	geneontology_Biological_Process	0.0472028	Up
GO:0002705	positive regulation of leukocyte mediated immunity	32/572	138/18866	1.27e-19	4.92e-18	3.57e-18	VAV1, VAMP8, SASH3, PTAFR, IL18, HLA-E, BTK, IL12RB1, ITGB2, SCIMP, SYK, ITGAM, TYROBP, NLRP3, SLAMF6, FCER1G, FGR, SH2D1A, PTPRC, NCR3, HLA-B, XCL1, TBX21, CRTAM, C3, CD28, CD40, FOXP3, HLA-F, IL6, CD1C, LAG3	32	geneontology_Biological_Process	0.0559441	Up
GO:1902107	positive regulation of leukocyte differentiation	34/572	159/18866	1.41e-19	5.43e-18	3.94e-18	SASH3, IL18, BTK, LILRB4, INPP5D, IL12RB1, LGALS9, CD4, SYK, HCLS1, LILRB2, EVI2B, TYROBP, NLRP3, CD86, PTPRC, CSF1, RHOH, ZAP70, VSIR, CD74, CCR1, VNN1, IL2RA, CD27, HLA-DRB1, NCKAP1L, TESPA1, FOXP3, IL7R, CCL19, ANXA1, TNFSF9, TREM2	34	geneontology_Biological_Process	0.0594406	Up
GO:0045088	regulation of innate immune response	46/572	307/18866	2.19e-19	8.34e-18	6.05e-18	PTPN6, VAV1, HLA-E, HCK, LILRB1, LGALS9, PSMB10, SYK, CARD9, TLR8, SLAMF6, HAVCR2, FCER1G, FGR, SH2D1A, ICAM3, CD96, CLEC4A, CARD11, NCR3, PYHIN1, CCL5, CLEC10A, VSIG4, PYCARD, HLA-B, SLAMF8, LYN, CR1, CRTAM, SERPING1, GBP5, CD209, FCGR2B, FCN1, MNDA, CLEC4E, IRF1, HLA-F, PSMB9, TLR4, APOE, AIM2, LAG3, PLA2G5, TREM2	46	geneontology_Biological_Process	0.0804196	Up
GO:0050852	T cell receptor signaling pathway	38/572	206/18866	2.25e-19	8.48e-18	6.16e-18	PTPN6, LCP2, WAS, FYB1, LILRB4, INPP5D, CD4, PSMB10, CD3D, LCK, SKAP1, CD247, CD3E, SLA2, CD300A, SH2D1A, PTPRC, UBASH3A, CD3G, ZAP70, CARD11, HLA-DPB1, THEMIS2, HLA-DRB1, HLA-DRA, TESPA1, HLA-DPA1, CCR7, PIK3CD, CD28, FOXP3, HLA-DQA1, CTLA4, HLA-DRB5, HLA-DQB1, PSMB9, HLA-DQB2, HLA-DQA2	38	geneontology_Biological_Process	0.0664336	Up
GO:0002698	negative regulation of immune effector process	30/572	124/18866	4.89e-19	1.82e-17	1.32e-17	PTPN6, HLA-E, LILRB1, LGALS9, HAVCR2, CD300A, CD96, PTPRC, CD84, IL2RA, VSIG4, HLA-B, XCL1, TBX21, CCR2, SLAMF8, CR1, SERPING1, FCGR2B, FOXP3, JAK3, HLA-F, IL7R, CLEC4G, BST2, ANXA1, HMOX1, CD55, FGL2, IL20RB	30	geneontology_Biological_Process	0.0524476	Up
GO:0048247	lymphocyte chemotaxis	23/572	65/18866	5.37e-19	1.99e-17	1.44e-17	CXCR3, CCL4, CCL5, CCL3, CCL8, XCL2, XCL1, CCR2, CCL23, CXCL16, PIK3CD, CCL3L1, CXCL10, CXCL11, CCL13, CXCL13, CCL2, CCL19, CCL17, HSD3B7, CCL18, CCL26, CXCL14	23	geneontology_Biological_Process	0.0402098	Up
GO:0002286	T cell activation involved in immune response	28/572	109/18866	1.32e-18	4.85e-17	3.52e-17	IL18, BATF, IL12RB1, LILRB1, LGALS9, HLA-DMB, ITGAL, NLRP3, SLAMF6, CD86, HAVCR2, APBB1IP, FCER1G, CD74, SPN, TBX21, LCP1, FCGR2B, FOXP3, CLEC4E, EOMES, JAK3, CCL19, ICAM1, ANXA1, IL6, CD1C, FGL2	28	geneontology_Biological_Process	0.048951	Up
GO:0019884	antigen processing and presentation of exogenous antigen	35/572	185/18866	2.64e-18	9.56e-17	6.94e-17	NCF1, VAMP8, HLA-E, NCF4, CTSS, CYBA, PSMB10, HLA-DMB, CYBB, FCGR1B, HLA-DMA, FCER1G, FCGR1A, CLEC4A, CD74, HLA-DPB1, HLA-DRB1, HLA-DRA, NCF2, HLA-B, HLA-DPA1, LGMN, HLA-C, FCGR2B, HLA-DOA, HLA-DQA1, HLA-DRB5, HLA-DQB1, HLA-F, PSMB9, HLA-DQB2, HLA-DOB, CD1C, HLA-DQA2, LAG3	35	geneontology_Biological_Process	0.0611888	Up
GO:0042113	B cell activation	46/572	328/18866	3.24e-18	1.17e-16	8.46e-17	PTPN6, SASH3, BATF, BTK, INPP5D, MFNG, SYK, TNFSF13B, LAT2, CD180, TYROBP, SAMSN1, CD86, CD300A, NFAM1, TBC1D10C, PTPRC, ZAP70, LYL1, CARD11, CD74, IKZF3, CD38, CD27, NCKAP1L, TBX21, SLAMF8, LYN, PIK3CD, CD28, FCGR2B, CD40, MNDA, FOXP3, MZB1, CTLA4, CMTM7, JAK3, IL7R, CD79A, TLR4, IGLL5, CD79B, BST2, IL6, CD70	46	geneontology_Biological_Process	0.0804196	Up
GO:0050921	positive regulation of chemotaxis	31/572	144/18866	4.77e-18	1.7e-16	1.23e-16	GPSM3, LGALS9, AIF1, CSF1R, IL16, CCL4, C3AR1, CSF1, RAC2, CD74, CCL5, CCR1, NCKAP1L, CCL3, XCL2, XCL1, CCR2, CCR7, LGMN, CXCL10, CMKLR1, CXCL13, CCL19, C5AR1, IL6, CXCL12, CCL26, TREM2, SERPINE1, VEGFD, CXCL14	31	geneontology_Biological_Process	0.0541958	Up
GO:0002478	antigen processing and presentation of exogenous peptide antigen	34/572	177/18866	4.94e-18	1.74e-16	1.27e-16	NCF1, VAMP8, HLA-E, NCF4, CTSS, CYBA, PSMB10, HLA-DMB, CYBB, FCGR1B, HLA-DMA, FCER1G, FCGR1A, CLEC4A, CD74, HLA-DPB1, HLA-DRB1, HLA-DRA, NCF2, HLA-B, HLA-DPA1, LGMN, HLA-C, FCGR2B, HLA-DOA, HLA-DQA1, HLA-DRB5, HLA-DQB1, HLA-F, PSMB9, HLA-DQB2, HLA-DOB, HLA-DQA2, LAG3	34	geneontology_Biological_Process	0.0594406	Up
GO:0071887	leukocyte apoptotic process	27/572	108/18866	1.17e-17	4.11e-16	2.98e-16	RIPK3, BTK, LILRB1, LGALS9, HCLS1, GIMAP8, FCER1G, DOCK8, CCR5, CD3G, CD74, CCL5, IL2RA, HSH2D, CD27, FASLG, LYN, CCR7, PIK3CD, PDCD1, JAK3, IL7R, CCL19, IDO1, ANXA1, IL6, CXCL12	27	geneontology_Biological_Process	0.0472028	Up
GO:0060333	interferon-gamma-mediated signaling pathway	25/572	91/18866	1.63e-17	5.64e-16	4.09e-16	PTAFR, HLA-E, HCK, IRF8, FCGR1B, FCGR1A, HLA-DPB1, HLA-DRB1, IRF5, HLA-DRA, HLA-B, HLA-DPA1, HLA-C, HLA-DQA1, HLA-DRB5, CIITA, HLA-DQB1, IRF1, HLA-F, HLA-DQB2, OAS1, ICAM1, HLA-DQA2, OASL, MT2A	25	geneontology_Biological_Process	0.0437063	Up
GO:2000106	regulation of leukocyte apoptotic process	24/572	86/18866	4.86e-17	1.67e-15	1.21e-15	RIPK3, BTK, LILRB1, LGALS9, HCLS1, GIMAP8, FCER1G, DOCK8, CCR5, CD3G, CD74, CCL5, HSH2D, CD27, LYN, CCR7, PIK3CD, PDCD1, JAK3, IL7R, CCL19, IDO1, ANXA1, CXCL12	24	geneontology_Biological_Process	0.041958	Up
GO:0070374	positive regulation of ERK1 and ERK2 cascade	36/572	215/18866	5.33e-17	1.82e-15	1.32e-15	LGALS9, CD4, SCIMP, CSF1R, HAVCR2, CCL4, PTPRC, SLAMF1, CD74, CCL5, CCR1, HLA-DRB1, CCL3, CCL8, XCL2, PYCARD, XCL1, CCL23, CCR7, P2RY6, CCL3L1, CCL13, MARCO, CCL2, PLA2G2A, TLR4, CCL19, CCL17, C5AR1, RAMP3, ICAM1, APOE, CCL18, CCL26, PLA2G5, TREM2	36	geneontology_Biological_Process	0.0629371	Up
GO:0045621	positive regulation of lymphocyte differentiation	26/572	105/18866	6.12e-17	2.07e-15	1.5e-15	SASH3, IL18, BTK, LILRB4, INPP5D, IL12RB1, LGALS9, SYK, LILRB2, NLRP3, CD86, PTPRC, RHOH, ZAP70, VSIR, CD74, VNN1, IL2RA, CD27, NCKAP1L, TESPA1, FOXP3, IL7R, CCL19, ANXA1, TNFSF9	26	geneontology_Biological_Process	0.0454545	Up
GO:0046635	positive regulation of alpha-beta T cell activation	21/572	63/18866	7.66e-17	2.57e-15	1.86e-15	SASH3, IL18, RASAL3, HLA-E, IL12RB1, LGALS9, SYK, NLRP3, CD86, CD3E, PTPRC, ZAP70, EBI3, NCKAP1L, XCL1, CCR2, CD28, FOXP3, CCL19, ANXA1, CD55	21	geneontology_Biological_Process	0.0367133	Up
GO:0045058	T cell selection	19/572	49/18866	8.56e-17	2.84e-15	2.06e-15	BATF, IL12RB1, CD4, SYK, DOCK2, CD3D, SLAMF6, CD3E, PTPRC, CD3G, ZAP70, CARD11, CD74, SPN, TBX21, CCR7, CD28, FOXP3, IL6	19	geneontology_Biological_Process	0.0332168	Up
GO:0042130	negative regulation of T cell proliferation	21/572	64/18866	1.11e-16	3.65e-15	2.65e-15	PTPN6, LILRB1, LGALS9, LILRB2, CD86, HAVCR2, VSIR, IL2RA, VSIG4, HLA-DRB1, SPN, XCL1, CRTAM, FOXP3, CTLA4, PLA2G2D, IDO1, CLEC4G, PDCD1LG2, LRRC32, IL20RB	21	geneontology_Biological_Process	0.0367133	Up
GO:0002709	regulation of T cell mediated immunity	22/572	73/18866	1.61e-16	5.26e-15	3.82e-15	RIPK3, SASH3, IL18, WAS, HLA-E, IL12RB1, LILRB1, NLRP3, TNFRSF1B, PTPRC, HLA-B, XCL1, TBX21, CCR2, FCGR2B, FOXP3, HLA-F, IL7R, CLEC4G, IL6, CD1C, IL20RB	22	geneontology_Biological_Process	0.0384615	Up
GO:0002886	regulation of myeloid leukocyte mediated immunity	20/572	58/18866	1.96e-16	6.35e-15	4.61e-15	VAMP8, PTAFR, HLA-E, BTK, LGALS9, ITGB2, SYK, ITGAM, TYROBP, CD300A, FCER1G, FGR, CD84, RAC2, CCR2, LYN, C3, FCGR2B, STXBP2, HMOX1	20	geneontology_Biological_Process	0.034965	Up
GO:0045582	positive regulation of T cell differentiation	24/572	92/18866	2.67e-16	8.57e-15	6.22e-15	SASH3, IL18, LILRB4, IL12RB1, LGALS9, SYK, LILRB2, NLRP3, CD86, PTPRC, RHOH, ZAP70, VSIR, CD74, VNN1, IL2RA, CD27, NCKAP1L, TESPA1, FOXP3, IL7R, CCL19, ANXA1, TNFSF9	24	geneontology_Biological_Process	0.041958	Up
GO:0001910	regulation of leukocyte mediated cytotoxicity	22/572	75/18866	3.07e-16	9.76e-15	7.09e-15	RIPK3, VAV1, HLA-E, IL12RB1, LILRB1, LGALS9, ITGAM, TYROBP, SLAMF6, HAVCR2, SH2D1A, PTPRC, NCR3, HLA-B, XCL1, CRTAM, FCGR2B, HLA-F, IL7R, ICAM1, CD1C, LAG3	22	geneontology_Biological_Process	0.0384615	Up
GO:0022408	negative regulation of cell-cell adhesion	33/572	191/18866	4.2e-16	1.33e-14	9.63e-15	PTPN6, TNFAIP8L2, LILRB1, LGALS9, LILRB2, CD86, HAVCR2, CD300A, TIGIT, VSIR, CD74, IL2RA, VSIG4, HLA-DRB1, SPN, XCL1, TBX21, CRTAM, FCGR2B, FOXP3, CTLA4, JAK3, PLA2G2D, IRF1, IDO1, CLEC4G, ANXA1, PDCD1LG2, FGL2, LRRC32, CXCL12, LAG3, IL20RB	33	geneontology_Biological_Process	0.0576923	Up
GO:1903708	positive regulation of hemopoiesis	34/572	204/18866	4.63e-16	1.45e-14	1.05e-14	SASH3, IL18, BTK, LILRB4, INPP5D, IL12RB1, LGALS9, CD4, SYK, HCLS1, LILRB2, EVI2B, TYROBP, NLRP3, CD86, PTPRC, CSF1, RHOH, ZAP70, VSIR, CD74, CCR1, VNN1, IL2RA, CD27, HLA-DRB1, NCKAP1L, TESPA1, FOXP3, IL7R, CCL19, ANXA1, TNFSF9, TREM2	34	geneontology_Biological_Process	0.0594406	Up
GO:0050764	regulation of phagocytosis	24/572	97/18866	9.94e-16	3.09e-14	2.24e-14	HCK, CYBA, SYK, IL2RG, DOCK2, CD300A, FCER1G, FGR, PTPRC, SIRPG, CLEC7A, TLR2, NCKAP1L, PYCARD, IL2RB, CD300LF, C3, FCGR2B, C2, IL15RA, CCL2, PTX3, PLA2G5, TREM2	24	geneontology_Biological_Process	0.041958	Up
GO:0002707	negative regulation of lymphocyte mediated immunity	17/572	42/18866	1.54e-15	4.75e-14	3.45e-14	PTPN6, HLA-E, LILRB1, LGALS9, HAVCR2, CD96, PTPRC, HLA-B, XCL1, TBX21, CR1, FCGR2B, FOXP3, HLA-F, IL7R, CLEC4G, IL20RB	17	geneontology_Biological_Process	0.0297203	Up
GO:0046633	alpha-beta T cell proliferation	16/572	36/18866	1.73e-15	5.29e-14	3.84e-14	IL18, RASAL3, HLA-E, LGALS9, SYK, DOCK2, CD3E, PTPRC, ZAP70, VSIR, EBI3, XCL1, CCR2, CD28, IRF1, CD55	16	geneontology_Biological_Process	0.027972	Up
GO:0002821	positive regulation of adaptive immune response	25/572	110/18866	2.16e-15	6.55e-14	4.75e-14	SASH3, IL18, HLA-E, BTK, IL12RB1, CD4, SKAP1, TNFSF13B, NLRP3, FCER1G, PTPRC, PYCARD, HLA-B, XCL1, TBX21, CCR2, C3, CD28, CD40, FOXP3, HLA-F, CCL19, ANXA1, IL6, CD1C	25	geneontology_Biological_Process	0.0437063	Up
GO:0032729	positive regulation of interferon-gamma production	20/572	65/18866	2.47e-15	7.44e-14	5.4e-14	SASH3, IL18, IRF8, IL12RB1, LGALS9, TLR8, CD2, SLAMF6, CD14, HAVCR2, CD3E, CLEC7A, HLA-DPB1, EBI3, TLR7, PYCARD, CCR2, HLA-DPA1, CRTAM, TLR4	20	geneontology_Biological_Process	0.034965	Up
GO:0046641	positive regulation of alpha-beta T cell proliferation	13/572	21/18866	2.61e-15	7.79e-14	5.65e-14	IL18, RASAL3, HLA-E, LGALS9, SYK, CD3E, PTPRC, ZAP70, EBI3, XCL1, CCR2, CD28, CD55	13	geneontology_Biological_Process	0.0227273	Up
GO:0050729	positive regulation of inflammatory response	29/572	158/18866	5.07e-15	1.5e-13	1.09e-13	VAMP8, GPSM3, IL18, HLA-E, BTK, IL16, FCER1G, CTSC, CLEC7A, TLR2, CCL3, TLR7, CCR2, CD6, CCR7, S100A9, C3, GBP5, CD28, LILRA5, PLA2G2A, TLR4, S100A8, IDO1, OSM, IL6, TREM2, SERPINE1, FABP4	29	geneontology_Biological_Process	0.0506993	Up
GO:0070372	regulation of ERK1 and ERK2 cascade	40/572	306/18866	6.25e-15	1.84e-13	1.33e-13	PTPN6, LGALS9, CD4, SCIMP, SYK, CSF1R, HAVCR2, CCL4, TBC1D10C, PTPRC, SLAMF1, CD74, CCL5, CCR1, HLA-DRB1, CCL3, CCL8, XCL2, PYCARD, XCL1, LYN, CCL23, CCR7, P2RY6, CCL3L1, CCL13, MARCO, CCL2, PLA2G2A, TLR4, CCL19, CCL17, C5AR1, RAMP3, ICAM1, APOE, CCL18, CCL26, PLA2G5, TREM2	40	geneontology_Biological_Process	0.0699301	Up
GO:0002833	positive regulation of response to biotic stimulus	36/572	251/18866	8.12e-15	2.37e-13	1.72e-13	VAV1, HLA-E, HCK, CYBA, SCIMP, PSMB10, SYK, CARD9, TLR8, LY86, CD180, SLAMF6, HAVCR2, FCER1G, SH2D1A, ICAM3, CLEC4A, CARD11, NCR3, PYHIN1, CCL5, CLEC10A, PYCARD, LYN, CRTAM, GBP5, CD209, FCN1, MNDA, CLEC4E, HLA-F, PSMB9, TLR4, AIM2, LAG3, PLA2G5	36	geneontology_Biological_Process	0.0629371	Up
GO:0002708	positive regulation of lymphocyte mediated immunity	24/572	106/18866	8.63e-15	2.5e-13	1.82e-13	VAV1, SASH3, IL18, HLA-E, BTK, IL12RB1, NLRP3, SLAMF6, FCER1G, SH2D1A, PTPRC, NCR3, HLA-B, XCL1, TBX21, CRTAM, C3, CD28, CD40, FOXP3, HLA-F, IL6, CD1C, LAG3	24	geneontology_Biological_Process	0.041958	Up
GO:0046640	regulation of alpha-beta T cell proliferation	15/572	33/18866	8.79e-15	2.53e-13	1.84e-13	IL18, RASAL3, HLA-E, LGALS9, SYK, CD3E, PTPRC, ZAP70, VSIR, EBI3, XCL1, CCR2, CD28, IRF1, CD55	15	geneontology_Biological_Process	0.0262238	Up
GO:0042100	B cell proliferation	23/572	97/18866	1.08e-14	3.07e-13	2.23e-13	SASH3, BTK, INPP5D, TNFSF13B, CD180, TYROBP, CD300A, PTPRC, CARD11, CD74, IKZF3, CD38, NCKAP1L, LYN, FCGR2B, CD40, MNDA, MZB1, CTLA4, IL7R, CD79A, TLR4, CD70	23	geneontology_Biological_Process	0.0402098	Up
GO:0030888	regulation of B cell proliferation	19/572	62/18866	1.35e-14	3.82e-13	2.77e-13	SASH3, BTK, INPP5D, TNFSF13B, TYROBP, CD300A, PTPRC, CARD11, CD74, IKZF3, CD38, NCKAP1L, LYN, FCGR2B, CD40, MNDA, MZB1, CTLA4, TLR4	19	geneontology_Biological_Process	0.0332168	Up
GO:0043300	regulation of leukocyte degranulation	17/572	47/18866	1.44e-14	4.06e-13	2.95e-13	VAMP8, PTAFR, LGALS9, ITGB2, SYK, ITGAM, CD300A, FCER1G, FGR, CD84, RAC2, CCR2, LYN, FCGR2B, STXBP2, HLA-F, HMOX1	17	geneontology_Biological_Process	0.0297203	Up
GO:0050920	regulation of chemotaxis	34/572	229/18866	1.63e-14	4.55e-13	3.3e-13	GPSM3, LGALS9, AIF1, CSF1R, IL16, CCL4, C3AR1, CSF1, RAC2, CD74, CCL5, CCR1, NCKAP1L, CCL3, XCL2, XCL1, CCR2, SLAMF8, LYN, CCR7, LGMN, CXCL10, CMKLR1, CXCL13, CCL2, CCL19, C5AR1, IL6, CXCL12, CCL26, TREM2, SERPINE1, VEGFD, CXCL14	34	geneontology_Biological_Process	0.0594406	Up
GO:0032680	regulation of tumor necrosis factor production	24/572	110/18866	2.1e-14	5.82e-13	4.22e-13	PTPN6, SASH3, PTAFR, HLA-E, CD33, LGALS9, CYBA, CARD9, CD2, CD14, HAVCR2, FCER1G, PTPRC, SLAMF1, VSIR, CLEC4A, TLR2, CCL3, PYCARD, FOXP3, TLR4, CCL19, TREM2, ACP5	24	geneontology_Biological_Process	0.041958	Up
GO:0050864	regulation of B cell activation	31/572	195/18866	3.57e-14	9.85e-13	7.15e-13	PTPN6, SASH3, BTK, INPP5D, SYK, TNFSF13B, TYROBP, SAMSN1, CD300A, NFAM1, TBC1D10C, PTPRC, CARD11, CD74, IKZF3, CD38, CD27, NCKAP1L, TBX21, SLAMF8, LYN, CD28, FCGR2B, CD40, MNDA, FOXP3, MZB1, CTLA4, TLR4, IGLL5, IL6	31	geneontology_Biological_Process	0.0541958	Up
GO:0002718	regulation of cytokine production involved in immune response	21/572	83/18866	3.87e-14	1.06e-12	7.69e-13	SASH3, IL18, HLA-E, BTK, LILRB1, SCIMP, NLRP3, TNFRSF1B, FCER1G, CD96, CD74, XCL1, TBX21, CCR2, FOXP3, JAK3, HLA-F, TLR4, BST2, IL6, HMOX1	21	geneontology_Biological_Process	0.0367133	Up
GO:1903555	regulation of tumor necrosis factor superfamily cytokine production	24/572	113/18866	3.97e-14	1.08e-12	7.83e-13	PTPN6, SASH3, PTAFR, HLA-E, CD33, LGALS9, CYBA, CARD9, CD2, CD14, HAVCR2, FCER1G, PTPRC, SLAMF1, VSIR, CLEC4A, TLR2, CCL3, PYCARD, FOXP3, TLR4, CCL19, TREM2, ACP5	24	geneontology_Biological_Process	0.041958	Up
GO:0070371	ERK1 and ERK2 cascade	40/572	325/18866	4.79e-14	1.29e-12	9.38e-13	PTPN6, LGALS9, CD4, SCIMP, SYK, CSF1R, HAVCR2, CCL4, TBC1D10C, PTPRC, SLAMF1, CD74, CCL5, CCR1, HLA-DRB1, CCL3, CCL8, XCL2, PYCARD, XCL1, LYN, CCL23, CCR7, P2RY6, CCL3L1, CCL13, MARCO, CCL2, PLA2G2A, TLR4, CCL19, CCL17, C5AR1, RAMP3, ICAM1, APOE, CCL18, CCL26, PLA2G5, TREM2	40	geneontology_Biological_Process	0.0699301	Up
GO:0002367	cytokine production involved in immune response	23/572	104/18866	5.39e-14	1.45e-12	1.05e-12	SASH3, IL18, HLA-E, BTK, LILRB1, SCIMP, NLRP3, TNFRSF1B, FCER1G, CD96, CD74, TLR2, XCL1, TBX21, CCR2, FOXP3, JAK3, HLA-F, TLR4, BST2, IL6, HMOX1, CD55	23	geneontology_Biological_Process	0.0402098	Up
GO:0002577	regulation of antigen processing and presentation	12/572	20/18866	5.44e-14	1.45e-12	1.05e-12	WAS, LILRB2, CD74, PYCARD, CCR7, FCGR2B, HLA-DOA, CD68, CCL19, HLA-DOB, FGL2, TREM2	12	geneontology_Biological_Process	0.020979	Up
GO:0072503	cellular divalent inorganic cation homeostasis	50/572	492/18866	6.48e-14	1.71e-12	1.24e-12	PTPN6, CORO1A, CYBA, CD4, TRPM2, GNA15, S1PR4, GPR65, LCK, CD52, CXCR3, CCRL2, C3AR1, PTPRC, P2RY8, CCR5, CCL5, CD38, CCR1, CXCR6, FASLG, FPR1, CCL3, CCL8, XCL1, CCR2, LYN, CCL23, CCR7, FPR3, S100A9, P2RY6, P2RY10, CXCL9, CD40, CXCL10, CXCL11, CMKLR1, CCL13, CXCL13, CCL19, S100A8, C5AR1, RAMP3, APOE, CD55, MT1F, CXCL12, APLNR, MT2A	50	geneontology_Biological_Process	0.0874126	Up
GO:0002824	positive regulation of adaptive immune response based on somatic recombination of immune receptors built from immunoglobulin superfamily domains	23/572	105/18866	6.71e-14	1.76e-12	1.28e-12	SASH3, IL18, HLA-E, BTK, IL12RB1, CD4, TNFSF13B, NLRP3, FCER1G, PTPRC, HLA-B, XCL1, TBX21, CCR2, C3, CD28, CD40, FOXP3, HLA-F, CCL19, ANXA1, IL6, CD1C	23	geneontology_Biological_Process	0.0402098	Up
GO:0045089	positive regulation of innate immune response	32/572	213/18866	6.99e-14	1.82e-12	1.32e-12	VAV1, HLA-E, HCK, PSMB10, SYK, CARD9, TLR8, SLAMF6, HAVCR2, FCER1G, SH2D1A, ICAM3, CLEC4A, CARD11, NCR3, PYHIN1, CCL5, CLEC10A, PYCARD, LYN, CRTAM, GBP5, CD209, FCN1, MNDA, CLEC4E, HLA-F, PSMB9, TLR4, AIM2, LAG3, PLA2G5	32	geneontology_Biological_Process	0.0559441	Up
GO:0032640	tumor necrosis factor production	24/572	116/18866	7.36e-14	1.91e-12	1.38e-12	PTPN6, SASH3, PTAFR, HLA-E, CD33, LGALS9, CYBA, CARD9, CD2, CD14, HAVCR2, FCER1G, PTPRC, SLAMF1, VSIR, CLEC4A, TLR2, CCL3, PYCARD, FOXP3, TLR4, CCL19, TREM2, ACP5	24	geneontology_Biological_Process	0.041958	Up
GO:0097028	dendritic cell differentiation	16/572	44/18866	7.87e-14	2.03e-12	1.47e-12	BATF, LILRB1, LGALS9, SPI1, TRPM2, LILRB2, HLA-B, LYN, CCR7, FCGR2B, BATF2, UBD, CCL19, TMEM176B, TMEM176A, TREM2	16	geneontology_Biological_Process	0.027972	Up
GO:0046632	alpha-beta T cell differentiation	23/572	106/18866	8.33e-14	2.13e-12	1.55e-12	SASH3, IL18, BATF, IL12RB1, LGALS9, SYK, NLRP3, SLAMF6, CD86, TNFSF8, ZAP70, SPN, NCKAP1L, TBX21, ZNF683, FOXP3, EOMES, JAK3, PLA2G2D, IRF1, CCL19, ANXA1, IL6	23	geneontology_Biological_Process	0.0402098	Up
GO:0050766	positive regulation of phagocytosis	19/572	68/18866	8.9e-14	2.26e-12	1.64e-12	CYBA, IL2RG, DOCK2, FCER1G, PTPRC, SIRPG, CLEC7A, NCKAP1L, PYCARD, IL2RB, CD300LF, C3, FCGR2B, C2, IL15RA, CCL2, PTX3, PLA2G5, TREM2	19	geneontology_Biological_Process	0.0332168	Up
GO:0032733	positive regulation of interleukin-10 production	15/572	38/18866	1.14e-13	2.88e-12	2.09e-12	SASH3, LGALS9, SYK, FCER1G, TIGIT, CLEC7A, TLR2, PYCARD, XCL1, CD28, LILRA5, TLR4, IL6, IL20RB, TREM2	15	geneontology_Biological_Process	0.0262238	Up
GO:0071706	tumor necrosis factor superfamily cytokine production	24/572	119/18866	1.34e-13	3.36e-12	2.44e-12	PTPN6, SASH3, PTAFR, HLA-E, CD33, LGALS9, CYBA, CARD9, CD2, CD14, HAVCR2, FCER1G, PTPRC, SLAMF1, VSIR, CLEC4A, TLR2, CCL3, PYCARD, FOXP3, TLR4, CCL19, TREM2, ACP5	24	geneontology_Biological_Process	0.041958	Up
GO:0031343	positive regulation of cell killing	18/572	61/18866	1.41e-13	3.49e-12	2.53e-12	VAV1, HLA-E, IL12RB1, SYK, ITGAM, TYROBP, SLAMF6, SH2D1A, PTPRC, PRF1, CLEC7A, NCR3, HLA-B, XCL1, CRTAM, HLA-F, CD1C, LAG3	18	geneontology_Biological_Process	0.0314685	Up
GO:0045576	mast cell activation	18/572	61/18866	1.41e-13	3.49e-12	2.53e-12	VAMP8, LCP2, BTK, LGALS9, SYK, LAT2, CD300A, FCER1G, FGR, RHOH, CD84, RAC2, MILR1, LYN, CD300LF, PIK3CD, STXBP2, HMOX1	18	geneontology_Biological_Process	0.0314685	Up
GO:0007204	positive regulation of cytosolic calcium ion concentration	39/572	322/18866	1.69e-13	4.16e-12	3.02e-12	PTPN6, CORO1A, CYBA, CD4, TRPM2, GNA15, S1PR4, GPR65, LCK, CD52, CXCR3, CCRL2, C3AR1, PTPRC, P2RY8, CCR5, CD38, CCR1, CXCR6, FASLG, FPR1, CCL3, XCL1, CCR2, LYN, CCR7, FPR3, P2RY6, P2RY10, CXCL9, CXCL10, CXCL11, CMKLR1, CXCL13, CCL19, C5AR1, RAMP3, CD55, APLNR	39	geneontology_Biological_Process	0.0681818	Up
GO:0002700	regulation of production of molecular mediator of immune response	26/572	144/18866	1.99e-13	4.87e-12	3.53e-12	SASH3, IL18, HLA-E, BTK, LILRB1, SCIMP, NLRP3, TNFRSF1B, FCER1G, CD96, PTPRC, CD74, XCL1, TBX21, CCR2, CD28, FCGR2B, CD40, FOXP3, MZB1, JAK3, HLA-F, TLR4, BST2, IL6, HMOX1	26	geneontology_Biological_Process	0.0454545	Up
GO:0032623	interleukin-2 production	17/572	54/18866	2.04e-13	4.95e-12	3.59e-12	SASH3, CD4, CD247, CD86, HAVCR2, FCER1G, PTPRC, CLEC7A, CARD11, VSIG4, XCL1, TBX21, CCR2, CD28, FOXP3, ANXA1, IL20RB	17	geneontology_Biological_Process	0.0297203	Up
GO:0032635	interleukin-6 production	28/572	170/18866	2.54e-13	6.15e-12	4.46e-12	PTPN6, IL18, LGALS9, CYBA, AIF1, SCIMP, SYK, CARD9, TLR8, LILRB2, TYROBP, HAVCR2, IL16, FCER1G, CD200R1, SLAMF1, CLEC7A, CD74, TLR2, NCKAP1L, TLR7, PYCARD, HLA-B, FOXP3, LILRA5, TLR4, IL6, TREM2	28	geneontology_Biological_Process	0.048951	Up
GO:0001818	negative regulation of cytokine production	41/572	360/18866	3.15e-13	7.56e-12	5.49e-12	PTPN6, BTK, CD33, LILRB1, LGALS9, TLR8, TYROBP, NLRP3, HAVCR2, CD96, PTPRC, TIGIT, CD84, CD200R1, SLAMF1, VSIR, CLEC4A, VSIG4, HLA-DRB1, SRGN, NCKAP1L, PYCARD, XCL1, TBX21, CCR7, FCGR2B, FOXP3, JAK3, CMKLR1, HLA-F, LILRA5, TLR4, IDO1, BST2, ANXA1, HMOX1, PDCD1LG2, LRRC32, IL20RB, TREM2, ACP5	41	geneontology_Biological_Process	0.0716783	Up
GO:0032675	regulation of interleukin-6 production	27/572	159/18866	3.19e-13	7.63e-12	5.54e-12	PTPN6, LGALS9, CYBA, AIF1, SCIMP, SYK, CARD9, TLR8, LILRB2, TYROBP, HAVCR2, IL16, FCER1G, CD200R1, SLAMF1, CLEC7A, CD74, TLR2, NCKAP1L, TLR7, PYCARD, HLA-B, FOXP3, LILRA5, TLR4, IL6, TREM2	27	geneontology_Biological_Process	0.0472028	Up
GO:2000401	regulation of lymphocyte migration	18/572	64/18866	3.55e-13	8.42e-12	6.11e-12	RIPK3, AIF1, CCL4, DOCK8, CD200R1, CCL5, SPN, CCL3, XCL2, PYCARD, XCL1, CCR2, CXCL10, CXCL13, CCL2, CXCL12, ECM1, CXCL14	18	geneontology_Biological_Process	0.0314685	Up
GO:0031295	T cell costimulation	17/572	56/18866	4e-13	9.43e-12	6.85e-12	PTPN6, VAV1, LCK, TNFSF13B, CD86, CD3E, CARD11, CD5, ICOS, LYN, CCR7, CD28, PDCD1, MAP3K8, CTLA4, CCL19, PDCD1LG2	17	geneontology_Biological_Process	0.0297203	Up
GO:0002495	antigen processing and presentation of peptide antigen via MHC class II	22/572	103/18866	4.09e-13	9.58e-12	6.96e-12	CTSS, HLA-DMB, HLA-DMA, MARCHF1, FCER1G, CD74, HLA-DPB1, HLA-DRB1, HLA-DRA, PYCARD, HLA-DPA1, LGMN, FCGR2B, HLA-DOA, HLA-DQA1, HLA-DRB5, HLA-DQB1, HLA-DQB2, HLA-DOB, HLA-DQA2, LAG3, TREM2	22	geneontology_Biological_Process	0.0384615	Up
GO:0007162	negative regulation of cell adhesion	37/572	301/18866	4.56e-13	1.06e-11	7.7e-12	PTPN6, TNFAIP8L2, LILRB1, LGALS9, LILRB2, CD86, HAVCR2, CD300A, PTPRC, TIGIT, VSIR, CD74, IL2RA, VSIG4, HLA-DRB1, SPN, XCL1, TBX21, CRTAM, FCGR2B, FOXP3, CTLA4, JAK3, PLA2G2D, IRF1, ADAMDEC1, ACVRL1, IDO1, CLEC4G, ANXA1, PDCD1LG2, FGL2, LRRC32, CXCL12, LAG3, IL20RB, SERPINE1	37	geneontology_Biological_Process	0.0646853	Up
GO:0042742	defense response to bacterium	40/572	348/18866	4.58e-13	1.06e-11	7.7e-12	HLA-E, IRF8, CYBA, CD4, MPEG1, SYK, CARD9, NLRP3, STAB1, TNFSF8, HAVCR2, RNASE6, FCER1G, FGR, TLR2, CFP, SPN, PYCARD, SLAMF8, S100A9, JCHAIN, LYZ, CLEC4E, CXCL13, GNLY, GBP4, PLA2G2A, TLR4, IGLL5, S100A8, C5AR1, IL6, ADAMTS5, TREM2, CTSG, SLPI, ACP5, SERPINE1, PI3, DEFB1	40	geneontology_Biological_Process	0.0699301	Up
GO:0002504	antigen processing and presentation of peptide or polysaccharide antigen via MHC class II	22/572	104/18866	5.04e-13	1.16e-11	8.43e-12	CTSS, HLA-DMB, HLA-DMA, MARCHF1, FCER1G, CD74, HLA-DPB1, HLA-DRB1, HLA-DRA, PYCARD, HLA-DPA1, LGMN, FCGR2B, HLA-DOA, HLA-DQA1, HLA-DRB5, HLA-DQB1, HLA-DQB2, HLA-DOB, HLA-DQA2, LAG3, TREM2	22	geneontology_Biological_Process	0.0384615	Up
GO:0055074	calcium ion homeostasis	47/572	468/18866	5.86e-13	1.34e-11	9.74e-12	PTPN6, CORO1A, CYBA, CD4, TRPM2, GNA15, S1PR4, GPR65, LCK, CD52, CXCR3, CCRL2, C3AR1, PTPRC, P2RY8, CCR5, CCL5, CD38, CCR1, CXCR6, FASLG, FPR1, CCL3, CCL8, XCL1, CCR2, LYN, CCL23, CCR7, FPR3, P2RY6, P2RY10, CXCL9, CD40, CXCL10, CXCL11, CMKLR1, CCL13, CXCL13, FAM20A, CCL19, C5AR1, RAMP3, APOE, CD55, CXCL12, APLNR	47	geneontology_Biological_Process	0.0821678	Up
GO:0019724	B cell mediated immunity	32/572	230/18866	6.1e-13	1.39e-11	1.01e-11	PTPN6, HLA-E, BATF, BTK, INPP5D, TLR8, C1QA, C1QC, SLA2, FCER1G, C1QB, PTPRC, CD74, CD27, HLA-DRB1, XCL1, TBX21, CR1, C3, SERPING1, CD28, FCGR2B, CD40, FOXP3, C2, HLA-DQB1, C1S, C1R, IGLL5, CD55, FGL2, CD70	32	geneontology_Biological_Process	0.0559441	Up
GO:0032735	positive regulation of interleukin-12 production	14/572	35/18866	6.12e-13	1.39e-11	1.01e-11	IRF8, LGALS9, SCIMP, LTB, SYK, IL16, CLEC7A, TLR2, IRF5, CCR7, CD40, TLR4, CCL19, IDO1	14	geneontology_Biological_Process	0.0244755	Up
GO:0002228	natural killer cell mediated immunity	18/572	66/18866	6.37e-13	1.43e-11	1.04e-11	PTPN6, VAV1, IL18, HLA-E, CORO1A, LILRB1, LGALS9, SLAMF6, HAVCR2, SH2D1A, CD96, NCR3, SLAMF7, HLA-B, CRTAM, GZMB, HLA-F, LAG3	18	geneontology_Biological_Process	0.0314685	Up
GO:0031294	lymphocyte costimulation	17/572	58/18866	7.62e-13	1.71e-11	1.24e-11	PTPN6, VAV1, LCK, TNFSF13B, CD86, CD3E, CARD11, CD5, ICOS, LYN, CCR7, CD28, PDCD1, MAP3K8, CTLA4, CCL19, PDCD1LG2	17	geneontology_Biological_Process	0.0297203	Up
GO:0006874	cellular calcium ion homeostasis	46/572	456/18866	8.92e-13	1.98e-11	1.44e-11	PTPN6, CORO1A, CYBA, CD4, TRPM2, GNA15, S1PR4, GPR65, LCK, CD52, CXCR3, CCRL2, C3AR1, PTPRC, P2RY8, CCR5, CCL5, CD38, CCR1, CXCR6, FASLG, FPR1, CCL3, CCL8, XCL1, CCR2, LYN, CCL23, CCR7, FPR3, P2RY6, P2RY10, CXCL9, CD40, CXCL10, CXCL11, CMKLR1, CCL13, CXCL13, CCL19, C5AR1, RAMP3, APOE, CD55, CXCL12, APLNR	46	geneontology_Biological_Process	0.0804196	Up
GO:0043368	positive T cell selection	14/572	36/18866	9.74e-13	2.15e-11	1.56e-11	BATF, IL12RB1, DOCK2, CD3D, SLAMF6, CD3E, PTPRC, CD3G, ZAP70, CD74, SPN, TBX21, FOXP3, IL6	14	geneontology_Biological_Process	0.0244755	Up
GO:0032753	positive regulation of interleukin-4 production	12/572	24/18866	1.04e-12	2.29e-11	1.66e-11	SASH3, HLA-E, LGALS9, SYK, NLRP3, CD86, HAVCR2, CD3E, FCER1G, CD28, FOXP3, IL20RB	12	geneontology_Biological_Process	0.020979	Up
GO:0150076	neuroinflammatory response	19/572	77/18866	1.05e-12	2.29e-11	1.66e-11	IL18, ITGB2, AIF1, TLR8, ITGAM, TYROBP, C1QA, TNFRSF1B, PTPRC, CTSC, CD200R1, TLR2, CST7, CCL3, TLR7, C5AR1, IL6, TREM2, MMP9	19	geneontology_Biological_Process	0.0332168	Up
GO:0032732	positive regulation of interleukin-1 production	17/572	60/18866	1.41e-12	3.07e-11	2.23e-11	LGALS9, TLR8, TYROBP, NLRP3, HAVCR2, IL16, CASP1, CLEC7A, PYHIN1, CCL3, PYCARD, MNDA, LILRA5, TLR4, CCL19, IL6, AIM2	17	geneontology_Biological_Process	0.0297203	Up
GO:0032612	interleukin-1 production	23/572	121/18866	1.61e-12	3.48e-11	2.53e-11	CD33, LGALS9, TLR8, TYROBP, NLRP3, HAVCR2, IL16, CASP1, CLEC7A, PYHIN1, CCL3, PYCARD, CCR7, GBP5, MNDA, LILRA5, TLR4, CCL19, ANXA1, IL6, AIM2, TREM2, ACP5	23	geneontology_Biological_Process	0.0402098	Up
GO:0002573	myeloid leukocyte differentiation	30/572	210/18866	1.63e-12	3.51e-11	2.54e-11	BATF, LILRB4, INPP5D, LILRB1, CD4, SPI1, HCLS1, EVI2B, CSF1R, TYROBP, C1QC, LILRB3, FCER1G, CSF1, CD74, TLR2, CCR1, NRROS, HLA-DRB1, CCL3, LYN, CCR7, PIK3CD, BATF2, UBD, TLR4, CCL19, OSCAR, TREM2, MMP9	30	geneontology_Biological_Process	0.0524476	Up
GO:0042267	natural killer cell mediated cytotoxicity	17/572	61/18866	1.9e-12	4.07e-11	2.96e-11	PTPN6, VAV1, IL18, HLA-E, CORO1A, LILRB1, LGALS9, SLAMF6, HAVCR2, SH2D1A, NCR3, SLAMF7, HLA-B, CRTAM, GZMB, HLA-F, LAG3	17	geneontology_Biological_Process	0.0297203	Up
GO:0032652	regulation of interleukin-1 production	22/572	111/18866	2.04e-12	4.34e-11	3.15e-11	CD33, LGALS9, TLR8, TYROBP, NLRP3, HAVCR2, IL16, CASP1, CLEC7A, PYHIN1, CCL3, PYCARD, CCR7, MNDA, LILRA5, TLR4, CCL19, ANXA1, IL6, AIM2, TREM2, ACP5	22	geneontology_Biological_Process	0.0384615	Up
GO:2000403	positive regulation of lymphocyte migration	14/572	38/18866	2.35e-12	4.96e-11	3.6e-11	AIF1, CCL4, DOCK8, CCL5, SPN, CCL3, XCL2, PYCARD, XCL1, CCR2, CXCL10, CXCL13, CXCL12, CXCL14	14	geneontology_Biological_Process	0.0244755	Up
GO:0042116	macrophage activation	21/572	101/18866	2.44e-12	5.14e-11	3.73e-11	ITGB2, AIF1, SYK, TLR8, ITGAM, TYROBP, C1QA, HAVCR2, PTPRC, CTSC, CD74, TLR2, VSIG4, CST7, CCL3, TLR7, FCGR2B, TLR4, C5AR1, IL6, TREM2	21	geneontology_Biological_Process	0.0367133	Up
GO:0002292	T cell differentiation involved in immune response	18/572	71/18866	2.51e-12	5.26e-11	3.82e-11	IL18, BATF, IL12RB1, LGALS9, NLRP3, SLAMF6, CD86, FCER1G, SPN, TBX21, FOXP3, CLEC4E, EOMES, JAK3, CCL19, ANXA1, IL6, FGL2	18	geneontology_Biological_Process	0.0314685	Up
GO:0034612	response to tumor necrosis factor	37/572	320/18866	2.96e-12	6.16e-11	4.47e-11	CYBA, PSMB10, LTB, SYK, TNFSF13B, CD14, TNFSF8, TNFRSF1B, CCL4, CASP4, CASP1, CCL5, CD27, CCL3, CCL8, XCL2, PYCARD, XCL1, CCL23, CXCL16, CCL3L1, CD40, CCL13, TNFRSF18, UBD, GGT5, CCL2, PSMB9, CCL19, CCL17, ICAM1, AIM2, CCL18, CCL26, TNFSF9, CD70, FABP4	37	geneontology_Biological_Process	0.0646853	Up
GO:0032673	regulation of interleukin-4 production	13/572	32/18866	3.27e-12	6.78e-11	4.92e-11	SASH3, HLA-E, LGALS9, SYK, NLRP3, CD86, HAVCR2, CD3E, FCER1G, HLA-DRB1, CD28, FOXP3, IL20RB	13	geneontology_Biological_Process	0.0227273	Up
GO:0002440	production of molecular mediator of immune response	36/572	306/18866	3.52e-12	7.24e-11	5.25e-11	SASH3, IL18, HLA-E, BATF, BTK, LILRB1, SCIMP, TNFSF13B, NLRP3, CD86, TNFRSF1B, FCER1G, CD96, PTPRC, CARD11, CD74, TLR2, HLA-DRB1, XCL1, TBX21, CCR2, CD28, FCGR2B, CD40, FOXP3, MZB1, JAK3, HLA-DQB1, HLA-F, IL7R, TLR4, BST2, IL6, HMOX1, CD55, FGL2	36	geneontology_Biological_Process	0.0629371	Up
GO:0002507	tolerance induction	12/572	26/18866	3.53e-12	7.24e-11	5.25e-11	HLA-E, LGALS9, LILRB2, HAVCR2, CD3E, IL2RA, ICOS, HLA-B, LYN, PDCD1, FOXP3, IDO1	12	geneontology_Biological_Process	0.020979	Up
GO:0043303	mast cell degranulation	15/572	47/18866	4.3e-12	8.78e-11	6.37e-11	VAMP8, BTK, LGALS9, SYK, LAT2, CD300A, FCER1G, FGR, CD84, RAC2, MILR1, LYN, PIK3CD, STXBP2, HMOX1	15	geneontology_Biological_Process	0.0262238	Up
GO:0051480	regulation of cytosolic calcium ion concentration	39/572	357/18866	4.49e-12	9.11e-11	6.61e-11	PTPN6, CORO1A, CYBA, CD4, TRPM2, GNA15, S1PR4, GPR65, LCK, CD52, CXCR3, CCRL2, C3AR1, PTPRC, P2RY8, CCR5, CD38, CCR1, CXCR6, FASLG, FPR1, CCL3, XCL1, CCR2, LYN, CCR7, FPR3, P2RY6, P2RY10, CXCL9, CXCL10, CXCL11, CMKLR1, CXCL13, CCL19, C5AR1, RAMP3, CD55, APLNR	39	geneontology_Biological_Process	0.0681818	Up
GO:0002279	mast cell activation involved in immune response	15/572	48/18866	6.09e-12	1.22e-10	8.87e-11	VAMP8, BTK, LGALS9, SYK, LAT2, CD300A, FCER1G, FGR, CD84, RAC2, MILR1, LYN, PIK3CD, STXBP2, HMOX1	15	geneontology_Biological_Process	0.0262238	Up
GO:0002820	negative regulation of adaptive immune response	15/572	48/18866	6.09e-12	1.22e-10	8.87e-11	PTPN6, LILRB1, SAMSN1, HAVCR2, PTPRC, XCL1, TBX21, CR1, FCGR2B, FOXP3, JAK3, HLA-F, IL7R, CLEC4G, IL20RB	15	geneontology_Biological_Process	0.0262238	Up
GO:0002448	mast cell mediated immunity	15/572	49/18866	8.53e-12	1.69e-10	1.22e-10	VAMP8, BTK, LGALS9, SYK, LAT2, CD300A, FCER1G, FGR, CD84, RAC2, MILR1, LYN, PIK3CD, STXBP2, HMOX1	15	geneontology_Biological_Process	0.0262238	Up
GO:0032663	regulation of interleukin-2 production	15/572	49/18866	8.53e-12	1.69e-10	1.22e-10	SASH3, CD4, CD86, HAVCR2, PTPRC, CLEC7A, CARD11, VSIG4, XCL1, TBX21, CCR2, CD28, FOXP3, ANXA1, IL20RB	15	geneontology_Biological_Process	0.0262238	Up
GO:2000107	negative regulation of leukocyte apoptotic process	15/572	49/18866	8.53e-12	1.69e-10	1.22e-10	LILRB1, HCLS1, FCER1G, DOCK8, CCR5, CD74, CCL5, HSH2D, CD27, CCR7, JAK3, IL7R, CCL19, IDO1, CXCL12	15	geneontology_Biological_Process	0.0262238	Up
GO:0009615	response to virus	38/572	349/18866	9.41e-12	1.85e-10	1.34e-10	RIPK3, IL12RB1, LILRB1, LGALS9, CARD9, TLR8, UNC93B1, NLRP3, RNASE6, FGR, CCL4, PTPRC, PRF1, CCL5, APOBEC3H, IL2RA, IRF5, CCL8, TLR7, PYCARD, XCL1, TBX21, CXCL9, CD40, FOXP3, CXCL10, IRF1, RNASE2, IFI27, CCL19, IFITM1, OAS1, BST2, IL6, AIM2, FGL2, CXCL12, OASL	38	geneontology_Biological_Process	0.0664336	Up
GO:0035710	CD4-positive, alpha-beta T cell activation	20/572	97/18866	9.6e-12	1.88e-10	1.36e-10	SASH3, IL18, BATF, IL12RB1, LGALS9, NLRP3, SLAMF6, CD86, VSIR, SPN, NCKAP1L, XCL1, TBX21, FOXP3, JAK3, PLA2G2D, CCL19, ANXA1, IL6, CD55	20	geneontology_Biological_Process	0.034965	Up
GO:0010818	T cell chemotaxis	12/572	28/18866	1.05e-11	2.05e-10	1.49e-10	CXCR3, CCL5, CCL3, XCL2, XCL1, CCR2, CXCL16, PIK3CD, CXCL10, CXCL11, CXCL13, CCL26	12	geneontology_Biological_Process	0.020979	Up
GO:0001774	microglial cell activation	15/572	50/18866	1.18e-11	2.29e-10	1.66e-10	ITGB2, AIF1, TLR8, ITGAM, TYROBP, C1QA, PTPRC, CTSC, TLR2, CST7, CCL3, TLR7, C5AR1, IL6, TREM2	15	geneontology_Biological_Process	0.0262238	Up
GO:0002269	leukocyte activation involved in inflammatory response	15/572	50/18866	1.18e-11	2.29e-10	1.66e-10	ITGB2, AIF1, TLR8, ITGAM, TYROBP, C1QA, PTPRC, CTSC, TLR2, CST7, CCL3, TLR7, C5AR1, IL6, TREM2	15	geneontology_Biological_Process	0.0262238	Up
GO:0016064	immunoglobulin mediated immune response	30/572	227/18866	1.23e-11	2.37e-10	1.72e-10	PTPN6, HLA-E, BATF, BTK, INPP5D, TLR8, C1QA, C1QC, FCER1G, C1QB, PTPRC, CD74, CD27, HLA-DRB1, XCL1, TBX21, CR1, C3, SERPING1, CD28, FCGR2B, CD40, FOXP3, C2, HLA-DQB1, C1S, C1R, IGLL5, CD55, FGL2	30	geneontology_Biological_Process	0.0524476	Up
GO:0032633	interleukin-4 production	13/572	35/18866	1.28e-11	2.43e-10	1.77e-10	SASH3, HLA-E, LGALS9, SYK, NLRP3, CD86, HAVCR2, CD3E, FCER1G, HLA-DRB1, CD28, FOXP3, IL20RB	13	geneontology_Biological_Process	0.0227273	Up
GO:0045066	regulatory T cell differentiation	13/572	35/18866	1.28e-11	2.43e-10	1.77e-10	LILRB4, LGALS9, LILRB2, VSIR, IL2RA, CR1, CD28, FOXP3, CTLA4, TNFRSF18, PLA2G2D, IRF1, LAG3	13	geneontology_Biological_Process	0.0227273	Up
GO:0032755	positive regulation of interleukin-6 production	19/572	88/18866	1.35e-11	2.54e-10	1.85e-10	LGALS9, CYBA, AIF1, SCIMP, SYK, CARD9, TLR8, LILRB2, TYROBP, IL16, FCER1G, CLEC7A, CD74, TLR2, TLR7, PYCARD, LILRA5, TLR4, IL6	19	geneontology_Biological_Process	0.0332168	Up
GO:0071675	regulation of mononuclear cell migration	15/572	51/18866	1.63e-11	3.07e-10	2.23e-10	AIF1, CSF1R, C3AR1, CSF1, CCL5, CCR1, CCR2, SLAMF8, LYN, LGMN, CXCL10, CMKLR1, C5AR1, CXCL12, SERPINE1	15	geneontology_Biological_Process	0.0262238	Up
GO:0002823	negative regulation of adaptive immune response based on somatic recombination of immune receptors built from immunoglobulin superfamily domains	14/572	43/18866	1.65e-11	3.1e-10	2.25e-10	PTPN6, LILRB1, HAVCR2, PTPRC, XCL1, TBX21, CR1, FCGR2B, FOXP3, JAK3, HLA-F, IL7R, CLEC4G, IL20RB	14	geneontology_Biological_Process	0.0244755	Up
GO:0001912	positive regulation of leukocyte mediated cytotoxicity	15/572	52/18866	2.23e-11	4.16e-10	3.02e-10	VAV1, HLA-E, IL12RB1, ITGAM, TYROBP, SLAMF6, SH2D1A, PTPRC, NCR3, HLA-B, XCL1, CRTAM, HLA-F, CD1C, LAG3	15	geneontology_Biological_Process	0.0262238	Up
GO:0001913	T cell mediated cytotoxicity	14/572	44/18866	2.36e-11	4.35e-10	3.16e-10	RIPK3, HLA-E, IL12RB1, LILRB1, PTPRC, PRF1, CTSC, GZMM, HLA-B, XCL1, FCGR2B, HLA-F, IL7R, CD1C	14	geneontology_Biological_Process	0.0244755	Up
GO:2000404	regulation of T cell migration	14/572	44/18866	2.36e-11	4.35e-10	3.16e-10	RIPK3, AIF1, DOCK8, CD200R1, CCL5, SPN, XCL2, PYCARD, XCL1, CCR2, CXCL10, CXCL13, CXCL12, ECM1	14	geneontology_Biological_Process	0.0244755	Up
GO:0002291	T cell activation via T cell receptor contact with antigen bound to MHC molecule on antigen presenting cell	8/572	10/18866	2.9e-11	5.34e-10	3.87e-10	LILRB1, LGALS9, HLA-DMB, ITGAL, HAVCR2, APBB1IP, ICAM1, FGL2	8	geneontology_Biological_Process	0.013986	Up
GO:0045730	respiratory burst	13/572	37/18866	2.92e-11	5.35e-10	3.88e-10	NCF1, NCF4, HCK, CYBA, CYBB, CD52, RAC2, CLEC7A, NCF2, SLAMF8, PIK3CD, JCHAIN, CD55	13	geneontology_Biological_Process	0.0227273	Up
GO:0032731	positive regulation of interleukin-1 beta production	15/572	53/18866	3.02e-11	5.51e-10	4e-10	LGALS9, TLR8, TYROBP, NLRP3, CASP1, CLEC7A, PYHIN1, CCL3, PYCARD, MNDA, LILRA5, TLR4, CCL19, IL6, AIM2	15	geneontology_Biological_Process	0.0262238	Up
GO:0006968	cellular defense response	15/572	54/18866	4.07e-11	7.38e-10	5.36e-10	NCF1, LILRB2, TYROBP, CD300C, SH2D1A, PRF1, CCR5, SPN, NCF2, CCR2, CXCL9, MNDA, LSP1, GNLY, C5AR1	15	geneontology_Biological_Process	0.0262238	Up
GO:0031348	negative regulation of defense response	32/572	269/18866	4.28e-11	7.72e-10	5.6e-10	HLA-E, TNFAIP8L2, AOAH, LILRB1, LGALS9, ALOX5, NLRP3, TNFRSF1B, HAVCR2, CD96, PTPRC, CD200R1, IL2RA, VSIG4, CST7, HLA-DRB1, PYCARD, HLA-B, SLAMF8, CR1, SERPING1, FCGR2B, SIGLEC10, FOXP3, HLA-F, METRNL, APOE, FGL2, NT5E, IL20RB, TNFAIP6, ACP5	32	geneontology_Biological_Process	0.0559441	Up
GO:0002710	negative regulation of T cell mediated immunity	10/572	19/18866	4.39e-11	7.88e-10	5.72e-10	LILRB1, PTPRC, XCL1, TBX21, FCGR2B, FOXP3, HLA-F, IL7R, CLEC4G, IL20RB	10	geneontology_Biological_Process	0.0174825	Up
GO:1902106	negative regulation of leukocyte differentiation	20/572	105/18866	4.44e-11	7.94e-10	5.76e-10	LILRB4, INPP5D, LILRB1, C1QC, LILRB3, CD74, CCL3, TBX21, LYN, FCGR2B, FOXP3, CTLA4, JAK3, IRF1, TLR4, TMEM176B, TMEM176A, ANXA1, FGL2, LAG3	20	geneontology_Biological_Process	0.034965	Up
GO:0070227	lymphocyte apoptotic process	17/572	73/18866	4.47e-11	7.96e-10	5.78e-10	RIPK3, BTK, LGALS9, GIMAP8, DOCK8, CD3G, CD74, CCL5, IL2RA, HSH2D, CD27, FASLG, LYN, PDCD1, JAK3, IL7R, IDO1	17	geneontology_Biological_Process	0.0297203	Up
GO:0032611	interleukin-1 beta production	20/572	106/18866	5.32e-11	9.43e-10	6.84e-10	CD33, LGALS9, TLR8, TYROBP, NLRP3, CASP1, CLEC7A, PYHIN1, CCL3, PYCARD, CCR7, GBP5, MNDA, LILRA5, TLR4, CCL19, IL6, AIM2, TREM2, ACP5	20	geneontology_Biological_Process	0.034965	Up
GO:0045589	regulation of regulatory T cell differentiation	12/572	32/18866	6.99e-11	1.23e-09	8.94e-10	LILRB4, LGALS9, LILRB2, VSIR, IL2RA, CR1, CD28, FOXP3, CTLA4, TNFRSF18, IRF1, LAG3	12	geneontology_Biological_Process	0.020979	Up
GO:0070228	regulation of lymphocyte apoptotic process	15/572	56/18866	7.23e-11	1.27e-09	9.22e-10	RIPK3, BTK, LGALS9, GIMAP8, DOCK8, CD3G, CD74, CCL5, HSH2D, CD27, LYN, PDCD1, JAK3, IL7R, IDO1	15	geneontology_Biological_Process	0.0262238	Up
GO:0032651	regulation of interleukin-1 beta production	19/572	97/18866	8.18e-11	1.43e-09	1.04e-09	CD33, LGALS9, TLR8, TYROBP, NLRP3, CASP1, CLEC7A, PYHIN1, CCL3, PYCARD, CCR7, MNDA, LILRA5, TLR4, CCL19, IL6, AIM2, TREM2, ACP5	19	geneontology_Biological_Process	0.0332168	Up
GO:0019886	antigen processing and presentation of exogenous peptide antigen via MHC class II	19/572	99/18866	1.19e-10	2.07e-09	1.5e-09	CTSS, HLA-DMB, HLA-DMA, FCER1G, CD74, HLA-DPB1, HLA-DRB1, HLA-DRA, HLA-DPA1, LGMN, FCGR2B, HLA-DOA, HLA-DQA1, HLA-DRB5, HLA-DQB1, HLA-DQB2, HLA-DOB, HLA-DQA2, LAG3	19	geneontology_Biological_Process	0.0332168	Up
GO:0071356	cellular response to tumor necrosis factor	33/572	297/18866	1.32e-10	2.29e-09	1.66e-09	CYBA, PSMB10, LTB, SYK, TNFSF13B, TNFSF8, TNFRSF1B, CCL4, CASP4, CASP1, CCL5, CD27, CCL3, CCL8, XCL2, PYCARD, XCL1, CCL23, CCL3L1, CD40, CCL13, TNFRSF18, CCL2, PSMB9, CCL19, CCL17, ICAM1, AIM2, CCL18, CCL26, TNFSF9, CD70, FABP4	33	geneontology_Biological_Process	0.0576923	Up
GO:0043367	CD4-positive, alpha-beta T cell differentiation	17/572	78/18866	1.38e-10	2.38e-09	1.73e-09	SASH3, IL18, BATF, IL12RB1, LGALS9, NLRP3, SLAMF6, CD86, SPN, NCKAP1L, TBX21, FOXP3, JAK3, PLA2G2D, CCL19, ANXA1, IL6	17	geneontology_Biological_Process	0.0297203	Up
GO:0032760	positive regulation of tumor necrosis factor production	14/572	50/18866	1.63e-10	2.79e-09	2.03e-09	SASH3, PTAFR, HLA-E, CYBA, CARD9, CD2, CD14, FCER1G, PTPRC, TLR2, CCL3, PYCARD, TLR4, CCL19	14	geneontology_Biological_Process	0.0244755	Up
GO:0031663	lipopolysaccharide-mediated signaling pathway	15/572	59/18866	1.63e-10	2.79e-09	2.03e-09	PTAFR, IL18, HCK, SCIMP, LY86, CD180, CD14, TLR2, CCL5, CCL3, LYN, CD6, CCL2, TLR4, CD55	15	geneontology_Biological_Process	0.0262238	Up
GO:0061900	glial cell activation	15/572	60/18866	2.12e-10	3.6e-09	2.61e-09	ITGB2, AIF1, TLR8, ITGAM, TYROBP, C1QA, PTPRC, CTSC, TLR2, CST7, CCL3, TLR7, C5AR1, IL6, TREM2	15	geneontology_Biological_Process	0.0262238	Up
GO:0043547	positive regulation of GTPase activity	39/572	406/18866	2.22e-10	3.76e-09	2.73e-09	ARHGAP30, VAV1, RASAL3, ARHGAP9, ARHGAP45, ADAP2, GPR65, DOCK2, ARHGAP4, CCL4, TBC1D10C, DOCK8, CCL5, ADAP1, NCKAP1L, CCL3, CCL8, XCL2, RGS18, XCL1, ACAP1, CCL23, CCR7, ARHGAP15, TAGAP, CCL3L1, CD40, CCL13, CXCL13, CCL2, CCL19, CCL17, CDC42EP2, ICAM1, S100A10, CCL18, RGS1, CCL26, ALDH1A1	39	geneontology_Biological_Process	0.0681818	Up
GO:0043087	regulation of GTPase activity	43/572	481/18866	2.54e-10	4.28e-09	3.11e-09	ARHGAP30, VAV1, FGD3, RASAL3, FGD2, ARHGAP9, ARHGAP45, ADAP2, GPR65, DOCK2, ARHGAP4, CCL4, TBC1D10C, DOCK8, RHOH, CCL5, ADAP1, NCKAP1L, CCL3, CCL8, XCL2, PYCARD, RGS18, XCL1, ACAP1, CCL23, CCR7, ARHGAP15, TAGAP, CCL3L1, CD40, CCL13, CXCL13, CCL2, CCL19, CCL17, CDC42EP2, ICAM1, S100A10, CCL18, RGS1, CCL26, ALDH1A1	43	geneontology_Biological_Process	0.0751748	Up
GO:0045061	thymic T cell selection	10/572	22/18866	2.83e-10	4.75e-09	3.45e-09	DOCK2, CD3D, CD3E, PTPRC, CD3G, ZAP70, CARD11, CD74, CCR7, CD28	10	geneontology_Biological_Process	0.0174825	Up
GO:1903557	positive regulation of tumor necrosis factor superfamily cytokine production	14/572	52/18866	2.9e-10	4.86e-09	3.52e-09	SASH3, PTAFR, HLA-E, CYBA, CARD9, CD2, CD14, FCER1G, PTPRC, TLR2, CCL3, PYCARD, TLR4, CCL19	14	geneontology_Biological_Process	0.0244755	Up
GO:2000516	positive regulation of CD4-positive, alpha-beta T cell activation	12/572	36/18866	3.47e-10	5.78e-09	4.19e-09	SASH3, IL18, IL12RB1, LGALS9, NLRP3, CD86, NCKAP1L, XCL1, FOXP3, CCL19, ANXA1, CD55	12	geneontology_Biological_Process	0.020979	Up
GO:0033003	regulation of mast cell activation	13/572	44/18866	3.5e-10	5.81e-09	4.22e-09	VAMP8, LGALS9, SYK, CD300A, FCER1G, FGR, CD84, RAC2, MILR1, LYN, CD300LF, STXBP2, HMOX1	13	geneontology_Biological_Process	0.0227273	Up
GO:0036336	dendritic cell migration	11/572	29/18866	3.81e-10	6.3e-09	4.57e-09	LGALS9, TRPM2, ALOX5, DOCK8, CCR5, CCL5, CCR1, CCR2, SLAMF8, CCR7, CCL19	11	geneontology_Biological_Process	0.0192308	Up
GO:0032695	negative regulation of interleukin-12 production	9/572	17/18866	3.98e-10	6.55e-09	4.75e-09	LILRB1, TLR8, TIGIT, SLAMF1, CCR7, JAK3, CMKLR1, LILRA5, ACP5	9	geneontology_Biological_Process	0.0157343	Up
GO:0002287	alpha-beta T cell activation involved in immune response	15/572	63/18866	4.47e-10	7.26e-09	5.27e-09	IL18, BATF, IL12RB1, LGALS9, NLRP3, SLAMF6, CD86, SPN, TBX21, FOXP3, EOMES, JAK3, CCL19, ANXA1, IL6	15	geneontology_Biological_Process	0.0262238	Up
GO:0002293	alpha-beta T cell differentiation involved in immune response	15/572	63/18866	4.47e-10	7.26e-09	5.27e-09	IL18, BATF, IL12RB1, LGALS9, NLRP3, SLAMF6, CD86, SPN, TBX21, FOXP3, EOMES, JAK3, CCL19, ANXA1, IL6	15	geneontology_Biological_Process	0.0262238	Up
GO:2000514	regulation of CD4-positive, alpha-beta T cell activation	15/572	63/18866	4.47e-10	7.26e-09	5.27e-09	SASH3, IL18, IL12RB1, LGALS9, NLRP3, CD86, VSIR, NCKAP1L, XCL1, TBX21, FOXP3, JAK3, CCL19, ANXA1, CD55	15	geneontology_Biological_Process	0.0262238	Up
GO:0002715	regulation of natural killer cell mediated immunity	13/572	45/18866	4.79e-10	7.75e-09	5.63e-09	VAV1, HLA-E, LILRB1, LGALS9, SLAMF6, HAVCR2, SH2D1A, CD96, NCR3, HLA-B, CRTAM, HLA-F, LAG3	13	geneontology_Biological_Process	0.0227273	Up
GO:0032757	positive regulation of interleukin-8 production	14/572	54/18866	5.03e-10	8.11e-09	5.89e-09	LGALS9, SYK, TLR8, CD2, CD14, CLEC7A, CD74, TLR2, TLR7, PYCARD, FCN1, TLR4, IL6, SERPINE1	14	geneontology_Biological_Process	0.0244755	Up
GO:0046637	regulation of alpha-beta T cell differentiation	15/572	64/18866	5.67e-10	9.1e-09	6.61e-09	SASH3, IL18, IL12RB1, LGALS9, SYK, NLRP3, CD86, ZAP70, NCKAP1L, TBX21, ZNF683, FOXP3, JAK3, CCL19, ANXA1	15	geneontology_Biological_Process	0.0262238	Up
GO:0002920	regulation of humoral immune response	21/572	134/18866	6.52e-10	1.04e-08	7.56e-09	PTPN6, C1QA, C1QC, C1QB, C3AR1, PTPRC, CFP, VSIG4, CCR7, CR1, C3, SERPING1, FCGR2B, C2, C1S, CXCL13, C1R, C5AR1, CFB, CD55, CFH	21	geneontology_Biological_Process	0.0367133	Up
GO:0002438	acute inflammatory response to antigenic stimulus	10/572	24/18866	8.12e-10	1.29e-08	9.38e-09	HLA-E, BTK, FCER1G, CD6, CCR7, C3, FCGR2B, PLA2G2D, ICAM1, IL20RB	10	geneontology_Biological_Process	0.0174825	Up
GO:0002828	regulation of type 2 immune response	11/572	31/18866	8.83e-10	1.39e-08	1.01e-08	IL18, NLRP3, CD86, CD74, XCL1, TBX21, CCR2, IDO1, ANXA1, IL6, ECM1	11	geneontology_Biological_Process	0.0192308	Up
GO:2000406	positive regulation of T cell migration	11/572	31/18866	8.83e-10	1.39e-08	1.01e-08	AIF1, DOCK8, CCL5, SPN, XCL2, PYCARD, XCL1, CCR2, CXCL10, CXCL13, CXCL12	11	geneontology_Biological_Process	0.0192308	Up
GO:0042092	type 2 immune response	12/572	39/18866	9.97e-10	1.57e-08	1.14e-08	IL18, BATF, NLRP3, CD86, CD74, XCL1, TBX21, CCR2, IDO1, ANXA1, IL6, ECM1	12	geneontology_Biological_Process	0.020979	Up
GO:0002224	toll-like receptor signaling pathway	22/572	152/18866	1.21e-09	1.9e-08	1.38e-08	BTK, CTSS, CYBA, ITGB2, SCIMP, PIK3AP1, TLR8, ITGAM, UNC93B1, CD14, HAVCR2, CD300A, TLR2, TLR7, LYN, LGMN, CD300LF, S100A9, CD40, IRF1, TLR4, S100A8	22	geneontology_Biological_Process	0.0384615	Up
GO:0030099	myeloid cell differentiation	39/572	431/18866	1.26e-09	1.96e-08	1.42e-08	PTPN6, BATF, RASGRP4, IRF8, LILRB4, CSF3R, INPP5D, LILRB1, CD4, SPI1, HCLS1, IKZF1, EVI2B, CSF1R, TYROBP, C1QC, LILRB3, FCER1G, CSF1, CD74, TLR2, CCR1, NRROS, HLA-DRB1, NCKAP1L, CCL3, LYN, CCR7, ZNF385A, PIK3CD, GPR171, JAK3, BATF2, UBD, TLR4, CCL19, OSCAR, TREM2, MMP9	39	geneontology_Biological_Process	0.0681818	Up
GO:0043304	regulation of mast cell degranulation	11/572	32/18866	1.31e-09	2.03e-08	1.47e-08	VAMP8, LGALS9, SYK, CD300A, FCER1G, FGR, CD84, RAC2, LYN, STXBP2, HMOX1	11	geneontology_Biological_Process	0.0192308	Up
GO:0050869	negative regulation of B cell activation	11/572	32/18866	1.31e-09	2.03e-08	1.47e-08	BTK, INPP5D, TYROBP, SAMSN1, CD300A, TBC1D10C, LYN, FCGR2B, MNDA, FOXP3, CTLA4	11	geneontology_Biological_Process	0.0192308	Up
GO:0070555	response to interleukin-1	26/572	211/18866	1.36e-09	2.1e-08	1.52e-08	LGALS9, CYBA, PSMB10, CCL4, CCL5, CD38, CCL3, CCL8, XCL2, PYCARD, XCL1, CCL23, CCL3L1, CD40, MAP3K8, CCL13, CCL2, PSMB9, CCL19, CCL17, ICAM1, ANXA1, IL6, CCL18, TFPI, CCL26	26	geneontology_Biological_Process	0.0454545	Up
GO:0032102	negative regulation of response to external stimulus	39/572	433/18866	1.44e-09	2.21e-08	1.6e-08	HLA-E, TNFAIP8L2, AOAH, LILRB1, LGALS9, AIF1, ALOX5, NLRP3, TNFRSF1B, HAVCR2, CD96, PTPRC, CD200R1, IL2RA, VSIG4, CST7, HLA-DRB1, PYCARD, HLA-B, SLAMF8, CR1, SERPING1, FCGR2B, SIGLEC10, FOXP3, HLA-F, CXCL13, CCL2, METRNL, PLAU, APOE, TFPI, PLAUR, FGL2, NT5E, IL20RB, TNFAIP6, ACP5, SERPINE1	39	geneontology_Biological_Process	0.0681818	Up
GO:0042590	antigen processing and presentation of exogenous peptide antigen via MHC class I	16/572	80/18866	1.85e-09	2.83e-08	2.06e-08	NCF1, VAMP8, HLA-E, NCF4, CYBA, PSMB10, CYBB, FCGR1B, FCER1G, FCGR1A, CLEC4A, NCF2, HLA-B, HLA-C, HLA-F, PSMB9	16	geneontology_Biological_Process	0.027972	Up
GO:0042269	regulation of natural killer cell mediated cytotoxicity	12/572	41/18866	1.9e-09	2.9e-08	2.1e-08	VAV1, HLA-E, LILRB1, LGALS9, SLAMF6, HAVCR2, SH2D1A, NCR3, HLA-B, CRTAM, HLA-F, LAG3	12	geneontology_Biological_Process	0.020979	Up
GO:0033006	regulation of mast cell activation involved in immune response	11/572	33/18866	1.91e-09	2.9e-08	2.1e-08	VAMP8, LGALS9, SYK, CD300A, FCER1G, FGR, CD84, RAC2, LYN, STXBP2, HMOX1	11	geneontology_Biological_Process	0.0192308	Up
GO:0090025	regulation of monocyte chemotaxis	10/572	26/18866	2.08e-09	3.15e-08	2.28e-08	AIF1, CCL5, CCR1, CCR2, SLAMF8, LYN, LGMN, CXCL10, CXCL12, SERPINE1	10	geneontology_Biological_Process	0.0174825	Up
GO:0002532	production of molecular mediator involved in inflammatory response	17/572	93/18866	2.49e-09	3.73e-08	2.71e-08	VAMP8, GPSM3, BTK, SYK, ALOX5, FCER1G, CD96, CLEC7A, PYCARD, SLAMF8, LYN, CD6, GBP5, TLR4, IDO1, IL6, SERPINE1	17	geneontology_Biological_Process	0.0297203	Up
GO:0032677	regulation of interleukin-8 production	17/572	93/18866	2.49e-09	3.73e-08	2.71e-08	CD33, LGALS9, SYK, TLR8, CD2, CD14, PTPRC, CLEC7A, CD74, TLR2, TLR7, PYCARD, FCN1, TLR4, ANXA1, IL6, SERPINE1	17	geneontology_Biological_Process	0.0297203	Up
GO:0002524	hypersensitivity	7/572	10/18866	2.52e-09	3.76e-08	2.73e-08	HLA-E, BTK, FCER1G, CCR7, C3, FCGR2B, IL20RB	7	geneontology_Biological_Process	0.0122378	Up
GO:0001911	negative regulation of leukocyte mediated cytotoxicity	9/572	20/18866	2.54e-09	3.78e-08	2.74e-08	HLA-E, LILRB1, LGALS9, HAVCR2, PTPRC, HLA-B, FCGR2B, HLA-F, IL7R	9	geneontology_Biological_Process	0.0157343	Up
GO:0002888	positive regulation of myeloid leukocyte mediated immunity	11/572	34/18866	2.75e-09	4.08e-08	2.96e-08	VAMP8, PTAFR, HLA-E, BTK, ITGB2, SYK, ITGAM, TYROBP, FCER1G, FGR, C3	11	geneontology_Biological_Process	0.0192308	Up
GO:0036037	CD8-positive, alpha-beta T cell activation	10/572	27/18866	3.22e-09	4.74e-08	3.44e-08	HLA-E, LILRB1, TNFSF8, VSIR, CLEC4A, NCKAP1L, XCL1, CRTAM, EOMES, IRF1	10	geneontology_Biological_Process	0.0174825	Up
GO:1901623	regulation of lymphocyte chemotaxis	10/572	27/18866	3.22e-09	4.74e-08	3.44e-08	CCL4, CCL5, CCL3, XCL2, XCL1, CCR2, CXCL10, CXCL13, CCL2, CXCL14	10	geneontology_Biological_Process	0.0174825	Up
GO:0052547	regulation of peptidase activity	40/572	466/18866	3.54e-09	5.19e-08	3.77e-08	LGALS9, SYK, CARD9, LCK, NLRP3, CASP1, VSIR, CLEC7A, CD27, CST7, FASLG, PYCARD, LYN, CR1, LGMN, SERPINA1, S100A9, C3, SERPING1, TNFSF10, RENBP, CSTA, RARRES1, PSMB9, CST3, S100A8, LXN, BST2, AIM2, SPOCK2, TFPI, PLAUR, PI16, PCOLCE, RCN3, SLPI, SERPINE1, PI3, ECM1, MMP9	40	geneontology_Biological_Process	0.0699301	Up
GO:0002294	CD4-positive, alpha-beta T cell differentiation involved in immune response	14/572	62/18866	3.61e-09	5.27e-08	3.83e-08	IL18, BATF, IL12RB1, LGALS9, NLRP3, SLAMF6, CD86, SPN, TBX21, FOXP3, JAK3, CCL19, ANXA1, IL6	14	geneontology_Biological_Process	0.0244755	Up
GO:0002864	regulation of acute inflammatory response to antigenic stimulus	8/572	15/18866	3.63e-09	5.28e-08	3.83e-08	HLA-E, BTK, FCER1G, CCR7, C3, FCGR2B, PLA2G2D, IL20RB	8	geneontology_Biological_Process	0.013986	Up
GO:0001914	regulation of T cell mediated cytotoxicity	11/572	35/18866	3.9e-09	5.65e-08	4.1e-08	RIPK3, HLA-E, IL12RB1, LILRB1, PTPRC, HLA-B, XCL1, FCGR2B, HLA-F, IL7R, CD1C	11	geneontology_Biological_Process	0.0192308	Up
GO:0046718	viral entry into host cell	20/572	134/18866	4e-09	5.78e-08	4.19e-08	VAMP8, SELPLG, LGALS9, CD4, SIGLEC1, CD86, CCR5, SLAMF1, CD74, HLA-DRB1, CR1, MRC1, CD209, FCN1, IFITM1, ANPEP, CLEC4G, ICAM1, CD55, PTX3	20	geneontology_Biological_Process	0.034965	Up
GO:0042088	T-helper 1 type immune response	12/572	44/18866	4.68e-09	6.74e-08	4.89e-08	IL18, IL12RB1, HAVCR2, HLA-DRB1, SPN, EBI3, XCL1, CCR2, JAK3, TLR4, CCL19, ANXA1	12	geneontology_Biological_Process	0.020979	Up
GO:0048872	homeostasis of number of cells	28/572	256/18866	4.81e-09	6.9e-08	5.01e-08	RIPK3, SASH3, CORO1A, INPP5D, LGALS9, SPI1, HCLS1, IKZF1, TNFSF13B, FCER1G, CSF1, CARD11, CD74, IL2RA, SIT1, NCKAP1L, CCR2, LYN, CCR7, PIK3CD, FOXP3, JAK3, IL7R, PLA2G2A, ANXA1, IL6, HMOX1, IL20RB	28	geneontology_Biological_Process	0.048951	Up
GO:0001776	leukocyte homeostasis	16/572	86/18866	5.62e-09	8e-08	5.8e-08	RIPK3, CORO1A, LGALS9, TNFSF13B, FCER1G, CD74, IL2RA, SIT1, NCKAP1L, CCR2, LYN, PIK3CD, FOXP3, JAK3, ANXA1, IL6	16	geneontology_Biological_Process	0.027972	Up
GO:0002437	inflammatory response to antigenic stimulus	14/572	64/18866	5.62e-09	8e-08	5.8e-08	HLA-E, BTK, FCER1G, IL2RA, HLA-DRB1, CD6, CCR7, C3, CD28, FCGR2B, CD68, PLA2G2D, ICAM1, IL20RB	14	geneontology_Biological_Process	0.0244755	Up
GO:0051607	defense response to virus	28/572	258/18866	5.73e-09	8.12e-08	5.9e-08	RIPK3, IL12RB1, LILRB1, CARD9, TLR8, UNC93B1, NLRP3, RNASE6, PTPRC, PRF1, APOBEC3H, IL2RA, IRF5, TLR7, PYCARD, CXCL9, CD40, CXCL10, IRF1, RNASE2, IFI27, IFITM1, OAS1, BST2, IL6, AIM2, FGL2, OASL	28	geneontology_Biological_Process	0.048951	Up
GO:0032418	lysosome localization	15/572	75/18866	5.96e-09	8.42e-08	6.11e-08	VAMP8, BTK, LGALS9, SYK, LAT2, CD300A, FCER1G, FGR, CD84, RAC2, MILR1, LYN, PIK3CD, STXBP2, HMOX1	15	geneontology_Biological_Process	0.0262238	Up
GO:0002526	acute inflammatory response	18/572	111/18866	6.24e-09	8.79e-08	6.38e-08	HLA-E, BTK, NLRP3, FCER1G, VNN1, CD163, CD6, CCR7, SERPINA1, C3, FCGR2B, PLA2G2D, S100A8, OSM, ICAM1, PTGES, IL6, IL20RB	18	geneontology_Biological_Process	0.0314685	Up
GO:0050830	defense response to Gram-positive bacterium	17/572	99/18866	6.72e-09	9.36e-08	6.8e-08	HLA-E, MPEG1, CARD9, NLRP3, TNFSF8, HAVCR2, RNASE6, FGR, TLR2, LYZ, GBP4, PLA2G2A, C5AR1, IL6, CTSG, ACP5, DEFB1	17	geneontology_Biological_Process	0.0297203	Up
GO:0035747	natural killer cell chemotaxis	7/572	11/18866	6.74e-09	9.36e-08	6.8e-08	CCL4, CCL5, CCL3, XCL1, PIK3CD, CCL2, CXCL14	7	geneontology_Biological_Process	0.0122378	Up
GO:0045060	negative thymic T cell selection	7/572	11/18866	6.74e-09	9.36e-08	6.8e-08	DOCK2, CD3E, PTPRC, ZAP70, CD74, CCR7, CD28	7	geneontology_Biological_Process	0.0122378	Up
GO:0098883	synapse pruning	7/572	11/18866	6.74e-09	9.36e-08	6.8e-08	ITGAM, C1QA, C1QC, C1QB, C3, DKK1, TREM2	7	geneontology_Biological_Process	0.0122378	Up
GO:0033077	T cell differentiation in thymus	15/572	76/18866	7.22e-09	9.97e-08	7.24e-08	RIPK3, DOCK2, CD3D, CD3E, PTPRC, CD3G, ZAP70, CARD11, CD74, VNN1, TESPA1, CCR7, CD28, FOXP3, IL7R	15	geneontology_Biological_Process	0.0262238	Up
GO:0045577	regulation of B cell differentiation	10/572	29/18866	7.23e-09	9.97e-08	7.24e-08	PTPN6, BTK, INPP5D, SYK, NFAM1, CARD11, IKZF3, CD27, NCKAP1L, SLAMF8	10	geneontology_Biological_Process	0.0174825	Up
GO:0002702	positive regulation of production of molecular mediator of immune response	17/572	100/18866	7.87e-09	1.08e-07	7.85e-08	SASH3, IL18, HLA-E, LILRB1, SCIMP, NLRP3, FCER1G, PTPRC, CD74, XCL1, TBX21, CD28, CD40, MZB1, HLA-F, TLR4, IL6	17	geneontology_Biological_Process	0.0297203	Up
GO:0002712	regulation of B cell mediated immunity	13/572	56/18866	9.13e-09	1.25e-07	9.05e-08	PTPN6, HLA-E, BTK, FCER1G, PTPRC, XCL1, TBX21, CR1, C3, CD28, FCGR2B, CD40, FOXP3	13	geneontology_Biological_Process	0.0227273	Up
GO:0002889	regulation of immunoglobulin mediated immune response	13/572	56/18866	9.13e-09	1.25e-07	9.05e-08	PTPN6, HLA-E, BTK, FCER1G, PTPRC, XCL1, TBX21, CR1, C3, CD28, FCGR2B, CD40, FOXP3	13	geneontology_Biological_Process	0.0227273	Up
GO:0032637	interleukin-8 production	17/572	101/18866	9.21e-09	1.25e-07	9.08e-08	CD33, LGALS9, SYK, TLR8, CD2, CD14, PTPRC, CLEC7A, CD74, TLR2, TLR7, PYCARD, FCN1, TLR4, ANXA1, IL6, SERPINE1	17	geneontology_Biological_Process	0.0297203	Up
GO:0032689	negative regulation of interferon-gamma production	11/572	38/18866	1.03e-08	1.4e-07	1.02e-07	LILRB1, LGALS9, HAVCR2, CD96, VSIR, HLA-DRB1, XCL1, FOXP3, TLR4, PDCD1LG2, IL20RB	11	geneontology_Biological_Process	0.0192308	Up
GO:0043372	positive regulation of CD4-positive, alpha-beta T cell differentiation	10/572	30/18866	1.06e-08	1.43e-07	1.03e-07	SASH3, IL18, IL12RB1, LGALS9, NLRP3, CD86, NCKAP1L, FOXP3, CCL19, ANXA1	10	geneontology_Biological_Process	0.0174825	Up
GO:0046638	positive regulation of alpha-beta T cell differentiation	12/572	47/18866	1.07e-08	1.44e-07	1.04e-07	SASH3, IL18, IL12RB1, LGALS9, SYK, NLRP3, CD86, ZAP70, NCKAP1L, FOXP3, CCL19, ANXA1	12	geneontology_Biological_Process	0.020979	Up
GO:0002221	pattern recognition receptor signaling pathway	24/572	201/18866	1.1e-08	1.48e-07	1.07e-07	BTK, CTSS, CYBA, ITGB2, SCIMP, PIK3AP1, TLR8, ITGAM, UNC93B1, CD14, HAVCR2, CD300A, TLR2, TLR7, LYN, LGMN, CD300LF, S100A9, CD40, FCN1, CLEC4E, IRF1, TLR4, S100A8	24	geneontology_Biological_Process	0.041958	Up
GO:0002643	regulation of tolerance induction	8/572	17/18866	1.3e-08	1.73e-07	1.26e-07	LILRB2, HAVCR2, CD3E, IL2RA, HLA-B, PDCD1, FOXP3, IDO1	8	geneontology_Biological_Process	0.013986	Up
GO:0030889	negative regulation of B cell proliferation	8/572	17/18866	1.3e-08	1.73e-07	1.26e-07	BTK, INPP5D, TYROBP, CD300A, LYN, FCGR2B, MNDA, CTLA4	8	geneontology_Biological_Process	0.013986	Up
GO:1903707	negative regulation of hemopoiesis	21/572	158/18866	1.37e-08	1.82e-07	1.32e-07	LILRB4, INPP5D, LILRB1, C1QC, LILRB3, CD74, CCL3, TBX21, LYN, FCGR2B, GPR171, FOXP3, CTLA4, JAK3, IRF1, TLR4, TMEM176B, TMEM176A, ANXA1, FGL2, LAG3	21	geneontology_Biological_Process	0.0367133	Up
GO:0043370	regulation of CD4-positive, alpha-beta T cell differentiation	12/572	48/18866	1.38e-08	1.83e-07	1.33e-07	SASH3, IL18, IL12RB1, LGALS9, NLRP3, CD86, NCKAP1L, TBX21, FOXP3, JAK3, CCL19, ANXA1	12	geneontology_Biological_Process	0.020979	Up
GO:0007249	I-kappaB kinase, NF-kappaB signaling	29/572	286/18866	1.43e-08	1.89e-07	1.37e-07	RIPK3, BTK, LGALS9, CD4, CARD9, TLR8, CD14, CASP1, RHOH, CARD11, CD74, TLR2, HLA-DRB1, FASLG, TLR7, PYCARD, CCR7, APOL3, CD40, TNFSF10, S100A4, UBD, SECTM1, TLR4, CCL19, BST2, HMOX1, S100B, ECM1	29	geneontology_Biological_Process	0.0506993	Up
GO:0002468	dendritic cell antigen processing and presentation	7/572	12/18866	1.58e-08	2.05e-07	1.49e-07	CLEC4A, CD74, CCR7, FCGR2B, CD68, CCL19, FGL2	7	geneontology_Biological_Process	0.0122378	Up
GO:0002517	T cell tolerance induction	7/572	12/18866	1.58e-08	2.05e-07	1.49e-07	LILRB2, CD3E, IL2RA, ICOS, HLA-B, FOXP3, IDO1	7	geneontology_Biological_Process	0.0122378	Up
GO:0043301	negative regulation of leukocyte degranulation	7/572	12/18866	1.58e-08	2.05e-07	1.49e-07	LGALS9, CD300A, CD84, CCR2, FCGR2B, HLA-F, HMOX1	7	geneontology_Biological_Process	0.0122378	Up
GO:0043383	negative T cell selection	7/572	12/18866	1.58e-08	2.05e-07	1.49e-07	DOCK2, CD3E, PTPRC, ZAP70, CD74, CCR7, CD28	7	geneontology_Biological_Process	0.0122378	Up
GO:0050854	regulation of antigen receptor-mediated signaling pathway	14/572	69/18866	1.58e-08	2.05e-07	1.49e-07	PTPN6, LILRB4, LCK, SLA2, CD300A, SH2D1A, NFAM1, PTPRC, UBASH3A, CARD11, TESPA1, LYN, CCR7, FCGR2B	14	geneontology_Biological_Process	0.0244755	Up
GO:0019058	viral life cycle	32/572	341/18866	1.67e-08	2.16e-07	1.57e-07	VAMP8, SELPLG, LGALS9, CD4, SIGLEC1, CD86, CCR5, SLAMF1, CD74, CCL5, CXCR6, APOBEC3H, HLA-DRB1, CCL8, CR1, MRC1, CD209, CD28, FCN1, CCL2, IFI27, IFITM1, ANPEP, CLEC4G, OAS1, ICAM1, APOE, BST2, CD55, OASL, PTX3, SLPI	32	geneontology_Biological_Process	0.0559441	Up
GO:0051209	release of sequestered calcium ion into cytosol	18/572	118/18866	1.69e-08	2.17e-07	1.58e-07	PTPN6, CORO1A, CYBA, TRPM2, LCK, PTPRC, CCR5, FASLG, CCL3, XCL1, LYN, CCR7, P2RY6, CXCL9, CXCL10, CXCL11, CCL19, APLNR	18	geneontology_Biological_Process	0.0314685	Up
GO:0002407	dendritic cell chemotaxis	9/572	24/18866	1.77e-08	2.26e-07	1.64e-07	LGALS9, TRPM2, CCR5, CCL5, CCR1, CCR2, SLAMF8, CCR7, CCL19	9	geneontology_Biological_Process	0.0157343	Up
GO:0002719	negative regulation of cytokine production involved in immune response	9/572	24/18866	1.77e-08	2.26e-07	1.64e-07	LILRB1, CD96, XCL1, TBX21, FOXP3, JAK3, HLA-F, BST2, HMOX1	9	geneontology_Biological_Process	0.0157343	Up
GO:0031342	negative regulation of cell killing	9/572	24/18866	1.77e-08	2.26e-07	1.64e-07	HLA-E, LILRB1, LGALS9, HAVCR2, PTPRC, HLA-B, FCGR2B, HLA-F, IL7R	9	geneontology_Biological_Process	0.0157343	Up
GO:0070231	T cell apoptotic process	12/572	49/18866	1.78e-08	2.27e-07	1.64e-07	RIPK3, LGALS9, GIMAP8, DOCK8, CCL5, IL2RA, CD27, FASLG, PDCD1, JAK3, IL7R, IDO1	12	geneontology_Biological_Process	0.020979	Up
GO:0051283	negative regulation of sequestering of calcium ion	18/572	119/18866	1.93e-08	2.45e-07	1.78e-07	PTPN6, CORO1A, CYBA, TRPM2, LCK, PTPRC, CCR5, FASLG, CCL3, XCL1, LYN, CCR7, P2RY6, CXCL9, CXCL10, CXCL11, CCL19, APLNR	18	geneontology_Biological_Process	0.0314685	Up
GO:0044409	entry into host	20/572	147/18866	2.03e-08	2.56e-07	1.86e-07	VAMP8, SELPLG, LGALS9, CD4, SIGLEC1, CD86, CCR5, SLAMF1, CD74, HLA-DRB1, CR1, MRC1, CD209, FCN1, IFITM1, ANPEP, CLEC4G, ICAM1, CD55, PTX3	20	geneontology_Biological_Process	0.034965	Up
GO:0002724	regulation of T cell cytokine production	10/572	32/18866	2.15e-08	2.7e-07	1.96e-07	SASH3, IL18, NLRP3, TNFRSF1B, XCL1, TBX21, CCR2, FOXP3, HLA-F, IL6	10	geneontology_Biological_Process	0.0174825	Up
GO:0042093	T-helper cell differentiation	13/572	60/18866	2.23e-08	2.8e-07	2.04e-07	IL18, BATF, IL12RB1, NLRP3, SLAMF6, CD86, SPN, TBX21, FOXP3, JAK3, CCL19, ANXA1, IL6	13	geneontology_Biological_Process	0.0227273	Up
GO:0002711	positive regulation of T cell mediated immunity	12/572	50/18866	2.28e-08	2.85e-07	2.07e-07	SASH3, IL18, HLA-E, IL12RB1, NLRP3, PTPRC, HLA-B, XCL1, FOXP3, HLA-F, IL6, CD1C	12	geneontology_Biological_Process	0.020979	Up
GO:0051282	regulation of sequestering of calcium ion	18/572	121/18866	2.53e-08	3.15e-07	2.29e-07	PTPN6, CORO1A, CYBA, TRPM2, LCK, PTPRC, CCR5, FASLG, CCL3, XCL1, LYN, CCR7, P2RY6, CXCL9, CXCL10, CXCL11, CCL19, APLNR	18	geneontology_Biological_Process	0.0314685	Up
GO:0050663	cytokine secretion	14/572	72/18866	2.81e-08	3.49e-07	2.53e-07	LCP2, SYK, TLR8, NLRP3, CD14, FGR, TLR2, SRGN, LYN, CRTAM, FCGR2B, FOXP3, CLEC4E, LRRC32	14	geneontology_Biological_Process	0.0244755	Up
GO:0043277	apoptotic cell clearance	12/572	51/18866	2.9e-08	3.6e-07	2.61e-07	TYROBP, RHOH, RAC2, CCR2, CD300LF, C3, FCN1, C2, MARCO, CCL2, ANXA1, TREM2	12	geneontology_Biological_Process	0.020979	Up
GO:0002861	regulation of inflammatory response to antigenic stimulus	10/572	33/18866	3e-08	3.7e-07	2.69e-07	HLA-E, BTK, FCER1G, HLA-DRB1, CCR7, C3, CD28, FCGR2B, PLA2G2D, IL20RB	10	geneontology_Biological_Process	0.0174825	Up
GO:0046006	regulation of activated T cell proliferation	11/572	42/18866	3.3e-08	4.06e-07	2.95e-07	RIPK3, IL18, IL12RB1, LGALS9, IL2RA, PYCARD, CRTAM, FOXP3, PDCD1LG2, LRRC32, TNFSF9	11	geneontology_Biological_Process	0.0192308	Up
GO:1902563	regulation of neutrophil activation	7/572	13/18866	3.33e-08	4.06e-07	2.95e-07	PTAFR, ITGB2, SYK, ITGAM, CD300A, FCGR2B, PLA2G2A	7	geneontology_Biological_Process	0.0122378	Up
GO:2001198	regulation of dendritic cell differentiation	7/572	13/18866	3.33e-08	4.06e-07	2.95e-07	LILRB1, LGALS9, LILRB2, HLA-B, FCGR2B, TMEM176B, TMEM176A	7	geneontology_Biological_Process	0.0122378	Up
GO:0019730	antimicrobial humoral response	19/572	137/18866	3.34e-08	4.06e-07	2.95e-07	HLA-E, RNASE6, S100A9, CXCL9, JCHAIN, LYZ, CXCL10, CXCL11, CCL13, CXCL13, GNLY, PLA2G2A, S100A8, CXCL1, CTSG, SLPI, PI3, DEFB1, CXCL14	19	geneontology_Biological_Process	0.0332168	Up
GO:0030183	B cell differentiation	19/572	137/18866	3.34e-08	4.06e-07	2.95e-07	PTPN6, BTK, INPP5D, MFNG, SYK, NFAM1, PTPRC, LYL1, CARD11, IKZF3, CD27, NCKAP1L, SLAMF8, FCGR2B, CMTM7, JAK3, CD79A, CD79B, IL6	19	geneontology_Biological_Process	0.0332168	Up
GO:0030101	natural killer cell activation	15/572	85/18866	3.55e-08	4.31e-07	3.13e-07	IL18, HLA-E, CORO1A, ITGB2, CD2, TYROBP, HAVCR2, FGR, PTPRC, NCR3, SLAMF7, ZNF683, PIK3CD, IL21R, HLA-F	15	geneontology_Biological_Process	0.0262238	Up
GO:0071622	regulation of granulocyte chemotaxis	12/572	52/18866	3.67e-08	4.44e-07	3.22e-07	CSF1R, C3AR1, CSF1, RAC2, CD74, CCL5, NCKAP1L, XCL1, CCR7, CMKLR1, CCL19, C5AR1	12	geneontology_Biological_Process	0.020979	Up
GO:0051208	sequestering of calcium ion	18/572	124/18866	3.73e-08	4.5e-07	3.26e-07	PTPN6, CORO1A, CYBA, TRPM2, LCK, PTPRC, CCR5, FASLG, CCL3, XCL1, LYN, CCR7, P2RY6, CXCL9, CXCL10, CXCL11, CCL19, APLNR	18	geneontology_Biological_Process	0.0314685	Up
GO:0090026	positive regulation of monocyte chemotaxis	8/572	19/18866	3.83e-08	4.6e-07	3.34e-07	AIF1, CCL5, CCR1, CCR2, LGMN, CXCL10, CXCL12, SERPINE1	8	geneontology_Biological_Process	0.013986	Up
GO:0071347	cellular response to interleukin-1	22/572	183/18866	3.98e-08	4.76e-07	3.46e-07	PSMB10, CCL4, CCL5, CCL3, CCL8, XCL2, PYCARD, XCL1, CCL23, CCL3L1, CD40, MAP3K8, CCL13, CCL2, PSMB9, CCL19, CCL17, ICAM1, IL6, CCL18, TFPI, CCL26	22	geneontology_Biological_Process	0.0384615	Up
GO:0032743	positive regulation of interleukin-2 production	9/572	26/18866	4.01e-08	4.78e-07	3.47e-07	SASH3, CD4, CD86, PTPRC, CLEC7A, CARD11, CCR2, CD28, ANXA1	9	geneontology_Biological_Process	0.0157343	Up
GO:0070232	regulation of T cell apoptotic process	10/572	34/18866	4.13e-08	4.91e-07	3.57e-07	RIPK3, LGALS9, GIMAP8, DOCK8, CCL5, CD27, PDCD1, JAK3, IL7R, IDO1	10	geneontology_Biological_Process	0.0174825	Up
GO:0002369	T cell cytokine production	11/572	43/18866	4.31e-08	5.12e-07	3.71e-07	SASH3, IL18, NLRP3, TNFRSF1B, XCL1, TBX21, CCR2, FOXP3, HLA-F, IL6, CD55	11	geneontology_Biological_Process	0.0192308	Up
GO:0002474	antigen processing and presentation of peptide antigen via MHC class I	16/572	99/18866	4.56e-08	5.4e-07	3.92e-07	NCF1, VAMP8, HLA-E, NCF4, CYBA, PSMB10, CYBB, FCGR1B, FCER1G, FCGR1A, CLEC4A, NCF2, HLA-B, HLA-C, HLA-F, PSMB9	16	geneontology_Biological_Process	0.027972	Up
GO:0097553	calcium ion transmembrane import into cytosol	19/572	140/18866	4.77e-08	5.62e-07	4.08e-07	PTPN6, CORO1A, CYBA, TRPM2, LCK, PTPRC, CCR5, FASLG, CCL3, XCL1, LYN, CCR7, P2RY6, CXCL9, CXCL10, CXCL11, CCL19, RAMP3, APLNR	19	geneontology_Biological_Process	0.0332168	Up
GO:0002479	antigen processing and presentation of exogenous peptide antigen via MHC class I, TAP-dependent	14/572	75/18866	4.84e-08	5.68e-07	4.12e-07	NCF1, VAMP8, HLA-E, NCF4, CYBA, PSMB10, CYBB, FCGR1B, FCGR1A, NCF2, HLA-B, HLA-C, HLA-F, PSMB9	14	geneontology_Biological_Process	0.0244755	Up
GO:0032602	chemokine production	14/572	75/18866	4.84e-08	5.68e-07	4.12e-07	IL18, LGALS9, SYK, HAVCR2, CLEC7A, CD74, TLR2, TLR7, S100A9, TLR4, S100A8, ACKR1, IL6, TREM2	14	geneontology_Biological_Process	0.0244755	Up
GO:0052548	regulation of endopeptidase activity	36/572	434/18866	5.23e-08	6.12e-07	4.44e-07	LGALS9, SYK, CARD9, LCK, NLRP3, CASP1, VSIR, CLEC7A, CD27, CST7, FASLG, PYCARD, LYN, CR1, LGMN, SERPINA1, S100A9, C3, SERPING1, TNFSF10, RENBP, CSTA, RARRES1, PSMB9, CST3, S100A8, LXN, BST2, AIM2, SPOCK2, TFPI, PLAUR, SLPI, SERPINE1, PI3, MMP9	36	geneontology_Biological_Process	0.0629371	Up
GO:0008360	regulation of cell shape	20/572	156/18866	5.6e-08	6.53e-07	4.74e-07	FGD3, LST1, FGD2, HCK, CORO1A, ITGB2, FMNL1, CSF1R, FGR, RHOH, RAC2, CCL3, ARHGAP15, CCL13, CCL2, CDC42EP2, ICAM1, ANXA1, S100B, PDPN	20	geneontology_Biological_Process	0.034965	Up
GO:0009620	response to fungus	12/572	54/18866	5.77e-08	6.71e-07	4.87e-07	BTK, SCIMP, SYK, CARD9, CLEC7A, S100A9, GNLY, TLR4, S100A8, PTX3, PLA2G5, CTSG	12	geneontology_Biological_Process	0.020979	Up
GO:0051924	regulation of calcium ion transport	26/572	253/18866	6.13e-08	7.11e-07	5.16e-07	PTPN6, CORO1A, CD33, LILRB1, CYBA, CD4, LILRB2, IL16, CCL4, CD84, CCL5, CCR1, CCL3, XCL1, LYN, P2RY6, STAC3, CXCL9, CXCL10, CXCL11, LILRA5, CCL2, RAMP3, ICAM1, CXCL12, APLNR	26	geneontology_Biological_Process	0.0454545	Up
GO:0002544	chronic inflammatory response	8/572	20/18866	6.21e-08	7.17e-07	5.21e-07	CCL5, VNN1, S100A9, FOXP3, CXCL13, S100A8, IDO1, PTGES	8	geneontology_Biological_Process	0.013986	Up
GO:0001771	immunological synapse formation	7/572	14/18866	6.48e-08	7.42e-07	5.38e-07	DOCK2, HAVCR2, DOCK8, PRF1, CD6, CCR7, CCL19	7	geneontology_Biological_Process	0.0122378	Up
GO:0035589	G protein-coupled purinergic nucleotide receptor signaling pathway	7/572	14/18866	6.48e-08	7.42e-07	5.38e-07	PTAFR, P2RY13, P2RY8, GPR34, P2RY6, P2RY10, GPR171	7	geneontology_Biological_Process	0.0122378	Up
GO:0045059	positive thymic T cell selection	7/572	14/18866	6.48e-08	7.42e-07	5.38e-07	DOCK2, CD3D, CD3E, PTPRC, CD3G, ZAP70, CD74	7	geneontology_Biological_Process	0.0122378	Up
GO:0060402	calcium ion transport into cytosol	20/572	158/18866	6.95e-08	7.93e-07	5.76e-07	PTPN6, CORO1A, CYBA, CD4, TRPM2, LCK, PTPRC, CCR5, FASLG, CCL3, XCL1, LYN, CCR7, P2RY6, CXCL9, CXCL10, CXCL11, CCL19, RAMP3, APLNR	20	geneontology_Biological_Process	0.034965	Up
GO:0002720	positive regulation of cytokine production involved in immune response	12/572	55/18866	7.18e-08	8.17e-07	5.93e-07	SASH3, IL18, HLA-E, LILRB1, SCIMP, NLRP3, FCER1G, CD74, XCL1, HLA-F, TLR4, IL6	12	geneontology_Biological_Process	0.020979	Up
GO:0002218	activation of innate immune response	19/572	144/18866	7.55e-08	8.54e-07	6.2e-07	HCK, PSMB10, SYK, CARD9, FCER1G, ICAM3, CLEC4A, CARD11, PYHIN1, CLEC10A, PYCARD, LYN, CD209, FCN1, MNDA, CLEC4E, PSMB9, TLR4, AIM2	19	geneontology_Biological_Process	0.0332168	Up
GO:0002701	negative regulation of production of molecular mediator of immune response	10/572	36/18866	7.58e-08	8.54e-07	6.2e-07	LILRB1, CD96, XCL1, TBX21, FCGR2B, FOXP3, JAK3, HLA-F, BST2, HMOX1	10	geneontology_Biological_Process	0.0174825	Up
GO:0042554	superoxide anion generation	10/572	36/18866	7.58e-08	8.54e-07	6.2e-07	NCF1, CYBA, ITGB2, SYK, ITGAM, CYBB, TYROBP, CLEC7A, NCF2, ACP5	10	geneontology_Biological_Process	0.0174825	Up
GO:0019722	calcium-mediated signaling	24/572	222/18866	7.59e-08	8.54e-07	6.2e-07	BTK, CD4, TRPM2, SYK, LAT2, CXCR3, CCRL2, CD3E, SLA2, CCL4, TBC1D10C, PTPRC, CCR5, ZAP70, CCR1, CXCR6, CCL3, CCR2, CCR7, PLEK, P2RY6, CMKLR1, TREM2, DEFB1	24	geneontology_Biological_Process	0.041958	Up
GO:0045123	cellular extravasation	13/572	67/18866	9.03e-08	1.01e-06	7.36e-07	RIPK3, PTAFR, SELPLG, JAML, ITGB2, ITGAL, SELL, SPN, CCR2, PIK3CD, CCL2, ICAM1, CXCL12	13	geneontology_Biological_Process	0.0227273	Up
GO:0038093	Fc receptor signaling pathway	25/572	241/18866	9.17e-08	1.03e-06	7.45e-07	VAV1, LCP2, WAS, HCK, BTK, PSMB10, SYK, FCGR1B, LAT2, CD247, FCER1G, FGR, MYO1G, PTPRC, FCGR1A, CD3G, CD200R1, CARD11, NCKAP1L, LYN, FCGR3A, FCGR2A, FCGR2B, CLEC4E, PSMB9	25	geneontology_Biological_Process	0.0437063	Up
GO:0050798	activated T cell proliferation	11/572	46/18866	9.21e-08	1.03e-06	7.45e-07	RIPK3, IL18, IL12RB1, LGALS9, IL2RA, PYCARD, CRTAM, FOXP3, PDCD1LG2, LRRC32, TNFSF9	11	geneontology_Biological_Process	0.0192308	Up
GO:0140131	positive regulation of lymphocyte chemotaxis	8/572	21/18866	9.77e-08	1.09e-06	7.89e-07	CCL4, CCL5, CCL3, XCL2, XCL1, CCR2, CXCL13, CXCL14	8	geneontology_Biological_Process	0.013986	Up
GO:0006816	calcium ion transport	35/572	426/18866	1.02e-07	1.13e-06	8.19e-07	PTPN6, CORO1A, CD33, LILRB1, CYBA, CD4, TRPM2, LILRB2, LCK, IL16, CCL4, PTPRC, CCR5, CD84, CCL5, CCR1, TMEM37, FASLG, CCL3, CCL8, XCL1, LYN, CCR7, P2RY6, STAC3, CXCL9, CXCL10, CXCL11, LILRA5, CCL2, CCL19, RAMP3, ICAM1, CXCL12, APLNR	35	geneontology_Biological_Process	0.0611888	Up
GO:1905517	macrophage migration	12/572	57/18866	1.1e-07	1.21e-06	8.79e-07	CSF1R, C3AR1, CSF1, CD200R1, CCL5, CCL3, CCR2, SLAMF8, CMKLR1, CCL2, C5AR1, TREM2	12	geneontology_Biological_Process	0.020979	Up
GO:0001773	myeloid dendritic cell activation	9/572	29/18866	1.18e-07	1.31e-06	9.48e-07	BATF, SPI1, DOCK2, CD2, HAVCR2, SLAMF1, PYCARD, BATF2, UBD	9	geneontology_Biological_Process	0.0157343	Up
GO:0050853	B cell receptor signaling pathway	18/572	135/18866	1.41e-07	1.55e-06	1.13e-06	PTPN6, BTK, SYK, LCK, LAT2, CD300A, NFAM1, PTPRC, CD38, NCKAP1L, LYN, PIK3CD, FCGR2B, MNDA, CTLA4, CD79A, IGLL5, CD79B	18	geneontology_Biological_Process	0.0314685	Up
GO:0002664	regulation of T cell tolerance induction	6/572	10/18866	1.43e-07	1.57e-06	1.14e-06	LILRB2, CD3E, IL2RA, HLA-B, FOXP3, IDO1	6	geneontology_Biological_Process	0.0104895	Up
GO:0002887	negative regulation of myeloid leukocyte mediated immunity	6/572	10/18866	1.43e-07	1.57e-06	1.14e-06	LGALS9, CD300A, CD84, CCR2, FCGR2B, HMOX1	6	geneontology_Biological_Process	0.0104895	Up
GO:0033628	regulation of cell adhesion mediated by integrin	11/572	48/18866	1.48e-07	1.61e-06	1.17e-06	PTPN6, FERMT3, SYK, SKAP1, CD3E, CCL5, NCKAP1L, LYN, CXCL13, PLAU, SERPINE1	11	geneontology_Biological_Process	0.0192308	Up
GO:0050707	regulation of cytokine secretion	12/572	59/18866	1.64e-07	1.78e-06	1.3e-06	SYK, TLR8, CD14, FGR, TLR2, SRGN, LYN, CRTAM, FCGR2B, FOXP3, CLEC4E, LRRC32	12	geneontology_Biological_Process	0.020979	Up
GO:0002761	regulation of myeloid leukocyte differentiation	17/572	123/18866	1.85e-07	2e-06	1.45e-06	LILRB4, INPP5D, LILRB1, CD4, HCLS1, EVI2B, TYROBP, C1QC, LILRB3, CSF1, CD74, CCR1, HLA-DRB1, CCL3, LYN, TLR4, TREM2	17	geneontology_Biological_Process	0.0297203	Up
GO:0002673	regulation of acute inflammatory response	11/572	49/18866	1.85e-07	2e-06	1.45e-06	HLA-E, BTK, NLRP3, FCER1G, CCR7, C3, FCGR2B, PLA2G2D, OSM, IL6, IL20RB	11	geneontology_Biological_Process	0.0192308	Up
GO:0033627	cell adhesion mediated by integrin	13/572	71/18866	1.85e-07	2e-06	1.45e-06	PTPN6, FERMT3, ITGB2, SYK, SKAP1, CD3E, CCL5, NCKAP1L, LYN, CXCL13, PLAU, ICAM1, SERPINE1	13	geneontology_Biological_Process	0.0227273	Up
GO:0051651	maintenance of location in cell	23/572	216/18866	1.87e-07	2.01e-06	1.46e-06	PTPN6, CORO1A, CYBA, CD4, TRPM2, LCK, PTPRC, CCR5, FASLG, SRGN, CCL3, XCL1, LYN, CCR7, S100A9, P2RY6, CXCL9, CXCL10, CXCL11, CCL19, S100A8, APOE, APLNR	23	geneontology_Biological_Process	0.0402098	Up
GO:0002830	positive regulation of type 2 immune response	7/572	16/18866	2.05e-07	2.2e-06	1.59e-06	IL18, NLRP3, CD86, CD74, XCL1, IDO1, IL6	7	geneontology_Biological_Process	0.0122378	Up
GO:0052126	movement in host environment	20/572	169/18866	2.13e-07	2.28e-06	1.66e-06	VAMP8, SELPLG, LGALS9, CD4, SIGLEC1, CD86, CCR5, SLAMF1, CD74, HLA-DRB1, CR1, MRC1, CD209, FCN1, IFITM1, ANPEP, CLEC4G, ICAM1, CD55, PTX3	20	geneontology_Biological_Process	0.034965	Up
GO:0032693	negative regulation of interleukin-10 production	8/572	23/18866	2.23e-07	2.37e-06	1.72e-06	LILRB1, TYROBP, VSIR, FCGR2B, FOXP3, JAK3, IDO1, PDCD1LG2	8	geneontology_Biological_Process	0.013986	Up
GO:0072677	eosinophil migration	8/572	23/18866	2.23e-07	2.37e-06	1.72e-06	CD300A, CCL4, CCL5, CCL3, CCL8, CCL13, CCL2, CCL26	8	geneontology_Biological_Process	0.013986	Up
GO:0043123	positive regulation of I-kappaB kinase, NF-kappaB signaling	21/572	188/18866	2.85e-07	3.02e-06	2.2e-06	LGALS9, CD4, CARD9, CASP1, CARD11, CD74, HLA-DRB1, FASLG, CCR7, APOL3, CD40, TNFSF10, S100A4, UBD, SECTM1, TLR4, CCL19, BST2, HMOX1, S100B, ECM1	21	geneontology_Biological_Process	0.0367133	Up
GO:0002604	regulation of dendritic cell antigen processing and presentation	6/572	11/18866	3.07e-07	3.23e-06	2.35e-06	CD74, CCR7, FCGR2B, CD68, CCL19, FGL2	6	geneontology_Biological_Process	0.0104895	Up
GO:0097048	dendritic cell apoptotic process	6/572	11/18866	3.07e-07	3.23e-06	2.35e-06	LILRB1, LGALS9, LYN, CCR7, CCL19, CXCL12	6	geneontology_Biological_Process	0.0104895	Up
GO:2000668	regulation of dendritic cell apoptotic process	6/572	11/18866	3.07e-07	3.23e-06	2.35e-06	LILRB1, LGALS9, LYN, CCR7, CCL19, CXCL12	6	geneontology_Biological_Process	0.0104895	Up
GO:0045954	positive regulation of natural killer cell mediated cytotoxicity	8/572	24/18866	3.26e-07	3.42e-06	2.48e-06	VAV1, HLA-E, SLAMF6, SH2D1A, NCR3, CRTAM, HLA-F, LAG3	8	geneontology_Biological_Process	0.013986	Up
GO:0002716	negative regulation of natural killer cell mediated immunity	7/572	17/18866	3.39e-07	3.54e-06	2.57e-06	HLA-E, LILRB1, LGALS9, HAVCR2, CD96, HLA-B, HLA-F	7	geneontology_Biological_Process	0.0122378	Up
GO:0006957	complement activation, alternative pathway	7/572	17/18866	3.39e-07	3.54e-06	2.57e-06	CFP, VSIG4, CR1, C3, CFD, CFB, CFH	7	geneontology_Biological_Process	0.0122378	Up
GO:1902622	regulation of neutrophil migration	10/572	42/18866	3.72e-07	3.88e-06	2.81e-06	C3AR1, RHOH, RAC2, CD74, NCKAP1L, XCL1, SLAMF8, CCR7, CCL19, C5AR1	10	geneontology_Biological_Process	0.0174825	Up
GO:0030449	regulation of complement activation	16/572	115/18866	3.86e-07	4.01e-06	2.91e-06	C1QA, C1QC, C1QB, C3AR1, CFP, VSIG4, CR1, C3, SERPING1, C2, C1S, C1R, C5AR1, CFB, CD55, CFH	16	geneontology_Biological_Process	0.027972	Up
GO:0014068	positive regulation of phosphatidylinositol 3-kinase signaling	14/572	88/18866	3.87e-07	4.01e-06	2.91e-06	NCF1, PTPN6, IL18, PIK3R5, PIK3AP1, HCLS1, HCST, FGR, CCL5, LYN, PIK3CD, CD28, OSM, DCN	14	geneontology_Biological_Process	0.0244755	Up
GO:0018108	peptidyl-tyrosine phosphorylation	31/572	374/18866	4.54e-07	4.7e-06	3.41e-06	NCF1, PTPN6, IL18, HCK, BTK, CD4, ITGB2, SYK, SLA, HCLS1, LCK, CSF1R, SAMSN1, CD3E, CD300A, FGR, PTPRC, FCGR1A, ZAP70, CD74, CCL5, LYN, CD40, JAK3, TNFRSF18, LILRA5, OSM, ICAM1, IL6, EFEMP1, TREM2	31	geneontology_Biological_Process	0.0541958	Up
GO:0043302	positive regulation of leukocyte degranulation	8/572	25/18866	4.66e-07	4.79e-06	3.48e-06	VAMP8, PTAFR, ITGB2, SYK, ITGAM, FCER1G, FGR, HLA-F	8	geneontology_Biological_Process	0.013986	Up
GO:0071677	positive regulation of mononuclear cell migration	8/572	25/18866	4.66e-07	4.79e-06	3.48e-06	AIF1, CCL5, CCR1, CCR2, LGMN, CXCL10, CXCL12, SERPINE1	8	geneontology_Biological_Process	0.013986	Up
GO:0050856	regulation of T cell receptor signaling pathway	10/572	43/18866	4.72e-07	4.83e-06	3.5e-06	PTPN6, LILRB4, LCK, SLA2, CD300A, SH2D1A, UBASH3A, CARD11, TESPA1, CCR7	10	geneontology_Biological_Process	0.0174825	Up
GO:0150077	regulation of neuroinflammatory response	10/572	43/18866	4.72e-07	4.83e-06	3.5e-06	IL18, TNFRSF1B, PTPRC, CTSC, CD200R1, CST7, CCL3, IL6, TREM2, MMP9	10	geneontology_Biological_Process	0.0174825	Up
GO:0060401	cytosolic calcium ion transport	20/572	178/18866	4.97e-07	5.06e-06	3.68e-06	PTPN6, CORO1A, CYBA, CD4, TRPM2, LCK, PTPRC, CCR5, FASLG, CCL3, XCL1, LYN, CCR7, P2RY6, CXCL9, CXCL10, CXCL11, CCL19, RAMP3, APLNR	20	geneontology_Biological_Process	0.034965	Up
GO:2001185	regulation of CD8-positive, alpha-beta T cell activation	7/572	18/18866	5.4e-07	5.48e-06	3.98e-06	HLA-E, LILRB1, VSIR, NCKAP1L, XCL1, CRTAM, IRF1	7	geneontology_Biological_Process	0.0122378	Up
GO:0018212	peptidyl-tyrosine modification	31/572	377/18866	5.4e-07	5.48e-06	3.98e-06	NCF1, PTPN6, IL18, HCK, BTK, CD4, ITGB2, SYK, SLA, HCLS1, LCK, CSF1R, SAMSN1, CD3E, CD300A, FGR, PTPRC, FCGR1A, ZAP70, CD74, CCL5, LYN, CD40, JAK3, TNFRSF18, LILRA5, OSM, ICAM1, IL6, EFEMP1, TREM2	31	geneontology_Biological_Process	0.0541958	Up
GO:0050728	negative regulation of inflammatory response	21/572	196/18866	5.73e-07	5.8e-06	4.21e-06	TNFAIP8L2, AOAH, ALOX5, NLRP3, TNFRSF1B, PTPRC, CD200R1, IL2RA, CST7, HLA-DRB1, PYCARD, SLAMF8, FCGR2B, SIGLEC10, FOXP3, METRNL, APOE, NT5E, IL20RB, TNFAIP6, ACP5	21	geneontology_Biological_Process	0.0367133	Up
GO:1905521	regulation of macrophage migration	10/572	44/18866	5.95e-07	5.99e-06	4.35e-06	CSF1R, C3AR1, CSF1, CD200R1, CCL5, CCL3, SLAMF8, CMKLR1, C5AR1, TREM2	10	geneontology_Biological_Process	0.0174825	Up
GO:0002863	positive regulation of inflammatory response to antigenic stimulus	6/572	12/18866	5.99e-07	5.99e-06	4.35e-06	HLA-E, BTK, FCER1G, CCR7, C3, CD28	6	geneontology_Biological_Process	0.0104895	Up
GO:0032494	response to peptidoglycan	6/572	12/18866	5.99e-07	5.99e-06	4.35e-06	CARD9, NLRP3, IRF5, C5AR1, IL6, TREM2	6	geneontology_Biological_Process	0.0104895	Up
GO:0033004	negative regulation of mast cell activation	6/572	12/18866	5.99e-07	5.99e-06	4.35e-06	LGALS9, CD300A, CD84, MILR1, CD300LF, HMOX1	6	geneontology_Biological_Process	0.0104895	Up
GO:0032720	negative regulation of tumor necrosis factor production	11/572	55/18866	6.45e-07	6.44e-06	4.68e-06	PTPN6, CD33, LGALS9, HAVCR2, SLAMF1, VSIR, CLEC4A, FOXP3, TLR4, TREM2, ACP5	11	geneontology_Biological_Process	0.0192308	Up
GO:0090023	positive regulation of neutrophil chemotaxis	8/572	26/18866	6.56e-07	6.52e-06	4.73e-06	C3AR1, RAC2, CD74, NCKAP1L, XCL1, CCR7, CCL19, C5AR1	8	geneontology_Biological_Process	0.013986	Up
GO:1905523	positive regulation of macrophage migration	8/572	26/18866	6.56e-07	6.52e-06	4.73e-06	CSF1R, C3AR1, CSF1, CCL5, CCL3, CMKLR1, C5AR1, TREM2	8	geneontology_Biological_Process	0.013986	Up
GO:0043373	CD4-positive, alpha-beta T cell lineage commitment	7/572	19/18866	8.33e-07	8.22e-06	5.96e-06	BATF, IL12RB1, SLAMF6, SPN, TBX21, FOXP3, IL6	7	geneontology_Biological_Process	0.0122378	Up
GO:0048245	eosinophil chemotaxis	7/572	19/18866	8.33e-07	8.22e-06	5.96e-06	CCL4, CCL5, CCL3, CCL8, CCL13, CCL2, CCL26	7	geneontology_Biological_Process	0.0122378	Up
GO:0150146	cell junction disassembly	7/572	19/18866	8.33e-07	8.22e-06	5.96e-06	ITGAM, C1QA, C1QC, C1QB, C3, DKK1, TREM2	7	geneontology_Biological_Process	0.0122378	Up
GO:0051928	positive regulation of calcium ion transport	16/572	122/18866	8.73e-07	8.59e-06	6.23e-06	CD4, CCL4, CCL5, CCR1, CCL3, XCL1, P2RY6, STAC3, CXCL9, CXCL10, CXCL11, LILRA5, CCL2, RAMP3, CXCL12, APLNR	16	geneontology_Biological_Process	0.027972	Up
GO:0002825	regulation of T-helper 1 type immune response	8/572	27/18866	9.07e-07	8.9e-06	6.46e-06	IL18, IL12RB1, HAVCR2, XCL1, CCR2, JAK3, CCL19, ANXA1	8	geneontology_Biological_Process	0.013986	Up
GO:0002755	MyD88-dependent toll-like receptor signaling pathway	9/572	36/18866	9.21e-07	8.99e-06	6.53e-06	BTK, TLR8, CD14, CD300A, TLR2, TLR7, CD300LF, IRF1, TLR4	9	geneontology_Biological_Process	0.0157343	Up
GO:0045622	regulation of T-helper cell differentiation	9/572	36/18866	9.21e-07	8.99e-06	6.53e-06	IL18, IL12RB1, NLRP3, CD86, TBX21, FOXP3, JAK3, CCL19, ANXA1	9	geneontology_Biological_Process	0.0157343	Up
GO:1903556	negative regulation of tumor necrosis factor superfamily cytokine production	11/572	57/18866	9.41e-07	9.17e-06	6.65e-06	PTPN6, CD33, LGALS9, HAVCR2, SLAMF1, VSIR, CLEC4A, FOXP3, TLR4, TREM2, ACP5	11	geneontology_Biological_Process	0.0192308	Up
GO:0007599	hemostasis	29/572	348/18866	9.58e-07	9.31e-06	6.76e-06	PTPN6, VAV1, LCP2, WAS, PIK3R5, FERMT3, GNA15, SYK, LCK, FCER1G, DOCK8, LYN, SERPINA1, PLEK, SERPING1, ZNF385A, CD40, F13A1, IRF1, TLR4, PLAU, PAPSS2, APOE, PROCR, IL6, TFPI, PLAUR, SERPINE1, PDPN	29	geneontology_Biological_Process	0.0506993	Up
GO:0002430	complement receptor mediated signaling pathway	6/572	13/18866	1.08e-06	1.05e-05	7.6e-06	C3AR1, FPR1, CR1, FPR3, CMKLR1, C5AR1	6	geneontology_Biological_Process	0.0104895	Up
GO:0002921	negative regulation of humoral immune response	6/572	13/18866	1.08e-06	1.05e-05	7.6e-06	PTPN6, VSIG4, CR1, SERPING1, FCGR2B, CD55	6	geneontology_Biological_Process	0.0104895	Up
GO:0070838	divalent metal ion transport	35/572	471/18866	1.1e-06	1.06e-05	7.69e-06	PTPN6, CORO1A, CD33, LILRB1, CYBA, CD4, TRPM2, LILRB2, LCK, IL16, CCL4, PTPRC, CCR5, CD84, CCL5, CCR1, TMEM37, FASLG, CCL3, CCL8, XCL1, LYN, CCR7, P2RY6, STAC3, CXCL9, CXCL10, CXCL11, LILRA5, CCL2, CCL19, RAMP3, ICAM1, CXCL12, APLNR	35	geneontology_Biological_Process	0.0611888	Up
GO:0030225	macrophage differentiation	10/572	47/18866	1.14e-06	1.1e-05	7.98e-06	CD4, SPI1, HCLS1, CSF1R, C1QC, CSF1, TLR2, NRROS, HLA-DRB1, MMP9	10	geneontology_Biological_Process	0.0174825	Up
GO:0043030	regulation of macrophage activation	11/572	59/18866	1.35e-06	1.29e-05	9.38e-06	HAVCR2, PTPRC, CTSC, CD74, VSIG4, CST7, CCL3, FCGR2B, TLR4, IL6, TREM2	11	geneontology_Biological_Process	0.0192308	Up
GO:0046456	icosanoid biosynthetic process	11/572	59/18866	1.35e-06	1.29e-05	9.38e-06	SYK, TBXAS1, ALOX5, GGTA1, CD74, ALOX5AP, GGT5, HPGDS, PTGES, ANXA1, PLA2G5	11	geneontology_Biological_Process	0.0192308	Up
GO:0006911	phagocytosis, engulfment	16/572	126/18866	1.35e-06	1.29e-05	9.38e-06	BIN2, ITGB2, AIF1, ITGAM, CD300A, FCER1G, FCGR1A, RHOH, RAC2, NCKAP1L, MSR1, C3, FCGR2B, MARCO, IGLL5, TREM2	16	geneontology_Biological_Process	0.027972	Up
GO:0038094	Fc-gamma receptor signaling pathway	17/572	142/18866	1.47e-06	1.4e-05	1.01e-05	VAV1, WAS, HCK, SYK, CD247, FCER1G, FGR, MYO1G, PTPRC, FCGR1A, CD3G, NCKAP1L, LYN, FCGR3A, FCGR2A, FCGR2B, CLEC4E	17	geneontology_Biological_Process	0.0297203	Up
GO:0072511	divalent inorganic cation transport	35/572	478/18866	1.54e-06	1.46e-05	1.06e-05	PTPN6, CORO1A, CD33, LILRB1, CYBA, CD4, TRPM2, LILRB2, LCK, IL16, CCL4, PTPRC, CCR5, CD84, CCL5, CCR1, TMEM37, FASLG, CCL3, CCL8, XCL1, LYN, CCR7, P2RY6, STAC3, CXCL9, CXCL10, CXCL11, LILRA5, CCL2, CCL19, RAMP3, ICAM1, CXCL12, APLNR	35	geneontology_Biological_Process	0.0611888	Up
GO:0002717	positive regulation of natural killer cell mediated immunity	8/572	29/18866	1.66e-06	1.57e-05	1.14e-05	VAV1, HLA-E, SLAMF6, SH2D1A, NCR3, CRTAM, HLA-F, LAG3	8	geneontology_Biological_Process	0.013986	Up
GO:0019835	cytolysis	8/572	29/18866	1.66e-06	1.57e-05	1.14e-05	GZMA, PRF1, GZMH, GZMM, LYZ, GZMB, APOL1, PLA2G2A	8	geneontology_Biological_Process	0.013986	Up
GO:0071624	positive regulation of granulocyte chemotaxis	8/572	29/18866	1.66e-06	1.57e-05	1.14e-05	C3AR1, RAC2, CD74, NCKAP1L, XCL1, CCR7, CCL19, C5AR1	8	geneontology_Biological_Process	0.013986	Up
GO:0002363	alpha-beta T cell lineage commitment	7/572	21/18866	1.82e-06	1.71e-05	1.24e-05	BATF, IL12RB1, SLAMF6, SPN, TBX21, FOXP3, IL6	7	geneontology_Biological_Process	0.0122378	Up
GO:0033630	positive regulation of cell adhesion mediated by integrin	7/572	21/18866	1.82e-06	1.71e-05	1.24e-05	PTPN6, SYK, SKAP1, CD3E, CCL5, NCKAP1L, CXCL13	7	geneontology_Biological_Process	0.0122378	Up
GO:0002576	platelet degranulation	16/572	129/18866	1.86e-06	1.74e-05	1.26e-05	FERMT3, SYK, FCER1G, CTSW, SRGN, LYN, SERPINA1, PLEK, SERPING1, STXBP2, F13A1, CFD, CLEC3B, SERPINE1, ECM1, VEGFD	16	geneontology_Biological_Process	0.027972	Up
GO:0002381	immunoglobulin production involved in immunoglobulin mediated immune response	11/572	61/18866	1.91e-06	1.79e-05	1.3e-05	BATF, BTK, PTPRC, HLA-DRB1, XCL1, TBX21, CD28, CD40, FOXP3, HLA-DQB1, FGL2	11	geneontology_Biological_Process	0.0192308	Up
GO:0043270	positive regulation of ion transport	25/572	284/18866	2.01e-06	1.88e-05	1.36e-05	VAMP8, PTAFR, CTSS, CD4, CCL4, KCNQ1, CCL5, CCR1, CCL3, XCL1, CCR2, P2RY6, STAC3, CETP, CXCL9, CXCL10, ACSL5, CXCL11, LILRA5, CCL2, RAMP3, APOE, CXCL12, APLNR, TREM2	25	geneontology_Biological_Process	0.0437063	Up
GO:0006956	complement activation	19/572	178/18866	2.08e-06	1.94e-05	1.41e-05	C1QA, C1QC, C1QB, C3AR1, CFP, VSIG4, CR1, C3, SERPING1, FCN1, CFD, C2, C1S, C1R, IGLL5, C5AR1, CFB, CD55, CFH	19	geneontology_Biological_Process	0.0332168	Up
GO:0006801	superoxide metabolic process	12/572	74/18866	2.13e-06	1.97e-05	1.43e-05	NCF1, NCF4, CYBA, ITGB2, SYK, ITGAM, CYBB, TYROBP, CLEC7A, NRROS, NCF2, ACP5	12	geneontology_Biological_Process	0.020979	Up
GO:0007596	blood coagulation	28/572	343/18866	2.21e-06	2.04e-05	1.48e-05	PTPN6, VAV1, LCP2, WAS, PIK3R5, FERMT3, GNA15, SYK, LCK, FCER1G, DOCK8, LYN, SERPINA1, PLEK, SERPING1, CD40, F13A1, IRF1, TLR4, PLAU, PAPSS2, APOE, PROCR, IL6, TFPI, PLAUR, SERPINE1, PDPN	28	geneontology_Biological_Process	0.048951	Up
GO:0002260	lymphocyte homeostasis	11/572	62/18866	2.26e-06	2.08e-05	1.51e-05	RIPK3, CORO1A, LGALS9, TNFSF13B, CD74, IL2RA, SIT1, NCKAP1L, LYN, FOXP3, JAK3	11	geneontology_Biological_Process	0.0192308	Up
GO:0045824	negative regulation of innate immune response	11/572	62/18866	2.26e-06	2.08e-05	1.51e-05	HLA-E, LILRB1, LGALS9, HAVCR2, CD96, VSIG4, HLA-B, SLAMF8, CR1, SERPING1, HLA-F	11	geneontology_Biological_Process	0.0192308	Up
GO:0051235	maintenance of location	27/572	324/18866	2.27e-06	2.08e-05	1.51e-05	PTPN6, CORO1A, CYBA, CD4, TRPM2, LCK, PTPRC, CCR5, NRROS, FASLG, SRGN, CCL3, XCL1, LYN, CCR7, S100A9, MSR1, C3, P2RY6, CXCL9, CXCL10, CXCL11, CCL19, S100A8, APOE, IL6, APLNR	27	geneontology_Biological_Process	0.0472028	Up
GO:0050818	regulation of coagulation	13/572	88/18866	2.39e-06	2.19e-05	1.59e-05	SYK, FCER1G, LYN, PLEK, SERPING1, TLR4, PLAU, APOE, PROCR, TFPI, PLAUR, SERPINE1, PDPN	13	geneontology_Biological_Process	0.0227273	Up
GO:0002714	positive regulation of B cell mediated immunity	9/572	40/18866	2.4e-06	2.19e-05	1.59e-05	HLA-E, BTK, FCER1G, PTPRC, XCL1, TBX21, C3, CD28, CD40	9	geneontology_Biological_Process	0.0157343	Up
GO:0002891	positive regulation of immunoglobulin mediated immune response	9/572	40/18866	2.4e-06	2.19e-05	1.59e-05	HLA-E, BTK, FCER1G, PTPRC, XCL1, TBX21, C3, CD28, CD40	9	geneontology_Biological_Process	0.0157343	Up
GO:0046636	negative regulation of alpha-beta T cell activation	9/572	40/18866	2.4e-06	2.19e-05	1.59e-05	LILRB1, LGALS9, CD300A, VSIR, XCL1, TBX21, FOXP3, JAK3, ANXA1	9	geneontology_Biological_Process	0.0157343	Up
GO:0032928	regulation of superoxide anion generation	7/572	22/18866	2.6e-06	2.36e-05	1.71e-05	CYBA, ITGB2, SYK, ITGAM, TYROBP, CLEC7A, ACP5	7	geneontology_Biological_Process	0.0122378	Up
GO:0043369	CD4-positive or CD8-positive, alpha-beta T cell lineage commitment	7/572	22/18866	2.6e-06	2.36e-05	1.71e-05	BATF, IL12RB1, SLAMF6, SPN, TBX21, FOXP3, IL6	7	geneontology_Biological_Process	0.0122378	Up
GO:0043122	regulation of I-kappaB kinase, NF-kappaB signaling	23/572	252/18866	2.8e-06	2.53e-05	1.84e-05	LGALS9, CD4, CARD9, CASP1, RHOH, CARD11, CD74, HLA-DRB1, FASLG, PYCARD, CCR7, APOL3, CD40, TNFSF10, S100A4, UBD, SECTM1, TLR4, CCL19, BST2, HMOX1, S100B, ECM1	23	geneontology_Biological_Process	0.0402098	Up
GO:0006898	receptor-mediated endocytosis	27/572	328/18866	2.86e-06	2.58e-05	1.87e-05	LILRB1, ITGB2, SYK, ITGAM, FCGR1B, SIGLEC1, CD14, STAB1, FCER1G, FCGR1A, CD163, FOLR2, CXCL16, MSR1, C3, MRC1, DAB2, FCGR2B, JCHAIN, APOL1, MARCO, CCL19, DKK1, RAMP3, APOC1, APOE, SERPINE1	27	geneontology_Biological_Process	0.0472028	Up
GO:0070229	negative regulation of lymphocyte apoptotic process	8/572	31/18866	2.9e-06	2.6e-05	1.89e-05	DOCK8, CD74, CCL5, HSH2D, CD27, JAK3, IL7R, IDO1	8	geneontology_Biological_Process	0.013986	Up
GO:1902624	positive regulation of neutrophil migration	8/572	31/18866	2.9e-06	2.6e-05	1.89e-05	C3AR1, RAC2, CD74, NCKAP1L, XCL1, CCR7, CCL19, C5AR1	8	geneontology_Biological_Process	0.013986	Up
GO:0030890	positive regulation of B cell proliferation	9/572	41/18866	2.99e-06	2.68e-05	1.95e-05	SASH3, TNFSF13B, PTPRC, CARD11, CD74, CD38, NCKAP1L, CD40, TLR4	9	geneontology_Biological_Process	0.0157343	Up
GO:0050817	coagulation	28/572	349/18866	3.09e-06	2.76e-05	2e-05	PTPN6, VAV1, LCP2, WAS, PIK3R5, FERMT3, GNA15, SYK, LCK, FCER1G, DOCK8, LYN, SERPINA1, PLEK, SERPING1, CD40, F13A1, IRF1, TLR4, PLAU, PAPSS2, APOE, PROCR, IL6, TFPI, PLAUR, SERPINE1, PDPN	28	geneontology_Biological_Process	0.048951	Up
GO:0099024	plasma membrane invagination	16/572	135/18866	3.4e-06	3.03e-05	2.2e-05	BIN2, ITGB2, AIF1, ITGAM, CD300A, FCER1G, FCGR1A, RHOH, RAC2, NCKAP1L, MSR1, C3, FCGR2B, MARCO, IGLL5, TREM2	16	geneontology_Biological_Process	0.027972	Up
GO:0050871	positive regulation of B cell activation	17/572	151/18866	3.45e-06	3.07e-05	2.23e-05	SASH3, BTK, INPP5D, SYK, TNFSF13B, PTPRC, CARD11, CD74, CD38, CD27, NCKAP1L, TBX21, CD28, CD40, TLR4, IGLL5, IL6	17	geneontology_Biological_Process	0.0297203	Up
GO:0032703	negative regulation of interleukin-2 production	7/572	23/18866	3.65e-06	3.24e-05	2.35e-05	HAVCR2, PTPRC, VSIG4, XCL1, TBX21, FOXP3, IL20RB	7	geneontology_Biological_Process	0.0122378	Up
GO:0061756	leukocyte adhesion to vascular endothelial cell	10/572	53/18866	3.66e-06	3.24e-05	2.35e-05	PTAFR, SELPLG, ITGB2, ALOX5, SELL, SPN, CCR2, ICAM1, IL6, CXCL12	10	geneontology_Biological_Process	0.0174825	Up
GO:0048246	macrophage chemotaxis	9/572	42/18866	3.71e-06	3.28e-05	2.38e-05	CSF1R, C3AR1, CSF1, CCL5, CCL3, SLAMF8, CMKLR1, CCL2, C5AR1	9	geneontology_Biological_Process	0.0157343	Up
GO:0019932	second-messenger-mediated signaling	33/572	456/18866	3.94e-06	3.48e-05	2.52e-05	BTK, CD4, TRPM2, S1PR4, SYK, GPR65, LAT2, CXCR3, CCRL2, CD3E, SLA2, CCL4, TBC1D10C, PTPRC, CCR5, ZAP70, CCR1, CXCR6, FPR1, CCL3, CCR2, CCR7, PLEK, P2RY6, CXCL9, CXCL10, CXCL11, CMKLR1, RAMP3, APOE, APLNR, TREM2, DEFB1	33	geneontology_Biological_Process	0.0576923	Up
GO:0002295	T-helper cell lineage commitment	6/572	16/18866	4.68e-06	4.11e-05	2.98e-05	BATF, IL12RB1, SLAMF6, SPN, TBX21, IL6	6	geneontology_Biological_Process	0.0104895	Up
GO:0045953	negative regulation of natural killer cell mediated cytotoxicity	6/572	16/18866	4.68e-06	4.11e-05	2.98e-05	HLA-E, LILRB1, LGALS9, HAVCR2, HLA-B, HLA-F	6	geneontology_Biological_Process	0.0104895	Up
GO:0045920	negative regulation of exocytosis	8/572	33/18866	4.83e-06	4.22e-05	3.07e-05	LGALS9, CD300A, CD84, CCR2, FCGR2B, HLA-F, ANXA1, HMOX1	8	geneontology_Biological_Process	0.013986	Up
GO:0090022	regulation of neutrophil chemotaxis	8/572	33/18866	4.83e-06	4.22e-05	3.07e-05	C3AR1, RAC2, CD74, NCKAP1L, XCL1, CCR7, CCL19, C5AR1	8	geneontology_Biological_Process	0.013986	Up
GO:1903306	negative regulation of regulated secretory pathway	7/572	24/18866	5.01e-06	4.37e-05	3.17e-05	LGALS9, CD300A, CD84, CCR2, FCGR2B, HLA-F, HMOX1	7	geneontology_Biological_Process	0.0122378	Up
GO:0034154	toll-like receptor 7 signaling pathway	5/572	10/18866	5.59e-06	4.86e-05	3.52e-05	SCIMP, PIK3AP1, UNC93B1, HAVCR2, TLR7	5	geneontology_Biological_Process	0.00874126	Up
GO:2000425	regulation of apoptotic cell clearance	5/572	10/18866	5.59e-06	4.86e-05	3.52e-05	CD300LF, C3, C2, CCL2, TREM2	5	geneontology_Biological_Process	0.00874126	Up
GO:0060337	type I interferon signaling pathway	13/572	95/18866	5.72e-06	4.95e-05	3.59e-05	PTPN6, HLA-E, IRF8, IRF5, HLA-B, HLA-C, IRF1, HLA-F, IFI27, IFITM1, OAS1, BST2, OASL	13	geneontology_Biological_Process	0.0227273	Up
GO:0071357	cellular response to type I interferon	13/572	95/18866	5.72e-06	4.95e-05	3.59e-05	PTPN6, HLA-E, IRF8, IRF5, HLA-B, HLA-C, IRF1, HLA-F, IFI27, IFITM1, OAS1, BST2, OASL	13	geneontology_Biological_Process	0.0227273	Up
GO:0050730	regulation of peptidyl-tyrosine phosphorylation	23/572	263/18866	5.74e-06	4.95e-05	3.59e-05	NCF1, PTPN6, IL18, CD4, ITGB2, SYK, HCLS1, CSF1R, SAMSN1, CD3E, CD300A, PTPRC, FCGR1A, CD74, CCL5, LYN, CD40, TNFRSF18, LILRA5, OSM, ICAM1, IL6, TREM2	23	geneontology_Biological_Process	0.0402098	Up
GO:0002637	regulation of immunoglobulin production	11/572	68/18866	5.78e-06	4.97e-05	3.61e-05	SASH3, HLA-E, PTPRC, XCL1, TBX21, CD28, FCGR2B, CD40, FOXP3, MZB1, IL6	11	geneontology_Biological_Process	0.0192308	Up
GO:0032642	regulation of chemokine production	11/572	68/18866	5.78e-06	4.97e-05	3.61e-05	LGALS9, SYK, HAVCR2, CLEC7A, CD74, TLR2, TLR7, TLR4, ACKR1, IL6, TREM2	11	geneontology_Biological_Process	0.0192308	Up
GO:0030193	regulation of blood coagulation	12/572	82/18866	6.44e-06	5.52e-05	4e-05	SYK, FCER1G, LYN, PLEK, SERPING1, TLR4, PLAU, APOE, TFPI, PLAUR, SERPINE1, PDPN	12	geneontology_Biological_Process	0.020979	Up
GO:0002377	immunoglobulin production	20/572	210/18866	6.56e-06	5.61e-05	4.07e-05	SASH3, HLA-E, BATF, BTK, TNFSF13B, CD86, PTPRC, CARD11, HLA-DRB1, XCL1, TBX21, CD28, FCGR2B, CD40, FOXP3, MZB1, HLA-DQB1, IL7R, IL6, FGL2	20	geneontology_Biological_Process	0.034965	Up
GO:0002639	positive regulation of immunoglobulin production	9/572	45/18866	6.8e-06	5.79e-05	4.2e-05	SASH3, HLA-E, PTPRC, XCL1, TBX21, CD28, CD40, MZB1, IL6	9	geneontology_Biological_Process	0.0157343	Up
GO:0032722	positive regulation of chemokine production	9/572	45/18866	6.8e-06	5.79e-05	4.2e-05	LGALS9, SYK, HAVCR2, CLEC7A, CD74, TLR2, TLR7, TLR4, IL6	9	geneontology_Biological_Process	0.0157343	Up
GO:0010819	regulation of T cell chemotaxis	6/572	17/18866	7.04e-06	5.98e-05	4.34e-05	CCL5, XCL2, XCL1, CCR2, CXCL10, CXCL13	6	geneontology_Biological_Process	0.0104895	Up
GO:0010324	membrane invagination	16/572	143/18866	7.21e-06	6.11e-05	4.44e-05	BIN2, ITGB2, AIF1, ITGAM, CD300A, FCER1G, FCGR1A, RHOH, RAC2, NCKAP1L, MSR1, C3, FCGR2B, MARCO, IGLL5, TREM2	16	geneontology_Biological_Process	0.027972	Up
GO:1900046	regulation of hemostasis	12/572	83/18866	7.32e-06	6.19e-05	4.49e-05	SYK, FCER1G, LYN, PLEK, SERPING1, TLR4, PLAU, APOE, TFPI, PLAUR, SERPINE1, PDPN	12	geneontology_Biological_Process	0.020979	Up
GO:0051701	interaction with host	20/572	212/18866	7.56e-06	6.38e-05	4.63e-05	VAMP8, SELPLG, LGALS9, CD4, SIGLEC1, CD86, CCR5, SLAMF1, CD74, HLA-DRB1, CR1, MRC1, CD209, FCN1, IFITM1, ANPEP, CLEC4G, ICAM1, CD55, PTX3	20	geneontology_Biological_Process	0.034965	Up
GO:0006691	leukotriene metabolic process	8/572	35/18866	7.76e-06	6.54e-05	4.75e-05	DPEP2, SYK, ALOX5, GGTA1, TLR2, ALOX5AP, GGT5, PLA2G5	8	geneontology_Biological_Process	0.013986	Up
GO:0050731	positive regulation of peptidyl-tyrosine phosphorylation	19/572	195/18866	8e-06	6.72e-05	4.88e-05	NCF1, IL18, CD4, SYK, HCLS1, CSF1R, CD3E, PTPRC, FCGR1A, CD74, CCL5, LYN, CD40, TNFRSF18, LILRA5, OSM, ICAM1, IL6, TREM2	19	geneontology_Biological_Process	0.0332168	Up
GO:0002832	negative regulation of response to biotic stimulus	13/572	98/18866	8.11e-06	6.79e-05	4.92e-05	HLA-E, LILRB1, LGALS9, HAVCR2, CD96, IL2RA, VSIG4, HLA-B, SLAMF8, CR1, SERPING1, HLA-F, FGL2	13	geneontology_Biological_Process	0.0227273	Up
GO:0030316	osteoclast differentiation	13/572	98/18866	8.11e-06	6.79e-05	4.92e-05	LILRB4, INPP5D, LILRB1, CSF1R, TYROBP, LILRB3, FCER1G, CSF1, CCR1, CCL3, TLR4, OSCAR, TREM2	13	geneontology_Biological_Process	0.0227273	Up
GO:0045581	negative regulation of T cell differentiation	9/572	46/18866	8.23e-06	6.87e-05	4.98e-05	CD74, TBX21, FOXP3, CTLA4, JAK3, IRF1, ANXA1, FGL2, LAG3	9	geneontology_Biological_Process	0.0157343	Up
GO:0002431	Fc receptor mediated stimulatory signaling pathway	16/572	145/18866	8.63e-06	7.19e-05	5.22e-05	VAV1, WAS, HCK, SYK, CD247, FCER1G, FGR, MYO1G, PTPRC, FCGR1A, CD3G, NCKAP1L, LYN, FCGR3A, FCGR2A, FCGR2B	16	geneontology_Biological_Process	0.027972	Up
GO:1903305	regulation of regulated secretory pathway	17/572	162/18866	8.95e-06	7.44e-05	5.4e-05	VAMP8, PTAFR, LGALS9, ITGB2, SYK, ITGAM, CD300A, FCER1G, FGR, CD84, RAC2, CCR2, LYN, FCGR2B, STXBP2, HLA-F, HMOX1	17	geneontology_Biological_Process	0.0297203	Up
GO:0042832	defense response to protozoan	7/572	26/18866	9.04e-06	7.5e-05	5.44e-05	BATF, IRF8, CLEC7A, CCDC88B, CD40, BATF2, GBP4	7	geneontology_Biological_Process	0.0122378	Up
GO:0034340	response to type I interferon	13/572	99/18866	9.08e-06	7.52e-05	5.46e-05	PTPN6, HLA-E, IRF8, IRF5, HLA-B, HLA-C, IRF1, HLA-F, IFI27, IFITM1, OAS1, BST2, OASL	13	geneontology_Biological_Process	0.0227273	Up
GO:0009595	detection of biotic stimulus	8/572	36/18866	9.72e-06	8.03e-05	5.83e-05	NLRP3, CLEC7A, TLR2, HLA-DRB1, HLA-B, CRTAM, TLR4, TREM2	8	geneontology_Biological_Process	0.013986	Up
GO:0033632	regulation of cell-cell adhesion mediated by integrin	5/572	11/18866	1e-05	8.24e-05	5.98e-05	FERMT3, SKAP1, CD3E, CCL5, CXCL13	5	geneontology_Biological_Process	0.00874126	Up
GO:0050792	regulation of viral process	20/572	217/18866	1.07e-05	8.81e-05	6.4e-05	LGALS9, CD4, CSF1R, CCL4, CD74, CCL5, APOBEC3H, HLA-DRB1, CCL3, CCL8, CD28, FCN1, IFI27, IFITM1, OAS1, APOE, BST2, OASL, PTX3, SLPI	20	geneontology_Biological_Process	0.034965	Up
GO:0030198	extracellular matrix organization	29/572	395/18866	1.15e-05	9.48e-05	6.88e-05	CTSS, ITGB2, ITGAM, ITGAL, TNFRSF1B, ICAM3, LCP1, HAS1, ITGAX, CST3, FBLN2, MMP19, ICAM1, IL6, SPOCK2, DCN, TNXB, ADAMTS2, LUM, NTN4, PTX3, ADAMTS5, CTSG, TPSAB1, SERPINE1, MMP2, DPT, PDPN, MMP9	29	geneontology_Biological_Process	0.0506993	Up
GO:0010517	regulation of phospholipase activity	11/572	73/18866	1.17e-05	9.59e-05	6.96e-05	PLCB2, PTAFR, RASGRP4, GNA15, S1PR4, CD86, CCL5, P2RY6, C5AR1, ANXA1, PLA2G5	11	geneontology_Biological_Process	0.0192308	Up
GO:0001562	response to protozoan	7/572	27/18866	1.19e-05	9.7e-05	7.04e-05	BATF, IRF8, CLEC7A, CCDC88B, CD40, BATF2, GBP4	7	geneontology_Biological_Process	0.0122378	Up
GO:0072539	T-helper 17 cell differentiation	7/572	27/18866	1.19e-05	9.7e-05	7.04e-05	BATF, IL12RB1, NLRP3, SLAMF6, TBX21, FOXP3, IL6	7	geneontology_Biological_Process	0.0122378	Up
GO:0097242	amyloid-beta clearance	8/572	37/18866	1.21e-05	9.83e-05	7.13e-05	ITGB2, ITGAM, MSR1, C3, MARCO, C5AR1, APOE, TREM2	8	geneontology_Biological_Process	0.013986	Up
GO:0043062	extracellular structure organization	29/572	396/18866	1.21e-05	9.84e-05	7.14e-05	CTSS, ITGB2, ITGAM, ITGAL, TNFRSF1B, ICAM3, LCP1, HAS1, ITGAX, CST3, FBLN2, MMP19, ICAM1, IL6, SPOCK2, DCN, TNXB, ADAMTS2, LUM, NTN4, PTX3, ADAMTS5, CTSG, TPSAB1, SERPINE1, MMP2, DPT, PDPN, MMP9	29	geneontology_Biological_Process	0.0506993	Up
GO:0002758	innate immune response-activating signal transduction	14/572	117/18866	1.24e-05	0.0001	7.26e-05	HCK, PSMB10, SYK, CARD9, FCER1G, ICAM3, CLEC4A, CARD11, CLEC10A, LYN, CD209, FCN1, CLEC4E, PSMB9	14	geneontology_Biological_Process	0.0244755	Up
GO:0010952	positive regulation of peptidase activity	19/572	201/18866	1.24e-05	0.0001	7.26e-05	LGALS9, SYK, CARD9, LCK, NLRP3, CASP1, VSIR, CLEC7A, FASLG, PYCARD, LYN, CR1, LGMN, S100A9, TNFSF10, S100A8, AIM2, PCOLCE, RCN3	19	geneontology_Biological_Process	0.0332168	Up
GO:1903531	negative regulation of secretion by cell	17/572	166/18866	1.24e-05	0.0001	7.26e-05	VAMP8, LILRB1, LGALS9, TNFRSF1B, CD300A, CD84, RHBDF2, SRGN, CCR2, FCGR2B, FOXP3, HLA-F, OSM, APOE, ANXA1, HMOX1, LRRC32	17	geneontology_Biological_Process	0.0297203	Up
GO:0010759	positive regulation of macrophage chemotaxis	6/572	19/18866	1.47e-05	0.000118	8.54e-05	CSF1R, C3AR1, CSF1, CCL5, CMKLR1, C5AR1	6	geneontology_Biological_Process	0.0104895	Up
GO:0032930	positive regulation of superoxide anion generation	6/572	19/18866	1.47e-05	0.000118	8.54e-05	CYBA, ITGB2, SYK, ITGAM, TYROBP, CLEC7A	6	geneontology_Biological_Process	0.0104895	Up
GO:0070233	negative regulation of T cell apoptotic process	6/572	19/18866	1.47e-05	0.000118	8.54e-05	DOCK8, CCL5, CD27, JAK3, IL7R, IDO1	6	geneontology_Biological_Process	0.0104895	Up
GO:0043029	T cell homeostasis	8/572	38/18866	1.49e-05	0.000119	8.65e-05	RIPK3, CORO1A, LGALS9, IL2RA, SIT1, NCKAP1L, FOXP3, JAK3	8	geneontology_Biological_Process	0.013986	Up
GO:0061844	antimicrobial humoral immune response mediated by antimicrobial peptide	11/572	75/18866	1.53e-05	0.000122	8.85e-05	RNASE6, S100A9, CXCL9, CXCL10, CXCL11, CCL13, CXCL13, GNLY, CXCL1, DEFB1, CXCL14	11	geneontology_Biological_Process	0.0192308	Up
GO:0001916	positive regulation of T cell mediated cytotoxicity	7/572	28/18866	1.54e-05	0.000123	8.92e-05	HLA-E, IL12RB1, PTPRC, HLA-B, XCL1, HLA-F, CD1C	7	geneontology_Biological_Process	0.0122378	Up
GO:0002360	T cell lineage commitment	7/572	28/18866	1.54e-05	0.000123	8.92e-05	BATF, IL12RB1, SLAMF6, SPN, TBX21, FOXP3, IL6	7	geneontology_Biological_Process	0.0122378	Up
GO:0010518	positive regulation of phospholipase activity	10/572	62/18866	1.58e-05	0.000125	9.1e-05	PLCB2, PTAFR, RASGRP4, GNA15, S1PR4, CD86, CCL5, P2RY6, C5AR1, PLA2G5	10	geneontology_Biological_Process	0.0174825	Up
GO:0001768	establishment of T cell polarity	5/572	12/18866	1.67e-05	0.000132	9.57e-05	DOCK2, DOCK8, CCR7, CRTAM, CCL19	5	geneontology_Biological_Process	0.00874126	Up
GO:0038110	interleukin-2-mediated signaling pathway	5/572	12/18866	1.67e-05	0.000132	9.57e-05	SYK, IL2RG, IL2RA, IL2RB, JAK3	5	geneontology_Biological_Process	0.00874126	Up
GO:0072540	T-helper 17 cell lineage commitment	5/572	12/18866	1.67e-05	0.000132	9.57e-05	BATF, IL12RB1, SLAMF6, TBX21, IL6	5	geneontology_Biological_Process	0.00874126	Up
GO:0032660	regulation of interleukin-17 production	8/572	39/18866	1.82e-05	0.000144	0.000104	IL18, SLAMF6, VSIR, NCKAP1L, FOXP3, TLR4, OSM, IL6	8	geneontology_Biological_Process	0.013986	Up
GO:0050690	regulation of defense response to virus by virus	7/572	29/18866	1.98e-05	0.000156	0.000113	HCK, CD4, DOCK2, LCK, CD247, CD8B, CD28	7	geneontology_Biological_Process	0.0122378	Up
GO:2000108	positive regulation of leukocyte apoptotic process	7/572	29/18866	1.98e-05	0.000156	0.000113	LGALS9, CCL5, LYN, PIK3CD, PDCD1, IDO1, ANXA1	7	geneontology_Biological_Process	0.0122378	Up
GO:0002455	humoral immune response mediated by circulating immunoglobulin	16/572	155/18866	2.01e-05	0.000157	0.000114	PTPN6, C1QA, C1QC, C1QB, PTPRC, HLA-DRB1, CR1, C3, SERPING1, FCGR2B, C2, HLA-DQB1, C1S, C1R, IGLL5, CD55	16	geneontology_Biological_Process	0.027972	Up
GO:0051048	negative regulation of secretion	18/572	190/18866	2.02e-05	0.000158	0.000115	VAMP8, LILRB1, LGALS9, TNFRSF1B, CD300A, CD84, CD74, RHBDF2, SRGN, CCR2, FCGR2B, FOXP3, HLA-F, OSM, APOE, ANXA1, HMOX1, LRRC32	18	geneontology_Biological_Process	0.0314685	Up
GO:0002827	positive regulation of T-helper 1 type immune response	6/572	20/18866	2.04e-05	0.000159	0.000116	IL18, IL12RB1, XCL1, CCR2, CCL19, ANXA1	6	geneontology_Biological_Process	0.0104895	Up
GO:0002433	immune response-regulating cell surface receptor signaling pathway involved in phagocytosis	15/572	139/18866	2.14e-05	0.000166	0.000121	VAV1, WAS, HCK, SYK, CD247, FGR, MYO1G, PTPRC, FCGR1A, CD3G, NCKAP1L, LYN, FCGR3A, FCGR2A, FCGR2B	15	geneontology_Biological_Process	0.0262238	Up
GO:0038096	Fc-gamma receptor signaling pathway involved in phagocytosis	15/572	139/18866	2.14e-05	0.000166	0.000121	VAV1, WAS, HCK, SYK, CD247, FGR, MYO1G, PTPRC, FCGR1A, CD3G, NCKAP1L, LYN, FCGR3A, FCGR2A, FCGR2B	15	geneontology_Biological_Process	0.0262238	Up
GO:0097696	receptor signaling pathway via STAT	17/572	174/18866	2.3e-05	0.000178	0.000129	IL18, IL10RA, STAT4, HCLS1, CSF1R, CD300A, PTPRC, CCL5, CCR2, LYN, CD40, JAK3, TNFRSF18, IL7R, CCL2, OSM, IL6	17	geneontology_Biological_Process	0.0297203	Up
GO:0007229	integrin-mediated signaling pathway	13/572	108/18866	2.36e-05	0.000182	0.000132	VAV1, FERMT3, HCK, FYB1, ITGB2, SYK, ITGAM, ITGAL, TYROBP, FCER1G, FGR, PLEK, ITGAX	13	geneontology_Biological_Process	0.0227273	Up
GO:1903900	regulation of viral life cycle	16/572	157/18866	2.36e-05	0.000182	0.000132	LGALS9, CD4, CD74, CCL5, APOBEC3H, HLA-DRB1, CCL8, CD28, FCN1, IFI27, IFITM1, OAS1, BST2, OASL, PTX3, SLPI	16	geneontology_Biological_Process	0.027972	Up
GO:1904894	positive regulation of receptor signaling pathway via STAT	12/572	93/18866	2.39e-05	0.000184	0.000134	IL18, IL10RA, HCLS1, CSF1R, CD300A, CCL5, LYN, CD40, TNFRSF18, IL7R, OSM, IL6	12	geneontology_Biological_Process	0.020979	Up
GO:0010758	regulation of macrophage chemotaxis	7/572	30/18866	2.52e-05	0.000194	0.000141	CSF1R, C3AR1, CSF1, CCL5, SLAMF8, CMKLR1, C5AR1	7	geneontology_Biological_Process	0.0122378	Up
GO:0030168	platelet activation	16/572	158/18866	2.55e-05	0.000196	0.000142	PTPN6, VAV1, LCP2, PIK3R5, FERMT3, GNA15, SYK, LCK, FCER1G, LYN, PLEK, CD40, TLR4, APOE, IL6, PDPN	16	geneontology_Biological_Process	0.027972	Up
GO:0001767	establishment of lymphocyte polarity	5/572	13/18866	2.65e-05	0.000201	0.000146	DOCK2, DOCK8, CCR7, CRTAM, CCL19	5	geneontology_Biological_Process	0.00874126	Up
GO:0035723	interleukin-15-mediated signaling pathway	5/572	13/18866	2.65e-05	0.000201	0.000146	CD4, IL2RG, IL2RB, JAK3, IL15RA	5	geneontology_Biological_Process	0.00874126	Up
GO:0045579	positive regulation of B cell differentiation	5/572	13/18866	2.65e-05	0.000201	0.000146	BTK, INPP5D, SYK, CD27, NCKAP1L	5	geneontology_Biological_Process	0.00874126	Up
GO:0048302	regulation of isotype switching to IgG isotypes	5/572	13/18866	2.65e-05	0.000201	0.000146	PTPRC, TBX21, CD28, CD40, FOXP3	5	geneontology_Biological_Process	0.00874126	Up
GO:0071350	cellular response to interleukin-15	5/572	13/18866	2.65e-05	0.000201	0.000146	CD4, IL2RG, IL2RB, JAK3, IL15RA	5	geneontology_Biological_Process	0.00874126	Up
GO:0071352	cellular response to interleukin-2	5/572	13/18866	2.65e-05	0.000201	0.000146	SYK, IL2RG, IL2RA, IL2RB, JAK3	5	geneontology_Biological_Process	0.00874126	Up
GO:0072683	T cell extravasation	5/572	13/18866	2.65e-05	0.000201	0.000146	RIPK3, ITGAL, CCR2, CCL2, ICAM1	5	geneontology_Biological_Process	0.00874126	Up
GO:0043903	regulation of symbiotic process	20/572	231/18866	2.67e-05	0.000202	0.000147	LGALS9, CD4, CSF1R, CCL4, CD74, CCL5, APOBEC3H, HLA-DRB1, CCL3, CCL8, CD28, FCN1, IFI27, IFITM1, OAS1, APOE, BST2, OASL, PTX3, SLPI	20	geneontology_Biological_Process	0.034965	Up
GO:0019370	leukotriene biosynthetic process	6/572	21/18866	2.78e-05	0.00021	0.000152	SYK, ALOX5, GGTA1, ALOX5AP, GGT5, PLA2G5	6	geneontology_Biological_Process	0.0104895	Up
GO:1903978	regulation of microglial cell activation	6/572	21/18866	2.78e-05	0.00021	0.000152	PTPRC, CTSC, CST7, CCL3, IL6, TREM2	6	geneontology_Biological_Process	0.0104895	Up
GO:0002312	B cell activation involved in immune response	11/572	80/18866	2.85e-05	0.000214	0.000155	BATF, MFNG, CD180, PTPRC, TBX21, CD28, FCGR2B, CD40, FOXP3, TLR4, IL6	11	geneontology_Biological_Process	0.0192308	Up
GO:1901224	positive regulation of NIK, NF-kappaB signaling	11/572	80/18866	2.85e-05	0.000214	0.000155	IL18, LGALS9, CD86, CD14, HAVCR2, TLR2, CD27, TLR7, TLR4, CCL19, TREM2	11	geneontology_Biological_Process	0.0192308	Up
GO:0048017	inositol lipid-mediated signaling	18/572	196/18866	3.07e-05	0.00023	0.000167	NCF1, PTPN6, PLCB2, PTAFR, IL18, PIK3R5, ADAP2, PIK3AP1, HCLS1, CSF1R, HCST, FGR, CCL5, LYN, PIK3CD, CD28, OSM, DCN	18	geneontology_Biological_Process	0.0314685	Up
GO:0014066	regulation of phosphatidylinositol 3-kinase signaling	14/572	127/18866	3.16e-05	0.000235	0.000171	NCF1, PTPN6, IL18, PIK3R5, PIK3AP1, HCLS1, HCST, FGR, CCL5, LYN, PIK3CD, CD28, OSM, DCN	14	geneontology_Biological_Process	0.0244755	Up
GO:0002675	positive regulation of acute inflammatory response	7/572	31/18866	3.17e-05	0.000235	0.000171	HLA-E, BTK, FCER1G, CCR7, C3, OSM, IL6	7	geneontology_Biological_Process	0.0122378	Up
GO:0050858	negative regulation of antigen receptor-mediated signaling pathway	7/572	31/18866	3.17e-05	0.000235	0.000171	PTPN6, LILRB4, SLA2, CD300A, SH2D1A, UBASH3A, FCGR2B	7	geneontology_Biological_Process	0.0122378	Up
GO:0072538	T-helper 17 type immune response	7/572	31/18866	3.17e-05	0.000235	0.000171	BATF, IL12RB1, NLRP3, SLAMF6, TBX21, FOXP3, IL6	7	geneontology_Biological_Process	0.0122378	Up
GO:2000515	negative regulation of CD4-positive, alpha-beta T cell activation	7/572	31/18866	3.17e-05	0.000235	0.000171	LGALS9, VSIR, XCL1, TBX21, FOXP3, JAK3, ANXA1	7	geneontology_Biological_Process	0.0122378	Up
GO:0045670	regulation of osteoclast differentiation	10/572	67/18866	3.18e-05	0.000235	0.000171	LILRB4, INPP5D, LILRB1, TYROBP, LILRB3, CSF1, CCR1, CCL3, TLR4, TREM2	10	geneontology_Biological_Process	0.0174825	Up
GO:0010959	regulation of metal ion transport	28/572	396/18866	3.21e-05	0.000238	0.000172	PTPN6, CORO1A, CD33, LILRB1, CYBA, CD4, LILRB2, IL16, CCL4, KCNQ1, CD84, CCL5, CCR1, CCL3, XCL1, LYN, P2RY6, STAC3, CXCL9, CXCL10, CXCL11, LILRA5, CCL2, RAMP3, ICAM1, CXCL12, APLNR, TREM2	28	geneontology_Biological_Process	0.048951	Up
GO:0022617	extracellular matrix disassembly	11/572	82/18866	3.6e-05	0.000266	0.000193	CTSS, LCP1, CST3, MMP19, IL6, ADAMTS5, CTSG, TPSAB1, MMP2, PDPN, MMP9	11	geneontology_Biological_Process	0.0192308	Up
GO:0045620	negative regulation of lymphocyte differentiation	9/572	55/18866	3.72e-05	0.000274	0.000198	CD74, TBX21, FOXP3, CTLA4, JAK3, IRF1, ANXA1, FGL2, LAG3	9	geneontology_Biological_Process	0.0157343	Up
GO:0006925	inflammatory cell apoptotic process	6/572	22/18866	3.73e-05	0.000274	0.000198	CCR5, CCL5, FASLG, PIK3CD, ANXA1, IL6	6	geneontology_Biological_Process	0.0104895	Up
GO:0045624	positive regulation of T-helper cell differentiation	6/572	22/18866	3.73e-05	0.000274	0.000198	IL18, IL12RB1, NLRP3, CD86, CCL19, ANXA1	6	geneontology_Biological_Process	0.0104895	Up
GO:0010950	positive regulation of endopeptidase activity	17/572	181/18866	3.81e-05	0.000279	0.000203	LGALS9, SYK, CARD9, LCK, NLRP3, CASP1, VSIR, CLEC7A, FASLG, PYCARD, LYN, CR1, LGMN, S100A9, TNFSF10, S100A8, AIM2	17	geneontology_Biological_Process	0.0297203	Up
GO:0035821	modulation of process of other organism	13/572	113/18866	3.83e-05	0.00028	0.000203	CD4, MPEG1, CSF1R, CCL4, CCL5, CCL3, CCL8, S100A9, CD209, IFI27, APOE, PTX3, SLPI	13	geneontology_Biological_Process	0.0227273	Up
GO:0050850	positive regulation of calcium-mediated signaling	8/572	43/18866	3.86e-05	0.000282	0.000205	CD4, SYK, CD3E, CCL4, ZAP70, CCL3, P2RY6, TREM2	8	geneontology_Biological_Process	0.013986	Up
GO:0031334	positive regulation of protein-containing complex assembly	21/572	257/18866	4e-05	0.00029	0.00021	WAS, GMFG, HCK, CORO1A, SYK, SKAP1, CLEC7A, NCKAP1L, PYCARD, LCP1, CCR7, PLEK, GBP5, CXCL13, WARS1, TLR4, CDC42EP2, ICAM1, TPPP3, CCL26, WNT10B	21	geneontology_Biological_Process	0.0367133	Up
GO:0045591	positive regulation of regulatory T cell differentiation	5/572	14/18866	4.02e-05	0.00029	0.00021	LILRB4, LGALS9, LILRB2, VSIR, FOXP3	5	geneontology_Biological_Process	0.00874126	Up
GO:0046007	negative regulation of activated T cell proliferation	5/572	14/18866	4.02e-05	0.00029	0.00021	LGALS9, CRTAM, FOXP3, PDCD1LG2, LRRC32	5	geneontology_Biological_Process	0.00874126	Up
GO:0048291	isotype switching to IgG isotypes	5/572	14/18866	4.02e-05	0.00029	0.00021	PTPRC, TBX21, CD28, CD40, FOXP3	5	geneontology_Biological_Process	0.00874126	Up
GO:0070669	response to interleukin-2	5/572	14/18866	4.02e-05	0.00029	0.00021	SYK, IL2RG, IL2RA, IL2RB, JAK3	5	geneontology_Biological_Process	0.00874126	Up
GO:0070672	response to interleukin-15	5/572	14/18866	4.02e-05	0.00029	0.00021	CD4, IL2RG, IL2RB, JAK3, IL15RA	5	geneontology_Biological_Process	0.00874126	Up
GO:0007259	receptor signaling pathway via JAK-STAT	16/572	164/18866	4.04e-05	0.000291	0.000211	IL18, IL10RA, STAT4, HCLS1, CSF1R, CD300A, PTPRC, CCL5, CCR2, LYN, CD40, JAK3, TNFRSF18, CCL2, OSM, IL6	16	geneontology_Biological_Process	0.027972	Up
GO:0002791	regulation of peptide secretion	27/572	381/18866	4.26e-05	0.000306	0.000222	HLA-E, CD33, SYK, TLR8, ALOX5, CD14, FGR, CD74, TLR2, CCL5, CD38, RHBDF2, HLA-DRB1, SRGN, LYN, CRTAM, FCGR2B, CD40, FOXP3, CLEC4E, TLR4, S100A8, APOE, ANXA1, IL6, LRRC32, TREM2	27	geneontology_Biological_Process	0.0472028	Up
GO:1904645	response to amyloid-beta	9/572	56/18866	4.32e-05	0.00031	0.000225	CASP4, LGMN, FCGR2B, TLR4, RAMP3, ICAM1, TREM2, MMP2, MMP9	9	geneontology_Biological_Process	0.0157343	Up
GO:0032620	interleukin-17 production	8/572	44/18866	4.6e-05	0.000329	0.000239	IL18, SLAMF6, VSIR, NCKAP1L, FOXP3, TLR4, OSM, IL6	8	geneontology_Biological_Process	0.013986	Up
GO:0071692	protein localization to extracellular region	31/572	470/18866	4.66e-05	0.000333	0.000242	LCP2, HLA-E, CD33, SYK, TLR8, TNFSF13B, ALOX5, NLRP3, CD14, FGR, TLR2, CCL5, CD38, RHBDF2, NRROS, HLA-DRB1, SRGN, LYN, PLEK, CRTAM, FCGR2B, CD40, FOXP3, CLEC4E, TLR4, APOE, ANXA1, IL6, LRRC32, TREM2, RCN3	31	geneontology_Biological_Process	0.0541958	Up
GO:0002534	cytokine production involved in inflammatory response	10/572	70/18866	4.69e-05	0.000334	0.000243	GPSM3, ALOX5, CD96, CLEC7A, PYCARD, CD6, GBP5, TLR4, IDO1, IL6	10	geneontology_Biological_Process	0.0174825	Up
GO:0035590	purinergic nucleotide receptor signaling pathway	7/572	33/18866	4.88e-05	0.000348	0.000252	PTAFR, P2RY13, P2RY8, GPR34, P2RY6, P2RY10, GPR171	7	geneontology_Biological_Process	0.0122378	Up
GO:0035743	CD4-positive, alpha-beta T cell cytokine production	6/572	23/18866	4.92e-05	0.000348	0.000253	IL18, NLRP3, XCL1, TBX21, IL6, CD55	6	geneontology_Biological_Process	0.0104895	Up
GO:1900017	positive regulation of cytokine production involved in inflammatory response	6/572	23/18866	4.92e-05	0.000348	0.000253	GPSM3, CLEC7A, CD6, GBP5, TLR4, IL6	6	geneontology_Biological_Process	0.0104895	Up
GO:1904996	positive regulation of leukocyte adhesion to vascular endothelial cell	6/572	23/18866	4.92e-05	0.000348	0.000253	PTAFR, ITGB2, ALOX5, CCR2, ICAM1, IL6	6	geneontology_Biological_Process	0.0104895	Up
GO:0050848	regulation of calcium-mediated signaling	12/572	100/18866	4.98e-05	0.000352	0.000255	CD4, SYK, CD3E, SLA2, CCL4, TBC1D10C, ZAP70, CCL3, PLEK, P2RY6, CMKLR1, TREM2	12	geneontology_Biological_Process	0.020979	Up
GO:0002220	innate immune response activating cell surface receptor signaling pathway	13/572	116/18866	5.05e-05	0.000357	0.000259	PSMB10, SYK, CARD9, FCER1G, ICAM3, CLEC4A, CARD11, CLEC10A, LYN, CD209, FCN1, CLEC4E, PSMB9	13	geneontology_Biological_Process	0.0227273	Up
GO:0010522	regulation of calcium ion transport into cytosol	12/572	101/18866	5.5e-05	0.000386	0.00028	PTPN6, CORO1A, CYBA, CD4, XCL1, LYN, P2RY6, CXCL9, CXCL10, CXCL11, RAMP3, APLNR	12	geneontology_Biological_Process	0.020979	Up
GO:0060191	regulation of lipase activity	12/572	101/18866	5.5e-05	0.000386	0.00028	PLCB2, PTAFR, RASGRP4, GNA15, S1PR4, CD86, CCL5, P2RY6, C5AR1, APOC1, ANXA1, PLA2G5	12	geneontology_Biological_Process	0.020979	Up
GO:0045637	regulation of myeloid cell differentiation	21/572	263/18866	5.59e-05	0.000392	0.000285	LILRB4, CSF3R, INPP5D, LILRB1, CD4, SPI1, HCLS1, EVI2B, TYROBP, C1QC, LILRB3, CSF1, CD74, CCR1, HLA-DRB1, NCKAP1L, CCL3, LYN, GPR171, TLR4, TREM2	21	geneontology_Biological_Process	0.0367133	Up
GO:0061041	regulation of wound healing	15/572	151/18866	5.67e-05	0.000397	0.000288	SYK, ALOX5, FCER1G, CLEC7A, LYN, PLEK, SERPING1, TLR4, PLAU, APOE, ANXA1, TFPI, PLAUR, SERPINE1, PDPN	15	geneontology_Biological_Process	0.0262238	Up
GO:0002763	positive regulation of myeloid leukocyte differentiation	9/572	58/18866	5.75e-05	0.000402	0.000292	CD4, HCLS1, EVI2B, TYROBP, CSF1, CD74, CCR1, HLA-DRB1, TREM2	9	geneontology_Biological_Process	0.0157343	Up
GO:0045064	T-helper 2 cell differentiation	5/572	15/18866	5.87e-05	0.00041	0.000298	IL18, BATF, NLRP3, CD86, ANXA1	5	geneontology_Biological_Process	0.00874126	Up
GO:0007202	activation of phospholipase C activity	7/572	34/18866	5.99e-05	0.000417	0.000302	PLCB2, RASGRP4, GNA15, S1PR4, CD86, P2RY6, C5AR1	7	geneontology_Biological_Process	0.0122378	Up
GO:0032814	regulation of natural killer cell activation	7/572	34/18866	5.99e-05	0.000417	0.000302	IL18, HLA-E, TYROBP, HAVCR2, FGR, ZNF683, HLA-F	7	geneontology_Biological_Process	0.0122378	Up
GO:0051090	regulation of DNA-binding transcription factor activity	30/572	455/18866	6.2e-05	0.000431	0.000313	RIPK3, IL18, HCK, BTK, LGALS9, ITGB2, SYK, HCLS1, NLRP3, HAVCR2, NFAM1, CARD11, TLR2, PYCARD, XCL1, LPAR5, S100A9, CD40, FOXP3, EOMES, CMKLR1, TLR4, S100A8, TMIGD3, ICAM1, IL6, AIM2, HMOX1, WNT2, WNT10B	30	geneontology_Biological_Process	0.0524476	Up
GO:0019883	antigen processing and presentation of endogenous antigen	6/572	24/18866	6.39e-05	0.000441	0.00032	HLA-E, CD74, HLA-B, HLA-C, HLA-F, CD1C	6	geneontology_Biological_Process	0.0104895	Up
GO:0033622	integrin activation	6/572	24/18866	6.39e-05	0.000441	0.00032	FERMT3, SKAP1, PLEK, MZB1, CXCL13, CXCL12	6	geneontology_Biological_Process	0.0104895	Up
GO:0098581	detection of external biotic stimulus	6/572	24/18866	6.39e-05	0.000441	0.00032	CLEC7A, TLR2, HLA-DRB1, HLA-B, TLR4, TREM2	6	geneontology_Biological_Process	0.0104895	Up
GO:0010863	positive regulation of phospholipase C activity	8/572	46/18866	6.42e-05	0.000443	0.000321	PLCB2, PTAFR, RASGRP4, GNA15, S1PR4, CD86, P2RY6, C5AR1	8	geneontology_Biological_Process	0.013986	Up
GO:1901570	fatty acid derivative biosynthetic process	12/572	103/18866	6.67e-05	0.000459	0.000333	SYK, TBXAS1, ALOX5, GGTA1, CD74, ALOX5AP, ACSL5, GGT5, HPGDS, PTGES, ANXA1, PLA2G5	12	geneontology_Biological_Process	0.020979	Up
GO:0045862	positive regulation of proteolysis	26/572	370/18866	6.77e-05	0.000465	0.000338	LGALS9, SYK, CARD9, LCK, NLRP3, TNFRSF1B, CTSC, CASP1, VSIR, CLEC7A, PYHIN1, FASLG, PYCARD, LYN, CR1, LGMN, S100A9, DAB2, TNFSF10, CLEC3B, S100A8, APOE, AIM2, PCOLCE, TREM2, RCN3	26	geneontology_Biological_Process	0.0454545	Up
GO:0048525	negative regulation of viral process	12/572	104/18866	7.34e-05	0.000503	0.000365	CCL4, CCL5, APOBEC3H, CCL3, CCL8, FCN1, IFITM1, OAS1, BST2, OASL, PTX3, SLPI	12	geneontology_Biological_Process	0.020979	Up
GO:0033209	tumor necrosis factor-mediated signaling pathway	16/572	173/18866	7.7e-05	0.000527	0.000382	PSMB10, LTB, SYK, TNFSF13B, TNFSF8, TNFRSF1B, CASP4, CASP1, CD27, PYCARD, CD40, TNFRSF18, PSMB9, AIM2, TNFSF9, CD70	16	geneontology_Biological_Process	0.027972	Up
GO:0050708	regulation of protein secretion	25/572	352/18866	7.85e-05	0.000536	0.000389	HLA-E, CD33, SYK, TLR8, ALOX5, CD14, FGR, TLR2, CCL5, CD38, RHBDF2, HLA-DRB1, SRGN, LYN, CRTAM, FCGR2B, CD40, FOXP3, CLEC4E, TLR4, APOE, ANXA1, IL6, LRRC32, TREM2	25	geneontology_Biological_Process	0.0437063	Up
GO:0048015	phosphatidylinositol-mediated signaling	17/572	192/18866	8.01e-05	0.000546	0.000396	NCF1, PTPN6, PLCB2, PTAFR, IL18, PIK3R5, PIK3AP1, HCLS1, CSF1R, HCST, FGR, CCL5, LYN, PIK3CD, CD28, OSM, DCN	17	geneontology_Biological_Process	0.0297203	Up
GO:0051091	positive regulation of DNA-binding transcription factor activity	21/572	270/18866	8.15e-05	0.000555	0.000403	RIPK3, IL18, BTK, LGALS9, ITGB2, HCLS1, NLRP3, NFAM1, CARD11, TLR2, PYCARD, LPAR5, S100A9, CD40, TLR4, S100A8, ICAM1, IL6, AIM2, WNT2, WNT10B	21	geneontology_Biological_Process	0.0367133	Up
GO:0009306	protein secretion	30/572	462/18866	8.17e-05	0.000555	0.000403	LCP2, HLA-E, CD33, SYK, TLR8, TNFSF13B, ALOX5, NLRP3, CD14, FGR, TLR2, CCL5, CD38, RHBDF2, HLA-DRB1, SRGN, LYN, PLEK, CRTAM, FCGR2B, CD40, FOXP3, CLEC4E, TLR4, APOE, ANXA1, IL6, LRRC32, TREM2, RCN3	30	geneontology_Biological_Process	0.0524476	Up
GO:0050857	positive regulation of antigen receptor-mediated signaling pathway	6/572	25/18866	8.19e-05	0.000556	0.000404	LCK, NFAM1, PTPRC, CARD11, TESPA1, CCR7	6	geneontology_Biological_Process	0.0104895	Up
GO:0002523	leukocyte migration involved in inflammatory response	5/572	16/18866	8.33e-05	0.000563	0.000409	ITGB2, ALOX5, SLAMF8, S100A9, S100A8	5	geneontology_Biological_Process	0.00874126	Up
GO:0010820	positive regulation of T cell chemotaxis	5/572	16/18866	8.33e-05	0.000563	0.000409	CCL5, XCL2, XCL1, CCR2, CXCL13	5	geneontology_Biological_Process	0.00874126	Up
GO:0035592	establishment of protein localization to extracellular region	30/572	463/18866	8.49e-05	0.000573	0.000416	LCP2, HLA-E, CD33, SYK, TLR8, TNFSF13B, ALOX5, NLRP3, CD14, FGR, TLR2, CCL5, CD38, RHBDF2, HLA-DRB1, SRGN, LYN, PLEK, CRTAM, FCGR2B, CD40, FOXP3, CLEC4E, TLR4, APOE, ANXA1, IL6, LRRC32, TREM2, RCN3	30	geneontology_Biological_Process	0.0524476	Up
GO:0006690	icosanoid metabolic process	13/572	122/18866	8.55e-05	0.000576	0.000418	DPEP2, SYK, TBXAS1, ALOX5, GGTA1, CD74, TLR2, ALOX5AP, GGT5, HPGDS, PTGES, ANXA1, PLA2G5	13	geneontology_Biological_Process	0.0227273	Up
GO:0046427	positive regulation of receptor signaling pathway via JAK-STAT	11/572	90/18866	8.61e-05	0.000579	0.00042	IL18, IL10RA, HCLS1, CSF1R, CD300A, CCL5, LYN, CD40, TNFRSF18, OSM, IL6	11	geneontology_Biological_Process	0.0192308	Up
GO:0032648	regulation of interferon-beta production	8/572	48/18866	8.8e-05	0.00059	0.000428	LILRB1, TLR8, TLR2, IRF5, TLR7, PYCARD, IRF1, TLR4	8	geneontology_Biological_Process	0.013986	Up
GO:1900274	regulation of phospholipase C activity	8/572	48/18866	8.8e-05	0.00059	0.000428	PLCB2, PTAFR, RASGRP4, GNA15, S1PR4, CD86, P2RY6, C5AR1	8	geneontology_Biological_Process	0.013986	Up
GO:0010543	regulation of platelet activation	7/572	36/18866	8.82e-05	0.00059	0.000428	SYK, FCER1G, LYN, PLEK, TLR4, APOE, PDPN	7	geneontology_Biological_Process	0.0122378	Up
GO:0010466	negative regulation of peptidase activity	21/572	272/18866	9.05e-05	0.000605	0.000439	CD27, CST7, CR1, SERPINA1, C3, SERPING1, RENBP, CSTA, RARRES1, CST3, LXN, BST2, SPOCK2, TFPI, PLAUR, PI16, SLPI, SERPINE1, PI3, ECM1, MMP9	21	geneontology_Biological_Process	0.0367133	Up
GO:0060193	positive regulation of lipase activity	10/572	76/18866	9.59e-05	0.000639	0.000464	PLCB2, PTAFR, RASGRP4, GNA15, S1PR4, CD86, CCL5, P2RY6, C5AR1, PLA2G5	10	geneontology_Biological_Process	0.0174825	Up
GO:0051092	positive regulation of NF-kappaB transcription factor activity	15/572	159/18866	0.000102	0.000681	0.000494	RIPK3, IL18, BTK, LGALS9, ITGB2, NLRP3, CARD11, TLR2, PYCARD, S100A9, CD40, TLR4, S100A8, ICAM1, AIM2	15	geneontology_Biological_Process	0.0262238	Up
GO:0090322	regulation of superoxide metabolic process	7/572	37/18866	0.000106	0.000703	0.00051	CYBA, ITGB2, SYK, ITGAM, TYROBP, CLEC7A, ACP5	7	geneontology_Biological_Process	0.0122378	Up
GO:1904994	regulation of leukocyte adhesion to vascular endothelial cell	7/572	37/18866	0.000106	0.000703	0.00051	PTAFR, ITGB2, ALOX5, CCR2, ICAM1, IL6, CXCL12	7	geneontology_Biological_Process	0.0122378	Up
GO:0051897	positive regulation of protein kinase B signaling	16/572	178/18866	0.000108	0.000715	0.000519	VAV1, IL18, PIK3R5, PIK3AP1, HCLS1, LCK, CD86, RAC2, ICOS, CCL3, CCR7, PIK3CD, CD28, CCL19, RAMP3, OSM	16	geneontology_Biological_Process	0.027972	Up
GO:0033631	cell-cell adhesion mediated by integrin	5/572	17/18866	0.000115	0.00076	0.000552	FERMT3, SKAP1, CD3E, CCL5, CXCL13	5	geneontology_Biological_Process	0.00874126	Up
GO:0048535	lymph node development	5/572	17/18866	0.000115	0.00076	0.000552	RIPK3, LTB, IL7R, CD248, PDPN	5	geneontology_Biological_Process	0.00874126	Up
GO:0034767	positive regulation of ion transmembrane transport	15/572	161/18866	0.000118	0.000776	0.000563	PTAFR, CTSS, KCNQ1, XCL1, CCR2, P2RY6, STAC3, CXCL9, CXCL10, ACSL5, CXCL11, CCL2, RAMP3, APLNR, TREM2	15	geneontology_Biological_Process	0.0262238	Up
GO:0032608	interferon-beta production	8/572	50/18866	0.000119	0.000782	0.000567	LILRB1, TLR8, TLR2, IRF5, TLR7, PYCARD, IRF1, TLR4	8	geneontology_Biological_Process	0.013986	Up
GO:0046596	regulation of viral entry into host cell	7/572	38/18866	0.000127	0.00083	0.000602	LGALS9, CD4, CD74, HLA-DRB1, FCN1, IFITM1, PTX3	7	geneontology_Biological_Process	0.0122378	Up
GO:0071604	transforming growth factor beta production	7/572	38/18866	0.000127	0.00083	0.000602	LGALS9, TYROBP, NRROS, XCL1, FOXP3, LRRC32, LUM	7	geneontology_Biological_Process	0.0122378	Up
GO:0019079	viral genome replication	13/572	127/18866	0.000129	0.000845	0.000613	CCL5, CXCR6, APOBEC3H, CCL8, CD209, CD28, CCL2, IFI27, IFITM1, OAS1, BST2, OASL, SLPI	13	geneontology_Biological_Process	0.0227273	Up
GO:2000116	regulation of cysteine-type endopeptidase activity	19/572	239/18866	0.000132	0.000864	0.000627	LGALS9, SYK, CARD9, LCK, NLRP3, CASP1, CLEC7A, CD27, CST7, FASLG, PYCARD, LGMN, S100A9, TNFSF10, PSMB9, S100A8, AIM2, PLAUR, MMP9	19	geneontology_Biological_Process	0.0332168	Up
GO:0002762	negative regulation of myeloid leukocyte differentiation	8/572	51/18866	0.000137	0.000895	0.00065	LILRB4, INPP5D, LILRB1, C1QC, LILRB3, CCL3, LYN, TLR4	8	geneontology_Biological_Process	0.013986	Up
GO:1903034	regulation of response to wounding	16/572	183/18866	0.000149	0.000972	0.000705	SYK, ALOX5, FCER1G, CLEC7A, LYN, PLEK, SERPING1, SIGLEC10, TLR4, PLAU, APOE, ANXA1, TFPI, PLAUR, SERPINE1, PDPN	16	geneontology_Biological_Process	0.027972	Up
GO:0046598	positive regulation of viral entry into host cell	4/572	10/18866	0.000152	0.000981	0.000712	LGALS9, CD4, CD74, HLA-DRB1	4	geneontology_Biological_Process	0.00699301	Up
GO:0048304	positive regulation of isotype switching to IgG isotypes	4/572	10/18866	0.000152	0.000981	0.000712	PTPRC, TBX21, CD28, CD40	4	geneontology_Biological_Process	0.00699301	Up
GO:0070391	response to lipoteichoic acid	4/572	10/18866	0.000152	0.000981	0.000712	CD14, TLR2, TLR4, TREM2	4	geneontology_Biological_Process	0.00699301	Up
GO:0071223	cellular response to lipoteichoic acid	4/572	10/18866	0.000152	0.000981	0.000712	CD14, TLR2, TLR4, TREM2	4	geneontology_Biological_Process	0.00699301	Up
GO:0075294	positive regulation by symbiont of entry into host	4/572	10/18866	0.000152	0.000981	0.000712	LGALS9, CD4, CD74, HLA-DRB1	4	geneontology_Biological_Process	0.00699301	Up
GO:0017157	regulation of exocytosis	18/572	222/18866	0.000154	0.000994	0.000721	VAMP8, PTAFR, LGALS9, ITGB2, SYK, ITGAM, CD300A, FCER1G, FGR, CD84, RAC2, CCR2, LYN, FCGR2B, STXBP2, HLA-F, ANXA1, HMOX1	18	geneontology_Biological_Process	0.0314685	Up
GO:0150078	positive regulation of neuroinflammatory response	5/572	18/18866	0.000155	0.001	0.000726	IL18, CTSC, CCL3, IL6, TREM2	5	geneontology_Biological_Process	0.00874126	Up
GO:0002223	stimulatory C-type lectin receptor signaling pathway	12/572	113/18866	0.000164	0.00105	0.000765	PSMB10, SYK, CARD9, FCER1G, ICAM3, CLEC4A, CARD11, CLEC10A, LYN, CD209, CLEC4E, PSMB9	12	geneontology_Biological_Process	0.020979	Up
GO:0050829	defense response to Gram-negative bacterium	10/572	81/18866	0.000165	0.00106	0.000766	CD4, MPEG1, RNASE6, PYCARD, LYZ, TLR4, IL6, CTSG, SERPINE1, DEFB1	10	geneontology_Biological_Process	0.0174825	Up
GO:0051279	regulation of release of sequestered calcium ion into cytosol	10/572	81/18866	0.000165	0.00106	0.000766	PTPN6, CORO1A, CYBA, XCL1, LYN, P2RY6, CXCL9, CXCL10, CXCL11, APLNR	10	geneontology_Biological_Process	0.0174825	Up
GO:0034142	toll-like receptor 4 signaling pathway	7/572	40/18866	0.000177	0.00113	0.000824	ITGB2, SCIMP, PIK3AP1, ITGAM, CD14, LYN, TLR4	7	geneontology_Biological_Process	0.0122378	Up
GO:0045671	negative regulation of osteoclast differentiation	6/572	29/18866	0.000198	0.00126	0.000918	LILRB4, INPP5D, LILRB1, LILRB3, CCL3, TLR4	6	geneontology_Biological_Process	0.0104895	Up
GO:0050901	leukocyte tethering or rolling	6/572	29/18866	0.000198	0.00126	0.000918	PTAFR, SELPLG, SELL, SPN, CCR2, CXCL12	6	geneontology_Biological_Process	0.0104895	Up
GO:0072593	reactive oxygen species metabolic process	21/572	288/18866	0.000201	0.00128	0.000928	RIPK3, NCF1, VAV1, NCF4, CYBA, ITGB2, AIF1, SYK, ITGAM, CYBB, ALOX5, TYROBP, RAC2, CLEC7A, TLR2, NRROS, NCF2, TLR4, ICAM1, PTX3, ACP5	21	geneontology_Biological_Process	0.0367133	Up
GO:0010744	positive regulation of macrophage derived foam cell differentiation	5/572	19/18866	0.000206	0.0013	0.000946	IL18, CSF1, MSR1, PLA2G2A, PLA2G5	5	geneontology_Biological_Process	0.00874126	Up
GO:0046629	gamma-delta T cell activation	5/572	19/18866	0.000206	0.0013	0.000946	JAML, LILRB1, SYK, PTPRC, NCKAP1L	5	geneontology_Biological_Process	0.00874126	Up
GO:0098543	detection of other organism	5/572	19/18866	0.000206	0.0013	0.000946	CLEC7A, TLR2, HLA-DRB1, HLA-B, TLR4	5	geneontology_Biological_Process	0.00874126	Up
GO:0010524	positive regulation of calcium ion transport into cytosol	8/572	54/18866	0.000207	0.00131	0.000948	CD4, XCL1, P2RY6, CXCL9, CXCL10, CXCL11, RAMP3, APLNR	8	geneontology_Biological_Process	0.013986	Up
GO:1904892	regulation of receptor signaling pathway via STAT	14/572	151/18866	0.000207	0.00131	0.000948	IL18, IL10RA, HCLS1, CSF1R, CD300A, PTPRC, CCL5, LYN, CD40, JAK3, TNFRSF18, IL7R, OSM, IL6	14	geneontology_Biological_Process	0.0244755	Up
GO:2001056	positive regulation of cysteine-type endopeptidase activity	14/572	151/18866	0.000207	0.00131	0.000948	LGALS9, SYK, CARD9, LCK, NLRP3, CASP1, CLEC7A, FASLG, PYCARD, LGMN, S100A9, TNFSF10, S100A8, AIM2	14	geneontology_Biological_Process	0.0244755	Up
GO:0038083	peptidyl-tyrosine autophosphorylation	7/572	41/18866	0.000208	0.00131	0.000952	HCK, SYK, SLA, LCK, FGR, ZAP70, LYN	7	geneontology_Biological_Process	0.0122378	Up
GO:0045628	regulation of T-helper 2 cell differentiation	4/572	11/18866	0.000233	0.00146	0.00106	IL18, NLRP3, CD86, ANXA1	4	geneontology_Biological_Process	0.00699301	Up
GO:0045657	positive regulation of monocyte differentiation	4/572	11/18866	0.000233	0.00146	0.00106	CD4, CSF1, CD74, HLA-DRB1	4	geneontology_Biological_Process	0.00699301	Up
GO:0046643	regulation of gamma-delta T cell activation	4/572	11/18866	0.000233	0.00146	0.00106	LILRB1, SYK, PTPRC, NCKAP1L	4	geneontology_Biological_Process	0.00699301	Up
GO:2000551	regulation of T-helper 2 cell cytokine production	4/572	11/18866	0.000233	0.00146	0.00106	NLRP3, XCL1, TBX21, IL6	4	geneontology_Biological_Process	0.00699301	Up
GO:0032728	positive regulation of interferon-beta production	6/572	30/18866	0.000241	0.00151	0.00109	TLR8, TLR2, IRF5, TLR7, IRF1, TLR4	6	geneontology_Biological_Process	0.0104895	Up
GO:0045639	positive regulation of myeloid cell differentiation	11/572	101/18866	0.000244	0.00152	0.0011	INPP5D, CD4, HCLS1, EVI2B, TYROBP, CSF1, CD74, CCR1, HLA-DRB1, NCKAP1L, TREM2	11	geneontology_Biological_Process	0.0192308	Up
GO:0070304	positive regulation of stress-activated protein kinase signaling cascade	15/572	172/18866	0.000245	0.00152	0.00111	NCF1, FGD2, SCIMP, SYK, CARD9, MAP4K1, SLAMF1, CD27, PYCARD, LYN, CCR7, FCGR2B, TLR4, CCL19, DKK1	15	geneontology_Biological_Process	0.0262238	Up
GO:0002262	myeloid cell homeostasis	14/572	154/18866	0.000254	0.00158	0.00115	INPP5D, SPI1, HCLS1, IKZF1, FCER1G, NCKAP1L, CCR2, LYN, PIK3CD, FOXP3, JAK3, ANXA1, IL6, HMOX1	14	geneontology_Biological_Process	0.0244755	Up
GO:0014065	phosphatidylinositol 3-kinase signaling	14/572	154/18866	0.000254	0.00158	0.00115	NCF1, PTPN6, IL18, PIK3R5, PIK3AP1, HCLS1, HCST, FGR, CCL5, LYN, PIK3CD, CD28, OSM, DCN	14	geneontology_Biological_Process	0.0244755	Up
GO:1901222	regulation of NIK, NF-kappaB signaling	12/572	119/18866	0.000267	0.00165	0.0012	IL18, LGALS9, NLRP3, CD86, CD14, HAVCR2, TLR2, CD27, TLR7, TLR4, CCL19, TREM2	12	geneontology_Biological_Process	0.020979	Up
GO:0002726	positive regulation of T cell cytokine production	5/572	20/18866	0.000267	0.00165	0.0012	SASH3, IL18, NLRP3, XCL1, IL6	5	geneontology_Biological_Process	0.00874126	Up
GO:1903307	positive regulation of regulated secretory pathway	8/572	56/18866	0.000268	0.00165	0.0012	VAMP8, PTAFR, ITGB2, SYK, ITGAM, FCER1G, FGR, HLA-F	8	geneontology_Biological_Process	0.013986	Up
GO:1903901	negative regulation of viral life cycle	10/572	86/18866	0.000271	0.00167	0.00121	CCL5, APOBEC3H, CCL8, FCN1, IFITM1, OAS1, BST2, OASL, PTX3, SLPI	10	geneontology_Biological_Process	0.0174825	Up
GO:0042531	positive regulation of tyrosine phosphorylation of STAT protein	9/572	71/18866	0.000284	0.00175	0.00127	IL18, HCLS1, CSF1R, CCL5, LYN, CD40, TNFRSF18, OSM, IL6	9	geneontology_Biological_Process	0.0157343	Up
GO:0034368	protein-lipid complex remodeling	6/572	31/18866	0.000292	0.00179	0.0013	CETP, PLTP, PLA2G2A, APOC1, APOE, PLA2G5	6	geneontology_Biological_Process	0.0104895	Up
GO:0034369	plasma lipoprotein particle remodeling	6/572	31/18866	0.000292	0.00179	0.0013	CETP, PLTP, PLA2G2A, APOC1, APOE, PLA2G5	6	geneontology_Biological_Process	0.0104895	Up
GO:0046330	positive regulation of JNK cascade	13/572	138/18866	0.000296	0.00181	0.00132	NCF1, FGD2, SYK, CARD9, MAP4K1, SLAMF1, CD27, PYCARD, CCR7, FCGR2B, TLR4, CCL19, DKK1	13	geneontology_Biological_Process	0.0227273	Up
GO:0060760	positive regulation of response to cytokine stimulus	8/572	57/18866	0.000304	0.00186	0.00135	CASP4, CSF1, CASP1, CD74, TLR2, CD300LF, TLR4, TREM2	8	geneontology_Biological_Process	0.013986	Up
GO:0043491	protein kinase B signaling	20/572	278/18866	0.000337	0.00205	0.00149	VAV1, IL18, PIK3R5, PIK3AP1, HCLS1, LCK, CD86, RAC2, CCL5, ICOS, CCL3, CCR7, PIK3CD, CD28, CD40, CCL2, CCL19, RAMP3, OSM, RCN3	20	geneontology_Biological_Process	0.034965	Up
GO:0002713	negative regulation of B cell mediated immunity	4/572	12/18866	0.000341	0.00205	0.00149	PTPN6, CR1, FCGR2B, FOXP3	4	geneontology_Biological_Process	0.00699301	Up
GO:0002730	regulation of dendritic cell cytokine production	4/572	12/18866	0.000341	0.00205	0.00149	SCIMP, JAK3, TLR4, BST2	4	geneontology_Biological_Process	0.00699301	Up
GO:0002890	negative regulation of immunoglobulin mediated immune response	4/572	12/18866	0.000341	0.00205	0.00149	PTPN6, CR1, FCGR2B, FOXP3	4	geneontology_Biological_Process	0.00699301	Up
GO:0002923	regulation of humoral immune response mediated by circulating immunoglobulin	4/572	12/18866	0.000341	0.00205	0.00149	PTPN6, PTPRC, CR1, FCGR2B	4	geneontology_Biological_Process	0.00699301	Up
GO:0032621	interleukin-18 production	4/572	12/18866	0.000341	0.00205	0.00149	NLRP3, CD84, TLR2, GBP5	4	geneontology_Biological_Process	0.00699301	Up
GO:0032905	transforming growth factor beta1 production	4/572	12/18866	0.000341	0.00205	0.00149	TYROBP, NRROS, FOXP3, LUM	4	geneontology_Biological_Process	0.00699301	Up
GO:0035739	CD4-positive, alpha-beta T cell proliferation	4/572	12/18866	0.000341	0.00205	0.00149	LGALS9, VSIR, XCL1, CD55	4	geneontology_Biological_Process	0.00699301	Up
GO:0036005	response to macrophage colony-stimulating factor	4/572	12/18866	0.000341	0.00205	0.00149	CSF1R, CSF1, TLR2, TLR4	4	geneontology_Biological_Process	0.00699301	Up
GO:0036006	cellular response to macrophage colony-stimulating factor stimulus	4/572	12/18866	0.000341	0.00205	0.00149	CSF1R, CSF1, TLR2, TLR4	4	geneontology_Biological_Process	0.00699301	Up
GO:2000561	regulation of CD4-positive, alpha-beta T cell proliferation	4/572	12/18866	0.000341	0.00205	0.00149	LGALS9, VSIR, XCL1, CD55	4	geneontology_Biological_Process	0.00699301	Up
GO:0032616	interleukin-13 production	5/572	21/18866	0.000342	0.00206	0.00149	IL18, HLA-E, LGALS9, NLRP3, LILRA5	5	geneontology_Biological_Process	0.00874126	Up
GO:0031638	zymogen activation	8/572	58/18866	0.000343	0.00206	0.00149	VSIR, PYCARD, CTSZ, LGMN, C1R, CLEC3B, PLAU, SERPINE1	8	geneontology_Biological_Process	0.013986	Up
GO:0010743	regulation of macrophage derived foam cell differentiation	6/572	32/18866	0.00035	0.00209	0.00151	IL18, CSF1, MSR1, CETP, PLA2G2A, PLA2G5	6	geneontology_Biological_Process	0.0104895	Up
GO:0034367	protein-containing complex remodeling	6/572	32/18866	0.00035	0.00209	0.00151	CETP, PLTP, PLA2G2A, APOC1, APOE, PLA2G5	6	geneontology_Biological_Process	0.0104895	Up
GO:0035456	response to interferon-beta	6/572	32/18866	0.00035	0.00209	0.00151	PYHIN1, MNDA, IRF1, IFITM1, BST2, AIM2	6	geneontology_Biological_Process	0.0104895	Up
GO:0071353	cellular response to interleukin-4	6/572	32/18866	0.00035	0.00209	0.00151	CORO1A, IL2RG, XCL1, CD300LF, MRC1, JAK3	6	geneontology_Biological_Process	0.0104895	Up
GO:0010951	negative regulation of endopeptidase activity	19/572	258/18866	0.000352	0.00209	0.00152	CD27, CST7, CR1, SERPINA1, C3, SERPING1, RENBP, CSTA, RARRES1, CST3, LXN, BST2, SPOCK2, TFPI, PLAUR, SLPI, SERPINE1, PI3, MMP9	19	geneontology_Biological_Process	0.0332168	Up
GO:0007260	tyrosine phosphorylation of STAT protein	10/572	89/18866	0.000359	0.00214	0.00155	IL18, HCLS1, CSF1R, CCL5, LYN, CD40, JAK3, TNFRSF18, OSM, IL6	10	geneontology_Biological_Process	0.0174825	Up
GO:2000379	positive regulation of reactive oxygen species metabolic process	11/572	106/18866	0.000372	0.00221	0.0016	RIPK3, CYBA, ITGB2, AIF1, SYK, ITGAM, TYROBP, CLEC7A, TLR4, ICAM1, PTX3	11	geneontology_Biological_Process	0.0192308	Up
GO:0014002	astrocyte development	7/572	45/18866	0.000379	0.00224	0.00163	C1QA, S100A9, TLR4, S100A8, C5AR1, IL6, TREM2	7	geneontology_Biological_Process	0.0122378	Up
GO:0052372	modulation by symbiont of entry into host	7/572	45/18866	0.000379	0.00224	0.00163	LGALS9, CD4, CD74, HLA-DRB1, FCN1, IFITM1, PTX3	7	geneontology_Biological_Process	0.0122378	Up
GO:0046425	regulation of receptor signaling pathway via JAK-STAT	13/572	142/18866	0.000391	0.00231	0.00168	IL18, IL10RA, HCLS1, CSF1R, CD300A, PTPRC, CCL5, LYN, CD40, JAK3, TNFRSF18, OSM, IL6	13	geneontology_Biological_Process	0.0227273	Up
GO:0033028	myeloid cell apoptotic process	6/572	33/18866	0.000417	0.00246	0.00178	FCER1G, CCR5, CCL5, PIK3CD, ANXA1, IL6	6	geneontology_Biological_Process	0.0104895	Up
GO:0034104	negative regulation of tissue remodeling	5/572	22/18866	0.000432	0.00254	0.00184	INPP5D, CD38, CST3, IL6, TMEM119	5	geneontology_Biological_Process	0.00874126	Up
GO:0045655	regulation of monocyte differentiation	5/572	22/18866	0.000432	0.00254	0.00184	INPP5D, CD4, CSF1, CD74, HLA-DRB1	5	geneontology_Biological_Process	0.00874126	Up
GO:0002371	dendritic cell cytokine production	4/572	13/18866	0.000481	0.00281	0.00204	SCIMP, JAK3, TLR4, BST2	4	geneontology_Biological_Process	0.00699301	Up
GO:0033089	positive regulation of T cell differentiation in thymus	4/572	13/18866	0.000481	0.00281	0.00204	VNN1, TESPA1, FOXP3, IL7R	4	geneontology_Biological_Process	0.00699301	Up
GO:1903977	positive regulation of glial cell migration	4/572	13/18866	0.000481	0.00281	0.00204	CSF1, CCL3, CCR2, TREM2	4	geneontology_Biological_Process	0.00699301	Up
GO:0045071	negative regulation of viral genome replication	8/572	61/18866	0.000487	0.00284	0.00206	CCL5, APOBEC3H, CCL8, IFITM1, OAS1, BST2, OASL, SLPI	8	geneontology_Biological_Process	0.013986	Up
GO:0018149	peptide cross-linking	6/572	34/18866	0.000494	0.00288	0.00209	F13A1, CSTA, ANXA1, SPOCK2, DCN, PI3	6	geneontology_Biological_Process	0.0104895	Up
GO:0055094	response to lipoprotein particle	6/572	34/18866	0.000494	0.00288	0.00209	ITGB2, SYK, FCER1G, CD68, TLR4, APOE	6	geneontology_Biological_Process	0.0104895	Up
GO:0007157	heterophilic cell-cell adhesion via plasma membrane cell adhesion molecules	7/572	47/18866	0.000498	0.00289	0.0021	JAML, ITGAL, CD6, CRTAM, CD209, ICAM1, CADM3	7	geneontology_Biological_Process	0.0122378	Up
GO:0030574	collagen catabolic process	7/572	47/18866	0.000498	0.00289	0.0021	CTSS, VSIR, CST3, MMP19, ADAMTS2, MMP2, MMP9	7	geneontology_Biological_Process	0.0122378	Up
GO:0038061	NIK, NF-kappaB signaling	15/572	184/18866	0.000504	0.00292	0.00212	RIPK3, IL18, LGALS9, PSMB10, NLRP3, CD86, CD14, HAVCR2, TLR2, CD27, TLR7, PSMB9, TLR4, CCL19, TREM2	15	geneontology_Biological_Process	0.0262238	Up
GO:0051702	interaction with symbiont	10/572	93/18866	0.000513	0.00297	0.00216	CSF1R, CCL4, CCL5, CCL3, CCL8, APOL1, IFI27, APOE, PTX3, CTSG	10	geneontology_Biological_Process	0.0174825	Up
GO:0050860	negative regulation of T cell receptor signaling pathway	5/572	23/18866	0.000538	0.00311	0.00226	PTPN6, LILRB4, SLA2, SH2D1A, UBASH3A	5	geneontology_Biological_Process	0.00874126	Up
GO:0034113	heterotypic cell-cell adhesion	8/572	62/18866	0.000544	0.00314	0.00228	ITGB2, LILRB2, LCK, SKAP1, CD2, PTPRC, CD200R1, ITGAX	8	geneontology_Biological_Process	0.013986	Up
GO:0051851	modulation by host of symbiont process	8/572	62/18866	0.000544	0.00314	0.00228	CSF1R, CCL4, CCL5, CCL3, CCL8, IFI27, APOE, PTX3	8	geneontology_Biological_Process	0.013986	Up
GO:1904064	positive regulation of cation transmembrane transport	13/572	147/18866	0.000545	0.00314	0.00228	CTSS, KCNQ1, XCL1, CCR2, P2RY6, STAC3, CXCL9, CXCL10, CXCL11, CCL2, RAMP3, APLNR, TREM2	13	geneontology_Biological_Process	0.0227273	Up
GO:0070670	response to interleukin-4	6/572	35/18866	0.000581	0.00334	0.00242	CORO1A, IL2RG, XCL1, CD300LF, MRC1, JAK3	6	geneontology_Biological_Process	0.0104895	Up
GO:0070588	calcium ion transmembrane transport	21/572	312/18866	0.000584	0.00335	0.00243	PTPN6, CORO1A, CYBA, TRPM2, LCK, PTPRC, CCR5, TMEM37, FASLG, CCL3, XCL1, LYN, CCR7, P2RY6, STAC3, CXCL9, CXCL10, CXCL11, CCL19, RAMP3, APLNR	21	geneontology_Biological_Process	0.0367133	Up
GO:0032963	collagen metabolic process	11/572	113/18866	0.000644	0.00369	0.00268	CTSS, VSIR, CIITA, CST3, MMP19, IL6, TNXB, ADAMTS2, RCN3, MMP2, MMP9	11	geneontology_Biological_Process	0.0192308	Up
GO:0070234	positive regulation of T cell apoptotic process	4/572	14/18866	0.000657	0.00375	0.00273	LGALS9, CCL5, PDCD1, IDO1	4	geneontology_Biological_Process	0.00699301	Up
GO:0070486	leukocyte aggregation	4/572	14/18866	0.000657	0.00375	0.00273	ZAP70, RAC2, S100A9, S100A8	4	geneontology_Biological_Process	0.00699301	Up
GO:0045453	bone resorption	8/572	64/18866	0.000676	0.00386	0.0028	INPP5D, SYK, CSF1R, RAC2, CD38, IL6, TMEM119, ACP5	8	geneontology_Biological_Process	0.013986	Up
GO:0071402	cellular response to lipoprotein particle stimulus	6/572	36/18866	0.000679	0.00386	0.0028	ITGB2, SYK, FCER1G, CD68, TLR4, APOE	6	geneontology_Biological_Process	0.0104895	Up
GO:0071634	regulation of transforming growth factor beta production	6/572	36/18866	0.000679	0.00386	0.0028	LGALS9, TYROBP, XCL1, FOXP3, LRRC32, LUM	6	geneontology_Biological_Process	0.0104895	Up
GO:0032874	positive regulation of stress-activated MAPK cascade	14/572	170/18866	0.000693	0.00394	0.00286	NCF1, FGD2, SCIMP, SYK, CARD9, MAP4K1, SLAMF1, CD27, PYCARD, CCR7, FCGR2B, TLR4, CCL19, DKK1	14	geneontology_Biological_Process	0.0244755	Up
GO:0009988	cell-cell recognition	9/572	80/18866	0.000695	0.00394	0.00286	DOCK2, HAVCR2, DOCK8, PRF1, FOLR2, CD6, CCR7, CD209, CCL19	9	geneontology_Biological_Process	0.0157343	Up
GO:0034764	positive regulation of transmembrane transport	16/572	210/18866	0.000697	0.00395	0.00287	PTAFR, CTSS, KCNQ1, XCL1, CCR2, C3, P2RY6, STAC3, CXCL9, CXCL10, ACSL5, CXCL11, CCL2, RAMP3, APLNR, TREM2	16	geneontology_Biological_Process	0.027972	Up
GO:1901216	positive regulation of neuron death	10/572	97/18866	0.000716	0.00405	0.00294	ITGB2, ITGAM, TYROBP, C1QA, FASLG, CCL3, CTSZ, FCGR2B, TLR4, DKK1	10	geneontology_Biological_Process	0.0174825	Up
GO:0051047	positive regulation of secretion	22/572	340/18866	0.00074	0.00418	0.00303	VAMP8, PTAFR, HLA-E, CD33, CYBA, ITGB2, SYK, ITGAM, CD14, FCER1G, FGR, TLR2, CD38, HLA-DRB1, CRTAM, CLEC4E, HLA-F, TLR4, S100A8, IL6, CXCL12, TREM2	22	geneontology_Biological_Process	0.0384615	Up
GO:0031640	killing of cells of other organism	8/572	65/18866	0.00075	0.00423	0.00307	SYK, PRF1, CLEC7A, LYZ, CCL13, APOL1, GNLY, CTSG	8	geneontology_Biological_Process	0.013986	Up
GO:0043280	positive regulation of cysteine-type endopeptidase activity involved in apoptotic process	12/572	134/18866	0.000788	0.00444	0.00322	LGALS9, SYK, CARD9, LCK, NLRP3, CASP1, CLEC7A, FASLG, PYCARD, S100A9, TNFSF10, S100A8	12	geneontology_Biological_Process	0.020979	Up
GO:0032647	regulation of interferon-alpha production	5/572	25/18866	0.000809	0.00454	0.0033	TLR8, HAVCR2, IRF5, TLR7, TLR4	5	geneontology_Biological_Process	0.00874126	Up
GO:0034162	toll-like receptor 9 signaling pathway	5/572	25/18866	0.000809	0.00454	0.0033	PIK3AP1, TLR8, UNC93B1, HAVCR2, TLR7	5	geneontology_Biological_Process	0.00874126	Up
GO:0051817	modulation of process of other organism involved in symbiotic interaction	10/572	99/18866	0.000841	0.00472	0.00342	CD4, CSF1R, CCL4, CCL5, CCL3, CCL8, CD209, IFI27, APOE, PTX3	10	geneontology_Biological_Process	0.0174825	Up
GO:1901214	regulation of neuron death	21/572	321/18866	0.000842	0.00472	0.00342	CORO1A, ITGB2, ITGAM, TYROBP, C1QA, TNFRSF1B, CSF1, CD200R1, CCL5, FASLG, CCL3, CTSZ, LGMN, FCGR2B, HLA-F, CCL2, TLR4, C5AR1, DKK1, APOE, HMOX1	21	geneontology_Biological_Process	0.0367133	Up
GO:0001845	phagolysosome assembly	4/572	15/18866	0.000874	0.00482	0.0035	CORO1A, MYO7A, RAB20, PLA2G5	4	geneontology_Biological_Process	0.00699301	Up
GO:0002281	macrophage activation involved in immune response	4/572	15/18866	0.000874	0.00482	0.0035	SYK, TYROBP, HAVCR2, TREM2	4	geneontology_Biological_Process	0.00699301	Up
GO:0023035	CD40 signaling pathway	4/572	15/18866	0.000874	0.00482	0.0035	CD86, SLAMF1, CD40, TREM2	4	geneontology_Biological_Process	0.00699301	Up
GO:0030852	regulation of granulocyte differentiation	4/572	15/18866	0.000874	0.00482	0.0035	INPP5D, HCLS1, EVI2B, C1QC	4	geneontology_Biological_Process	0.00699301	Up
GO:0034134	toll-like receptor 2 signaling pathway	4/572	15/18866	0.000874	0.00482	0.0035	CYBA, PIK3AP1, TLR2, LYN	4	geneontology_Biological_Process	0.00699301	Up
GO:0035745	T-helper 2 cell cytokine production	4/572	15/18866	0.000874	0.00482	0.0035	NLRP3, XCL1, TBX21, IL6	4	geneontology_Biological_Process	0.00699301	Up
GO:0043374	CD8-positive, alpha-beta T cell differentiation	4/572	15/18866	0.000874	0.00482	0.0035	TNFSF8, NCKAP1L, EOMES, IRF1	4	geneontology_Biological_Process	0.00699301	Up
GO:0045779	negative regulation of bone resorption	4/572	15/18866	0.000874	0.00482	0.0035	INPP5D, CD38, IL6, TMEM119	4	geneontology_Biological_Process	0.00699301	Up
GO:0050862	positive regulation of T cell receptor signaling pathway	4/572	15/18866	0.000874	0.00482	0.0035	LCK, CARD11, TESPA1, CCR7	4	geneontology_Biological_Process	0.00699301	Up
GO:0060099	regulation of phagocytosis, engulfment	4/572	15/18866	0.000874	0.00482	0.0035	CD300A, NCKAP1L, C3, TREM2	4	geneontology_Biological_Process	0.00699301	Up
GO:0090594	inflammatory response to wounding	4/572	15/18866	0.000874	0.00482	0.0035	ALOX5, CCR2, SIGLEC10, HMOX1	4	geneontology_Biological_Process	0.00699301	Up
GO:0045069	regulation of viral genome replication	10/572	100/18866	0.00091	0.00499	0.00362	CCL5, APOBEC3H, CCL8, CD28, IFI27, IFITM1, OAS1, BST2, OASL, SLPI	10	geneontology_Biological_Process	0.0174825	Up
GO:0051056	regulation of small GTPase mediated signal transduction	21/572	323/18866	0.000911	0.00499	0.00362	ARHGAP30, VAV1, FGD3, RASAL3, CYTH4, FGD2, ARHGAP9, ARHGAP45, RASGRP4, GPR65, ARHGAP4, CSF1, P2RY8, RHOH, RAC2, FBP1, LYN, ARHGAP15, TAGAP, P2RY10, APOE	21	geneontology_Biological_Process	0.0367133	Up
GO:0010742	macrophage derived foam cell differentiation	6/572	38/18866	0.000914	0.00499	0.00362	IL18, CSF1, MSR1, CETP, PLA2G2A, PLA2G5	6	geneontology_Biological_Process	0.0104895	Up
GO:0030224	monocyte differentiation	6/572	38/18866	0.000914	0.00499	0.00362	INPP5D, CD4, CSF1R, CSF1, CD74, HLA-DRB1	6	geneontology_Biological_Process	0.0104895	Up
GO:0071276	cellular response to cadmium ion	6/572	38/18866	0.000914	0.00499	0.00362	NCF1, CYBB, HMOX1, MT1F, MT2A, MMP9	6	geneontology_Biological_Process	0.0104895	Up
GO:0090077	foam cell differentiation	6/572	38/18866	0.000914	0.00499	0.00362	IL18, CSF1, MSR1, CETP, PLA2G2A, PLA2G5	6	geneontology_Biological_Process	0.0104895	Up
GO:1903131	mononuclear cell differentiation	6/572	38/18866	0.000914	0.00499	0.00362	INPP5D, CD4, CSF1R, CSF1, CD74, HLA-DRB1	6	geneontology_Biological_Process	0.0104895	Up
GO:1900015	regulation of cytokine production involved in inflammatory response	8/572	67/18866	0.00092	0.00502	0.00364	GPSM3, ALOX5, CLEC7A, PYCARD, CD6, GBP5, TLR4, IL6	8	geneontology_Biological_Process	0.013986	Up
GO:1901568	fatty acid derivative metabolic process	14/572	175/18866	0.000921	0.00502	0.00364	DPEP2, SYK, TBXAS1, ALOX5, GGTA1, CD74, TLR2, ALOX5AP, ACSL5, GGT5, HPGDS, PTGES, ANXA1, PLA2G5	14	geneontology_Biological_Process	0.0244755	Up
GO:0060759	regulation of response to cytokine stimulus	15/572	196/18866	0.000968	0.00527	0.00382	PTPN6, SYK, CASP4, PTPRC, CSF1, CASP1, CD74, TLR2, CCL5, PYCARD, CD300LF, TLR4, IL6, TREM2, ECM1	15	geneontology_Biological_Process	0.0262238	Up
GO:0042104	positive regulation of activated T cell proliferation	5/572	26/18866	0.000976	0.0053	0.00385	IL18, IL12RB1, IL2RA, PYCARD, TNFSF9	5	geneontology_Biological_Process	0.00874126	Up
GO:0030838	positive regulation of actin filament polymerization	10/572	101/18866	0.000983	0.00533	0.00387	WAS, GMFG, HCK, CORO1A, NCKAP1L, PYCARD, CCR7, CDC42EP2, ICAM1, CCL26	10	geneontology_Biological_Process	0.0174825	Up
GO:0055069	zinc ion homeostasis	6/572	39/18866	0.00105	0.0057	0.00414	TMC8, LCK, S100A9, S100A8, MT1F, MT2A	6	geneontology_Biological_Process	0.0104895	Up
GO:0001780	neutrophil homeostasis	4/572	16/18866	0.00114	0.00611	0.00444	CCR2, PIK3CD, ANXA1, IL6	4	geneontology_Biological_Process	0.00699301	Up
GO:0033008	positive regulation of mast cell activation involved in immune response	4/572	16/18866	0.00114	0.00611	0.00444	VAMP8, SYK, FCER1G, FGR	4	geneontology_Biological_Process	0.00699301	Up
GO:0034374	low-density lipoprotein particle remodeling	4/572	16/18866	0.00114	0.00611	0.00444	CETP, PLA2G2A, APOE, PLA2G5	4	geneontology_Biological_Process	0.00699301	Up
GO:0043306	positive regulation of mast cell degranulation	4/572	16/18866	0.00114	0.00611	0.00444	VAMP8, SYK, FCER1G, FGR	4	geneontology_Biological_Process	0.00699301	Up
GO:0050710	negative regulation of cytokine secretion	4/572	16/18866	0.00114	0.00611	0.00444	SRGN, FCGR2B, FOXP3, LRRC32	4	geneontology_Biological_Process	0.00699301	Up
GO:1905153	regulation of membrane invagination	4/572	16/18866	0.00114	0.00611	0.00444	CD300A, NCKAP1L, C3, TREM2	4	geneontology_Biological_Process	0.00699301	Up
GO:0048661	positive regulation of smooth muscle cell proliferation	10/572	103/18866	0.00114	0.00614	0.00445	PTAFR, IL18, CYBA, AIF1, CCL5, P2RY6, IL6, HMOX1, MMP2, MMP9	10	geneontology_Biological_Process	0.0174825	Up
GO:0032607	interferon-alpha production	5/572	27/18866	0.00117	0.00626	0.00454	TLR8, HAVCR2, IRF5, TLR7, TLR4	5	geneontology_Biological_Process	0.00874126	Up
GO:0042509	regulation of tyrosine phosphorylation of STAT protein	9/572	86/18866	0.00117	0.00628	0.00456	IL18, HCLS1, CSF1R, CCL5, LYN, CD40, TNFRSF18, OSM, IL6	9	geneontology_Biological_Process	0.0157343	Up
GO:0008154	actin polymerization or depolymerization	16/572	221/18866	0.0012	0.00641	0.00465	WAS, GMFG, HCK, CORO1A, AIF1, PSTPIP1, HCLS1, NCKAP1L, PYCARD, CCR7, PLEK, CDC42EP2, ICAM1, CXCL12, CCL26, GAS7	16	geneontology_Biological_Process	0.027972	Up
GO:0051281	positive regulation of release of sequestered calcium ion into cytosol	6/572	40/18866	0.00121	0.00644	0.00468	XCL1, P2RY6, CXCL9, CXCL10, CXCL11, APLNR	6	geneontology_Biological_Process	0.0104895	Up
GO:0021782	glial cell development	11/572	122/18866	0.00122	0.00649	0.00471	C1QA, TLR2, NRROS, LYN, S100A9, TLR4, S100A8, C5AR1, IL6, MXRA8, TREM2	11	geneontology_Biological_Process	0.0192308	Up
GO:0007200	phospholipase C-activating G protein-coupled receptor signaling pathway	10/572	104/18866	0.00123	0.00655	0.00476	GNA15, GPR65, C3AR1, P2RY8, FPR1, FPR3, P2RY6, P2RY10, CMKLR1, C5AR1	10	geneontology_Biological_Process	0.0174825	Up
GO:0050819	negative regulation of coagulation	7/572	55/18866	0.0013	0.00693	0.00503	SERPING1, PLAU, APOE, PROCR, TFPI, PLAUR, SERPINE1	7	geneontology_Biological_Process	0.0122378	Up
GO:0051346	negative regulation of hydrolase activity	27/572	473/18866	0.00132	0.00701	0.00509	GZMA, RHOH, CD27, CST7, NCKAP1L, CR1, SERPINA1, C3, SERPING1, RENBP, CSTA, RARRES1, CST3, LXN, APOC1, BST2, ANXA1, SPOCK2, TFPI, PLAUR, PI16, PTX3, SLPI, SERPINE1, PI3, ECM1, MMP9	27	geneontology_Biological_Process	0.0472028	Up
GO:0045765	regulation of angiogenesis	24/572	403/18866	0.00137	0.00726	0.00527	ITGB2, CYBB, ALOX5, STAB1, C3AR1, FASLG, CCR2, C3, CD40, CXCL10, CXCL13, WARS1, ITGAX, ACVRL1, C5AR1, ANXA1, IL6, HMOX1, DCN, APLNR, SERPINE1, SRPX2, ECM1, VEGFD	24	geneontology_Biological_Process	0.041958	Up
GO:0002335	mature B cell differentiation	5/572	28/18866	0.00139	0.00734	0.00533	MFNG, SLAMF8, FCGR2B, CMTM7, IL6	5	geneontology_Biological_Process	0.00874126	Up
GO:0002483	antigen processing and presentation of endogenous peptide antigen	4/572	17/18866	0.00145	0.00762	0.00553	HLA-E, HLA-B, HLA-C, HLA-F	4	geneontology_Biological_Process	0.00699301	Up
GO:0019885	antigen processing and presentation of endogenous peptide antigen via MHC class I	4/572	17/18866	0.00145	0.00762	0.00553	HLA-E, HLA-B, HLA-C, HLA-F	4	geneontology_Biological_Process	0.00699301	Up
GO:0044546	NLRP3 inflammasome complex assembly	4/572	17/18866	0.00145	0.00762	0.00553	NLRP3, GBP5, TLR4, AIM2	4	geneontology_Biological_Process	0.00699301	Up
GO:0045623	negative regulation of T-helper cell differentiation	4/572	17/18866	0.00145	0.00762	0.00553	TBX21, FOXP3, JAK3, ANXA1	4	geneontology_Biological_Process	0.00699301	Up
GO:0046851	negative regulation of bone remodeling	4/572	17/18866	0.00145	0.00762	0.00553	INPP5D, CD38, IL6, TMEM119	4	geneontology_Biological_Process	0.00699301	Up
GO:0060263	regulation of respiratory burst	4/572	17/18866	0.00145	0.00762	0.00553	RAC2, CLEC7A, SLAMF8, JCHAIN	4	geneontology_Biological_Process	0.00699301	Up
GO:0070206	protein trimerization	4/572	17/18866	0.00145	0.00762	0.00553	CD74, ALOX5AP, SCARA5, STEAP4	4	geneontology_Biological_Process	0.00699301	Up
GO:1903532	positive regulation of secretion by cell	20/572	313/18866	0.00147	0.0077	0.00559	VAMP8, PTAFR, HLA-E, CD33, ITGB2, SYK, ITGAM, CD14, FCER1G, FGR, TLR2, CD38, HLA-DRB1, CRTAM, CLEC4E, HLA-F, TLR4, IL6, CXCL12, TREM2	20	geneontology_Biological_Process	0.034965	Up
GO:0061515	myeloid cell development	8/572	72/18866	0.00148	0.00772	0.00561	PTPN6, LILRB1, EVI2B, TYROBP, TLR2, NRROS, NCKAP1L, ZNF385A	8	geneontology_Biological_Process	0.013986	Up
GO:1904427	positive regulation of calcium ion transmembrane transport	8/572	72/18866	0.00148	0.00772	0.00561	XCL1, P2RY6, STAC3, CXCL9, CXCL10, CXCL11, RAMP3, APLNR	8	geneontology_Biological_Process	0.013986	Up
GO:0032479	regulation of type I interferon production	11/572	125/18866	0.00148	0.00774	0.00561	LILRB1, SYK, TLR8, CD14, HAVCR2, TLR2, IRF5, TLR7, PYCARD, IRF1, TLR4	11	geneontology_Biological_Process	0.0192308	Up
GO:0031589	cell-substrate adhesion	22/572	359/18866	0.00149	0.00777	0.00564	FERMT3, CORO1A, PARVG, ITGB2, SKAP1, SIGLEC1, ITGAL, CD3E, MYO1G, CD96, CSF1, RAC2, CCR7, ACVRL1, PLAU, FBLN2, SPOCK2, S100A10, LYVE1, NTN4, SERPINE1, PDPN	22	geneontology_Biological_Process	0.0384615	Up
GO:0008037	cell recognition	16/572	226/18866	0.00151	0.00787	0.00571	DOCK2, HAVCR2, DOCK8, PRF1, CLEC7A, NCR3, CD5, FOLR2, CD6, CCR7, CRTAM, CD209, FCN1, CCL19, IGLL5, EMB	16	geneontology_Biological_Process	0.027972	Up
GO:0001782	B cell homeostasis	5/572	29/18866	0.00164	0.00846	0.00614	TNFSF13B, CD74, NCKAP1L, LYN, FOXP3	5	geneontology_Biological_Process	0.00874126	Up
GO:0033032	regulation of myeloid cell apoptotic process	5/572	29/18866	0.00164	0.00846	0.00614	FCER1G, CCR5, CCL5, PIK3CD, ANXA1	5	geneontology_Biological_Process	0.00874126	Up
GO:0043032	positive regulation of macrophage activation	5/572	29/18866	0.00164	0.00846	0.00614	HAVCR2, CTSC, CCL3, TLR4, TREM2	5	geneontology_Biological_Process	0.00874126	Up
GO:0048873	homeostasis of number of cells within a tissue	5/572	29/18866	0.00164	0.00846	0.00614	SASH3, CORO1A, CSF1, CCR2, IL20RB	5	geneontology_Biological_Process	0.00874126	Up
GO:0032606	type I interferon production	11/572	127/18866	0.00169	0.00871	0.00632	LILRB1, SYK, TLR8, CD14, HAVCR2, TLR2, IRF5, TLR7, PYCARD, IRF1, TLR4	11	geneontology_Biological_Process	0.0192308	Up
GO:0045766	positive regulation of angiogenesis	15/572	208/18866	0.00175	0.00904	0.00656	ITGB2, CYBB, C3AR1, C3, CD40, ITGAX, ACVRL1, C5AR1, ANXA1, HMOX1, APLNR, SERPINE1, SRPX2, ECM1, VEGFD	15	geneontology_Biological_Process	0.0262238	Up
GO:0032481	positive regulation of type I interferon production	8/572	74/18866	0.00177	0.00909	0.0066	SYK, TLR8, CD14, TLR2, IRF5, TLR7, IRF1, TLR4	8	geneontology_Biological_Process	0.013986	Up
GO:0034121	regulation of toll-like receptor signaling pathway	8/572	74/18866	0.00177	0.00909	0.0066	CYBA, CD14, CD300A, TLR2, LYN, CD300LF, IRF1, TLR4	8	geneontology_Biological_Process	0.013986	Up
GO:0045124	regulation of bone resorption	6/572	43/18866	0.00178	0.00913	0.00663	INPP5D, SYK, CSF1R, CD38, IL6, TMEM119	6	geneontology_Biological_Process	0.0104895	Up
GO:0051051	negative regulation of transport	27/572	483/18866	0.00178	0.00915	0.00664	VAMP8, CORO1A, CD33, LILRB1, LGALS9, LILRB2, TNFRSF1B, CD300A, CD84, CD74, TLR2, RHBDF2, SRGN, CCR2, CD300LF, FCGR2B, FOXP3, HLA-F, OSM, APOC1, ICAM1, APOE, BST2, ANXA1, HMOX1, LRRC32, MMP9	27	geneontology_Biological_Process	0.0472028	Up
GO:0032656	regulation of interleukin-13 production	4/572	18/18866	0.00182	0.00929	0.00674	HLA-E, LGALS9, NLRP3, LILRA5	4	geneontology_Biological_Process	0.00699301	Up
GO:0032740	positive regulation of interleukin-17 production	4/572	18/18866	0.00182	0.00929	0.00674	IL18, SLAMF6, OSM, IL6	4	geneontology_Biological_Process	0.00699301	Up
GO:0034375	high-density lipoprotein particle remodeling	4/572	18/18866	0.00182	0.00929	0.00674	CETP, PLTP, APOC1, APOE	4	geneontology_Biological_Process	0.00699301	Up
GO:0043011	myeloid dendritic cell differentiation	4/572	18/18866	0.00182	0.00929	0.00674	BATF, SPI1, BATF2, UBD	4	geneontology_Biological_Process	0.00699301	Up
GO:0043031	negative regulation of macrophage activation	4/572	18/18866	0.00182	0.00929	0.00674	PTPRC, VSIG4, CST7, FCGR2B	4	geneontology_Biological_Process	0.00699301	Up
GO:0070230	positive regulation of lymphocyte apoptotic process	4/572	18/18866	0.00182	0.00929	0.00674	LGALS9, CCL5, PDCD1, IDO1	4	geneontology_Biological_Process	0.00699301	Up
GO:0001516	prostaglandin biosynthetic process	5/572	30/18866	0.00191	0.00967	0.00702	TBXAS1, CD74, HPGDS, PTGES, ANXA1	5	geneontology_Biological_Process	0.00874126	Up
GO:0034110	regulation of homotypic cell-cell adhesion	5/572	30/18866	0.00191	0.00967	0.00702	SYK, CCL5, LYN, PLAUR, PDPN	5	geneontology_Biological_Process	0.00874126	Up
GO:0044788	modulation by host of viral process	5/572	30/18866	0.00191	0.00967	0.00702	CSF1R, CCL8, IFI27, APOE, PTX3	5	geneontology_Biological_Process	0.00874126	Up
GO:0046457	prostanoid biosynthetic process	5/572	30/18866	0.00191	0.00967	0.00702	TBXAS1, CD74, HPGDS, PTGES, ANXA1	5	geneontology_Biological_Process	0.00874126	Up
GO:0060142	regulation of syncytium formation by plasma membrane fusion	5/572	30/18866	0.00191	0.00967	0.00702	CD53, TYROBP, CXCL9, CXCL10, TREM2	5	geneontology_Biological_Process	0.00874126	Up
GO:0061082	myeloid leukocyte cytokine production	5/572	30/18866	0.00191	0.00967	0.00702	LILRB1, FCER1G, CD74, TLR4, HMOX1	5	geneontology_Biological_Process	0.00874126	Up
GO:0051896	regulation of protein kinase B signaling	17/572	253/18866	0.00192	0.00968	0.00702	VAV1, IL18, PIK3R5, PIK3AP1, HCLS1, LCK, CD86, RAC2, ICOS, CCL3, CCR7, PIK3CD, CD28, CCL19, RAMP3, OSM, RCN3	17	geneontology_Biological_Process	0.0297203	Up
GO:0015909	long-chain fatty acid transport	8/572	75/18866	0.00193	0.00971	0.00705	SYK, ACSL5, PLA2G2D, PLA2G2A, APOE, ANXA1, PLA2G5, FABP4	8	geneontology_Biological_Process	0.013986	Up
GO:0006636	unsaturated fatty acid biosynthetic process	7/572	59/18866	0.00198	0.00994	0.00721	TBXAS1, ALOX5, CD74, ALOX5AP, HPGDS, PTGES, ANXA1	7	geneontology_Biological_Process	0.0122378	Up
GO:0019731	antibacterial humoral response	7/572	59/18866	0.00198	0.00994	0.00721	HLA-E, RNASE6, JCHAIN, CTSG, SLPI, PI3, DEFB1	7	geneontology_Biological_Process	0.0122378	Up
GO:0045861	negative regulation of proteolysis	22/572	369/18866	0.0021	0.0106	0.00767	CD27, CST7, CTSZ, CR1, SERPINA1, C3, SERPING1, RENBP, CSTA, RARRES1, CST3, LXN, BST2, SPOCK2, TFPI, PLAUR, PI16, SLPI, SERPINE1, PI3, ECM1, MMP9	22	geneontology_Biological_Process	0.0384615	Up
GO:1903428	positive regulation of reactive oxygen species biosynthetic process	7/572	60/18866	0.00218	0.0109	0.00794	CYBA, ITGB2, AIF1, CLEC7A, TLR4, ICAM1, PTX3	7	geneontology_Biological_Process	0.0122378	Up
GO:0002922	positive regulation of humoral immune response	4/572	19/18866	0.00225	0.0112	0.00812	PTPRC, CCR7, C3, FCGR2B	4	geneontology_Biological_Process	0.00699301	Up
GO:0031643	positive regulation of myelination	4/572	19/18866	0.00225	0.0112	0.00812	TNFRSF1B, CST7, ITGAX, S100B	4	geneontology_Biological_Process	0.00699301	Up
GO:0045063	T-helper 1 cell differentiation	4/572	19/18866	0.00225	0.0112	0.00812	SPN, JAK3, CCL19, ANXA1	4	geneontology_Biological_Process	0.00699301	Up
GO:0061081	positive regulation of myeloid leukocyte cytokine production involved in immune response	4/572	19/18866	0.00225	0.0112	0.00812	LILRB1, FCER1G, CD74, TLR4	4	geneontology_Biological_Process	0.00699301	Up
GO:0150079	negative regulation of neuroinflammatory response	4/572	19/18866	0.00225	0.0112	0.00812	TNFRSF1B, PTPRC, CD200R1, CST7	4	geneontology_Biological_Process	0.00699301	Up
GO:1903975	regulation of glial cell migration	4/572	19/18866	0.00225	0.0112	0.00812	CSF1, CCL3, CCR2, TREM2	4	geneontology_Biological_Process	0.00699301	Up
GO:2000319	regulation of T-helper 17 cell differentiation	4/572	19/18866	0.00225	0.0112	0.00812	IL12RB1, NLRP3, TBX21, FOXP3	4	geneontology_Biological_Process	0.00699301	Up
GO:0045429	positive regulation of nitric oxide biosynthetic process	6/572	45/18866	0.00226	0.0112	0.00812	ITGB2, AIF1, CLEC7A, TLR4, ICAM1, PTX3	6	geneontology_Biological_Process	0.0104895	Up
GO:1904646	cellular response to amyloid-beta	6/572	45/18866	0.00226	0.0112	0.00812	CASP4, LGMN, FCGR2B, TLR4, ICAM1, TREM2	6	geneontology_Biological_Process	0.0104895	Up
GO:0014015	positive regulation of gliogenesis	8/572	77/18866	0.00228	0.0113	0.00819	TNFRSF1B, CSF1, TLR2, CCL3, CCR2, LYN, IL6, TREM2	8	geneontology_Biological_Process	0.013986	Up
GO:0050714	positive regulation of protein secretion	13/572	172/18866	0.0023	0.0114	0.00826	HLA-E, CD33, SYK, CD14, FGR, TLR2, CD38, HLA-DRB1, CRTAM, CLEC4E, TLR4, IL6, TREM2	13	geneontology_Biological_Process	0.0227273	Up
GO:0002793	positive regulation of peptide secretion	14/572	193/18866	0.00233	0.0115	0.00834	HLA-E, CD33, SYK, CD14, FGR, TLR2, CD38, HLA-DRB1, CRTAM, CLEC4E, TLR4, S100A8, IL6, TREM2	14	geneontology_Biological_Process	0.0244755	Up
GO:0030041	actin filament polymerization	14/572	193/18866	0.00233	0.0115	0.00834	WAS, GMFG, HCK, CORO1A, AIF1, PSTPIP1, HCLS1, NCKAP1L, PYCARD, CCR7, CDC42EP2, ICAM1, CCL26, GAS7	14	geneontology_Biological_Process	0.0244755	Up
GO:1903169	regulation of calcium ion transmembrane transport	12/572	152/18866	0.00233	0.0115	0.00834	PTPN6, CORO1A, CYBA, XCL1, LYN, P2RY6, STAC3, CXCL9, CXCL10, CXCL11, RAMP3, APLNR	12	geneontology_Biological_Process	0.020979	Up
GO:0045638	negative regulation of myeloid cell differentiation	9/572	95/18866	0.00236	0.0116	0.00843	LILRB4, INPP5D, LILRB1, C1QC, LILRB3, CCL3, LYN, GPR171, TLR4	9	geneontology_Biological_Process	0.0157343	Up
GO:0043281	regulation of cysteine-type endopeptidase activity involved in apoptotic process	15/572	215/18866	0.00242	0.0119	0.00862	LGALS9, SYK, CARD9, LCK, NLRP3, CASP1, CLEC7A, CD27, FASLG, PYCARD, S100A9, TNFSF10, S100A8, PLAUR, MMP9	15	geneontology_Biological_Process	0.0262238	Up
GO:0031641	regulation of myelination	6/572	46/18866	0.00253	0.0124	0.009	TNFRSF1B, TYMP, CTSC, CST7, ITGAX, S100B	6	geneontology_Biological_Process	0.0104895	Up
GO:1904407	positive regulation of nitric oxide metabolic process	6/572	46/18866	0.00253	0.0124	0.009	ITGB2, AIF1, CLEC7A, TLR4, ICAM1, PTX3	6	geneontology_Biological_Process	0.0104895	Up
GO:0050482	arachidonic acid secretion	5/572	32/18866	0.00257	0.0126	0.00913	SYK, PLA2G2D, PLA2G2A, ANXA1, PLA2G5	5	geneontology_Biological_Process	0.00874126	Up
GO:1903963	arachidonate transport	5/572	32/18866	0.00257	0.0126	0.00913	SYK, PLA2G2D, PLA2G2A, ANXA1, PLA2G5	5	geneontology_Biological_Process	0.00874126	Up
GO:0001894	tissue homeostasis	17/572	261/18866	0.00266	0.013	0.00941	SASH3, CORO1A, INPP5D, SYK, CSF1R, CSF1, RAC2, CD38, CCR2, JCHAIN, LYZ, TLR4, IL6, IL20RB, TMEM119, RCN3, ACP5	17	geneontology_Biological_Process	0.0297203	Up
GO:0043254	regulation of protein-containing complex assembly	25/572	449/18866	0.00273	0.0133	0.00966	TMC8, WAS, GMFG, HCK, CORO1A, SYK, HCLS1, SKAP1, CLEC7A, NCKAP1L, PYCARD, LCP1, CCR7, PLEK, GBP5, CXCL13, WARS1, TLR4, CDC42EP2, DKK1, ICAM1, APOE, TPPP3, CCL26, WNT10B	25	geneontology_Biological_Process	0.0437063	Up
GO:0042063	gliogenesis	19/572	307/18866	0.00273	0.0133	0.00966	CSF1R, C1QA, TNFRSF1B, CSF1, TLR2, NRROS, CCL3, CCR2, LYN, S100A9, CCL2, TLR4, S100A8, C5AR1, ANXA1, IL6, S100B, MXRA8, TREM2	19	geneontology_Biological_Process	0.0332168	Up
GO:0002902	regulation of B cell apoptotic process	4/572	20/18866	0.00275	0.0133	0.00967	BTK, CD74, HSH2D, LYN	4	geneontology_Biological_Process	0.00699301	Up
GO:0032727	positive regulation of interferon-alpha production	4/572	20/18866	0.00275	0.0133	0.00967	TLR8, IRF5, TLR7, TLR4	4	geneontology_Biological_Process	0.00699301	Up
GO:0032816	positive regulation of natural killer cell activation	4/572	20/18866	0.00275	0.0133	0.00967	IL18, HLA-E, TYROBP, HLA-F	4	geneontology_Biological_Process	0.00699301	Up
GO:0042089	cytokine biosynthetic process	4/572	20/18866	0.00275	0.0133	0.00967	IL18, SYK, CD28, FOXP3	4	geneontology_Biological_Process	0.00699301	Up
GO:0071636	positive regulation of transforming growth factor beta production	4/572	20/18866	0.00275	0.0133	0.00967	LGALS9, XCL1, FOXP3, LUM	4	geneontology_Biological_Process	0.00699301	Up
GO:0002676	regulation of chronic inflammatory response	3/572	10/18866	0.00284	0.0136	0.00991	CCL5, FOXP3, IDO1	3	geneontology_Biological_Process	0.00524476	Up
GO:0032815	negative regulation of natural killer cell activation	3/572	10/18866	0.00284	0.0136	0.00991	HAVCR2, FGR, HLA-F	3	geneontology_Biological_Process	0.00524476	Up
GO:0034447	very-low-density lipoprotein particle clearance	3/572	10/18866	0.00284	0.0136	0.00991	APOBR, APOC1, APOE	3	geneontology_Biological_Process	0.00524476	Up
GO:0045625	regulation of T-helper 1 cell differentiation	3/572	10/18866	0.00284	0.0136	0.00991	JAK3, CCL19, ANXA1	3	geneontology_Biological_Process	0.00524476	Up
GO:0097278	complement-dependent cytotoxicity	3/572	10/18866	0.00284	0.0136	0.00991	C3, CD55, CFH	3	geneontology_Biological_Process	0.00524476	Up
GO:0048010	vascular endothelial growth factor receptor signaling pathway	9/572	98/18866	0.00292	0.014	0.0102	NCF1, VAV1, NCF4, CYBA, CYBB, NCKAP1L, NCF2, SH2D2A, VEGFD	9	geneontology_Biological_Process	0.0157343	Up
GO:0002691	regulation of cellular extravasation	5/572	33/18866	0.00296	0.0142	0.0103	RIPK3, PTAFR, CCR2, ICAM1, CXCL12	5	geneontology_Biological_Process	0.00874126	Up
GO:0032273	positive regulation of protein polymerization	11/572	137/18866	0.00306	0.0147	0.0107	WAS, GMFG, HCK, CORO1A, NCKAP1L, PYCARD, CCR7, CDC42EP2, ICAM1, TPPP3, CCL26	11	geneontology_Biological_Process	0.0192308	Up
GO:0048771	tissue remodeling	13/572	178/18866	0.0031	0.0148	0.0108	IL18, INPP5D, SYK, CSF1R, RAC2, CD38, CCR2, CST3, ACVRL1, IL6, TMEM119, ACP5, MMP2	13	geneontology_Biological_Process	0.0227273	Up
GO:2000377	regulation of reactive oxygen species metabolic process	14/572	200/18866	0.00322	0.0154	0.0112	RIPK3, CYBA, ITGB2, AIF1, SYK, ITGAM, ALOX5, TYROBP, RAC2, CLEC7A, TLR4, ICAM1, PTX3, ACP5	14	geneontology_Biological_Process	0.0244755	Up
GO:0030502	negative regulation of bone mineralization	4/572	21/18866	0.00332	0.0158	0.0114	CCR1, SRGN, CCL3, ECM1	4	geneontology_Biological_Process	0.00699301	Up
GO:0042107	cytokine metabolic process	4/572	21/18866	0.00332	0.0158	0.0114	IL18, SYK, CD28, FOXP3	4	geneontology_Biological_Process	0.00699301	Up
GO:0043371	negative regulation of CD4-positive, alpha-beta T cell differentiation	4/572	21/18866	0.00332	0.0158	0.0114	TBX21, FOXP3, JAK3, ANXA1	4	geneontology_Biological_Process	0.00699301	Up
GO:0048305	immunoglobulin secretion	4/572	21/18866	0.00332	0.0158	0.0114	HLA-E, TNFSF13B, CD40, IL6	4	geneontology_Biological_Process	0.00699301	Up
GO:0090280	positive regulation of calcium ion import	4/572	21/18866	0.00332	0.0158	0.0114	CCL3, CCL2, RAMP3, CXCL12	4	geneontology_Biological_Process	0.00699301	Up
GO:0045807	positive regulation of endocytosis	9/572	100/18866	0.00335	0.0159	0.0115	SYK, CD14, NCKAP1L, C3, DAB2, CCL19, APOE, TREM2, SERPINE1	9	geneontology_Biological_Process	0.0157343	Up
GO:0010922	positive regulation of phosphatase activity	5/572	34/18866	0.00338	0.016	0.0116	RIPK3, CD33, CD300A, PTPRC, PLEK	5	geneontology_Biological_Process	0.00874126	Up
GO:0030851	granulocyte differentiation	5/572	34/18866	0.00338	0.016	0.0116	INPP5D, SPI1, HCLS1, EVI2B, C1QC	5	geneontology_Biological_Process	0.00874126	Up
GO:0050715	positive regulation of cytokine secretion	5/572	34/18866	0.00338	0.016	0.0116	SYK, CD14, FGR, CRTAM, CLEC4E	5	geneontology_Biological_Process	0.00874126	Up
GO:0051482	positive regulation of cytosolic calcium ion concentration involved in phospholipase C-activating G protein-coupled signaling pathway	5/572	34/18866	0.00338	0.016	0.0116	GNA15, GPR65, C3AR1, P2RY8, P2RY10	5	geneontology_Biological_Process	0.00874126	Up
GO:0070997	neuron death	21/572	360/18866	0.00339	0.016	0.0116	CORO1A, ITGB2, ITGAM, TYROBP, C1QA, TNFRSF1B, CSF1, CD200R1, CCL5, FASLG, CCL3, CTSZ, LGMN, FCGR2B, HLA-F, CCL2, TLR4, C5AR1, DKK1, APOE, HMOX1	21	geneontology_Biological_Process	0.0367133	Up
GO:0016485	protein processing	15/572	223/18866	0.00342	0.0161	0.0117	CTSS, CASP1, VSIR, CST7, SRGN, PYCARD, CTSZ, LGMN, C1R, CLEC3B, PLAU, ADAMTS2, CTSG, SERPINE1, CPA3	15	geneontology_Biological_Process	0.0262238	Up
GO:0002686	negative regulation of leukocyte migration	6/572	49/18866	0.0035	0.0165	0.0119	CD300A, CD200R1, SLAMF8, CCL2, HMOX1, CXCL12	6	geneontology_Biological_Process	0.0104895	Up
GO:0007015	actin filament organization	24/572	434/18866	0.00358	0.0168	0.0122	MYO1F, WAS, GMFG, HCK, CORO1A, AIF1, PSTPIP1, GPR65, HCLS1, MYO1G, MYO7A, RHOH, RAC2, NCKAP1L, PYCARD, LCP1, CCR7, PLEK, CDC42EP2, ICAM1, S100A10, CXCL12, CCL26, GAS7	24	geneontology_Biological_Process	0.041958	Up
GO:0048708	astrocyte differentiation	8/572	83/18866	0.00365	0.0171	0.0124	C1QA, S100A9, TLR4, S100A8, C5AR1, IL6, S100B, TREM2	8	geneontology_Biological_Process	0.013986	Up
GO:0032715	negative regulation of interleukin-6 production	7/572	66/18866	0.00376	0.0177	0.0128	PTPN6, HAVCR2, CD200R1, SLAMF1, NCKAP1L, FOXP3, TLR4	7	geneontology_Biological_Process	0.0122378	Up
GO:0001820	serotonin secretion	3/572	11/18866	0.00381	0.0177	0.0129	LILRB1, SYK, FCER1G	3	geneontology_Biological_Process	0.00524476	Up
GO:0019371	cyclooxygenase pathway	3/572	11/18866	0.00381	0.0177	0.0129	TBXAS1, HPGDS, PTGES	3	geneontology_Biological_Process	0.00524476	Up
GO:0032908	regulation of transforming growth factor beta1 production	3/572	11/18866	0.00381	0.0177	0.0129	TYROBP, FOXP3, LUM	3	geneontology_Biological_Process	0.00524476	Up
GO:0046642	negative regulation of alpha-beta T cell proliferation	3/572	11/18866	0.00381	0.0177	0.0129	LGALS9, VSIR, XCL1	3	geneontology_Biological_Process	0.00524476	Up
GO:0051132	NK T cell activation	3/572	11/18866	0.00381	0.0177	0.0129	IL18, RASAL3, CD300A	3	geneontology_Biological_Process	0.00524476	Up
GO:0051712	positive regulation of killing of cells of other organism	3/572	11/18866	0.00381	0.0177	0.0129	SYK, PRF1, CLEC7A	3	geneontology_Biological_Process	0.00524476	Up
GO:1903980	positive regulation of microglial cell activation	3/572	11/18866	0.00381	0.0177	0.0129	CTSC, CCL3, TREM2	3	geneontology_Biological_Process	0.00524476	Up
GO:0006958	complement activation, classical pathway	11/572	141/18866	0.00382	0.0178	0.0129	C1QA, C1QC, C1QB, CR1, C3, SERPING1, C2, C1S, C1R, IGLL5, CD55	11	geneontology_Biological_Process	0.0192308	Up
GO:0001961	positive regulation of cytokine-mediated signaling pathway	6/572	50/18866	0.00388	0.0179	0.013	CASP4, CSF1, CASP1, CD74, CD300LF, TREM2	6	geneontology_Biological_Process	0.0104895	Up
GO:0030195	negative regulation of blood coagulation	6/572	50/18866	0.00388	0.0179	0.013	SERPING1, PLAU, APOE, TFPI, PLAUR, SERPINE1	6	geneontology_Biological_Process	0.0104895	Up
GO:0046850	regulation of bone remodeling	6/572	50/18866	0.00388	0.0179	0.013	INPP5D, SYK, CSF1R, CD38, IL6, TMEM119	6	geneontology_Biological_Process	0.0104895	Up
GO:0001959	regulation of cytokine-mediated signaling pathway	13/572	183/18866	0.00393	0.0182	0.0132	PTPN6, SYK, CASP4, PTPRC, CSF1, CASP1, CD74, CCL5, PYCARD, CD300LF, IL6, TREM2, ECM1	13	geneontology_Biological_Process	0.0227273	Up
GO:0046209	nitric oxide metabolic process	8/572	84/18866	0.00393	0.0182	0.0132	ITGB2, AIF1, CLEC7A, TLR2, TLR4, ICAM1, PTX3, ACP5	8	geneontology_Biological_Process	0.013986	Up
GO:0032700	negative regulation of interleukin-17 production	4/572	22/18866	0.00396	0.0182	0.0132	VSIR, NCKAP1L, FOXP3, TLR4	4	geneontology_Biological_Process	0.00699301	Up
GO:0033005	positive regulation of mast cell activation	4/572	22/18866	0.00396	0.0182	0.0132	VAMP8, SYK, FCER1G, FGR	4	geneontology_Biological_Process	0.00699301	Up
GO:0050765	negative regulation of phagocytosis	4/572	22/18866	0.00396	0.0182	0.0132	CD300A, TLR2, CD300LF, FCGR2B	4	geneontology_Biological_Process	0.00699301	Up
GO:2000316	regulation of T-helper 17 type immune response	4/572	22/18866	0.00396	0.0182	0.0132	IL12RB1, NLRP3, TBX21, FOXP3	4	geneontology_Biological_Process	0.00699301	Up
GO:0050918	positive chemotaxis	7/572	67/18866	0.0041	0.0188	0.0136	CORO1A, IL16, CCL5, CCL3, CXCL10, CXCL12, VEGFD	7	geneontology_Biological_Process	0.0122378	Up
GO:0046328	regulation of JNK cascade	13/572	184/18866	0.00411	0.0189	0.0137	NCF1, FGD2, SYK, CARD9, MAP4K1, SLAMF1, CD27, PYCARD, CCR7, FCGR2B, TLR4, CCL19, DKK1	13	geneontology_Biological_Process	0.0227273	Up
GO:0002204	somatic recombination of immunoglobulin genes involved in immune response	6/572	51/18866	0.00428	0.0195	0.0142	BATF, PTPRC, TBX21, CD28, CD40, FOXP3	6	geneontology_Biological_Process	0.0104895	Up
GO:0002208	somatic diversification of immunoglobulins involved in immune response	6/572	51/18866	0.00428	0.0195	0.0142	BATF, PTPRC, TBX21, CD28, CD40, FOXP3	6	geneontology_Biological_Process	0.0104895	Up
GO:0045190	isotype switching	6/572	51/18866	0.00428	0.0195	0.0142	BATF, PTPRC, TBX21, CD28, CD40, FOXP3	6	geneontology_Biological_Process	0.0104895	Up
GO:0071827	plasma lipoprotein particle organization	6/572	51/18866	0.00428	0.0195	0.0142	CETP, PLTP, PLA2G2A, APOC1, APOE, PLA2G5	6	geneontology_Biological_Process	0.0104895	Up
GO:1900047	negative regulation of hemostasis	6/572	51/18866	0.00428	0.0195	0.0142	SERPING1, PLAU, APOE, TFPI, PLAUR, SERPINE1	6	geneontology_Biological_Process	0.0104895	Up
GO:0045742	positive regulation of epidermal growth factor receptor signaling pathway	5/572	36/18866	0.00436	0.0199	0.0144	NCF1, FASLG, PDE6G, PLAUR, MMP9	5	geneontology_Biological_Process	0.00874126	Up
GO:0045428	regulation of nitric oxide biosynthetic process	7/572	68/18866	0.00445	0.0202	0.0147	ITGB2, AIF1, CLEC7A, TLR4, ICAM1, PTX3, ACP5	7	geneontology_Biological_Process	0.0122378	Up
GO:0034109	homotypic cell-cell adhesion	8/572	86/18866	0.00454	0.0206	0.015	PTPN6, FERMT3, SYK, CCL5, LYN, PLEK, PLAUR, PDPN	8	geneontology_Biological_Process	0.013986	Up
GO:0007160	cell-matrix adhesion	15/572	230/18866	0.00455	0.0207	0.015	FERMT3, PARVG, ITGB2, SKAP1, SIGLEC1, ITGAL, CD3E, CD96, CSF1, CCR7, ACVRL1, PLAU, S100A10, LYVE1, SERPINE1	15	geneontology_Biological_Process	0.0262238	Up
GO:1902905	positive regulation of supramolecular fiber organization	14/572	208/18866	0.00457	0.0207	0.015	WAS, GMFG, HCK, CORO1A, GPR65, NCKAP1L, PYCARD, CCR7, PLEK, CDC42EP2, ICAM1, APOE, S100A10, CCL26	14	geneontology_Biological_Process	0.0244755	Up
GO:0007265	Ras protein signal transduction	20/572	346/18866	0.00463	0.0209	0.0152	VAV1, WAS, RASAL3, CYTH4, RASGRP4, AIF1, DOK2, GPR65, ARHGAP4, DOK3, CSF1, P2RY8, RHOH, RAC2, FBP1, LYN, P2RY10, CDC42EP2, APOE, PDPN	20	geneontology_Biological_Process	0.034965	Up
GO:0031532	actin cytoskeleton reorganization	9/572	105/18866	0.00463	0.0209	0.0152	GMFG, HCK, PARVG, TRPM2, GPR65, HCLS1, CSF1R, PLEK, ANXA1	9	geneontology_Biological_Process	0.0157343	Up
GO:0097006	regulation of plasma lipoprotein particle levels	9/572	105/18866	0.00463	0.0209	0.0152	APOBR, MSR1, CETP, PLTP, PLA2G2A, APOC1, APOE, HMOX1, PLA2G5	9	geneontology_Biological_Process	0.0157343	Up
GO:0031639	plasminogen activation	4/572	23/18866	0.00468	0.0211	0.0153	CTSZ, CLEC3B, PLAU, SERPINE1	4	geneontology_Biological_Process	0.00699301	Up
GO:0035458	cellular response to interferon-beta	4/572	23/18866	0.00468	0.0211	0.0153	PYHIN1, MNDA, IRF1, AIM2	4	geneontology_Biological_Process	0.00699301	Up
GO:1901342	regulation of vasculature development	24/572	444/18866	0.00475	0.0214	0.0155	ITGB2, CYBB, ALOX5, STAB1, C3AR1, FASLG, CCR2, C3, CD40, CXCL10, CXCL13, WARS1, ITGAX, ACVRL1, C5AR1, ANXA1, IL6, HMOX1, DCN, APLNR, SERPINE1, SRPX2, ECM1, VEGFD	24	geneontology_Biological_Process	0.041958	Up
GO:2001057	reactive nitrogen species metabolic process	8/572	87/18866	0.00487	0.0219	0.0159	ITGB2, AIF1, CLEC7A, TLR2, TLR4, ICAM1, PTX3, ACP5	8	geneontology_Biological_Process	0.013986	Up
GO:0006882	cellular zinc ion homeostasis	5/572	37/18866	0.00492	0.022	0.016	LCK, S100A9, S100A8, MT1F, MT2A	5	geneontology_Biological_Process	0.00874126	Up
GO:0045191	regulation of isotype switching	5/572	37/18866	0.00492	0.022	0.016	PTPRC, TBX21, CD28, CD40, FOXP3	5	geneontology_Biological_Process	0.00874126	Up
GO:0001821	histamine secretion	3/572	12/18866	0.00497	0.022	0.016	VAMP8, BTK, LYN	3	geneontology_Biological_Process	0.00524476	Up
GO:0002002	regulation of angiotensin levels in blood	3/572	12/18866	0.00497	0.022	0.016	CTSZ, CTSG, CPA3	3	geneontology_Biological_Process	0.00524476	Up
GO:0002003	angiotensin maturation	3/572	12/18866	0.00497	0.022	0.016	CTSZ, CTSG, CPA3	3	geneontology_Biological_Process	0.00524476	Up
GO:0002551	mast cell chemotaxis	3/572	12/18866	0.00497	0.022	0.016	RAC2, PIK3CD, VEGFD	3	geneontology_Biological_Process	0.00524476	Up
GO:0006002	fructose 6-phosphate metabolic process	3/572	12/18866	0.00497	0.022	0.016	HK3, FBP1, GFPT2	3	geneontology_Biological_Process	0.00524476	Up
GO:0006069	ethanol oxidation	3/572	12/18866	0.00497	0.022	0.016	ADH1B, ADH1C, ALDH1A1	3	geneontology_Biological_Process	0.00524476	Up
GO:0010755	regulation of plasminogen activation	3/572	12/18866	0.00497	0.022	0.016	CTSZ, CLEC3B, SERPINE1	3	geneontology_Biological_Process	0.00524476	Up
GO:0032490	detection of molecule of bacterial origin	3/572	12/18866	0.00497	0.022	0.016	TLR2, TLR4, TREM2	3	geneontology_Biological_Process	0.00524476	Up
GO:0032736	positive regulation of interleukin-13 production	3/572	12/18866	0.00497	0.022	0.016	HLA-E, LGALS9, NLRP3	3	geneontology_Biological_Process	0.00524476	Up
GO:0042492	gamma-delta T cell differentiation	3/572	12/18866	0.00497	0.022	0.016	SYK, PTPRC, NCKAP1L	3	geneontology_Biological_Process	0.00524476	Up
GO:0061517	macrophage proliferation	3/572	12/18866	0.00497	0.022	0.016	CSF1R, CSF1, TREM2	3	geneontology_Biological_Process	0.00524476	Up
GO:0071639	positive regulation of monocyte chemotactic protein-1 production	3/572	12/18866	0.00497	0.022	0.016	LGALS9, SYK, CLEC7A	3	geneontology_Biological_Process	0.00524476	Up
GO:1903426	regulation of reactive oxygen species biosynthetic process	9/572	107/18866	0.00524	0.0232	0.0168	CYBA, ITGB2, AIF1, ALOX5, CLEC7A, TLR4, ICAM1, PTX3, ACP5	9	geneontology_Biological_Process	0.0157343	Up
GO:0008064	regulation of actin polymerization or depolymerization	13/572	190/18866	0.00538	0.0238	0.0172	WAS, GMFG, HCK, CORO1A, HCLS1, NCKAP1L, PYCARD, CCR7, PLEK, CDC42EP2, ICAM1, CXCL12, CCL26	13	geneontology_Biological_Process	0.0227273	Up
GO:1901186	positive regulation of ERBB signaling pathway	5/572	38/18866	0.00553	0.0244	0.0177	NCF1, FASLG, PDE6G, PLAUR, MMP9	5	geneontology_Biological_Process	0.00874126	Up
GO:1904018	positive regulation of vasculature development	15/572	235/18866	0.00554	0.0244	0.0177	ITGB2, CYBB, C3AR1, C3, CD40, ITGAX, ACVRL1, C5AR1, ANXA1, HMOX1, APLNR, SERPINE1, SRPX2, ECM1, VEGFD	15	geneontology_Biological_Process	0.0262238	Up
GO:0030832	regulation of actin filament length	13/572	191/18866	0.00562	0.0247	0.0179	WAS, GMFG, HCK, CORO1A, HCLS1, NCKAP1L, PYCARD, CCR7, PLEK, CDC42EP2, ICAM1, CXCL12, CCL26	13	geneontology_Biological_Process	0.0227273	Up
GO:1903409	reactive oxygen species biosynthetic process	10/572	128/18866	0.00563	0.0248	0.018	CYBA, ITGB2, AIF1, CYBB, ALOX5, CLEC7A, TLR4, ICAM1, PTX3, ACP5	10	geneontology_Biological_Process	0.0174825	Up
GO:0046579	positive regulation of Ras protein signal transduction	7/572	71/18866	0.00565	0.0248	0.018	VAV1, RASGRP4, GPR65, CSF1, P2RY8, LYN, P2RY10	7	geneontology_Biological_Process	0.0122378	Up
GO:2000249	regulation of actin cytoskeleton reorganization	5/572	39/18866	0.00619	0.0271	0.0197	GMFG, HCK, TRPM2, HCLS1, CSF1R	5	geneontology_Biological_Process	0.00874126	Up
GO:0071825	protein-lipid complex subunit organization	6/572	55/18866	0.00623	0.0273	0.0198	CETP, PLTP, PLA2G2A, APOC1, APOE, PLA2G5	6	geneontology_Biological_Process	0.0104895	Up
GO:0002674	negative regulation of acute inflammatory response	3/572	13/18866	0.00632	0.0275	0.0199	NLRP3, FCGR2B, IL20RB	3	geneontology_Biological_Process	0.00524476	Up
GO:0002679	respiratory burst involved in defense response	3/572	13/18866	0.00632	0.0275	0.0199	HCK, SLAMF8, PIK3CD	3	geneontology_Biological_Process	0.00524476	Up
GO:0016322	neuron remodeling	3/572	13/18866	0.00632	0.0275	0.0199	C1QA, C3, NTN4	3	geneontology_Biological_Process	0.00524476	Up
GO:0060100	positive regulation of phagocytosis, engulfment	3/572	13/18866	0.00632	0.0275	0.0199	NCKAP1L, C3, TREM2	3	geneontology_Biological_Process	0.00524476	Up
GO:0097531	mast cell migration	3/572	13/18866	0.00632	0.0275	0.0199	RAC2, PIK3CD, VEGFD	3	geneontology_Biological_Process	0.00524476	Up
GO:1903236	regulation of leukocyte tethering or rolling	3/572	13/18866	0.00632	0.0275	0.0199	PTAFR, CCR2, CXCL12	3	geneontology_Biological_Process	0.00524476	Up
GO:1905155	positive regulation of membrane invagination	3/572	13/18866	0.00632	0.0275	0.0199	NCKAP1L, C3, TREM2	3	geneontology_Biological_Process	0.00524476	Up
GO:0045662	negative regulation of myoblast differentiation	4/572	25/18866	0.00637	0.0276	0.02	IL18, CXCL10, CCL17, CXCL14	4	geneontology_Biological_Process	0.00699301	Up
GO:0046639	negative regulation of alpha-beta T cell differentiation	4/572	25/18866	0.00637	0.0276	0.02	TBX21, FOXP3, JAK3, ANXA1	4	geneontology_Biological_Process	0.00699301	Up
GO:0034103	regulation of tissue remodeling	8/572	91/18866	0.00638	0.0276	0.02	IL18, INPP5D, SYK, CSF1R, CD38, CST3, IL6, TMEM119	8	geneontology_Biological_Process	0.013986	Up
GO:0045921	positive regulation of exocytosis	8/572	91/18866	0.00638	0.0276	0.02	VAMP8, PTAFR, ITGB2, SYK, ITGAM, FCER1G, FGR, HLA-F	8	geneontology_Biological_Process	0.013986	Up
GO:0046849	bone remodeling	8/572	91/18866	0.00638	0.0276	0.02	INPP5D, SYK, CSF1R, RAC2, CD38, IL6, TMEM119, ACP5	8	geneontology_Biological_Process	0.013986	Up
GO:0070302	regulation of stress-activated protein kinase signaling cascade	15/572	240/18866	0.00669	0.0289	0.021	NCF1, FGD2, SCIMP, SYK, CARD9, MAP4K1, SLAMF1, CD27, PYCARD, LYN, CCR7, FCGR2B, TLR4, CCL19, DKK1	15	geneontology_Biological_Process	0.0262238	Up
GO:0034599	cellular response to oxidative stress	18/572	310/18866	0.0067	0.0289	0.021	RIPK3, NCF1, NCF4, BTK, CYBA, AIF1, TRPM2, CYBB, ALOX5, VNN1, NCF2, TLR4, CST3, ANXA1, IL6, HMOX1, MMP2, MMP9	18	geneontology_Biological_Process	0.0314685	Up
GO:0016447	somatic recombination of immunoglobulin gene segments	6/572	56/18866	0.0068	0.0293	0.0213	BATF, PTPRC, TBX21, CD28, CD40, FOXP3	6	geneontology_Biological_Process	0.0104895	Up
GO:0032956	regulation of actin cytoskeleton organization	20/572	360/18866	0.0071	0.0305	0.0222	WAS, GMFG, HCK, CORO1A, TRPM2, GPR65, HCLS1, CSF1R, RHOH, RAC2, NCKAP1L, PYCARD, CCR7, PLEK, CDC42EP2, ICAM1, BST2, S100A10, CXCL12, CCL26	20	geneontology_Biological_Process	0.034965	Up
GO:1903035	negative regulation of response to wounding	8/572	93/18866	0.00726	0.0312	0.0226	ALOX5, SERPING1, SIGLEC10, PLAU, APOE, TFPI, PLAUR, SERPINE1	8	geneontology_Biological_Process	0.013986	Up
GO:0001783	B cell apoptotic process	4/572	26/18866	0.00736	0.0314	0.0228	BTK, CD74, HSH2D, LYN	4	geneontology_Biological_Process	0.00699301	Up
GO:0003081	regulation of systemic arterial blood pressure by renin-angiotensin	4/572	26/18866	0.00736	0.0314	0.0228	CYBA, CTSZ, CTSG, CPA3	4	geneontology_Biological_Process	0.00699301	Up
GO:0031579	membrane raft organization	4/572	26/18866	0.00736	0.0314	0.0228	DOCK2, CD2, PTPRC, S100A10	4	geneontology_Biological_Process	0.00699301	Up
GO:0031664	regulation of lipopolysaccharide-mediated signaling pathway	4/572	26/18866	0.00736	0.0314	0.0228	SCIMP, LY86, CD180, CD55	4	geneontology_Biological_Process	0.00699301	Up
GO:0036152	phosphatidylethanolamine acyl-chain remodeling	4/572	26/18866	0.00736	0.0314	0.0228	PLA2G2D, PLA2G2A, PLAAT4, PLA2G5	4	geneontology_Biological_Process	0.00699301	Up
GO:0042730	fibrinolysis	4/572	26/18866	0.00736	0.0314	0.0228	SERPING1, PLAU, PLAUR, SERPINE1	4	geneontology_Biological_Process	0.00699301	Up
GO:0001938	positive regulation of endothelial cell proliferation	9/572	113/18866	0.00745	0.0318	0.0231	CYBA, ACVRL1, HMOX1, CXCL12, CCL26, WNT2, APLNR, ECM1, VEGFD	9	geneontology_Biological_Process	0.0157343	Up
GO:0050832	defense response to fungus	5/572	41/18866	0.00766	0.0326	0.0237	S100A9, GNLY, S100A8, PLA2G5, CTSG	5	geneontology_Biological_Process	0.00874126	Up
GO:1902042	negative regulation of extrinsic apoptotic signaling pathway via death domain receptors	5/572	41/18866	0.00766	0.0326	0.0237	FASLG, TNFSF10, ICAM1, HMOX1, SERPINE1	5	geneontology_Biological_Process	0.00874126	Up
GO:1904035	regulation of epithelial cell apoptotic process	8/572	94/18866	0.00773	0.0329	0.0238	FASLG, CD40, CCL2, ICAM1, IL6, HMOX1, CD248, SERPINE1	8	geneontology_Biological_Process	0.013986	Up
GO:0002475	antigen processing and presentation via MHC class Ib	3/572	14/18866	0.00786	0.0332	0.0241	HLA-E, HLA-F, CD1C	3	geneontology_Biological_Process	0.00524476	Up
GO:0002829	negative regulation of type 2 immune response	3/572	14/18866	0.00786	0.0332	0.0241	TBX21, CCR2, ANXA1	3	geneontology_Biological_Process	0.00524476	Up
GO:0010935	regulation of macrophage cytokine production	3/572	14/18866	0.00786	0.0332	0.0241	LILRB1, CD74, TLR4	3	geneontology_Biological_Process	0.00524476	Up
GO:0043922	negative regulation by host of viral transcription	3/572	14/18866	0.00786	0.0332	0.0241	CCL4, CCL5, CCL3	3	geneontology_Biological_Process	0.00524476	Up
GO:0050930	induction of positive chemotaxis	3/572	14/18866	0.00786	0.0332	0.0241	IL16, CXCL12, VEGFD	3	geneontology_Biological_Process	0.00524476	Up
GO:0051709	regulation of killing of cells of other organism	3/572	14/18866	0.00786	0.0332	0.0241	SYK, PRF1, CLEC7A	3	geneontology_Biological_Process	0.00524476	Up
GO:0035306	positive regulation of dephosphorylation	6/572	58/18866	0.00806	0.034	0.0247	RIPK3, CD33, LILRB2, CD300A, PTPRC, PLEK	6	geneontology_Biological_Process	0.0104895	Up
GO:0043551	regulation of phosphatidylinositol 3-kinase activity	6/572	58/18866	0.00806	0.034	0.0247	PIK3R5, SLA2, FGR, LYN, CCR7, CCL19	6	geneontology_Biological_Process	0.0104895	Up
GO:2000146	negative regulation of cell motility	20/572	365/18866	0.00821	0.0346	0.0251	WAS, AIF1, ARHGAP4, CD300A, CD200R1, CD74, SLAMF8, HAS1, CXCL13, CCL2, TMIGD3, ACVRL1, IFITM1, APOE, BST2, HMOX1, PODN, DCN, CXCL12, SERPINE1	20	geneontology_Biological_Process	0.034965	Up
GO:0033081	regulation of T cell differentiation in thymus	4/572	27/18866	0.00843	0.0354	0.0257	VNN1, TESPA1, FOXP3, IL7R	4	geneontology_Biological_Process	0.00699301	Up
GO:0045672	positive regulation of osteoclast differentiation	4/572	27/18866	0.00843	0.0354	0.0257	TYROBP, CSF1, CCR1, TREM2	4	geneontology_Biological_Process	0.00699301	Up
GO:0048143	astrocyte activation	4/572	27/18866	0.00843	0.0354	0.0257	C1QA, C5AR1, IL6, TREM2	4	geneontology_Biological_Process	0.00699301	Up
GO:2000353	positive regulation of endothelial cell apoptotic process	4/572	27/18866	0.00843	0.0354	0.0257	FASLG, CD40, CCL2, CD248	4	geneontology_Biological_Process	0.00699301	Up
GO:1901658	glycosyl compound catabolic process	5/572	42/18866	0.00849	0.0355	0.0258	TYMP, ADA2, APOBEC3H, FUCA1, NT5E	5	geneontology_Biological_Process	0.00874126	Up
GO:1904037	positive regulation of epithelial cell apoptotic process	5/572	42/18866	0.00849	0.0355	0.0258	FASLG, CD40, CCL2, IL6, CD248	5	geneontology_Biological_Process	0.00874126	Up
GO:0043405	regulation of MAP kinase activity	19/572	342/18866	0.00855	0.0358	0.0259	PTPN6, PIK3R5, FGD2, SYK, MAP4K1, CD300A, PTPRC, CD74, FPR1, LYN, PDE6G, CD40, MAP3K8, TLR4, CCL19, C5AR1, DKK1, IGFBP6, APOE	19	geneontology_Biological_Process	0.0332168	Up
GO:0045454	cell redox homeostasis	6/572	59/18866	0.00875	0.0365	0.0265	NCF1, NCF4, CYBA, CYBB, RAC2, NCF2	6	geneontology_Biological_Process	0.0104895	Up
GO:0030500	regulation of bone mineralization	7/572	77/18866	0.00875	0.0365	0.0265	ALOX5, CCR1, SRGN, CCL3, WNT10B, TMEM119, ECM1	7	geneontology_Biological_Process	0.0122378	Up
GO:0030282	bone mineralization	9/572	117/18866	0.00928	0.0387	0.0281	ALOX5, FGR, CCR1, SRGN, CCL3, CLEC3B, WNT10B, TMEM119, ECM1	9	geneontology_Biological_Process	0.0157343	Up
GO:0051057	positive regulation of small GTPase mediated signal transduction	7/572	78/18866	0.00937	0.039	0.0283	VAV1, RASGRP4, GPR65, CSF1, P2RY8, LYN, P2RY10	7	geneontology_Biological_Process	0.0122378	Up
GO:0061045	negative regulation of wound healing	7/572	78/18866	0.00937	0.039	0.0283	ALOX5, SERPING1, PLAU, APOE, TFPI, PLAUR, SERPINE1	7	geneontology_Biological_Process	0.0122378	Up
GO:0010575	positive regulation of vascular endothelial growth factor production	4/572	28/18866	0.00961	0.0395	0.0287	C3AR1, C3, C5AR1, IL6	4	geneontology_Biological_Process	0.00699301	Up
GO:0030194	positive regulation of blood coagulation	4/572	28/18866	0.00961	0.0395	0.0287	PLEK, TLR4, SERPINE1, PDPN	4	geneontology_Biological_Process	0.00699301	Up
GO:0045830	positive regulation of isotype switching	4/572	28/18866	0.00961	0.0395	0.0287	PTPRC, TBX21, CD28, CD40	4	geneontology_Biological_Process	0.00699301	Up
GO:0060143	positive regulation of syncytium formation by plasma membrane fusion	4/572	28/18866	0.00961	0.0395	0.0287	CD53, TYROBP, CXCL9, TREM2	4	geneontology_Biological_Process	0.00699301	Up
GO:0090200	positive regulation of release of cytochrome c from mitochondria	4/572	28/18866	0.00961	0.0395	0.0287	PYCARD, TNFSF10, PLAUR, MMP9	4	geneontology_Biological_Process	0.00699301	Up
GO:1900048	positive regulation of hemostasis	4/572	28/18866	0.00961	0.0395	0.0287	PLEK, TLR4, SERPINE1, PDPN	4	geneontology_Biological_Process	0.00699301	Up
GO:0032645	regulation of granulocyte macrophage colony-stimulating factor production	3/572	15/18866	0.00961	0.0395	0.0287	IL18, SYK, CD84	3	geneontology_Biological_Process	0.00524476	Up
GO:0033623	regulation of integrin activation	3/572	15/18866	0.00961	0.0395	0.0287	SKAP1, PLEK, CXCL13	3	geneontology_Biological_Process	0.00524476	Up
GO:0045346	regulation of MHC class II biosynthetic process	3/572	15/18866	0.00961	0.0395	0.0287	SPI1, CIITA, TLR4	3	geneontology_Biological_Process	0.00524476	Up
GO:0051608	histamine transport	3/572	15/18866	0.00961	0.0395	0.0287	VAMP8, BTK, LYN	3	geneontology_Biological_Process	0.00524476	Up
GO:0070207	protein homotrimerization	3/572	15/18866	0.00961	0.0395	0.0287	ALOX5AP, SCARA5, STEAP4	3	geneontology_Biological_Process	0.00524476	Up
GO:0006809	nitric oxide biosynthetic process	7/572	79/18866	0.01	0.0411	0.0298	ITGB2, AIF1, CLEC7A, TLR4, ICAM1, PTX3, ACP5	7	geneontology_Biological_Process	0.0122378	Up
GO:0071260	cellular response to mechanical stimulus	7/572	79/18866	0.01	0.0411	0.0298	CYBA, TLR8, CASP1, TLR7, CD40, IRF1, TLR4	7	geneontology_Biological_Process	0.0122378	Up
GO:2001235	positive regulation of apoptotic signaling pathway	12/572	183/18866	0.0101	0.0414	0.0301	RIPK3, LGALS9, LCK, PTPRC, CTSC, PYCARD, S100A9, TNFSF10, GZMB, S100A8, PLAUR, MMP9	12	geneontology_Biological_Process	0.020979	Up
GO:0090303	positive regulation of wound healing	6/572	61/18866	0.0102	0.0419	0.0304	CLEC7A, PLEK, TLR4, ANXA1, SERPINE1, PDPN	6	geneontology_Biological_Process	0.0104895	Up
GO:1902041	regulation of extrinsic apoptotic signaling pathway via death domain receptors	6/572	61/18866	0.0102	0.0419	0.0304	TMC8, FASLG, TNFSF10, ICAM1, HMOX1, SERPINE1	6	geneontology_Biological_Process	0.0104895	Up
GO:1903902	positive regulation of viral life cycle	6/572	61/18866	0.0102	0.0419	0.0304	LGALS9, CD4, CD74, CCL5, HLA-DRB1, CD28	6	geneontology_Biological_Process	0.0104895	Up
GO:0031098	stress-activated protein kinase signaling cascade	17/572	300/18866	0.0104	0.0424	0.0307	NCF1, FGD2, LGALS9, SCIMP, SYK, CARD9, MAP4K1, SLAMF1, CD27, PYCARD, LYN, CCR7, FCGR2B, MAP3K8, TLR4, CCL19, DKK1	17	geneontology_Biological_Process	0.0297203	Up
GO:0062207	regulation of pattern recognition receptor signaling pathway	8/572	99/18866	0.0104	0.0425	0.0309	CYBA, CD14, CD300A, TLR2, LYN, CD300LF, IRF1, TLR4	8	geneontology_Biological_Process	0.013986	Up
GO:0001936	regulation of endothelial cell proliferation	12/572	184/18866	0.0105	0.0429	0.0311	CYBA, ALOX5, CCL2, ACVRL1, APOE, HMOX1, CXCL12, CCL26, WNT2, APLNR, ECM1, VEGFD	12	geneontology_Biological_Process	0.020979	Up
GO:0051495	positive regulation of cytoskeleton organization	14/572	230/18866	0.0107	0.0436	0.0316	WAS, GMFG, HCK, CORO1A, GPR65, HCLS1, NCKAP1L, PYCARD, CCR7, PLEK, CDC42EP2, ICAM1, S100A10, CCL26	14	geneontology_Biological_Process	0.0244755	Up
GO:0030336	negative regulation of cell migration	19/572	350/18866	0.0108	0.0438	0.0318	AIF1, ARHGAP4, CD300A, CD200R1, CD74, SLAMF8, HAS1, CXCL13, CCL2, TMIGD3, ACVRL1, IFITM1, APOE, BST2, HMOX1, PODN, DCN, CXCL12, SERPINE1	19	geneontology_Biological_Process	0.0332168	Up
GO:0002230	positive regulation of defense response to virus by host	4/572	29/18866	0.0109	0.0441	0.032	IL12RB1, LILRB1, PYCARD, AIM2	4	geneontology_Biological_Process	0.00699301	Up
GO:0050820	positive regulation of coagulation	4/572	29/18866	0.0109	0.0441	0.032	PLEK, TLR4, SERPINE1, PDPN	4	geneontology_Biological_Process	0.00699301	Up
GO:0050855	regulation of B cell receptor signaling pathway	4/572	29/18866	0.0109	0.0441	0.032	CD300A, NFAM1, LYN, FCGR2B	4	geneontology_Biological_Process	0.00699301	Up
GO:0031214	biomineral tissue development	11/572	163/18866	0.011	0.0446	0.0324	ALOX5, FGR, CCR1, SRGN, CCL3, FAM20A, CLEC3B, WNT10B, ALPL, TMEM119, ECM1	11	geneontology_Biological_Process	0.0192308	Up
GO:0110148	biomineralization	11/572	163/18866	0.011	0.0446	0.0324	ALOX5, FGR, CCR1, SRGN, CCL3, FAM20A, CLEC3B, WNT10B, ALPL, TMEM119, ECM1	11	geneontology_Biological_Process	0.0192308	Up
GO:0070527	platelet aggregation	6/572	62/18866	0.0111	0.0446	0.0324	PTPN6, FERMT3, SYK, LYN, PLEK, PDPN	6	geneontology_Biological_Process	0.0104895	Up
GO:2000351	regulation of endothelial cell apoptotic process	6/572	62/18866	0.0111	0.0446	0.0324	FASLG, CD40, CCL2, ICAM1, CD248, SERPINE1	6	geneontology_Biological_Process	0.0104895	Up
GO:0034122	negative regulation of toll-like receptor signaling pathway	5/572	45/18866	0.0113	0.0456	0.0331	CD14, CD300A, LYN, CD300LF, TLR4	5	geneontology_Biological_Process	0.00874126	Up
GO:0045911	positive regulation of DNA recombination	5/572	45/18866	0.0113	0.0456	0.0331	WAS, PTPRC, TBX21, CD28, CD40	5	geneontology_Biological_Process	0.00874126	Up
GO:0010919	regulation of inositol phosphate biosynthetic process	3/572	16/18866	0.0116	0.0463	0.0336	PTAFR, PLEK, P2RY6	3	geneontology_Biological_Process	0.00524476	Up
GO:0010934	macrophage cytokine production	3/572	16/18866	0.0116	0.0463	0.0336	LILRB1, CD74, TLR4	3	geneontology_Biological_Process	0.00524476	Up
GO:0032604	granulocyte macrophage colony-stimulating factor production	3/572	16/18866	0.0116	0.0463	0.0336	IL18, SYK, CD84	3	geneontology_Biological_Process	0.00524476	Up
GO:0033033	negative regulation of myeloid cell apoptotic process	3/572	16/18866	0.0116	0.0463	0.0336	FCER1G, CCR5, CCL5	3	geneontology_Biological_Process	0.00524476	Up
GO:0045342	MHC class II biosynthetic process	3/572	16/18866	0.0116	0.0463	0.0336	SPI1, CIITA, TLR4	3	geneontology_Biological_Process	0.00524476	Up
GO:0051770	positive regulation of nitric-oxide synthase biosynthetic process	3/572	16/18866	0.0116	0.0463	0.0336	TLR2, CCL2, TLR4	3	geneontology_Biological_Process	0.00524476	Up
GO:0002792	negative regulation of peptide secretion	8/572	101/18866	0.0117	0.0467	0.0339	CD74, RHBDF2, SRGN, FCGR2B, FOXP3, APOE, ANXA1, LRRC32	8	geneontology_Biological_Process	0.013986	Up
GO:0015908	fatty acid transport	8/572	101/18866	0.0117	0.0467	0.0339	SYK, ACSL5, PLA2G2D, PLA2G2A, APOE, ANXA1, PLA2G5, FABP4	8	geneontology_Biological_Process	0.013986	Up
GO:0030100	regulation of endocytosis	13/572	210/18866	0.012	0.0478	0.0347	LILRB1, SYK, CD14, CD300A, NCKAP1L, C3, DAB2, CCL19, DKK1, APOC1, APOE, TREM2, SERPINE1	13	geneontology_Biological_Process	0.0227273	Up
GO:0035666	TRIF-dependent toll-like receptor signaling pathway	4/572	30/18866	0.0123	0.0487	0.0354	CD14, CD300LF, CD40, TLR4	4	geneontology_Biological_Process	0.00699301	Up
GO:0070168	negative regulation of biomineral tissue development	4/572	30/18866	0.0123	0.0487	0.0354	CCR1, SRGN, CCL3, ECM1	4	geneontology_Biological_Process	0.00699301	Up
GO:0110150	negative regulation of biomineralization	4/572	30/18866	0.0123	0.0487	0.0354	CCR1, SRGN, CCL3, ECM1	4	geneontology_Biological_Process	0.00699301	Up
GO:0032970	regulation of actin filament-based process	21/572	405/18866	0.0123	0.049	0.0355	WAS, GMFG, HCK, CORO1A, TRPM2, GPR65, HCLS1, CSF1R, RHOH, RAC2, NCKAP1L, PYCARD, CCR7, PLEK, CDC42EP2, ICAM1, BST2, S100A10, CXCL12, CCL26, PDPN	21	geneontology_Biological_Process	0.0367133	Up
GO:0032309	icosanoid secretion	5/572	46/18866	0.0124	0.0491	0.0357	SYK, PLA2G2D, PLA2G2A, ANXA1, PLA2G5	5	geneontology_Biological_Process	0.00874126	Up
GO:0035987	endodermal cell differentiation	5/572	46/18866	0.0124	0.0491	0.0357	ITGB2, EOMES, DKK1, MMP2, MMP9	5	geneontology_Biological_Process	0.00874126	Up
GO:0050679	positive regulation of epithelial cell proliferation	13/572	211/18866	0.0124	0.0492	0.0357	JAML, CYBA, CCL5, TLR4, ACVRL1, C5AR1, HMOX1, CXCL12, CCL26, WNT2, APLNR, ECM1, VEGFD	13	geneontology_Biological_Process	0.0227273	Up
GO:0106106	cold-induced thermogenesis	10/572	144/18866	0.0125	0.0492	0.0357	IL18, SYK, UCP2, CCR2, CMKLR1, TLR4, ADAMTS5, WNT10B, ALDH1A1, FABP4	10	geneontology_Biological_Process	0.0174825	Up
GO:0120161	regulation of cold-induced thermogenesis	10/572	144/18866	0.0125	0.0492	0.0357	IL18, SYK, UCP2, CCR2, CMKLR1, TLR4, ADAMTS5, WNT10B, ALDH1A1, FABP4	10	geneontology_Biological_Process	0.0174825	Up
GO:2001242	regulation of intrinsic apoptotic signaling pathway	11/572	166/18866	0.0125	0.0495	0.0359	RIPK3, LCK, CD74, VNN1, PYCARD, S100A9, ZNF385A, S100A8, PLAUR, CXCL12, MMP9	11	geneontology_Biological_Process	0.0192308	Up
GO:0046686	response to cadmium ion	6/572	64/18866	0.0128	0.0506	0.0367	NCF1, CYBB, HMOX1, MT1F, MT2A, MMP9	6	geneontology_Biological_Process	0.0104895	Up
GO:0007254	JNK cascade	13/572	213/18866	0.0134	0.0526	0.0382	NCF1, FGD2, SYK, CARD9, MAP4K1, SLAMF1, CD27, PYCARD, CCR7, FCGR2B, TLR4, CCL19, DKK1	13	geneontology_Biological_Process	0.0227273	Up
GO:0032872	regulation of stress-activated MAPK cascade	14/572	237/18866	0.0137	0.0537	0.039	NCF1, FGD2, SCIMP, SYK, CARD9, MAP4K1, SLAMF1, CD27, PYCARD, CCR7, FCGR2B, TLR4, CCL19, DKK1	14	geneontology_Biological_Process	0.0244755	Up
GO:0010715	regulation of extracellular matrix disassembly	3/572	17/18866	0.0137	0.0538	0.0391	CST3, IL6, PDPN	3	geneontology_Biological_Process	0.00524476	Up
GO:0016045	detection of bacterium	3/572	17/18866	0.0137	0.0538	0.0391	TLR2, HLA-DRB1, HLA-B	3	geneontology_Biological_Process	0.00524476	Up
GO:0044764	multi-organism cellular process	3/572	17/18866	0.0137	0.0538	0.0391	CD4, SIGLEC1, CCR5	3	geneontology_Biological_Process	0.00524476	Up
GO:2001267	regulation of cysteine-type endopeptidase activity involved in apoptotic signaling pathway	3/572	17/18866	0.0137	0.0538	0.0391	LGALS9, PLAUR, MMP9	3	geneontology_Biological_Process	0.00524476	Up
GO:0140029	exocytic process	7/572	84/18866	0.0138	0.054	0.0392	VAMP8, BTK, SYK, FCER1G, LYN, PLEK, STXBP2	7	geneontology_Biological_Process	0.0122378	Up
GO:0051403	stress-activated MAPK cascade	16/572	286/18866	0.0142	0.0553	0.0402	NCF1, FGD2, LGALS9, SCIMP, SYK, CARD9, MAP4K1, SLAMF1, CD27, PYCARD, CCR7, FCGR2B, MAP3K8, TLR4, CCL19, DKK1	16	geneontology_Biological_Process	0.027972	Up
GO:0062197	cellular response to chemical stress	19/572	360/18866	0.0142	0.0553	0.0402	RIPK3, NCF1, NCF4, BTK, CYBA, AIF1, TRPM2, CYBB, ALOX5, VNN1, NCF2, RCSD1, TLR4, CST3, ANXA1, IL6, HMOX1, MMP2, MMP9	19	geneontology_Biological_Process	0.0332168	Up
GO:0090382	phagosome maturation	5/572	48/18866	0.0147	0.0575	0.0418	CORO1A, MYO7A, SLAMF8, RAB20, PLA2G5	5	geneontology_Biological_Process	0.00874126	Up
GO:0002562	somatic diversification of immune receptors via germline recombination within a single locus	6/572	66/18866	0.0148	0.0576	0.0418	BATF, PTPRC, TBX21, CD28, CD40, FOXP3	6	geneontology_Biological_Process	0.0104895	Up
GO:0016444	somatic cell DNA recombination	6/572	66/18866	0.0148	0.0576	0.0418	BATF, PTPRC, TBX21, CD28, CD40, FOXP3	6	geneontology_Biological_Process	0.0104895	Up
GO:0016445	somatic diversification of immunoglobulins	6/572	66/18866	0.0148	0.0576	0.0418	BATF, PTPRC, TBX21, CD28, CD40, FOXP3	6	geneontology_Biological_Process	0.0104895	Up
GO:2001233	regulation of apoptotic signaling pathway	21/572	413/18866	0.0151	0.0586	0.0425	RIPK3, TMC8, LGALS9, LCK, PTPRC, CTSC, CD74, VNN1, FASLG, PYCARD, S100A9, ZNF385A, TNFSF10, GZMB, S100A8, ICAM1, HMOX1, PLAUR, CXCL12, SERPINE1, MMP9	21	geneontology_Biological_Process	0.0367133	Up
GO:0043406	positive regulation of MAP kinase activity	15/572	264/18866	0.0151	0.0588	0.0427	PIK3R5, FGD2, SYK, MAP4K1, PTPRC, CD74, FPR1, PDE6G, CD40, MAP3K8, TLR4, CCL19, C5AR1, DKK1, IGFBP6	15	geneontology_Biological_Process	0.0262238	Up
GO:0009164	nucleoside catabolic process	4/572	32/18866	0.0153	0.0595	0.0432	TYMP, ADA2, APOBEC3H, NT5E	4	geneontology_Biological_Process	0.00699301	Up
GO:0006919	activation of cysteine-type endopeptidase activity involved in apoptotic process	7/572	86/18866	0.0155	0.0602	0.0437	LCK, NLRP3, FASLG, PYCARD, S100A9, TNFSF10, S100A8	7	geneontology_Biological_Process	0.0122378	Up
GO:0043550	regulation of lipid kinase activity	6/572	67/18866	0.0158	0.0614	0.0445	PIK3R5, SLA2, FGR, LYN, CCR7, CCL19	6	geneontology_Biological_Process	0.0104895	Up
GO:0002244	hematopoietic progenitor cell differentiation	11/572	172/18866	0.016	0.0617	0.0448	PTPN6, ARL11, BATF, RBM47, SPI1, PSMB10, CSF1R, PTPRC, PLEK, PSMB9, OSM	11	geneontology_Biological_Process	0.0192308	Up
GO:0006692	prostanoid metabolic process	5/572	49/18866	0.016	0.0617	0.0448	TBXAS1, CD74, HPGDS, PTGES, ANXA1	5	geneontology_Biological_Process	0.00874126	Up
GO:0006693	prostaglandin metabolic process	5/572	49/18866	0.016	0.0617	0.0448	TBXAS1, CD74, HPGDS, PTGES, ANXA1	5	geneontology_Biological_Process	0.00874126	Up
GO:1901136	carbohydrate derivative catabolic process	12/572	195/18866	0.0161	0.0617	0.0448	AOAH, TYMP, NPL, ADA2, APOBEC3H, FUCA1, RENBP, CST3, DCN, LYVE1, NT5E, LUM	12	geneontology_Biological_Process	0.020979	Up
GO:0010713	negative regulation of collagen metabolic process	3/572	18/18866	0.0161	0.0617	0.0448	CIITA, CST3, IL6	3	geneontology_Biological_Process	0.00524476	Up
GO:0036148	phosphatidylglycerol acyl-chain remodeling	3/572	18/18866	0.0161	0.0617	0.0448	PLA2G2D, PLA2G2A, PLA2G5	3	geneontology_Biological_Process	0.00524476	Up
GO:0036149	phosphatidylinositol acyl-chain remodeling	3/572	18/18866	0.0161	0.0617	0.0448	PLA2G2D, PLA2G2A, PLA2G5	3	geneontology_Biological_Process	0.00524476	Up
GO:0043652	engulfment of apoptotic cell	3/572	18/18866	0.0161	0.0617	0.0448	RHOH, RAC2, TREM2	3	geneontology_Biological_Process	0.00524476	Up
GO:0046597	negative regulation of viral entry into host cell	3/572	18/18866	0.0161	0.0617	0.0448	FCN1, IFITM1, PTX3	3	geneontology_Biological_Process	0.00524476	Up
GO:0051023	regulation of immunoglobulin secretion	3/572	18/18866	0.0161	0.0617	0.0448	HLA-E, CD40, IL6	3	geneontology_Biological_Process	0.00524476	Up
GO:0071605	monocyte chemotactic protein-1 production	3/572	18/18866	0.0161	0.0617	0.0448	LGALS9, SYK, CLEC7A	3	geneontology_Biological_Process	0.00524476	Up
GO:0071637	regulation of monocyte chemotactic protein-1 production	3/572	18/18866	0.0161	0.0617	0.0448	LGALS9, SYK, CLEC7A	3	geneontology_Biological_Process	0.00524476	Up
GO:0048524	positive regulation of viral process	8/572	107/18866	0.0161	0.0617	0.0448	LGALS9, CD4, CSF1R, CD74, CCL5, HLA-DRB1, CD28, APOE	8	geneontology_Biological_Process	0.013986	Up
GO:0072577	endothelial cell apoptotic process	6/572	68/18866	0.0169	0.0647	0.047	FASLG, CD40, CCL2, ICAM1, CD248, SERPINE1	6	geneontology_Biological_Process	0.0104895	Up
GO:0043552	positive regulation of phosphatidylinositol 3-kinase activity	4/572	33/18866	0.0171	0.0651	0.0472	FGR, LYN, CCR7, CCL19	4	geneontology_Biological_Process	0.00699301	Up
GO:0001659	temperature homeostasis	11/572	174/18866	0.0173	0.0657	0.0477	IL18, TRPM2, SYK, UCP2, CCR2, CMKLR1, TLR4, ADAMTS5, WNT10B, ALDH1A1, FABP4	11	geneontology_Biological_Process	0.0192308	Up
GO:0030833	regulation of actin filament polymerization	11/572	174/18866	0.0173	0.0657	0.0477	WAS, GMFG, HCK, CORO1A, HCLS1, NCKAP1L, PYCARD, CCR7, CDC42EP2, ICAM1, CCL26	11	geneontology_Biological_Process	0.0192308	Up
GO:0003044	regulation of systemic arterial blood pressure mediated by a chemical signal	5/572	50/18866	0.0174	0.0659	0.0478	CYBA, CTSZ, SLC2A5, CTSG, CPA3	5	geneontology_Biological_Process	0.00874126	Up
GO:0014009	glial cell proliferation	5/572	50/18866	0.0174	0.0659	0.0478	CSF1R, CSF1, LYN, IL6, TREM2	5	geneontology_Biological_Process	0.00874126	Up
GO:0071715	icosanoid transport	5/572	50/18866	0.0174	0.0659	0.0478	SYK, PLA2G2D, PLA2G2A, ANXA1, PLA2G5	5	geneontology_Biological_Process	0.00874126	Up
GO:1901571	fatty acid derivative transport	5/572	50/18866	0.0174	0.0659	0.0478	SYK, PLA2G2D, PLA2G2A, ANXA1, PLA2G5	5	geneontology_Biological_Process	0.00874126	Up
GO:0051604	protein maturation	16/572	293/18866	0.0174	0.066	0.0479	CTSS, CASP1, VSIR, CST7, SRGN, TSPAN33, PYCARD, CTSZ, LGMN, C1R, CLEC3B, PLAU, ADAMTS2, CTSG, SERPINE1, CPA3	16	geneontology_Biological_Process	0.027972	Up
GO:0022604	regulation of cell morphogenesis	24/572	499/18866	0.0182	0.0688	0.0499	FGD3, LST1, FGD2, HCK, CORO1A, ITGB2, ARHGAP4, FMNL1, CSF1R, FGR, RHOH, RAC2, CCL3, ARHGAP15, CCL13, CCL2, CDC42EP2, ICAM1, APOE, ANXA1, S100A10, CXCL12, S100B, PDPN	24	geneontology_Biological_Process	0.041958	Up
GO:0001935	endothelial cell proliferation	12/572	199/18866	0.0185	0.0702	0.0509	CYBA, ALOX5, CCL2, ACVRL1, APOE, HMOX1, CXCL12, CCL26, WNT2, APLNR, ECM1, VEGFD	12	geneontology_Biological_Process	0.020979	Up
GO:0001991	regulation of systemic arterial blood pressure by circulatory renin-angiotensin	3/572	19/18866	0.0187	0.0703	0.051	CTSZ, CTSG, CPA3	3	geneontology_Biological_Process	0.00524476	Up
GO:0002862	negative regulation of inflammatory response to antigenic stimulus	3/572	19/18866	0.0187	0.0703	0.051	HLA-DRB1, FCGR2B, IL20RB	3	geneontology_Biological_Process	0.00524476	Up
GO:0003159	morphogenesis of an endothelium	3/572	19/18866	0.0187	0.0703	0.051	CXCL10, ITGAX, ACVRL1	3	geneontology_Biological_Process	0.00524476	Up
GO:0030050	vesicle transport along actin filament	3/572	19/18866	0.0187	0.0703	0.051	MYO1F, MYO1G, MYO7A	3	geneontology_Biological_Process	0.00524476	Up
GO:0061154	endothelial tube morphogenesis	3/572	19/18866	0.0187	0.0703	0.051	CXCL10, ITGAX, ACVRL1	3	geneontology_Biological_Process	0.00524476	Up
GO:0071800	podosome assembly	3/572	19/18866	0.0187	0.0703	0.051	BIN2, HCK, LCP1	3	geneontology_Biological_Process	0.00524476	Up
GO:2000010	positive regulation of protein localization to cell surface	3/572	19/18866	0.0187	0.0703	0.051	CD247, TYROBP, FCER1G	3	geneontology_Biological_Process	0.00524476	Up
GO:0002756	MyD88-independent toll-like receptor signaling pathway	4/572	34/18866	0.0189	0.0709	0.0514	CD14, CD300LF, CD40, TLR4	4	geneontology_Biological_Process	0.00699301	Up
GO:0040013	negative regulation of locomotion	20/572	397/18866	0.019	0.0713	0.0517	WAS, AIF1, ARHGAP4, CD300A, CD200R1, CD74, SLAMF8, HAS1, CXCL13, CCL2, TMIGD3, ACVRL1, IFITM1, APOE, BST2, HMOX1, PODN, DCN, CXCL12, SERPINE1	20	geneontology_Biological_Process	0.034965	Up
GO:1990845	adaptive thermogenesis	10/572	155/18866	0.0199	0.0746	0.0541	IL18, SYK, UCP2, CCR2, CMKLR1, TLR4, ADAMTS5, WNT10B, ALDH1A1, FABP4	10	geneontology_Biological_Process	0.0174825	Up
GO:0048260	positive regulation of receptor-mediated endocytosis	5/572	52/18866	0.0203	0.0759	0.0551	SYK, C3, DAB2, CCL19, SERPINE1	5	geneontology_Biological_Process	0.00874126	Up
GO:0051271	negative regulation of cellular component movement	20/572	400/18866	0.0204	0.0764	0.0554	WAS, AIF1, ARHGAP4, CD300A, CD200R1, CD74, SLAMF8, HAS1, CXCL13, CCL2, TMIGD3, ACVRL1, IFITM1, APOE, BST2, HMOX1, PODN, DCN, CXCL12, SERPINE1	20	geneontology_Biological_Process	0.034965	Up
GO:1904062	regulation of cation transmembrane transport	18/572	349/18866	0.0205	0.0766	0.0556	PTPN6, CORO1A, CTSS, CYBA, KCNQ1, XCL1, CCR2, LYN, P2RY6, STAC3, CXCL9, CXCL10, CXCL11, CCL2, RAMP3, APLNR, TREM2, MMP9	18	geneontology_Biological_Process	0.0314685	Up
GO:0035690	cellular response to drug	6/572	71/18866	0.0206	0.0768	0.0557	KCNQ1, FBP1, SLAMF8, CD69, AIM2, MT2A	6	geneontology_Biological_Process	0.0104895	Up
GO:0000187	activation of MAPK activity	10/572	156/18866	0.0207	0.0772	0.0561	SYK, MAP4K1, PTPRC, CD74, FPR1, PDE6G, TLR4, CCL19, C5AR1, IGFBP6	10	geneontology_Biological_Process	0.0174825	Up
GO:0098751	bone cell development	4/572	35/18866	0.0208	0.0775	0.0563	PTPN6, LILRB1, TYROBP, ZNF385A	4	geneontology_Biological_Process	0.00699301	Up
GO:0002418	immune response to tumor cell	3/572	20/18866	0.0215	0.0798	0.0579	HAVCR2, PRF1, CRTAM	3	geneontology_Biological_Process	0.00524476	Up
GO:0007252	I-kappaB phosphorylation	3/572	20/18866	0.0215	0.0798	0.0579	TLR2, TLR7, TLR4	3	geneontology_Biological_Process	0.00524476	Up
GO:0034138	toll-like receptor 3 signaling pathway	3/572	20/18866	0.0215	0.0798	0.0579	SCIMP, UNC93B1, HAVCR2	3	geneontology_Biological_Process	0.00524476	Up
GO:0051767	nitric-oxide synthase biosynthetic process	3/572	20/18866	0.0215	0.0798	0.0579	TLR2, CCL2, TLR4	3	geneontology_Biological_Process	0.00524476	Up
GO:0051769	regulation of nitric-oxide synthase biosynthetic process	3/572	20/18866	0.0215	0.0798	0.0579	TLR2, CCL2, TLR4	3	geneontology_Biological_Process	0.00524476	Up
GO:0045661	regulation of myoblast differentiation	5/572	53/18866	0.0219	0.081	0.0588	IL18, CXCL9, CXCL10, CCL17, CXCL14	5	geneontology_Biological_Process	0.00874126	Up
GO:0033280	response to vitamin D	4/572	36/18866	0.0229	0.0846	0.0614	CD4, CXCL10, AQP3, ALPL	4	geneontology_Biological_Process	0.00699301	Up
GO:0032088	negative regulation of NF-kappaB transcription factor activity	7/572	93/18866	0.0229	0.0847	0.0615	NLRP3, HAVCR2, PYCARD, FOXP3, CMKLR1, TMIGD3, AIM2	7	geneontology_Biological_Process	0.0122378	Up
GO:0110053	regulation of actin filament organization	15/572	278/18866	0.0229	0.0847	0.0615	WAS, GMFG, HCK, CORO1A, GPR65, HCLS1, NCKAP1L, PYCARD, CCR7, PLEK, CDC42EP2, ICAM1, S100A10, CXCL12, CCL26	15	geneontology_Biological_Process	0.0262238	Up
GO:0051222	positive regulation of protein transport	18/572	354/18866	0.0232	0.0857	0.0622	HLA-E, CD33, ITGB2, SYK, ITGAM, HCLS1, CD14, FGR, RAC2, TLR2, CD38, HLA-DRB1, CRTAM, CLEC4E, GZMB, TLR4, IL6, TREM2	18	geneontology_Biological_Process	0.0314685	Up
GO:0006979	response to oxidative stress	22/572	458/18866	0.0233	0.086	0.0624	RIPK3, NCF1, NCF4, BTK, CYBA, AIF1, TRPM2, CYBB, ALOX5, CD38, VNN1, NCF2, CCR7, TLR4, CCL19, CST3, APOE, ANXA1, IL6, HMOX1, MMP2, MMP9	22	geneontology_Biological_Process	0.0384615	Up
GO:0051656	establishment of organelle localization	21/572	432/18866	0.0234	0.0864	0.0627	VAMP8, MYO1F, BTK, LGALS9, SYK, LAT2, CD300A, FCER1G, FGR, MYO1G, CTSC, MYO7A, CD84, RAC2, MILR1, CTSZ, LYN, SERPINA1, PIK3CD, STXBP2, HMOX1	21	geneontology_Biological_Process	0.0367133	Up
GO:1903018	regulation of glycoprotein metabolic process	5/572	54/18866	0.0235	0.0865	0.0628	CCR7, JAK3, CCL19, CST3, PTX3	5	geneontology_Biological_Process	0.00874126	Up
GO:0010001	glial cell differentiation	13/572	230/18866	0.0236	0.0866	0.0629	C1QA, TNFRSF1B, TLR2, NRROS, LYN, S100A9, TLR4, S100A8, C5AR1, IL6, S100B, MXRA8, TREM2	13	geneontology_Biological_Process	0.0227273	Up
GO:0097191	extrinsic apoptotic signaling pathway	13/572	230/18866	0.0236	0.0866	0.0629	TMC8, TNFRSF1B, PTPRC, CD27, FASLG, PYCARD, TNFSF10, IFI27, BCL2A1, ICAM1, HMOX1, CD70, SERPINE1	13	geneontology_Biological_Process	0.0227273	Up
GO:0002693	positive regulation of cellular extravasation	3/572	21/18866	0.0246	0.0896	0.0651	PTAFR, CCR2, ICAM1	3	geneontology_Biological_Process	0.00524476	Up
GO:0006837	serotonin transport	3/572	21/18866	0.0246	0.0896	0.0651	LILRB1, SYK, FCER1G	3	geneontology_Biological_Process	0.00524476	Up
GO:0032516	positive regulation of phosphoprotein phosphatase activity	3/572	21/18866	0.0246	0.0896	0.0651	CD33, CD300A, PTPRC	3	geneontology_Biological_Process	0.00524476	Up
GO:0035455	response to interferon-alpha	3/572	21/18866	0.0246	0.0896	0.0651	PYHIN1, IFITM1, BST2	3	geneontology_Biological_Process	0.00524476	Up
GO:0036150	phosphatidylserine acyl-chain remodeling	3/572	21/18866	0.0246	0.0896	0.0651	PLA2G2D, PLA2G2A, PLA2G5	3	geneontology_Biological_Process	0.00524476	Up
GO:0090330	regulation of platelet aggregation	3/572	21/18866	0.0246	0.0896	0.0651	SYK, LYN, PDPN	3	geneontology_Biological_Process	0.00524476	Up
GO:0099515	actin filament-based transport	3/572	21/18866	0.0246	0.0896	0.0651	MYO1F, MYO1G, MYO7A	3	geneontology_Biological_Process	0.00524476	Up
GO:1903036	positive regulation of response to wounding	6/572	74/18866	0.0247	0.0899	0.0652	CLEC7A, PLEK, TLR4, ANXA1, SERPINE1, PDPN	6	geneontology_Biological_Process	0.0104895	Up
GO:2001259	positive regulation of cation channel activity	6/572	74/18866	0.0247	0.0899	0.0652	CTSS, CCR2, P2RY6, STAC3, CCL2, TREM2	6	geneontology_Biological_Process	0.0104895	Up
GO:0032147	activation of protein kinase activity	17/572	331/18866	0.0247	0.0899	0.0653	RIPK3, IL18, SYK, CD86, MAP4K1, CD300A, PTPRC, CD74, CCL5, FPR1, NCKAP1L, PDE6G, MAP3K8, TLR4, CCL19, C5AR1, IGFBP6	17	geneontology_Biological_Process	0.0297203	Up
GO:0055076	transition metal ion homeostasis	9/572	138/18866	0.0248	0.0903	0.0655	TMC8, LCK, S100A9, S100A8, HMOX1, SCARA5, STEAP4, MT1F, MT2A	9	geneontology_Biological_Process	0.0157343	Up
GO:0090218	positive regulation of lipid kinase activity	4/572	37/18866	0.025	0.091	0.066	FGR, LYN, CCR7, CCL19	4	geneontology_Biological_Process	0.00699301	Up
GO:0001706	endoderm formation	5/572	55/18866	0.0252	0.0914	0.0663	ITGB2, EOMES, DKK1, MMP2, MMP9	5	geneontology_Biological_Process	0.00874126	Up
GO:0001954	positive regulation of cell-matrix adhesion	5/572	55/18866	0.0252	0.0914	0.0663	SKAP1, CD3E, CSF1, CCR7, S100A10	5	geneontology_Biological_Process	0.00874126	Up
GO:0008347	glial cell migration	5/572	55/18866	0.0252	0.0914	0.0663	CSF1, CCL3, CCR2, CCL2, TREM2	5	geneontology_Biological_Process	0.00874126	Up
GO:0050709	negative regulation of protein secretion	7/572	95/18866	0.0254	0.0916	0.0665	RHBDF2, SRGN, FCGR2B, FOXP3, APOE, ANXA1, LRRC32	7	geneontology_Biological_Process	0.0122378	Up
GO:0070167	regulation of biomineral tissue development	7/572	95/18866	0.0254	0.0916	0.0665	ALOX5, CCR1, SRGN, CCL3, WNT10B, TMEM119, ECM1	7	geneontology_Biological_Process	0.0122378	Up
GO:0110149	regulation of biomineralization	7/572	95/18866	0.0254	0.0916	0.0665	ALOX5, CCR1, SRGN, CCL3, WNT10B, TMEM119, ECM1	7	geneontology_Biological_Process	0.0122378	Up
GO:1903725	regulation of phospholipid metabolic process	7/572	95/18866	0.0254	0.0916	0.0665	PIK3R5, SLA2, FGR, LYN, CCR7, CCL19, APOC1	7	geneontology_Biological_Process	0.0122378	Up
GO:0034765	regulation of ion transmembrane transport	23/572	489/18866	0.0256	0.0925	0.0671	PTPN6, PTAFR, CORO1A, CTSS, CYBA, CYBB, KCNQ1, TMEM37, XCL1, CCR2, LYN, KCNJ5, P2RY6, STAC3, CXCL9, CXCL10, ACSL5, CXCL11, CCL2, RAMP3, APLNR, TREM2, MMP9	23	geneontology_Biological_Process	0.0402098	Up
GO:1904019	epithelial cell apoptotic process	8/572	117/18866	0.0261	0.0939	0.0682	FASLG, CD40, CCL2, ICAM1, IL6, HMOX1, CD248, SERPINE1	8	geneontology_Biological_Process	0.013986	Up
GO:0031100	animal organ regeneration	6/572	75/18866	0.0262	0.0942	0.0683	LCP1, C5AR1, IL6, HMOX1, NNMT, CXCL12	6	geneontology_Biological_Process	0.0104895	Up
GO:0001666	response to hypoxia	18/572	359/18866	0.0262	0.0943	0.0685	CYBA, PSMB10, CYBB, TLR2, CD38, UCP2, PSMB9, CST3, ACVRL1, AQP3, PLAU, VASN, ICAM1, HMOX1, CXCL12, S100B, MMP2, VEGFD	18	geneontology_Biological_Process	0.0314685	Up
GO:0097305	response to alcohol	13/572	234/18866	0.0267	0.0958	0.0695	CYBA, SPI1, CYBB, CD14, MAP4K1, CCR5, CD27, CCL3, CCR7, P2RY6, CCL19, S100A8, ICAM1	13	geneontology_Biological_Process	0.0227273	Up
GO:0031529	ruffle organization	5/572	56/18866	0.027	0.0971	0.0704	AIF1, CSF1R, CCR7, PLEK, ICAM1	5	geneontology_Biological_Process	0.00874126	Up
GO:0000302	response to reactive oxygen species	13/572	235/18866	0.0275	0.0985	0.0715	RIPK3, NCF1, BTK, TRPM2, CCR7, CCL19, CST3, APOE, ANXA1, IL6, HMOX1, MMP2, MMP9	13	geneontology_Biological_Process	0.0227273	Up
GO:0001779	natural killer cell differentiation	3/572	22/18866	0.0278	0.0991	0.0719	PTPRC, ZNF683, PIK3CD	3	geneontology_Biological_Process	0.00524476	Up
GO:0002313	mature B cell differentiation involved in immune response	3/572	22/18866	0.0278	0.0991	0.0719	MFNG, FCGR2B, IL6	3	geneontology_Biological_Process	0.00524476	Up
GO:0006067	ethanol metabolic process	3/572	22/18866	0.0278	0.0991	0.0719	ADH1B, ADH1C, ALDH1A1	3	geneontology_Biological_Process	0.00524476	Up
GO:0032069	regulation of nuclease activity	3/572	22/18866	0.0278	0.0991	0.0719	GZMA, OAS1, OASL	3	geneontology_Biological_Process	0.00524476	Up
GO:0035584	calcium-mediated signaling using intracellular calcium source	3/572	22/18866	0.0278	0.0991	0.0719	TRPM2, PTPRC, DEFB1	3	geneontology_Biological_Process	0.00524476	Up
GO:1901739	regulation of myoblast fusion	3/572	22/18866	0.0278	0.0991	0.0719	CD53, CXCL9, CXCL10	3	geneontology_Biological_Process	0.00524476	Up
GO:1903019	negative regulation of glycoprotein metabolic process	3/572	22/18866	0.0278	0.0991	0.0719	JAK3, CST3, PTX3	3	geneontology_Biological_Process	0.00524476	Up
GO:1901184	regulation of ERBB signaling pathway	7/572	97/18866	0.0281	0.0999	0.0725	NCF1, RHBDF2, FASLG, LGMN, PDE6G, PLAUR, MMP9	7	geneontology_Biological_Process	0.0122378	Up
GO:0010822	positive regulation of mitochondrion organization	8/572	119/18866	0.0285	0.101	0.0735	RAC2, PYCARD, TNFSF10, GZMB, DCN, PLAUR, TREM2, MMP9	8	geneontology_Biological_Process	0.013986	Up
GO:0030278	regulation of ossification	12/572	212/18866	0.0286	0.102	0.0738	ALOX5, CSF1, CCR1, SRGN, CCL3, IFITM1, DKK1, IL6, WNT10B, TMEM119, TWIST2, ECM1	12	geneontology_Biological_Process	0.020979	Up
GO:0002200	somatic diversification of immune receptors	6/572	77/18866	0.0293	0.104	0.0755	BATF, PTPRC, TBX21, CD28, CD40, FOXP3	6	geneontology_Biological_Process	0.0104895	Up
GO:0032691	negative regulation of interleukin-1 beta production	4/572	39/18866	0.0298	0.106	0.0766	CD33, NLRP3, TREM2, ACP5	4	geneontology_Biological_Process	0.00699301	Up
GO:0000768	syncytium formation by plasma membrane fusion	5/572	58/18866	0.0309	0.109	0.0794	CD53, TYROBP, CXCL9, CXCL10, TREM2	5	geneontology_Biological_Process	0.00874126	Up
GO:0140253	cell-cell fusion	5/572	58/18866	0.0309	0.109	0.0794	CD53, TYROBP, CXCL9, CXCL10, TREM2	5	geneontology_Biological_Process	0.00874126	Up
GO:0050688	regulation of defense response to virus	6/572	78/18866	0.031	0.11	0.0795	IL12RB1, LILRB1, IL2RA, PYCARD, AIM2, FGL2	6	geneontology_Biological_Process	0.0104895	Up
GO:0045649	regulation of macrophage differentiation	3/572	23/18866	0.0313	0.11	0.0801	HCLS1, C1QC, CSF1	3	geneontology_Biological_Process	0.00524476	Up
GO:0046135	pyrimidine nucleoside catabolic process	3/572	23/18866	0.0313	0.11	0.0801	TYMP, APOBEC3H, NT5E	3	geneontology_Biological_Process	0.00524476	Up
GO:0071404	cellular response to low-density lipoprotein particle stimulus	3/572	23/18866	0.0313	0.11	0.0801	ITGB2, SYK, FCER1G	3	geneontology_Biological_Process	0.00524476	Up
GO:0097193	intrinsic apoptotic signaling pathway	15/572	290/18866	0.0317	0.112	0.0812	RIPK3, LCK, TNFRSF1B, CASP4, CD74, VNN1, PYCARD, S100A9, ZNF385A, BCL2A1, S100A8, HMOX1, PLAUR, CXCL12, MMP9	15	geneontology_Biological_Process	0.0262238	Up
GO:0001990	regulation of systemic arterial blood pressure by hormone	4/572	40/18866	0.0323	0.114	0.0825	CYBA, CTSZ, CTSG, CPA3	4	geneontology_Biological_Process	0.00699301	Up
GO:0050691	regulation of defense response to virus by host	4/572	40/18866	0.0323	0.114	0.0825	IL12RB1, LILRB1, PYCARD, AIM2	4	geneontology_Biological_Process	0.00699301	Up
GO:0043525	positive regulation of neuron apoptotic process	5/572	59/18866	0.033	0.116	0.0841	ITGAM, TYROBP, FASLG, CCL3, CTSZ	5	geneontology_Biological_Process	0.00874126	Up
GO:0010810	regulation of cell-substrate adhesion	12/572	217/18866	0.0334	0.117	0.0851	SKAP1, CD3E, CSF1, RAC2, CCR7, ACVRL1, PLAU, FBLN2, SPOCK2, S100A10, SERPINE1, PDPN	12	geneontology_Biological_Process	0.020979	Up
GO:0038095	Fc-epsilon receptor signaling pathway	10/572	169/18866	0.0335	0.118	0.0854	VAV1, LCP2, BTK, PSMB10, SYK, LAT2, FCER1G, CARD11, LYN, PSMB9	10	geneontology_Biological_Process	0.0174825	Up
GO:0071248	cellular response to metal ion	11/572	193/18866	0.0337	0.118	0.0856	NCF1, TRPM2, CYBB, FBP1, ALOX5AP, LGMN, HMOX1, MT1F, MT2A, FABP4, MMP9	11	geneontology_Biological_Process	0.0192308	Up
GO:0070482	response to oxygen levels	19/572	396/18866	0.0337	0.118	0.0856	CYBA, PSMB10, CYBB, TLR2, CD38, UCP2, PSMB9, CST3, ACVRL1, AQP3, PLAU, VASN, ICAM1, HMOX1, CXCL12, S100B, MMP2, PDPN, VEGFD	19	geneontology_Biological_Process	0.0332168	Up
GO:1904951	positive regulation of establishment of protein localization	18/572	370/18866	0.0339	0.119	0.086	HLA-E, CD33, ITGB2, SYK, ITGAM, HCLS1, CD14, FGR, RAC2, TLR2, CD38, HLA-DRB1, CRTAM, CLEC4E, GZMB, TLR4, IL6, TREM2	18	geneontology_Biological_Process	0.0314685	Up
GO:0036293	response to decreased oxygen levels	18/572	371/18866	0.0346	0.12	0.0874	CYBA, PSMB10, CYBB, TLR2, CD38, UCP2, PSMB9, CST3, ACVRL1, AQP3, PLAU, VASN, ICAM1, HMOX1, CXCL12, S100B, MMP2, VEGFD	18	geneontology_Biological_Process	0.0314685	Up
GO:0071902	positive regulation of protein serine, threonine kinase activity	17/572	345/18866	0.0347	0.12	0.0874	PIK3R5, FGD2, SYK, CSF1R, MAP4K1, PTPRC, CD74, FPR1, PDE6G, CD40, MAP3K8, FAM20A, TLR4, CCL19, C5AR1, DKK1, IGFBP6	17	geneontology_Biological_Process	0.0297203	Up
GO:0046578	regulation of Ras protein signal transduction	11/572	194/18866	0.0348	0.12	0.0874	VAV1, RASAL3, CYTH4, RASGRP4, GPR65, CSF1, P2RY8, FBP1, LYN, P2RY10, APOE	11	geneontology_Biological_Process	0.0192308	Up
GO:0002251	organ or tissue specific immune response	4/572	41/18866	0.035	0.12	0.0874	XCL1, RNASE2, IL6, DEFB1	4	geneontology_Biological_Process	0.00699301	Up
GO:0034695	response to prostaglandin E	3/572	24/18866	0.035	0.12	0.0874	CCR7, P2RY6, CCL19	3	geneontology_Biological_Process	0.00524476	Up
GO:0006949	syncytium formation	5/572	60/18866	0.0351	0.12	0.0874	CD53, TYROBP, CXCL9, CXCL10, TREM2	5	geneontology_Biological_Process	0.00874126	Up
GO:0030865	cortical cytoskeleton organization	5/572	60/18866	0.0351	0.12	0.0874	FMNL1, RHOH, RAC2, NCKAP1L, PLEK	5	geneontology_Biological_Process	0.00874126	Up
GO:0061098	positive regulation of protein tyrosine kinase activity	5/572	60/18866	0.0351	0.12	0.0874	NCF1, CSF1R, FCGR1A, CCL5, LILRA5	5	geneontology_Biological_Process	0.00874126	Up
GO:0019062	virion attachment to host cell	2/572	10/18866	0.0351	0.12	0.0874	CD209, ICAM1	2	geneontology_Biological_Process	0.0034965	Up
GO:0032661	regulation of interleukin-18 production	2/572	10/18866	0.0351	0.12	0.0874	CD84, TLR2	2	geneontology_Biological_Process	0.0034965	Up
GO:0032817	regulation of natural killer cell proliferation	2/572	10/18866	0.0351	0.12	0.0874	IL18, HLA-E	2	geneontology_Biological_Process	0.0034965	Up
GO:0034135	regulation of toll-like receptor 2 signaling pathway	2/572	10/18866	0.0351	0.12	0.0874	CYBA, LYN	2	geneontology_Biological_Process	0.0034965	Up
GO:0043380	regulation of memory T cell differentiation	2/572	10/18866	0.0351	0.12	0.0874	IL12RB1, FGL2	2	geneontology_Biological_Process	0.0034965	Up
GO:0044351	macropinocytosis	2/572	10/18866	0.0351	0.12	0.0874	DOCK2, PYCARD	2	geneontology_Biological_Process	0.0034965	Up
GO:0045348	positive regulation of MHC class II biosynthetic process	2/572	10/18866	0.0351	0.12	0.0874	CIITA, TLR4	2	geneontology_Biological_Process	0.0034965	Up
GO:0060346	bone trabecula formation	2/572	10/18866	0.0351	0.12	0.0874	WNT10B, MMP2	2	geneontology_Biological_Process	0.0034965	Up
GO:0070099	regulation of chemokine-mediated signaling pathway	2/572	10/18866	0.0351	0.12	0.0874	CCL5, TREM2	2	geneontology_Biological_Process	0.0034965	Up
GO:0071104	response to interleukin-9	2/572	10/18866	0.0351	0.12	0.0874	IL2RG, JAK3	2	geneontology_Biological_Process	0.0034965	Up
GO:0090385	phagosome-lysosome fusion	2/572	10/18866	0.0351	0.12	0.0874	RAB20, PLA2G5	2	geneontology_Biological_Process	0.0034965	Up
GO:1900426	positive regulation of defense response to bacterium	2/572	10/18866	0.0351	0.12	0.0874	CYBA, HAVCR2	2	geneontology_Biological_Process	0.0034965	Up
GO:1901748	leukotriene D4 metabolic process	2/572	10/18866	0.0351	0.12	0.0874	GGTA1, GGT5	2	geneontology_Biological_Process	0.0034965	Up
GO:1901750	leukotriene D4 biosynthetic process	2/572	10/18866	0.0351	0.12	0.0874	GGTA1, GGT5	2	geneontology_Biological_Process	0.0034965	Up
GO:2000109	regulation of macrophage apoptotic process	2/572	10/18866	0.0351	0.12	0.0874	CCR5, CCL5	2	geneontology_Biological_Process	0.0034965	Up
GO:2000320	negative regulation of T-helper 17 cell differentiation	2/572	10/18866	0.0351	0.12	0.0874	TBX21, FOXP3	2	geneontology_Biological_Process	0.0034965	Up
GO:0007584	response to nutrient	10/572	171/18866	0.0359	0.123	0.0892	CD4, CYBB, CD3E, FOLR2, CD40, CXCL10, C2, AQP3, HMOX1, ALPL	10	geneontology_Biological_Process	0.0174825	Up
GO:0007163	establishment or maintenance of cell polarity	12/572	220/18866	0.0365	0.125	0.0906	PARVG, DOCK2, CCL4, DOCK8, CD3G, RHOH, RAC2, SPN, NCKAP1L, CCR7, CRTAM, CCL19	12	geneontology_Biological_Process	0.020979	Up
GO:0008277	regulation of G protein-coupled receptor signaling pathway	9/572	148/18866	0.0366	0.125	0.0907	RASGRP4, CCL5, RGS18, PLEK, C3, PDE6G, RAMP3, RGS1, APLNR	9	geneontology_Biological_Process	0.0157343	Up
GO:0001952	regulation of cell-matrix adhesion	8/572	125/18866	0.0366	0.125	0.0907	SKAP1, CD3E, CSF1, CCR7, ACVRL1, PLAU, S100A10, SERPINE1	8	geneontology_Biological_Process	0.013986	Up
GO:0008630	intrinsic apoptotic signaling pathway in response to DNA damage	7/572	103/18866	0.0372	0.127	0.092	TNFRSF1B, CD74, PYCARD, ZNF385A, BCL2A1, HMOX1, CXCL12	7	geneontology_Biological_Process	0.0122378	Up
GO:0010574	regulation of vascular endothelial growth factor production	5/572	61/18866	0.0373	0.127	0.0923	C3AR1, CCR2, C3, C5AR1, IL6	5	geneontology_Biological_Process	0.00874126	Up
GO:0090279	regulation of calcium ion import	4/572	42/18866	0.0377	0.128	0.0931	CCL3, CCL2, RAMP3, CXCL12	4	geneontology_Biological_Process	0.00699301	Up
GO:0098760	response to interleukin-7	4/572	42/18866	0.0377	0.128	0.0931	BTK, IL2RG, JAK3, IL7R	4	geneontology_Biological_Process	0.00699301	Up
GO:0098761	cellular response to interleukin-7	4/572	42/18866	0.0377	0.128	0.0931	BTK, IL2RG, JAK3, IL7R	4	geneontology_Biological_Process	0.00699301	Up
GO:0048660	regulation of smooth muscle cell proliferation	10/572	173/18866	0.0384	0.13	0.0946	PTAFR, IL18, CYBA, AIF1, CCL5, P2RY6, IL6, HMOX1, MMP2, MMP9	10	geneontology_Biological_Process	0.0174825	Up
GO:0010447	response to acidic pH	3/572	25/18866	0.0389	0.132	0.0956	CTSS, GPR65, LGMN	3	geneontology_Biological_Process	0.00524476	Up
GO:0050927	positive regulation of positive chemotaxis	3/572	25/18866	0.0389	0.132	0.0956	IL16, CXCL12, VEGFD	3	geneontology_Biological_Process	0.00524476	Up
GO:1905809	negative regulation of synapse organization	3/572	25/18866	0.0389	0.132	0.0956	LILRB2, TLR2, DKK1	3	geneontology_Biological_Process	0.00524476	Up
GO:0015718	monocarboxylic acid transport	10/572	174/18866	0.0397	0.134	0.0975	SYK, SLCO2B1, ACSL5, PLA2G2D, PLA2G2A, EMB, APOE, ANXA1, PLA2G5, FABP4	10	geneontology_Biological_Process	0.0174825	Up
GO:0048259	regulation of receptor-mediated endocytosis	7/572	105/18866	0.0406	0.137	0.0996	SYK, C3, DAB2, CCL19, DKK1, APOC1, SERPINE1	7	geneontology_Biological_Process	0.0122378	Up
GO:0051154	negative regulation of striated muscle cell differentiation	4/572	43/18866	0.0407	0.137	0.0997	CXCL10, DKK1, PI16, TMEM119	4	geneontology_Biological_Process	0.00699301	Up
GO:0051258	protein polymerization	15/572	300/18866	0.0408	0.138	0.1	WAS, GMFG, HCK, CORO1A, AIF1, PSTPIP1, HCLS1, NCKAP1L, PYCARD, CCR7, CDC42EP2, ICAM1, TPPP3, CCL26, GAS7	15	geneontology_Biological_Process	0.0262238	Up
GO:0048659	smooth muscle cell proliferation	10/572	175/18866	0.041	0.138	0.1	PTAFR, IL18, CYBA, AIF1, CCL5, P2RY6, IL6, HMOX1, MMP2, MMP9	10	geneontology_Biological_Process	0.0174825	Up
GO:0014013	regulation of gliogenesis	8/572	128/18866	0.0412	0.139	0.101	TNFRSF1B, CSF1, TLR2, CCL3, CCR2, LYN, IL6, TREM2	8	geneontology_Biological_Process	0.013986	Up
GO:0001787	natural killer cell proliferation	2/572	11/18866	0.0421	0.139	0.101	IL18, HLA-E	2	geneontology_Biological_Process	0.0034965	Up
GO:0006048	UDP-N-acetylglucosamine biosynthetic process	2/572	11/18866	0.0421	0.139	0.101	RENBP, GFPT2	2	geneontology_Biological_Process	0.0034965	Up
GO:0006054	N-acetylneuraminate metabolic process	2/572	11/18866	0.0421	0.139	0.101	NPL, RENBP	2	geneontology_Biological_Process	0.0034965	Up
GO:0033860	regulation of NAD(P)H oxidase activity	2/572	11/18866	0.0421	0.139	0.101	CYBA, SLAMF8	2	geneontology_Biological_Process	0.0034965	Up
GO:0034372	very-low-density lipoprotein particle remodeling	2/572	11/18866	0.0421	0.139	0.101	CETP, APOE	2	geneontology_Biological_Process	0.0034965	Up
GO:0043379	memory T cell differentiation	2/572	11/18866	0.0421	0.139	0.101	IL12RB1, FGL2	2	geneontology_Biological_Process	0.0034965	Up
GO:0044803	multi-organism membrane organization	2/572	11/18866	0.0421	0.139	0.101	CD4, CCR5	2	geneontology_Biological_Process	0.0034965	Up
GO:0051024	positive regulation of immunoglobulin secretion	2/572	11/18866	0.0421	0.139	0.101	HLA-E, IL6	2	geneontology_Biological_Process	0.0034965	Up
GO:0060368	regulation of Fc receptor mediated stimulatory signaling pathway	2/572	11/18866	0.0421	0.139	0.101	PTPRC, LYN	2	geneontology_Biological_Process	0.0034965	Up
GO:0070254	mucus secretion	2/572	11/18866	0.0421	0.139	0.101	VAMP8, CYBA	2	geneontology_Biological_Process	0.0034965	Up
GO:0070339	response to bacterial lipopeptide	2/572	11/18866	0.0421	0.139	0.101	CD14, TLR2	2	geneontology_Biological_Process	0.0034965	Up
GO:0070673	response to interleukin-18	2/572	11/18866	0.0421	0.139	0.101	IL18, ALOX5	2	geneontology_Biological_Process	0.0034965	Up
GO:0070757	interleukin-35-mediated signaling pathway	2/572	11/18866	0.0421	0.139	0.101	STAT4, EBI3	2	geneontology_Biological_Process	0.0034965	Up
GO:0071220	cellular response to bacterial lipoprotein	2/572	11/18866	0.0421	0.139	0.101	CD14, TLR2	2	geneontology_Biological_Process	0.0034965	Up
GO:0071221	cellular response to bacterial lipopeptide	2/572	11/18866	0.0421	0.139	0.101	CD14, TLR2	2	geneontology_Biological_Process	0.0034965	Up
GO:0090715	immunological memory formation process	2/572	11/18866	0.0421	0.139	0.101	IL12RB1, FGL2	2	geneontology_Biological_Process	0.0034965	Up
GO:0099624	atrial cardiac muscle cell membrane repolarization	2/572	11/18866	0.0421	0.139	0.101	KCNQ1, KCNJ5	2	geneontology_Biological_Process	0.0034965	Up
GO:0140052	cellular response to oxidised low-density lipoprotein particle stimulus	2/572	11/18866	0.0421	0.139	0.101	CD68, TLR4	2	geneontology_Biological_Process	0.0034965	Up
GO:1903265	positive regulation of tumor necrosis factor-mediated signaling pathway	2/572	11/18866	0.0421	0.139	0.101	CASP4, CASP1	2	geneontology_Biological_Process	0.0034965	Up
GO:2000317	negative regulation of T-helper 17 type immune response	2/572	11/18866	0.0421	0.139	0.101	TBX21, FOXP3	2	geneontology_Biological_Process	0.0034965	Up
GO:2000318	positive regulation of T-helper 17 type immune response	2/572	11/18866	0.0421	0.139	0.101	IL12RB1, NLRP3	2	geneontology_Biological_Process	0.0034965	Up
GO:2001138	regulation of phospholipid transport	2/572	11/18866	0.0421	0.139	0.101	CETP, APOE	2	geneontology_Biological_Process	0.0034965	Up
GO:2001140	positive regulation of phospholipid transport	2/572	11/18866	0.0421	0.139	0.101	CETP, APOE	2	geneontology_Biological_Process	0.0034965	Up
GO:0030279	negative regulation of ossification	6/572	84/18866	0.0422	0.139	0.101	CCR1, SRGN, CCL3, DKK1, TWIST2, ECM1	6	geneontology_Biological_Process	0.0104895	Up
GO:0032414	positive regulation of ion transmembrane transporter activity	7/572	106/18866	0.0424	0.14	0.101	PTAFR, CTSS, CCR2, P2RY6, STAC3, CCL2, TREM2	7	geneontology_Biological_Process	0.0122378	Up
GO:0034101	erythrocyte homeostasis	8/572	129/18866	0.0428	0.141	0.102	INPP5D, SPI1, HCLS1, IKZF1, NCKAP1L, LYN, JAK3, HMOX1	8	geneontology_Biological_Process	0.013986	Up
GO:0001945	lymph vessel development	3/572	26/18866	0.043	0.141	0.102	SYK, ACVRL1, PDPN	3	geneontology_Biological_Process	0.00524476	Up
GO:0002347	response to tumor cell	3/572	26/18866	0.043	0.141	0.102	HAVCR2, PRF1, CRTAM	3	geneontology_Biological_Process	0.00524476	Up
GO:0050926	regulation of positive chemotaxis	3/572	26/18866	0.043	0.141	0.102	IL16, CXCL12, VEGFD	3	geneontology_Biological_Process	0.00524476	Up
GO:1903010	regulation of bone development	3/572	26/18866	0.043	0.141	0.102	LILRB1, TYROBP, TMEM119	3	geneontology_Biological_Process	0.00524476	Up
GO:0035307	positive regulation of protein dephosphorylation	4/572	44/18866	0.0437	0.143	0.104	CD33, LILRB2, CD300A, PTPRC	4	geneontology_Biological_Process	0.00699301	Up
GO:1903053	regulation of extracellular matrix organization	4/572	44/18866	0.0437	0.143	0.104	TNFRSF1B, CST3, IL6, PDPN	4	geneontology_Biological_Process	0.00699301	Up
GO:0000018	regulation of DNA recombination	7/572	107/18866	0.0442	0.145	0.105	WAS, PTPRC, TBX21, CD28, CD40, FOXP3, IL7R	7	geneontology_Biological_Process	0.0122378	Up
GO:0032526	response to retinoic acid	7/572	108/18866	0.0461	0.151	0.11	CD38, LYN, AQP3, DKK1, PTGES, WNT2, WNT10B	7	geneontology_Biological_Process	0.0122378	Up
GO:0045445	myoblast differentiation	6/572	86/18866	0.0465	0.152	0.11	IL18, CXCL9, CXCL10, CCL17, WNT10B, CXCL14	6	geneontology_Biological_Process	0.0104895	Up
GO:0070266	necroptotic process	4/572	45/18866	0.0469	0.153	0.111	RIPK3, CD14, FASLG, TLR4	4	geneontology_Biological_Process	0.00699301	Up
GO:0010573	vascular endothelial growth factor production	5/572	65/18866	0.047	0.153	0.111	C3AR1, CCR2, C3, C5AR1, IL6	5	geneontology_Biological_Process	0.00874126	Up
GO:0031646	positive regulation of nervous system process	5/572	65/18866	0.047	0.153	0.111	PTAFR, TNFRSF1B, CST7, ITGAX, S100B	5	geneontology_Biological_Process	0.00874126	Up
GO:0032897	negative regulation of viral transcription	3/572	27/18866	0.0473	0.154	0.112	CCL4, CCL5, CCL3	3	geneontology_Biological_Process	0.00524476	Up
GO:0010876	lipid localization	20/572	440/18866	0.0479	0.156	0.113	SYK, SLCO2B1, APOBR, MSR1, C3, APOL3, CETP, ACSL5, PLTP, PLA2G2D, APOL1, PLA2G2A, APOL4, APOC1, APOE, ANXA1, IL6, ABCA9, PLA2G5, FABP4	20	geneontology_Biological_Process	0.034965	Up
GO:0001867	complement activation, lectin pathway	2/572	12/18866	0.0495	0.16	0.116	SERPING1, FCN1	2	geneontology_Biological_Process	0.0034965	Up
GO:0010454	negative regulation of cell fate commitment	2/572	12/18866	0.0495	0.16	0.116	TBX21, DKK1	2	geneontology_Biological_Process	0.0034965	Up
GO:0016554	cytidine to uridine editing	2/572	12/18866	0.0495	0.16	0.116	RBM47, APOBEC3H	2	geneontology_Biological_Process	0.0034965	Up
GO:0031392	regulation of prostaglandin biosynthetic process	2/572	12/18866	0.0495	0.16	0.116	CD74, ANXA1	2	geneontology_Biological_Process	0.0034965	Up
GO:0032957	inositol trisphosphate metabolic process	2/572	12/18866	0.0495	0.16	0.116	PTAFR, P2RY6	2	geneontology_Biological_Process	0.0034965	Up
GO:0033700	phospholipid efflux	2/572	12/18866	0.0495	0.16	0.116	APOC1, APOE	2	geneontology_Biological_Process	0.0034965	Up
GO:0044650	adhesion of symbiont to host cell	2/572	12/18866	0.0495	0.16	0.116	CD209, ICAM1	2	geneontology_Biological_Process	0.0034965	Up
GO:0071888	macrophage apoptotic process	2/572	12/18866	0.0495	0.16	0.116	CCR5, CCL5	2	geneontology_Biological_Process	0.0034965	Up
GO:1901503	ether biosynthetic process	2/572	12/18866	0.0495	0.16	0.116	ALOX5, PLA2G5	2	geneontology_Biological_Process	0.0034965	Up
GO:1902950	regulation of dendritic spine maintenance	2/572	12/18866	0.0495	0.16	0.116	FCGR2B, APOE	2	geneontology_Biological_Process	0.0034965	Up
GO:1903961	positive regulation of anion transmembrane transport	2/572	12/18866	0.0495	0.16	0.116	PTAFR, ACSL5	2	geneontology_Biological_Process	0.0034965	Up
GO:1905522	negative regulation of macrophage migration	2/572	12/18866	0.0495	0.16	0.116	CD200R1, SLAMF8	2	geneontology_Biological_Process	0.0034965	Up
GO:2001204	regulation of osteoclast development	2/572	12/18866	0.0495	0.16	0.116	LILRB1, TYROBP	2	geneontology_Biological_Process	0.0034965	Up
GO:0032271	regulation of protein polymerization	12/572	231/18866	0.0497	0.16	0.116	WAS, GMFG, HCK, CORO1A, HCLS1, NCKAP1L, PYCARD, CCR7, CDC42EP2, ICAM1, TPPP3, CCL26	12	geneontology_Biological_Process	0.020979	Up
GO:0009897	external side of plasma membrane	73/593	417/19559	8.06e-35	2.37e-32	1.64e-32	HLA-E, CSF3R, IL12RB1, CD33, LILRB1, CD4, ITGB2, IL2RG, TLR8, ITGAM, CD3D, CD2, CSF2RA, CXCR3, CD86, CD14, CCRL2, CD3E, FCER1G, PTPRC, CCR5, CD3G, CD200R1, CD74, SELL, CCR1, CXCR6, IL2RA, CD27, CD163, HLA-DRB1, SPN, FASLG, CD5, EBI3, ICOS, FOLR2, CD163L1, CCR2, CD69, KCNJ5, CD6, CD8A, CCR7, IL2RB, MSR1, FCGR3A, CD209, CD28, FCGR2B, PDCD1, CXCL9, CD40, FCN1, CTLA4, CXCL10, TNFRSF18, HLA-F, IL7R, C…	73	geneontology_Cellular_Component	0.123103	Up
GO:0042611	MHC protein complex	18/593	25/19559	1.44e-22	2.11e-20	1.46e-20	HLA-E, HLA-DMB, HLA-DMA, CD74, HLA-DPB1, HLA-DRB1, HLA-DRA, HLA-B, HLA-DPA1, HLA-C, HLA-DOA, HLA-DQA1, HLA-DRB5, HLA-DQB1, HLA-F, HLA-DQB2, HLA-DOB, HLA-DQA2	18	geneontology_Cellular_Component	0.0303541	Up
GO:0070820	tertiary granule	36/593	164/19559	4.75e-21	3.72e-19	2.57e-19	PTPN6, VAMP8, PTAFR, CTSS, CD33, LAIR1, CYBA, ITGB2, CD53, TRPM2, ITGAM, CYBB, LILRB2, DOK3, CD300A, FCER1G, TBC1D10C, CFP, FPR1, NCKAP1L, SIGLEC14, CLEC12A, TMC6, CR1, STXBP2, GPR84, LYZ, ITGAX, CST3, OSCAR, PLAU, CXCL1, CD55, TNFAIP6, PTX3, MMP9	36	geneontology_Cellular_Component	0.0607083	Up
GO:0030667	secretory granule membrane	48/593	306/19559	5.06e-21	3.72e-19	2.57e-19	VAMP8, PTAFR, CD33, LAIR1, CYBA, ITGB2, CD53, TRPM2, ITGAM, CYBB, LILRB2, DOK3, ITGAL, TYROBP, CD14, TNFRSF1B, LILRB3, CD300A, FCER1G, NFAM1, TBC1D10C, C3AR1, PTPRC, SIGLEC9, TLR2, CD38, SELL, VNN1, FPR1, NCKAP1L, SIGLEC14, CLEC12A, HLA-B, TMC6, CR1, HLA-C, FCGR2A, STXBP2, GPR84, CD68, ITGAX, C5AR1, ANPEP, PLAU, BST2, SLC2A5, CD55, PLAUR	48	geneontology_Cellular_Component	0.0809444	Up
GO:0042613	MHC class II protein complex	14/593	16/19559	5.42e-20	3.18e-18	2.2e-18	HLA-DMB, HLA-DMA, CD74, HLA-DPB1, HLA-DRB1, HLA-DRA, HLA-DPA1, HLA-DOA, HLA-DQA1, HLA-DRB5, HLA-DQB1, HLA-DQB2, HLA-DOB, HLA-DQA2	14	geneontology_Cellular_Component	0.0236088	Up
GO:0030139	endocytic vesicle	44/593	313/19559	1.71e-17	8.38e-16	5.79e-16	NCF1, VAMP8, WAS, HLA-E, NCF4, CORO1A, CTSS, CYBA, SCIMP, MPEG1, SYK, CYBB, FCGR1B, FMNL1, UNC93B1, STAB1, FCGR1A, RAC2, CD74, TLR2, HLA-DPB1, CD163, HLA-DRB1, HLA-DRA, TLR7, NCF2, HLA-B, HLA-DPA1, MSR1, HLA-C, STXBP2, RAB20, HLA-DQA1, CTLA4, HLA-DRB5, HLA-DQB1, HLA-F, MARCO, GNLY, HLA-DQB2, CDC42EP2, APOE, HLA-DQA2, PLA2G5	44	geneontology_Cellular_Component	0.074199	Up
GO:0001772	immunological synapse	17/593	39/19559	3.39e-16	1.42e-14	9.83e-15	CORO1A, SCIMP, CD37, CD53, LCK, SKAP1, HAVCR2, CD3E, GZMA, RHOH, ZAP70, CARD11, CD6, CRTAM, CD28, GZMB, ICAM1	17	geneontology_Cellular_Component	0.0286678	Up
GO:0062023	collagen-containing extracellular matrix	49/593	427/19559	1.06e-15	3.9e-14	2.7e-14	CTSS, LGALS9, C1QA, C1QC, C1QB, CTSC, CFP, CTSZ, SERPINA1, S100A9, SERPING1, FCN1, F13A1, S100A4, ADAMDEC1, CLEC3B, CST3, S100A8, FBLN2, ICAM1, APOE, ANXA1, PODN, DCN, S100A10, EMILIN2, TNXB, FGL2, ADAMTS2, CXCL12, LUM, WNT2, EFEMP1, NTN4, PCOLCE, ADAMTS5, CTSG, SLPI, PRG4, TPSAB1, SERPINE1, MXRA5, MMP2, TPSB2, SRPX2, ECM1, CPA3, DPT, MMP9	49	geneontology_Cellular_Component	0.0826307	Up
GO:0071556	integral component of lumenal side of endoplasmic reticulum membrane	14/593	29/19559	2.43e-14	7.15e-13	4.94e-13	HLA-E, CD74, HLA-DPB1, HLA-DRB1, HLA-DRA, HLA-B, HLA-DPA1, HLA-C, HLA-DQA1, HLA-DRB5, HLA-DQB1, HLA-F, HLA-DQB2, HLA-DQA2	14	geneontology_Cellular_Component	0.0236088	Up
GO:0098553	lumenal side of endoplasmic reticulum membrane	14/593	29/19559	2.43e-14	7.15e-13	4.94e-13	HLA-E, CD74, HLA-DPB1, HLA-DRB1, HLA-DRA, HLA-B, HLA-DPA1, HLA-C, HLA-DQA1, HLA-DRB5, HLA-DQB1, HLA-F, HLA-DQB2, HLA-DQA2	14	geneontology_Cellular_Component	0.0236088	Up
GO:0042581	specific granule	28/593	160/19559	5.38e-14	1.34e-12	9.25e-13	PTPN6, VAMP8, CD33, LAIR1, CYBA, ITGB2, CD53, TRPM2, ITGAM, CYBB, DOCK2, ITGAL, TNFRSF1B, C3AR1, CFP, CLEC12A, CTSZ, TMC6, STXBP2, GPR84, LYZ, OSCAR, PLAU, CXCL1, SLC2A5, PLAUR, PTX3, SLPI	28	geneontology_Cellular_Component	0.0472175	Up
GO:0060205	cytoplasmic vesicle lumen	40/593	326/19559	5.47e-14	1.34e-12	9.25e-13	PTPN6, BIN2, FERMT3, ARHGAP9, GMFG, ARHGAP45, DOCK2, ALOX5, HK3, FGR, CTSW, CTSC, ADA2, CFP, FASLG, FUCA1, SRGN, RNASET2, PYCARD, CTSZ, SERPINA1, S100A9, C3, SERPING1, LYZ, FCN1, MNDA, F13A1, CFD, RNASE2, CLEC3B, S100A8, OSCAR, CXCL1, PTX3, CTSG, SLPI, SERPINE1, ECM1, VEGFD	40	geneontology_Cellular_Component	0.0674536	Up
GO:0031983	vesicle lumen	40/593	328/19559	6.7e-14	1.52e-12	1.05e-12	PTPN6, BIN2, FERMT3, ARHGAP9, GMFG, ARHGAP45, DOCK2, ALOX5, HK3, FGR, CTSW, CTSC, ADA2, CFP, FASLG, FUCA1, SRGN, RNASET2, PYCARD, CTSZ, SERPINA1, S100A9, C3, SERPING1, LYZ, FCN1, MNDA, F13A1, CFD, RNASE2, CLEC3B, S100A8, OSCAR, CXCL1, PTX3, CTSG, SLPI, SERPINE1, ECM1, VEGFD	40	geneontology_Cellular_Component	0.0674536	Up
GO:0045335	phagocytic vesicle	26/593	140/19559	1.01e-13	2e-12	1.39e-12	NCF1, VAMP8, WAS, HLA-E, NCF4, CORO1A, CTSS, CYBA, SCIMP, MPEG1, SYK, CYBB, FMNL1, UNC93B1, RAC2, TLR2, TLR7, NCF2, HLA-B, HLA-C, STXBP2, RAB20, HLA-F, GNLY, CDC42EP2, PLA2G5	26	geneontology_Cellular_Component	0.0438449	Up
GO:0030666	endocytic vesicle membrane	28/593	164/19559	1.02e-13	2e-12	1.39e-12	VAMP8, HLA-E, CORO1A, CYBA, CYBB, FCGR1B, STAB1, FCGR1A, RAC2, CD74, TLR2, HLA-DPB1, CD163, HLA-DRB1, HLA-DRA, HLA-B, HLA-DPA1, MSR1, HLA-C, RAB20, HLA-DQA1, HLA-DRB5, HLA-DQB1, HLA-F, MARCO, HLA-DQB2, APOE, HLA-DQA2	28	geneontology_Cellular_Component	0.0472175	Up
GO:0034774	secretory granule lumen	39/593	322/19559	1.74e-13	3.19e-12	2.21e-12	PTPN6, BIN2, FERMT3, ARHGAP9, GMFG, ARHGAP45, DOCK2, ALOX5, HK3, FGR, CTSW, CTSC, ADA2, CFP, FUCA1, SRGN, RNASET2, PYCARD, CTSZ, SERPINA1, S100A9, C3, SERPING1, LYZ, FCN1, MNDA, F13A1, CFD, RNASE2, CLEC3B, S100A8, OSCAR, CXCL1, PTX3, CTSG, SLPI, SERPINE1, ECM1, VEGFD	39	geneontology_Cellular_Component	0.0657673	Up
GO:0070821	tertiary granule membrane	19/593	73/19559	3.7e-13	6.4e-12	4.42e-12	VAMP8, PTAFR, CD33, LAIR1, CYBA, ITGB2, CD53, TRPM2, ITGAM, CYBB, LILRB2, CD300A, FCER1G, SIGLEC14, CLEC12A, TMC6, GPR84, ITGAX, PLAU	19	geneontology_Cellular_Component	0.0320405	Up
GO:0098576	lumenal side of membrane	14/593	36/19559	9.78e-13	1.6e-11	1.1e-11	HLA-E, CD74, HLA-DPB1, HLA-DRB1, HLA-DRA, HLA-B, HLA-DPA1, HLA-C, HLA-DQA1, HLA-DRB5, HLA-DQB1, HLA-F, HLA-DQB2, HLA-DQA2	14	geneontology_Cellular_Component	0.0236088	Up
GO:0030669	clathrin-coated endocytic vesicle membrane	13/593	40/19559	9.11e-11	1.41e-09	9.74e-10	FCGR1B, FCGR1A, CD74, HLA-DPB1, HLA-DRB1, HLA-DRA, HLA-DPA1, HLA-DQA1, HLA-DRB5, HLA-DQB1, HLA-DQB2, APOE, HLA-DQA2	13	geneontology_Cellular_Component	0.0219224	Up
GO:0035579	specific granule membrane	18/593	91/19559	2.19e-10	3.22e-09	2.22e-09	VAMP8, CD33, LAIR1, CYBA, ITGB2, CD53, TRPM2, ITGAM, CYBB, ITGAL, TNFRSF1B, C3AR1, CLEC12A, TMC6, GPR84, PLAU, SLC2A5, PLAUR	18	geneontology_Cellular_Component	0.0303541	Up
GO:0045334	clathrin-coated endocytic vesicle	14/593	59/19559	1.8e-09	2.52e-08	1.74e-08	FCGR1B, FCGR1A, CD74, HLA-DPB1, HLA-DRB1, HLA-DRA, HLA-DPA1, HLA-DQA1, CTLA4, HLA-DRB5, HLA-DQB1, HLA-DQB2, APOE, HLA-DQA2	14	geneontology_Cellular_Component	0.0236088	Up
GO:0030665	clathrin-coated vesicle membrane	19/593	118/19559	2.69e-09	3.6e-08	2.49e-08	VAMP8, CD4, CD3D, FCGR1B, FCGR1A, CD3G, CD74, HLA-DPB1, HLA-DRB1, HLA-DRA, HLA-DPA1, DAB2, HLA-DQA1, HLA-DRB5, HLA-DQB1, IL7R, HLA-DQB2, APOE, HLA-DQA2	19	geneontology_Cellular_Component	0.0320405	Up
GO:0030134	COPII-coated ER to Golgi transport vesicle	17/593	95/19559	3.52e-09	4.44e-08	3.07e-08	HLA-E, CTSC, CD74, HLA-DPB1, HLA-DRB1, HLA-DRA, HLA-B, CTSZ, HLA-DPA1, SERPINA1, HLA-C, HLA-DQA1, HLA-DRB5, HLA-DQB1, HLA-F, HLA-DQB2, HLA-DQA2	17	geneontology_Cellular_Component	0.0286678	Up
GO:0012507	ER to Golgi transport vesicle membrane	14/593	62/19559	3.62e-09	4.44e-08	3.07e-08	HLA-E, CD74, HLA-DPB1, HLA-DRB1, HLA-DRA, HLA-B, HLA-DPA1, HLA-C, HLA-DQA1, HLA-DRB5, HLA-DQB1, HLA-F, HLA-DQB2, HLA-DQA2	14	geneontology_Cellular_Component	0.0236088	Up
GO:0045121	membrane raft	32/593	329/19559	7.16e-09	8.42e-08	5.82e-08	LCP2, HCK, SELPLG, BTK, INPP5D, CD4, ITGB2, ITGAM, LCK, SKAP1, LAT2, CD2, CD14, TNFRSF1B, CD48, NFAM1, KCNQ1, PTPRC, ZAP70, CARD11, TLR2, FASLG, LYN, CD8A, CD79A, ICAM1, BST2, HMOX1, S100A10, TFPI, CD55, PDPN	32	geneontology_Cellular_Component	0.0539629	Up
GO:0098857	membrane microdomain	32/593	330/19559	7.71e-09	8.72e-08	6.02e-08	LCP2, HCK, SELPLG, BTK, INPP5D, CD4, ITGB2, ITGAM, LCK, SKAP1, LAT2, CD2, CD14, TNFRSF1B, CD48, NFAM1, KCNQ1, PTPRC, ZAP70, CARD11, TLR2, FASLG, LYN, CD8A, CD79A, ICAM1, BST2, HMOX1, S100A10, TFPI, CD55, PDPN	32	geneontology_Cellular_Component	0.0539629	Up
GO:0030662	coated vesicle membrane	23/593	183/19559	8.42e-09	9.16e-08	6.33e-08	VAMP8, HLA-E, CD4, CD3D, FCGR1B, FCGR1A, CD3G, CD74, HLA-DPB1, HLA-DRB1, HLA-DRA, HLA-B, HLA-DPA1, DAB2, HLA-C, HLA-DQA1, HLA-DRB5, HLA-DQB1, HLA-F, IL7R, HLA-DQB2, APOE, HLA-DQA2	23	geneontology_Cellular_Component	0.0387858	Up
GO:0005765	lysosomal membrane	34/593	375/19559	1.43e-08	1.45e-07	1e-07	VAMP8, TRPM2, HLA-DMB, TLR8, HLA-DMA, LAPTM5, MARCHF1, NFAM1, C3AR1, MYO7A, CD74, HLA-DPB1, VNN1, HLA-DRB1, SLC15A3, FPR1, HLA-DRA, TLR7, HLA-DPA1, DAB2, DRAM1, HLA-DOA, HLA-DQA1, HLA-DRB5, CD68, HLA-DQB1, HLA-F, CYB561, HLA-DQB2, HLA-DOB, ANPEP, VASN, BST2, HLA-DQA2	34	geneontology_Cellular_Component	0.0573356	Up
GO:0098852	lytic vacuole membrane	34/593	375/19559	1.43e-08	1.45e-07	1e-07	VAMP8, TRPM2, HLA-DMB, TLR8, HLA-DMA, LAPTM5, MARCHF1, NFAM1, C3AR1, MYO7A, CD74, HLA-DPB1, VNN1, HLA-DRB1, SLC15A3, FPR1, HLA-DRA, TLR7, HLA-DPA1, DAB2, DRAM1, HLA-DOA, HLA-DQA1, HLA-DRB5, CD68, HLA-DQB1, HLA-F, CYB561, HLA-DQB2, HLA-DOB, ANPEP, VASN, BST2, HLA-DQA2	34	geneontology_Cellular_Component	0.0573356	Up
GO:0098589	membrane region	32/593	343/19559	1.95e-08	1.91e-07	1.32e-07	LCP2, HCK, SELPLG, BTK, INPP5D, CD4, ITGB2, ITGAM, LCK, SKAP1, LAT2, CD2, CD14, TNFRSF1B, CD48, NFAM1, KCNQ1, PTPRC, ZAP70, CARD11, TLR2, FASLG, LYN, CD8A, CD79A, ICAM1, BST2, HMOX1, S100A10, TFPI, CD55, PDPN	32	geneontology_Cellular_Component	0.0539629	Up
GO:0101003	ficolin-1-rich granule membrane	13/593	61/19559	2.77e-08	2.63e-07	1.82e-07	ITGB2, TRPM2, LILRB2, DOK3, CD300A, FCER1G, TBC1D10C, FPR1, NCKAP1L, SIGLEC14, CR1, ITGAX, CD55	13	geneontology_Cellular_Component	0.0219224	Up
GO:0098802	plasma membrane signaling receptor complex	29/593	307/19559	6.92e-08	6.36e-07	4.4e-07	PTPN6, CSF2RB, IL12RB1, CD4, ITGB2, SYK, ITGAM, CD3D, SKAP1, CD247, ITGAL, CD3E, APBB1IP, CD8B, CD3G, ZAP70, TLR2, IL2RA, LYN, CD6, CD8A, IL2RB, CD40, CD79A, ITGAX, ACVRL1, RAMP3, CD79B, IL6	29	geneontology_Cellular_Component	0.0489039	Up
GO:0005774	vacuolar membrane	35/593	427/19559	1.09e-07	9.74e-07	6.73e-07	VAMP8, TRPM2, HLA-DMB, TLR8, TMEM150B, HLA-DMA, LAPTM5, MARCHF1, NFAM1, C3AR1, MYO7A, CD74, HLA-DPB1, VNN1, HLA-DRB1, SLC15A3, FPR1, HLA-DRA, TLR7, HLA-DPA1, DAB2, DRAM1, HLA-DOA, HLA-DQA1, HLA-DRB5, CD68, HLA-DQB1, HLA-F, CYB561, HLA-DQB2, HLA-DOB, ANPEP, VASN, BST2, HLA-DQA2	35	geneontology_Cellular_Component	0.0590219	Up
GO:0030135	coated vesicle	28/593	298/19559	1.3e-07	1.13e-06	7.78e-07	DENND1C, VAMP8, HLA-E, CD4, CD3D, FCGR1B, CTSC, FCGR1A, CD3G, CD74, HLA-DPB1, HLA-DRB1, HLA-DRA, HLA-B, CTSZ, HLA-DPA1, SERPINA1, DAB2, HLA-C, HLA-DQA1, CTLA4, HLA-DRB5, HLA-DQB1, HLA-F, IL7R, HLA-DQB2, APOE, HLA-DQA2	28	geneontology_Cellular_Component	0.0472175	Up
GO:0005766	primary lysosome	19/593	155/19559	2.47e-07	2.02e-06	1.4e-06	VAMP8, ARHGAP45, NFAM1, C3AR1, CTSC, ADA2, VNN1, FUCA1, FPR1, RNASET2, PYCARD, C3, STXBP2, LYZ, MNDA, CD68, RNASE2, BST2, CTSG	19	geneontology_Cellular_Component	0.0320405	Up
GO:0042582	azurophil granule	19/593	155/19559	2.47e-07	2.02e-06	1.4e-06	VAMP8, ARHGAP45, NFAM1, C3AR1, CTSC, ADA2, VNN1, FUCA1, FPR1, RNASET2, PYCARD, C3, STXBP2, LYZ, MNDA, CD68, RNASE2, BST2, CTSG	19	geneontology_Cellular_Component	0.0320405	Up
GO:0030136	clathrin-coated vesicle	21/593	194/19559	4.87e-07	3.87e-06	2.67e-06	DENND1C, VAMP8, CD4, CD3D, FCGR1B, FCGR1A, CD3G, CD74, HLA-DPB1, HLA-DRB1, HLA-DRA, HLA-DPA1, DAB2, HLA-DQA1, CTLA4, HLA-DRB5, HLA-DQB1, IL7R, HLA-DQB2, APOE, HLA-DQA2	21	geneontology_Cellular_Component	0.0354132	Up
GO:0042629	mast cell granule	7/593	22/19559	2.61e-06	2.02e-05	1.39e-05	BTK, LAT2, SRGN, MILR1, LYN, PIK3CD, ANXA1	7	geneontology_Cellular_Component	0.0118044	Up
GO:1904724	tertiary granule lumen	10/593	55/19559	5.2e-06	3.92e-05	2.71e-05	PTPN6, CTSS, CFP, LYZ, CST3, OSCAR, CXCL1, TNFAIP6, PTX3, MMP9	10	geneontology_Cellular_Component	0.0168634	Up
GO:0030660	Golgi-associated vesicle membrane	14/593	112/19559	7.44e-06	5.47e-05	3.78e-05	HLA-E, CD74, HLA-DPB1, HLA-DRB1, HLA-DRA, HLA-B, HLA-DPA1, HLA-C, HLA-DQA1, HLA-DRB5, HLA-DQB1, HLA-F, HLA-DQB2, HLA-DQA2	14	geneontology_Cellular_Component	0.0236088	Up
GO:0001891	phagocytic cup	7/593	27/19559	1.19e-05	8.53e-05	5.9e-05	BIN2, CORO1A, AIF1, MYO1G, LCP1, TLR4, ANXA1	7	geneontology_Cellular_Component	0.0118044	Up
GO:0043020	NADPH oxidase complex	5/593	12/19559	1.67e-05	0.000117	8.09e-05	NCF1, NCF4, CYBA, CYBB, NCF2	5	geneontology_Cellular_Component	0.0084317	Up
GO:0030670	phagocytic vesicle membrane	11/593	77/19559	1.98e-05	0.000135	9.33e-05	VAMP8, HLA-E, CORO1A, CYBA, CYBB, RAC2, TLR2, HLA-B, HLA-C, RAB20, HLA-F	11	geneontology_Cellular_Component	0.0185497	Up
GO:0005775	vacuolar lumen	17/593	173/19559	2.14e-05	0.000143	9.87e-05	ARHGAP45, CTSS, CTSC, CD74, ADA2, FASLG, FUCA1, RNASET2, PYCARD, LGMN, C3, LYZ, MNDA, RNASE2, DCN, LUM, CTSG	17	geneontology_Cellular_Component	0.0286678	Up
GO:0101002	ficolin-1-rich granule	14/593	124/19559	2.42e-05	0.000154	0.000107	BIN2, GMFG, CTSS, ALOX5, HK3, CTSZ, SERPINA1, FCN1, MNDA, CFD, CST3, FGL2, TNFAIP6, MMP9	14	geneontology_Cellular_Component	0.0236088	Up
GO:1904813	ficolin-1-rich granule lumen	14/593	124/19559	2.42e-05	0.000154	0.000107	BIN2, GMFG, CTSS, ALOX5, HK3, CTSZ, SERPINA1, FCN1, MNDA, CFD, CST3, FGL2, TNFAIP6, MMP9	14	geneontology_Cellular_Component	0.0236088	Up
GO:0005798	Golgi-associated vesicle	17/593	181/19559	3.83e-05	0.000239	0.000165	HLA-E, CTSC, CD74, HLA-DPB1, HLA-DRB1, HLA-DRA, HLA-B, CTSZ, HLA-DPA1, SERPINA1, HLA-C, HLA-DQA1, HLA-DRB5, HLA-DQB1, HLA-F, HLA-DQB2, HLA-DQA2	17	geneontology_Cellular_Component	0.0286678	Up
GO:0019897	extrinsic component of plasma membrane	16/593	172/19559	7.21e-05	0.000441	0.000305	HCK, GNA15, SYK, SLA, LCK, FGR, GNGT2, ZAP70, LYN, STAC3, FCN1, ST14, ANXA1, S100A10, RGS1, WNT2	16	geneontology_Cellular_Component	0.0269815	Up
GO:0034358	plasma lipoprotein particle	7/593	36/19559	8.83e-05	0.000509	0.000352	APOBR, MSR1, CETP, PLTP, APOL1, APOC1, APOE	7	geneontology_Cellular_Component	0.0118044	Up
GO:0098636	protein complex involved in cell adhesion	7/593	36/19559	8.83e-05	0.000509	0.000352	ITGB2, ITGAM, ITGAL, LYN, CD28, CTLA4, ITGAX	7	geneontology_Cellular_Component	0.0118044	Up
GO:1990777	lipoprotein particle	7/593	36/19559	8.83e-05	0.000509	0.000352	APOBR, MSR1, CETP, PLTP, APOL1, APOC1, APOE	7	geneontology_Cellular_Component	0.0118044	Up
GO:0035578	azurophil granule lumen	11/593	91/19559	9.54e-05	0.00053	0.000366	ARHGAP45, CTSC, ADA2, FUCA1, RNASET2, PYCARD, C3, LYZ, MNDA, RNASE2, CTSG	11	geneontology_Cellular_Component	0.0185497	Up
GO:0030176	integral component of endoplasmic reticulum membrane	15/593	158/19559	9.55e-05	0.00053	0.000366	HLA-E, CD74, HLA-DPB1, HLA-DRB1, HLA-DRA, HLA-B, HLA-DPA1, HLA-C, SLC37A2, HLA-DQA1, HLA-DRB5, HLA-DQB1, HLA-F, HLA-DQB2, HLA-DQA2	15	geneontology_Cellular_Component	0.0252951	Up
GO:0035580	specific granule lumen	9/593	62/19559	9.86e-05	0.000537	0.000371	PTPN6, DOCK2, CFP, CTSZ, LYZ, OSCAR, CXCL1, PTX3, SLPI	9	geneontology_Cellular_Component	0.0151771	Up
GO:0061702	inflammasome complex	5/593	17/19559	0.000115	0.000615	0.000425	NLRP3, CASP4, CASP1, PYCARD, AIM2	5	geneontology_Cellular_Component	0.0084317	Up
GO:0032588	trans-Golgi network membrane	11/593	94/19559	0.000128	0.000674	0.000466	MARCHF1, CD74, HLA-DPB1, HLA-DRB1, HLA-DRA, HLA-DPA1, HLA-DQA1, HLA-DRB5, HLA-DQB1, HLA-DQB2, HLA-DQA2	11	geneontology_Cellular_Component	0.0185497	Up
GO:0032994	protein-lipid complex	7/593	39/19559	0.00015	0.000775	0.000536	APOBR, MSR1, CETP, PLTP, APOL1, APOC1, APOE	7	geneontology_Cellular_Component	0.0118044	Up
GO:0031227	intrinsic component of endoplasmic reticulum membrane	15/593	166/19559	0.000166	0.000842	0.000582	HLA-E, CD74, HLA-DPB1, HLA-DRB1, HLA-DRA, HLA-B, HLA-DPA1, HLA-C, SLC37A2, HLA-DQA1, HLA-DRB5, HLA-DQB1, HLA-F, HLA-DQB2, HLA-DQA2	15	geneontology_Cellular_Component	0.0252951	Up
GO:0019898	extrinsic component of membrane	22/593	306/19559	0.000175	0.000874	0.000604	NCF1, PIK3R5, HCK, GNA15, SYK, SLA, LCK, SLA2, FGR, GNGT2, ZAP70, LYN, PIK3CD, STAC3, FCN1, ST14, ANXA1, S100A10, PLAUR, RGS1, WNT2, DEFB1	22	geneontology_Cellular_Component	0.0370995	Up
GO:0031234	extrinsic component of cytoplasmic side of plasma membrane	11/593	99/19559	0.000204	0.001	0.000692	HCK, GNA15, SYK, SLA, LCK, FGR, GNGT2, ZAP70, LYN, STAC3, RGS1	11	geneontology_Cellular_Component	0.0185497	Up
GO:0031225	anchored component of membrane	15/593	171/19559	0.00023	0.00111	0.000767	DPEP2, CD52, CD2, CD14, CD48, VNN1, VNN2, FOLR2, BST2, TFPI, CD55, PLAUR, XPNPEP2, NT5E, ALPL	15	geneontology_Cellular_Component	0.0252951	Up
GO:0042101	T cell receptor complex	13/593	140/19559	0.000341	0.00162	0.00112	PTPN6, CD4, SYK, CD3D, SKAP1, CD247, CD3E, APBB1IP, CD8B, CD3G, ZAP70, CD6, CD8A	13	geneontology_Cellular_Component	0.0219224	Up
GO:0031901	early endosome membrane	14/593	161/19559	0.000403	0.00188	0.0013	VAMP8, SNX20, HLA-E, FGD2, FCGR1B, MARCHF1, CD8B, FCGR1A, HLA-B, HLA-C, HLA-F, DKK1, ANXA1, STEAP4	14	geneontology_Cellular_Component	0.0236088	Up
GO:0001931	uropod	4/593	13/19559	0.000481	0.00213	0.00147	SELPLG, SCIMP, PSTPIP1, SPN	4	geneontology_Cellular_Component	0.00674536	Up
GO:0031254	cell trailing edge	4/593	13/19559	0.000481	0.00213	0.00147	SELPLG, SCIMP, PSTPIP1, SPN	4	geneontology_Cellular_Component	0.00674536	Up
GO:0032009	early phagosome	4/593	13/19559	0.000481	0.00213	0.00147	SYK, UNC93B1, TLR7, PLA2G5	4	geneontology_Cellular_Component	0.00674536	Up
GO:0009898	cytoplasmic side of plasma membrane	14/593	164/19559	0.000485	0.00213	0.00147	HCK, GNA15, SYK, SLA, LCK, CD2, PTPN7, FGR, PTPRC, GNGT2, ZAP70, LYN, STAC3, RGS1	14	geneontology_Cellular_Component	0.0236088	Up
GO:0005769	early endosome	24/593	377/19559	0.000549	0.00237	0.00164	VAMP8, SNX20, HLA-E, FGD2, CORO1A, CD4, FCGR1B, SIGLEC1, HAVCR2, WDFY4, MARCHF1, KCNQ1, CD8B, FCGR1A, HLA-B, CYTIP, HLA-C, HLA-F, TLR4, DKK1, APOE, ACKR1, ANXA1, STEAP4	24	geneontology_Cellular_Component	0.0404722	Up
GO:0098562	cytoplasmic side of membrane	15/593	188/19559	0.000632	0.00269	0.00186	RASAL3, HCK, GNA15, SYK, SLA, LCK, CD2, PTPN7, FGR, PTPRC, GNGT2, ZAP70, LYN, STAC3, RGS1	15	geneontology_Cellular_Component	0.0252951	Up
GO:0005770	late endosome	19/593	278/19559	0.000877	0.00368	0.00255	VAMP8, CTSS, HLA-DMB, SIGLEC1, HLA-DMA, SLA2, MARCHF1, KCNQ1, CD74, CST7, HLA-DRB1, HLA-DRA, LGMN, VAMP5, HLA-DRB5, CD68, CD79A, CST3, BST2	19	geneontology_Cellular_Component	0.0320405	Up
GO:0031093	platelet alpha granule lumen	8/593	67/19559	0.00092	0.00378	0.00261	FERMT3, SRGN, SERPINA1, SERPING1, F13A1, CFD, SERPINE1, VEGFD	8	geneontology_Cellular_Component	0.0134907	Up
GO:0005884	actin filament	11/593	118/19559	0.000927	0.00378	0.00261	WAS, HCK, CORO1A, AIF1, PSTPIP1, HCLS1, RAC2, LCP1, RCSD1, ANXA1, GAS7	11	geneontology_Cellular_Component	0.0185497	Up
GO:0005767	secondary lysosome	4/593	16/19559	0.00114	0.00458	0.00317	NCF1, NCF4, NCF2, PLA2G5	4	geneontology_Cellular_Component	0.00674536	Up
GO:0034364	high-density lipoprotein particle	5/593	27/19559	0.00117	0.00464	0.00321	CETP, PLTP, APOL1, APOC1, APOE	5	geneontology_Cellular_Component	0.0084317	Up
GO:0005581	collagen trimer	9/593	87/19559	0.00128	0.00501	0.00346	C1QA, C1QC, C1QB, MSR1, FCN1, MARCO, DCN, EMILIN2, LUM	9	geneontology_Cellular_Component	0.0151771	Up
GO:0035577	azurophil granule membrane	7/593	58/19559	0.00179	0.00692	0.00478	VAMP8, NFAM1, C3AR1, VNN1, FPR1, CD68, BST2	7	geneontology_Cellular_Component	0.0118044	Up
GO:0030658	transport vesicle membrane	15/593	209/19559	0.00184	0.00703	0.00486	HLA-E, CD74, HLA-DPB1, HLA-DRB1, HLA-DRA, HLA-B, HLA-DPA1, HLA-C, HLA-DQA1, HLA-DRB5, HLA-DQB1, HLA-F, CYB561, HLA-DQB2, HLA-DQA2	15	geneontology_Cellular_Component	0.0252951	Up
GO:0072562	blood microparticle	12/593	148/19559	0.00187	0.00704	0.00486	C1QC, C1QB, C3, SERPING1, JCHAIN, F13A1, C1S, APOL1, C1R, APOE, CFB, CFH	12	geneontology_Cellular_Component	0.0202361	Up
GO:0008305	integrin complex	5/593	31/19559	0.00223	0.00829	0.00573	ITGB2, ITGAM, ITGAL, LYN, ITGAX	5	geneontology_Cellular_Component	0.0084317	Up
GO:0044853	plasma membrane raft	10/593	113/19559	0.0023	0.00847	0.00585	LCP2, HCK, SELPLG, ITGB2, ITGAM, SKAP1, FASLG, CD8A, HMOX1, TFPI	10	geneontology_Cellular_Component	0.0168634	Up
GO:0034361	very-low-density lipoprotein particle	4/593	20/19559	0.00275	0.00975	0.00674	APOBR, APOL1, APOC1, APOE	4	geneontology_Cellular_Component	0.00674536	Up
GO:0034385	triglyceride-rich plasma lipoprotein particle	4/593	20/19559	0.00275	0.00975	0.00674	APOBR, APOL1, APOC1, APOE	4	geneontology_Cellular_Component	0.00674536	Up
GO:0036019	endolysosome	4/593	20/19559	0.00275	0.00975	0.00674	CTSS, TLR8, TLR7, LGMN	4	geneontology_Cellular_Component	0.00674536	Up
GO:0097197	tetraspanin-enriched microdomain	3/593	10/19559	0.00284	0.00982	0.00679	SCIMP, TSPAN33, PDPN	3	geneontology_Cellular_Component	0.00505902	Up
GO:0005788	endoplasmic reticulum lumen	19/593	308/19559	0.00284	0.00982	0.00679	CD4, CSF1, CTSC, CFP, EBI3, TSPAN33, RNASET2, CTSZ, SERPINA1, C3, MZB1, APOL1, CST3, APOE, IL6, PLAUR, MXRA8, ADAMTS5, RCN3	19	geneontology_Cellular_Component	0.0320405	Up
GO:0034362	low-density lipoprotein particle	3/593	13/19559	0.00632	0.0213	0.0147	APOBR, MSR1, APOE	3	geneontology_Cellular_Component	0.00505902	Up
GO:0042627	chylomicron	3/593	13/19559	0.00632	0.0213	0.0147	APOBR, APOC1, APOE	3	geneontology_Cellular_Component	0.00505902	Up
GO:0031091	platelet alpha granule	8/593	91/19559	0.00638	0.0213	0.0147	FERMT3, SRGN, SERPINA1, SERPING1, F13A1, CFD, SERPINE1, VEGFD	8	geneontology_Cellular_Component	0.0134907	Up
GO:0031089	platelet dense granule lumen	3/593	14/19559	0.00786	0.026	0.0179	CTSW, CLEC3B, ECM1	3	geneontology_Cellular_Component	0.00505902	Up
GO:0001726	ruffle	12/593	179/19559	0.00858	0.028	0.0194	FGD3, FGD2, ARHGAP45, AIF1, SCIMP, SAMSN1, FGR, LCP1, PLEK, TLR4, S100B, PDPN	12	geneontology_Cellular_Component	0.0202361	Up
GO:0043202	lysosomal lumen	8/593	96/19559	0.00874	0.0282	0.0195	CTSS, CD74, FASLG, FUCA1, RNASET2, LGMN, DCN, LUM	8	geneontology_Cellular_Component	0.0134907	Up
GO:0140375	immune receptor activity	43/578	135/18352	1.39e-31	8.19e-29	6.44e-29	CSF2RB, IL10RA, CSF3R, IL12RB1, LILRB1, CD4, IL2RG, LILRB2, FCGR1B, CSF2RA, CXCR3, CCRL2, FCER1G, C3AR1, CCR5, CD200R1, CD74, CCR1, CXCR6, IL2RA, HLA-DRB1, EBI3, FPR1, HLA-DRA, CCR2, HLA-DPA1, CCR7, IL2RB, CR1, FPR3, FCGR2B, HLA-DOA, HLA-DQA1, CMKLR1, IL21R, HLA-DQB1, IL15RA, IL7R, HLA-DQB2, HLA-DOB, C5AR1, HLA-DQA2, IL20RB	43	geneontology_Molecular_Function	0.0743945	Up
GO:0008009	chemokine activity	22/578	49/18352	1.39e-20	4.07e-18	3.21e-18	CCL4, CCL5, CCL3, CCL8, XCL2, XCL1, CCL23, CXCL16, CCL3L1, CXCL9, CXCL10, CXCL11, CCL13, CXCL13, CCL2, CCL19, CCL17, CXCL1, CCL18, CXCL12, CCL26, CXCL14	22	geneontology_Molecular_Function	0.0380623	Up
GO:0042379	chemokine receptor binding	25/578	70/18352	2.94e-20	5.76e-18	4.54e-18	CCRL2, CCL4, CCL5, CCL3, CCL8, XCL2, XCL1, CCR2, CCL23, CXCL16, CCL3L1, CXCL9, CXCL10, CXCL11, CCL13, CXCL13, CCL2, CCL19, CCL17, CXCL1, CCL18, CXCL12, CCL26, DEFB1, CXCL14	25	geneontology_Molecular_Function	0.0432526	Up
GO:0005126	cytokine receptor binding	43/578	271/18352	1.5e-18	2.2e-16	1.73e-16	IL18, IL12RB1, LTB, SYK, TNFSF13B, TNFSF8, CCRL2, CCL4, CSF1, CCL5, FASLG, EBI3, CCL3, CCL8, XCL2, PYCARD, XCL1, CCR2, CCL23, CXCL16, CD300LF, CCL3L1, CXCL9, TNFSF10, CXCL10, CXCL11, CCL13, CXCL13, CCL2, CCL19, CCL17, CXCL1, OSM, IL6, CCL18, CXCL12, CCL26, TNFSF9, CD70, DEFB1, ECM1, VEGFD, CXCL14	43	geneontology_Molecular_Function	0.0743945	Up
GO:0005125	cytokine activity	40/578	235/18352	1.9e-18	2.23e-16	1.75e-16	IL18, LTB, TNFSF13B, TNFSF8, IL16, CCL4, CSF1, CCL5, FASLG, EBI3, CCL3, CCL8, XCL2, XCL1, CCL23, CXCL16, IL32, CCL3L1, CXCL9, TNFSF10, CXCL10, CMTM7, CXCL11, CCL13, CXCL13, CCL2, SECTM1, CCL19, CCL17, CXCL1, OSM, IL6, CCL18, CXCL12, CCL26, WNT2, WNT10B, TNFSF9, CD70, CXCL14	40	geneontology_Molecular_Function	0.0692042	Up
GO:0048020	CCR chemokine receptor binding	18/578	47/18352	1.4e-15	1.37e-13	1.08e-13	CCRL2, CCL4, CCL5, CCL3, CCL8, XCL2, XCL1, CCR2, CCL23, CCL3L1, CCL13, CXCL13, CCL2, CCL19, CCL17, CCL18, CCL26, DEFB1	18	geneontology_Molecular_Function	0.0311419	Up
GO:0019955	cytokine binding	27/578	135/18352	1.21e-14	1.01e-12	7.99e-13	TMC8, IL10RA, CSF3R, IL12RB1, CD4, IL2RG, CSF1R, CSF2RA, CXCR3, CCRL2, TNFRSF1B, CCR5, CD74, CCR1, CXCR6, NRROS, IL2RA, EBI3, CCR2, CCR7, IL2RB, ACVRL1, VASN, ACKR1, LRRC32, IL20RB, PDPN	27	geneontology_Molecular_Function	0.0467128	Up
GO:0004896	cytokine receptor activity	23/578	97/18352	2.39e-14	1.75e-12	1.38e-12	CSF2RB, IL10RA, CSF3R, IL12RB1, CD4, IL2RG, CSF2RA, CXCR3, CCRL2, CCR5, CD74, CCR1, CXCR6, IL2RA, EBI3, CCR2, CCR7, IL2RB, CMKLR1, IL21R, IL15RA, IL7R, IL20RB	23	geneontology_Molecular_Function	0.0397924	Up
GO:0032395	MHC class II receptor activity	9/578	10/18352	2.79e-13	1.82e-11	1.43e-11	HLA-DRB1, HLA-DRA, HLA-DPA1, HLA-DOA, HLA-DQA1, HLA-DQB1, HLA-DQB2, HLA-DOB, HLA-DQA2	9	geneontology_Molecular_Function	0.0155709	Up
GO:0048018	receptor ligand activity	48/578	487/18352	2.54e-12	1.49e-10	1.17e-10	IL18, GMFG, LTB, TNFSF13B, TNFSF8, TYMP, IL16, CCL4, CSF1, CCL5, ADA2, FASLG, EBI3, CCL3, CCL8, XCL2, XCL1, CCL23, CXCL16, IL32, CCL3L1, CXCL9, TNFSF10, CXCL10, CMTM7, CXCL11, CCL13, CXCL13, CCL2, METRNL, SECTM1, CCL19, CCL17, CXCL1, CDC42EP2, DKK1, OSM, IL6, CCL18, CXCL12, CCL26, WNT2, EFEMP1, WNT10B, TNFSF9, CD70, VEGFD, CXCL14	48	geneontology_Molecular_Function	0.083045	Up
GO:0030546	signaling receptor activator activity	48/578	492/18352	3.67e-12	1.96e-10	1.54e-10	IL18, GMFG, LTB, TNFSF13B, TNFSF8, TYMP, IL16, CCL4, CSF1, CCL5, ADA2, FASLG, EBI3, CCL3, CCL8, XCL2, XCL1, CCL23, CXCL16, IL32, CCL3L1, CXCL9, TNFSF10, CXCL10, CMTM7, CXCL11, CCL13, CXCL13, CCL2, METRNL, SECTM1, CCL19, CCL17, CXCL1, CDC42EP2, DKK1, OSM, IL6, CCL18, CXCL12, CCL26, WNT2, EFEMP1, WNT10B, TNFSF9, CD70, VEGFD, CXCL14	48	geneontology_Molecular_Function	0.083045	Up
GO:0042605	peptide antigen binding	12/578	31/18352	6.95e-11	3.4e-09	2.68e-09	HLA-E, HLA-DPB1, HLA-DRB1, HLA-DRA, HLA-B, HLA-DPA1, HLA-C, CD209, HLA-DQA1, HLA-DRB5, HLA-DQB1, HLA-F	12	geneontology_Molecular_Function	0.0207612	Up
GO:0030246	carbohydrate binding	32/578	267/18352	9.18e-11	4.15e-09	3.26e-09	CD33, LGALS9, SIGLEC1, HK3, SIGLEC7, SIGLEC9, CLEC4A, CLEC7A, CLEC10A, SELL, HLA-DRB1, FBP1, CD72, HLA-DRA, SIGLEC14, CLEC12A, KLRB1, CD69, SIGLEC11, LGALS2, MRC1, CD209, SIGLEC10, FCN1, CLEC4E, FUOM, CLEC3B, CLEC4G, SLC2A5, CD248, PTX3, PRG4	32	geneontology_Molecular_Function	0.0553633	Up
GO:0001664	G protein-coupled receptor binding	33/578	293/18352	2.43e-10	1.02e-08	8.04e-09	GNA15, CCRL2, CCL4, CCL5, ADA2, FPR1, CCL3, CCL8, XCL2, XCL1, CCR2, CCL23, CXCL16, C3, CCL3L1, CXCL9, FCN1, CXCL10, CXCL11, CCL13, CXCL13, MARCO, CCL2, CCL19, CCL17, CXCL1, CCL18, CXCL12, CCL26, WNT2, WNT10B, DEFB1, CXCL14	33	geneontology_Molecular_Function	0.0570934	Up
GO:0038187	pattern recognition receptor activity	10/578	23/18352	7.03e-10	2.75e-08	2.17e-08	PTAFR, TLR8, CD14, CLEC7A, TLR2, TLR7, FCN1, CLEC4E, MARCO, TLR4	10	geneontology_Molecular_Function	0.017301	Up
GO:0038024	cargo receptor activity	16/578	73/18352	7.63e-10	2.8e-08	2.2e-08	ITGB2, ITGAM, STAB1, APOBR, CD163, CD5, FOLR2, CD163L1, CXCL16, CD6, MSR1, MRC1, DAB2, MARCO, SCARA5, PRG4	16	geneontology_Molecular_Function	0.0276817	Up
GO:0005539	glycosaminoglycan binding	28/578	232/18352	1.19e-09	4.1e-08	3.23e-08	NLRP3, STAB1, PTPRC, TLR2, SELL, ADA2, CCL8, CCL23, JCHAIN, CXCL10, CXCL11, PLA2G2D, CXCL13, CLEC3B, LXN, APOE, SPOCK2, DCN, LYVE1, TNXB, CCN5, PCOLCE, TNFAIP6, ADAMTS5, PLA2G5, CFH, TREM2, CTSG	28	geneontology_Molecular_Function	0.0484429	Up
GO:0023023	MHC protein complex binding	10/578	25/18352	1.9e-09	6.19e-08	4.87e-08	LILRB1, HLA-DMB, LILRB2, HLA-DMA, CD74, HLA-DRB1, HLA-DRA, CD8A, HLA-DOA, HLA-DOB	10	geneontology_Molecular_Function	0.017301	Up
GO:0042277	peptide binding	32/578	308/18352	3.47e-09	1.07e-07	8.43e-08	HLA-E, ITGB2, ITGAM, LILRB2, C1QA, CD14, CD74, TLR2, HLA-DPB1, HLA-DRB1, EBI3, HLA-DRA, HLA-B, HLA-DPA1, MSR1, HLA-C, CD209, FCGR2B, HLA-DQA1, HLA-DRB5, HLA-DQB1, HLA-F, MARCO, TLR4, CST3, ANPEP, RAMP3, APOE, PTGES, CD1C, GPR1, TREM2	32	geneontology_Molecular_Function	0.0553633	Up
GO:0033218	amide binding	35/578	381/18352	1.59e-08	4.51e-07	3.55e-07	HLA-E, ITGB2, ITGAM, LILRB2, C1QA, CD14, CD74, TLR2, HLA-DPB1, HLA-DRB1, EBI3, HLA-DRA, FOLR2, HLA-B, HLA-DPA1, CD300LF, MSR1, HLA-C, CD209, FCGR2B, HLA-DQA1, HLA-DRB5, PLTP, HLA-DQB1, HLA-F, MARCO, TLR4, CST3, ANPEP, RAMP3, APOE, PTGES, CD1C, GPR1, TREM2	35	geneontology_Molecular_Function	0.0605536	Up
GO:0003823	antigen binding	22/578	168/18352	1.61e-08	4.51e-07	3.55e-07	HLA-E, LILRB4, CD48, SLAMF1, HLA-DPB1, HLA-DRB1, HLA-DRA, HLA-B, HLA-DPA1, HLA-C, CD209, CD40, JCHAIN, FCN1, HLA-DQA1, HLA-DRB5, HLA-DQB1, HLA-F, IL7R, IGLL5, CD1C, LAG3	22	geneontology_Molecular_Function	0.0380623	Up
GO:0042287	MHC protein binding	11/578	42/18352	4.85e-08	1.29e-06	1.02e-06	HLA-E, LILRB1, CD4, PILRA, LILRB2, MARCHF1, CD8B, CLEC7A, CD74, CD8A, LAG3	11	geneontology_Molecular_Function	0.0190311	Up
GO:0045028	G protein-coupled purinergic nucleotide receptor activity	7/578	14/18352	8.4e-08	2.14e-06	1.69e-06	PTAFR, P2RY13, P2RY8, GPR34, P2RY6, P2RY10, GPR171	7	geneontology_Molecular_Function	0.0121107	Up
GO:0001540	amyloid-beta binding	14/578	77/18352	1.09e-07	2.67e-06	2.1e-06	ITGB2, ITGAM, LILRB2, C1QA, CD74, TLR2, MSR1, FCGR2B, MARCO, TLR4, CST3, RAMP3, APOE, TREM2	14	geneontology_Molecular_Function	0.0242215	Up
GO:0023026	MHC class II protein complex binding	7/578	16/18352	2.65e-07	6.22e-06	4.9e-06	HLA-DMB, HLA-DMA, CD74, HLA-DRB1, HLA-DRA, HLA-DOA, HLA-DOB	7	geneontology_Molecular_Function	0.0121107	Up
GO:0019864	IgG binding	6/578	11/18352	3.84e-07	8.67e-06	6.83e-06	FCGR1B, FCER1G, FCGR1A, FCGR3A, FCGR2A, FCGR2B	6	geneontology_Molecular_Function	0.0103806	Up
GO:0019865	immunoglobulin binding	8/578	24/18352	4.34e-07	9.11e-06	7.17e-06	CD4, FCGR1B, FCER1G, FCGR1A, FCGR3A, FCGR2A, FCGR2B, JCHAIN	8	geneontology_Molecular_Function	0.0138408	Up
GO:0019957	C-C chemokine binding	8/578	24/18352	4.34e-07	9.11e-06	7.17e-06	CXCR3, CCRL2, CCR5, CCR1, CXCR6, CCR2, CCR7, ACKR1	8	geneontology_Molecular_Function	0.0138408	Up
GO:0019956	chemokine binding	9/578	33/18352	5.62e-07	1.14e-05	8.96e-06	CXCR3, CCRL2, CCR5, CCR1, CXCR6, CCR2, CCR7, ACKR1, PDPN	9	geneontology_Molecular_Function	0.0155709	Up
GO:0004875	complement receptor activity	6/578	12/18352	7.48e-07	1.46e-05	1.15e-05	C3AR1, FPR1, CR1, FPR3, CMKLR1, C5AR1	6	geneontology_Molecular_Function	0.0103806	Up
GO:0001637	G protein-coupled chemoattractant receptor activity	8/578	26/18352	8.73e-07	1.6e-05	1.26e-05	CXCR3, CCRL2, CCR5, CCR1, CXCR6, CCR2, CCR7, CMKLR1	8	geneontology_Molecular_Function	0.0138408	Up
GO:0004950	chemokine receptor activity	8/578	26/18352	8.73e-07	1.6e-05	1.26e-05	CXCR3, CCRL2, CCR5, CCR1, CXCR6, CCR2, CCR7, CMKLR1	8	geneontology_Molecular_Function	0.0138408	Up
GO:0005044	scavenger receptor activity	10/578	47/18352	1.61e-06	2.78e-05	2.19e-05	STAB1, CD163, CD5, CD163L1, CXCL16, CD6, MSR1, MARCO, SCARA5, PRG4	10	geneontology_Molecular_Function	0.017301	Up
GO:0004252	serine-type endopeptidase activity	19/578	169/18352	1.66e-06	2.78e-05	2.19e-05	GZMA, CTSC, GZMK, GZMH, GZMM, ST14, CFD, C2, GZMB, C1S, C1R, PLAU, HTRA3, CFB, CTSG, TPSAB1, MMP2, TPSB2, MMP9	19	geneontology_Molecular_Function	0.032872	Up
GO:0008201	heparin binding	19/578	169/18352	1.66e-06	2.78e-05	2.19e-05	PTPRC, SELL, ADA2, CCL8, CCL23, CXCL10, CXCL11, PLA2G2D, CXCL13, CLEC3B, LXN, APOE, TNXB, CCN5, PCOLCE, ADAMTS5, PLA2G5, CFH, CTSG	19	geneontology_Molecular_Function	0.032872	Up
GO:0008236	serine-type peptidase activity	20/578	187/18352	1.95e-06	3.18e-05	2.5e-05	GZMA, CTSC, GZMK, GZMH, GZMM, CPVL, ST14, CFD, C2, GZMB, C1S, C1R, PLAU, HTRA3, CFB, CTSG, TPSAB1, MMP2, TPSB2, MMP9	20	geneontology_Molecular_Function	0.0346021	Up
GO:0001614	purinergic nucleotide receptor activity	7/578	21/18352	2.35e-06	3.53e-05	2.78e-05	PTAFR, P2RY13, P2RY8, GPR34, P2RY6, P2RY10, GPR171	7	geneontology_Molecular_Function	0.0121107	Up
GO:0001848	complement binding	7/578	21/18352	2.35e-06	3.53e-05	2.78e-05	ITGB2, ITGAM, VSIG4, CR1, C5AR1, CFB, PTX3	7	geneontology_Molecular_Function	0.0121107	Up
GO:0016502	nucleotide receptor activity	7/578	21/18352	2.35e-06	3.53e-05	2.78e-05	PTAFR, P2RY13, P2RY8, GPR34, P2RY6, P2RY10, GPR171	7	geneontology_Molecular_Function	0.0121107	Up
GO:0017171	serine hydrolase activity	20/578	191/18352	2.71e-06	3.97e-05	3.13e-05	GZMA, CTSC, GZMK, GZMH, GZMM, CPVL, ST14, CFD, C2, GZMB, C1S, C1R, PLAU, HTRA3, CFB, CTSG, TPSAB1, MMP2, TPSB2, MMP9	20	geneontology_Molecular_Function	0.0346021	Up
GO:0001618	virus receptor activity	12/578	74/18352	3.14e-06	4.39e-05	3.46e-05	SELPLG, CD4, CD86, CCR5, SLAMF1, CR1, MRC1, CD209, ANPEP, CLEC4G, ICAM1, CD55	12	geneontology_Molecular_Function	0.0207612	Up
GO:0140272	exogenous protein binding	12/578	74/18352	3.14e-06	4.39e-05	3.46e-05	SELPLG, CD4, CD86, CCR5, SLAMF1, CR1, MRC1, CD209, ANPEP, CLEC4G, ICAM1, CD55	12	geneontology_Molecular_Function	0.0207612	Up
GO:0033691	sialic acid binding	7/578	22/18352	3.35e-06	4.57e-05	3.6e-05	CD33, SIGLEC7, SIGLEC9, SIGLEC14, SIGLEC11, SIGLEC10, FCN1	7	geneontology_Molecular_Function	0.0121107	Up
GO:0061134	peptidase regulator activity	22/578	229/18352	3.65e-06	4.86e-05	3.83e-05	CTSC, CASP1, VSIR, CD27, CST7, PYCARD, SERPINA1, C3, SERPING1, RENBP, CSTA, RARRES1, CST3, LXN, BST2, SPOCK2, TFPI, PI16, PCOLCE, SLPI, SERPINE1, PI3	22	geneontology_Molecular_Function	0.0380623	Up
GO:0042169	SH2 domain binding	9/578	41/18352	4.08e-06	5.22e-05	4.11e-05	PTPN6, LILRB1, SYK, LCK, SKAP1, LAT2, SLAMF1, SIT1, SIGLEC10	9	geneontology_Molecular_Function	0.0155709	Up
GO:0004175	endopeptidase activity	33/578	440/18352	4.09e-06	5.22e-05	4.11e-05	CTSS, PSMB10, GZMA, CASP4, CTSW, CTSC, GZMK, CASP1, GZMH, ADAM28, GZMM, PYCARD, CTSZ, LGMN, ST14, CFD, C2, GZMB, C1S, C1R, PSMB9, ADAMDEC1, PLAU, HTRA3, MMP19, CFB, ADAMTS2, ADAMTS5, CTSG, TPSAB1, MMP2, TPSB2, MMP9	33	geneontology_Molecular_Function	0.0570934	Up
GO:0016493	C-C chemokine receptor activity	7/578	23/18352	4.68e-06	5.85e-05	4.6e-05	CXCR3, CCRL2, CCR5, CCR1, CXCR6, CCR2, CCR7	7	geneontology_Molecular_Function	0.0121107	Up
GO:0004715	non-membrane spanning protein tyrosine kinase activity	9/578	46/18352	1.11e-05	0.000136	0.000107	HCK, BTK, SYK, SLA, LCK, FGR, ZAP70, LYN, JAK3	9	geneontology_Molecular_Function	0.0155709	Up
GO:0050786	RAGE receptor binding	5/578	11/18352	1.2e-05	0.000144	0.000113	FPR1, S100A9, S100A4, S100A8, S100B	5	geneontology_Molecular_Function	0.00865052	Up
GO:0045236	CXCR chemokine receptor binding	6/578	18/18352	1.28e-05	0.00015	0.000118	CXCL9, CXCL10, CXCL11, CXCL13, CXCL1, CXCL12	6	geneontology_Molecular_Function	0.0103806	Up
GO:0035325	Toll-like receptor binding	5/578	12/18352	2.01e-05	0.000231	0.000182	SYK, UNC93B1, TLR2, S100A9, S100A8	5	geneontology_Molecular_Function	0.00865052	Up
GO:0016175	superoxide-generating NAD(P)H oxidase activity	5/578	13/18352	3.18e-05	0.000359	0.000282	NCF1, NCF4, CYBA, CYBB, NCF2	5	geneontology_Molecular_Function	0.00865052	Up
GO:0005164	tumor necrosis factor receptor binding	7/578	31/18352	4.03e-05	0.000447	0.000352	LTB, TNFSF13B, TNFSF8, FASLG, TNFSF10, TNFSF9, CD70	7	geneontology_Molecular_Function	0.0121107	Up
GO:0001784	phosphotyrosine residue binding	8/578	42/18352	4.23e-05	0.00046	0.000362	PTPN6, VAV1, HCK, SYK, LCK, SAMSN1, FGR, ZAP70	8	geneontology_Molecular_Function	0.0138408	Up
GO:0042288	MHC class I protein binding	6/578	22/18352	4.61e-05	0.000492	0.000387	HLA-E, LILRB1, PILRA, LILRB2, CD8B, CD8A	6	geneontology_Molecular_Function	0.0103806	Up
GO:0001846	opsonin binding	5/578	15/18352	7.04e-05	0.000738	0.000581	ITGB2, ITGAM, VSIG4, CR1, PTX3	5	geneontology_Molecular_Function	0.00865052	Up
GO:0019838	growth factor binding	14/578	136/18352	0.000101	0.00102	0.000805	IL10RA, IL2RG, RHBDF2, NRROS, IL2RA, IL2RB, CXCL13, ACVRL1, IGFBP6, VASN, HTRA3, CCN5, LRRC32, SRPX2	14	geneontology_Molecular_Function	0.0242215	Up
GO:0030247	polysaccharide binding	6/578	25/18352	0.000101	0.00102	0.000805	CLEC7A, HLA-DRB1, HLA-DRA, CLEC4G, PTX3, PRG4	6	geneontology_Molecular_Function	0.0103806	Up
GO:0030414	peptidase inhibitor activity	17/578	189/18352	0.000104	0.00104	0.000816	CD27, CST7, SERPINA1, C3, SERPING1, RENBP, CSTA, RARRES1, CST3, LXN, BST2, SPOCK2, TFPI, PI16, SLPI, SERPINE1, PI3	17	geneontology_Molecular_Function	0.0294118	Up
GO:0015026	coreceptor activity	8/578	48/18352	0.000115	0.00112	0.000882	CD4, CD86, CD8B, CCR5, CXCR6, CD8A, CD28, RAMP3	8	geneontology_Molecular_Function	0.0138408	Up
GO:0061135	endopeptidase regulator activity	17/578	192/18352	0.000126	0.00122	0.000957	VSIR, CD27, CST7, SERPINA1, C3, SERPING1, RENBP, CSTA, RARRES1, CST3, LXN, BST2, SPOCK2, TFPI, SLPI, SERPINE1, PI3	17	geneontology_Molecular_Function	0.0294118	Up
GO:0005178	integrin binding	14/578	144/18352	0.000186	0.00176	0.00138	FERMT3, JAML, ITGB2, SYK, ITGAM, ICAM3, LYN, LCP1, ITGAX, ICAM1, TNXB, CCN5, CXCL12, ADAMTS5	14	geneontology_Molecular_Function	0.0242215	Up
GO:0004866	endopeptidase inhibitor activity	16/578	183/18352	0.000229	0.00213	0.00168	CD27, CST7, SERPINA1, C3, SERPING1, RENBP, CSTA, RARRES1, CST3, LXN, BST2, SPOCK2, TFPI, SLPI, SERPINE1, PI3	16	geneontology_Molecular_Function	0.0276817	Up
GO:0045309	protein phosphorylated amino acid binding	8/578	53/18352	0.000234	0.00215	0.00169	PTPN6, VAV1, HCK, SYK, LCK, SAMSN1, FGR, ZAP70	8	geneontology_Molecular_Function	0.0138408	Up
GO:0050664	oxidoreductase activity, acting on NAD(P)H, oxygen as acceptor	5/578	19/18352	0.000245	0.00222	0.00174	NCF1, NCF4, CYBA, CYBB, NCF2	5	geneontology_Molecular_Function	0.00865052	Up
GO:1901681	sulfur compound binding	20/578	262/18352	0.000253	0.00225	0.00177	PTPRC, SELL, ADA2, CCL8, CCL23, CXCL10, CXCL11, PLA2G2D, CXCL13, CLEC3B, LXN, APOE, PTGES, TNXB, CCN5, PCOLCE, ADAMTS5, PLA2G5, CFH, CTSG	20	geneontology_Molecular_Function	0.0346021	Up
GO:0005201	extracellular matrix structural constituent	15/578	169/18352	0.000302	0.00265	0.00209	CD4, FBLN2, PODN, DCN, EMILIN2, TNXB, FGL2, LUM, EFEMP1, PCOLCE, PRG4, MXRA5, SRPX2, ECM1, DPT	15	geneontology_Molecular_Function	0.0259516	Up
GO:0050840	extracellular matrix binding	8/578	57/18352	0.000391	0.00338	0.00266	CTSS, FBLN2, SPOCK2, DCN, CD248, NTN4, ADAMTS5, ECM1	8	geneontology_Molecular_Function	0.0138408	Up
GO:0001530	lipopolysaccharide binding	6/578	33/18352	0.00051	0.00434	0.00342	PTAFR, CD14, TLR2, CD6, TLR4, TREM2	6	geneontology_Molecular_Function	0.0103806	Up
GO:0032813	tumor necrosis factor receptor superfamily binding	7/578	48/18352	0.000711	0.00596	0.0047	LTB, TNFSF13B, TNFSF8, FASLG, TNFSF10, TNFSF9, CD70	7	geneontology_Molecular_Function	0.0121107	Up
GO:0008528	G protein-coupled peptide receptor activity	13/578	148/18352	0.000825	0.00675	0.00531	CXCR3, CCRL2, CCR5, CCR1, CXCR6, FPR1, CCR2, CCR7, FPR3, GPR84, CMKLR1, RAMP3, APLNR	13	geneontology_Molecular_Function	0.0224913	Up
GO:0043394	proteoglycan binding	6/578	36/18352	0.000828	0.00675	0.00531	CTSS, PTPRC, ADA2, PLA2G2D, APOE, CFH	6	geneontology_Molecular_Function	0.0103806	Up
GO:0036041	long-chain fatty acid binding	4/578	15/18352	0.00101	0.0081	0.00638	ALOX5AP, S100A9, S100A8, FABP4	4	geneontology_Molecular_Function	0.00692042	Up
GO:0001653	peptide receptor activity	13/578	152/18352	0.00106	0.00839	0.0066	CXCR3, CCRL2, CCR5, CCR1, CXCR6, FPR1, CCR2, CCR7, FPR3, GPR84, CMKLR1, RAMP3, APLNR	13	geneontology_Molecular_Function	0.0224913	Up
GO:0031406	carboxylic acid binding	16/578	212/18352	0.00115	0.00899	0.00708	CD33, STAB1, SIGLEC7, SIGLEC9, SIGLEC14, FOLR2, ALOX5AP, SIGLEC11, S100A9, SIGLEC10, FCN1, S100A8, APOC1, LYVE1, TNFAIP6, FABP4	16	geneontology_Molecular_Function	0.0276817	Up
GO:0005543	phospholipid binding	27/578	454/18352	0.00126	0.00961	0.00757	NCF1, DENND1C, BIN2, SNX20, PTAFR, FGD2, ARHGAP9, NCF4, BTK, ADAP2, DAPP1, CD300A, MYO1G, KCNQ1, ADAP1, PLEK, CD300LF, CETP, JCHAIN, PLTP, PLA2G2D, PLA2G2A, APOC1, APOE, ANXA1, PLA2G5, TREM2	27	geneontology_Molecular_Function	0.0467128	Up
GO:0005547	phosphatidylinositol-3,4,5-trisphosphate binding	6/578	39/18352	0.00128	0.00961	0.00757	ARHGAP9, BTK, ADAP2, DAPP1, MYO1G, ADAP1	6	geneontology_Molecular_Function	0.0103806	Up
GO:0008191	metalloendopeptidase inhibitor activity	4/578	16/18352	0.00131	0.00961	0.00757	RARRES1, LXN, BST2, SPOCK2	4	geneontology_Molecular_Function	0.00692042	Up
GO:0043395	heparan sulfate proteoglycan binding	4/578	16/18352	0.00131	0.00961	0.00757	PTPRC, PLA2G2D, APOE, CFH	4	geneontology_Molecular_Function	0.00692042	Up
GO:0050700	CARD domain binding	4/578	16/18352	0.00131	0.00961	0.00757	CARD9, CASP4, CASP1, CARD11	4	geneontology_Molecular_Function	0.00692042	Up
GO:0051219	phosphoprotein binding	9/578	85/18352	0.00141	0.0102	0.00802	PTPN6, VAV1, HCK, SYK, LCK, SAMSN1, FGR, ZAP70, LYN	9	geneontology_Molecular_Function	0.0155709	Up
GO:0048029	monosaccharide binding	8/578	69/18352	0.00142	0.0102	0.00802	LGALS9, HK3, CLEC4A, FBP1, MRC1, CD209, FUOM, SLC2A5	8	geneontology_Molecular_Function	0.0138408	Up
GO:0030169	low-density lipoprotein particle binding	4/578	17/18352	0.00167	0.0118	0.0093	STAB1, MSR1, PLTP, TREM2	4	geneontology_Molecular_Function	0.00692042	Up
GO:0030695	GTPase regulator activity	20/578	307/18352	0.00182	0.0127	0.01	ARHGAP30, GPSM3, WAS, RASAL3, ARHGAP9, ARHGAP45, ADAP2, DOCK2, ARHGAP4, TBC1D10C, RHOH, ADAP1, NCKAP1L, RGS18, ACAP1, ARHGAP15, TAGAP, CDC42EP2, RGS1, ALDH1A1	20	geneontology_Molecular_Function	0.0346021	Up
GO:0043177	organic acid binding	16/578	224/18352	0.00203	0.014	0.011	CD33, STAB1, SIGLEC7, SIGLEC9, SIGLEC14, FOLR2, ALOX5AP, SIGLEC11, S100A9, SIGLEC10, FCN1, S100A8, APOC1, LYVE1, TNFAIP6, FABP4	16	geneontology_Molecular_Function	0.0276817	Up
GO:0042834	peptidoglycan binding	4/578	18/18352	0.0021	0.0143	0.0113	NLRP3, TLR2, JCHAIN, TREM2	4	geneontology_Molecular_Function	0.00692042	Up
GO:0043325	phosphatidylinositol-3,4-bisphosphate binding	5/578	30/18352	0.00226	0.0152	0.012	NCF1, ADAP2, DAPP1, MYO1G, PLEK	5	geneontology_Molecular_Function	0.00865052	Up
GO:0004857	enzyme inhibitor activity	23/578	383/18352	0.00248	0.0165	0.013	GMFG, RHOH, CD27, CST7, SERPINA1, C3, SERPING1, PDE6G, RENBP, CSTA, RARRES1, WARS1, CST3, LXN, APOC1, BST2, ANXA1, SPOCK2, TFPI, PI16, SLPI, SERPINE1, PI3	23	geneontology_Molecular_Function	0.0397924	Up
GO:0017124	SH3 domain binding	11/578	131/18352	0.00289	0.0191	0.015	NCF1, PTPN6, WAS, INPP5D, CYBA, HCLS1, SKAP1, ABI3, CD3E, LYN, SH2D2A	11	geneontology_Molecular_Function	0.0190311	Up
GO:0016176	superoxide-generating NADPH oxidase activator activity	3/578	10/18352	0.00316	0.0204	0.016	NCF1, NCF4, NCF2	3	geneontology_Molecular_Function	0.00519031	Up
GO:0071723	lipopeptide binding	3/578	10/18352	0.00316	0.0204	0.016	CD14, TLR2, CD1C	3	geneontology_Molecular_Function	0.00519031	Up
GO:0004713	protein tyrosine kinase activity	11/578	135/18352	0.00365	0.0233	0.0183	HCK, BTK, SYK, SLA, LCK, CSF1R, FGR, ZAP70, LYN, JAK3, EFEMP1	11	geneontology_Molecular_Function	0.0190311	Up
GO:0071813	lipoprotein particle binding	5/578	34/18352	0.00398	0.0248	0.0196	STAB1, MSR1, PLTP, APOE, TREM2	5	geneontology_Molecular_Function	0.00865052	Up
GO:0071814	protein-lipid complex binding	5/578	34/18352	0.00398	0.0248	0.0196	STAB1, MSR1, PLTP, APOE, TREM2	5	geneontology_Molecular_Function	0.00865052	Up
GO:1901981	phosphatidylinositol phosphate binding	13/578	179/18352	0.00447	0.0276	0.0218	NCF1, DENND1C, SNX20, FGD2, ARHGAP9, NCF4, BTK, ADAP2, DAPP1, MYO1G, KCNQ1, ADAP1, PLEK	13	geneontology_Molecular_Function	0.0224913	Up
GO:0030021	extracellular matrix structural constituent conferring compression resistance	4/578	22/18352	0.00453	0.0277	0.0218	PODN, DCN, LUM, PRG4	4	geneontology_Molecular_Function	0.00692042	Up
GO:0050431	transforming growth factor beta binding	4/578	23/18352	0.00535	0.0324	0.0255	NRROS, ACVRL1, VASN, LRRC32	4	geneontology_Molecular_Function	0.00692042	Up
GO:0016004	phospholipase activator activity	3/578	12/18352	0.00553	0.0328	0.0258	CCL5, CCL3, CCL8	3	geneontology_Molecular_Function	0.00519031	Up
GO:0046790	virion binding	3/578	12/18352	0.00553	0.0328	0.0258	SIGLEC1, CD209, PTX3	3	geneontology_Molecular_Function	0.00519031	Up
GO:0004620	phospholipase activity	9/578	105/18352	0.00591	0.0347	0.0273	PLCB2, CCR5, CCL5, CCR1, PLA2G2D, PLA2G2A, HMOX1, PLAAT4, PLA2G5	9	geneontology_Molecular_Function	0.0155709	Up
GO:0005096	GTPase activator activity	17/578	275/18352	0.00651	0.0379	0.0298	ARHGAP30, RASAL3, ARHGAP9, ARHGAP45, ADAP2, DOCK2, ARHGAP4, TBC1D10C, ADAP1, NCKAP1L, RGS18, ACAP1, ARHGAP15, TAGAP, CDC42EP2, RGS1, ALDH1A1	17	geneontology_Molecular_Function	0.0294118	Up
GO:0005504	fatty acid binding	5/578	39/18352	0.00724	0.0415	0.0327	ALOX5AP, S100A9, S100A8, APOC1, FABP4	5	geneontology_Molecular_Function	0.00865052	Up
GO:0046625	sphingolipid binding	4/578	25/18352	0.00728	0.0415	0.0327	SELL, LYN, CD300LF, PLTP	4	geneontology_Molecular_Function	0.00692042	Up
GO:0060589	nucleoside-triphosphatase regulator activity	20/578	348/18352	0.00739	0.0417	0.0328	ARHGAP30, GPSM3, WAS, RASAL3, ARHGAP9, ARHGAP45, ADAP2, DOCK2, ARHGAP4, TBC1D10C, RHOH, ADAP1, NCKAP1L, RGS18, ACAP1, ARHGAP15, TAGAP, CDC42EP2, RGS1, ALDH1A1	20	geneontology_Molecular_Function	0.0346021	Up
GO:0048365	Rac GTPase binding	7/578	73/18352	0.00803	0.0447	0.0352	VAV1, WAS, DOCK2, ARHGAP4, FMNL1, NCKAP1L, NCF2	7	geneontology_Molecular_Function	0.0121107	Up
GO:0016504	peptidase activator activity	5/578	40/18352	0.00806	0.0447	0.0352	CTSC, CASP1, VSIR, PYCARD, PCOLCE	5	geneontology_Molecular_Function	0.00865052	Up
GO:0004435	phosphatidylinositol phospholipase C activity	4/578	26/18352	0.00839	0.0452	0.0356	PLCB2, CCR5, CCL5, CCR1	4	geneontology_Molecular_Function	0.00692042	Up
GO:0102567	phospholipase A2 activity (consuming 1,2-dipalmitoylphosphatidylcholine)	4/578	26/18352	0.00839	0.0452	0.0356	PLA2G2D, PLA2G2A, PLAAT4, PLA2G5	4	geneontology_Molecular_Function	0.00692042	Up
GO:0102568	phospholipase A2 activity consuming 1,2-dioleoylphosphatidylethanolamine)	4/578	26/18352	0.00839	0.0452	0.0356	PLA2G2D, PLA2G2A, PLAAT4, PLA2G5	4	geneontology_Molecular_Function	0.00692042	Up
GO:0060229	lipase activator activity	3/578	14/18352	0.00873	0.0466	0.0367	CCL5, CCL3, CCL8	3	geneontology_Molecular_Function	0.00519031	Up
GO:0097153	cysteine-type endopeptidase activity involved in apoptotic process	3/578	15/18352	0.0107	0.0564	0.0444	CASP4, CASP1, PYCARD	3	geneontology_Molecular_Function	0.00519031	Up
GO:0004629	phospholipase C activity	4/578	28/18352	0.0109	0.0573	0.0451	PLCB2, CCR5, CCL5, CCR1	4	geneontology_Molecular_Function	0.00692042	Up
GO:0031210	phosphatidylcholine binding	4/578	29/18352	0.0124	0.0632	0.0498	CETP, JCHAIN, PLTP, APOC1	4	geneontology_Molecular_Function	0.00692042	Up
GO:0050997	quaternary ammonium group binding	4/578	29/18352	0.0124	0.0632	0.0498	CETP, JCHAIN, PLTP, APOC1	4	geneontology_Molecular_Function	0.00692042	Up
GO:0003953	NAD+ nucleosidase activity	3/578	16/18352	0.0128	0.0632	0.0498	TLR2, CD38, TLR4	3	geneontology_Molecular_Function	0.00519031	Up
GO:0030228	lipoprotein particle receptor activity	3/578	16/18352	0.0128	0.0632	0.0498	STAB1, APOBR, CXCL16	3	geneontology_Molecular_Function	0.00519031	Up
GO:0047498	calcium-dependent phospholipase A2 activity	3/578	16/18352	0.0128	0.0632	0.0498	PLA2G2D, PLA2G2A, PLA2G5	3	geneontology_Molecular_Function	0.00519031	Up
GO:0050135	NAD(P)+ nucleosidase activity	3/578	16/18352	0.0128	0.0632	0.0498	TLR2, CD38, TLR4	3	geneontology_Molecular_Function	0.00519031	Up
GO:0061809	NAD+ nucleotidase, cyclic ADP-ribose generating	3/578	16/18352	0.0128	0.0632	0.0498	TLR2, CD38, TLR4	3	geneontology_Molecular_Function	0.00519031	Up
hsa04270	Vascular smooth muscle contraction	11/87	132/8009	1.55e-07	2.97e-05	2.41e-05	CACNA1C, ITPR1, ADCY5, EDNRA, MYLK, PPP1R12B, RAMP1, MYH11, KCNMB1, PPP1R14A, ACTG2	11	pathway_KEGG	0.126437	Down
hsa05414	Dilated cardiomyopathy (DCM)	8/87	96/8009	8.53e-06	0.000819	0.000664	CACNA1C, ITGA8, ADCY5, CACNG4, TPM2, DES, SGCA, PLN	8	pathway_KEGG	0.091954	Down
hsa05410	Hypertrophic cardiomyopathy (HCM)	7/87	90/8009	5.04e-05	0.00322	0.00262	CACNA1C, ITGA8, PRKAA2, CACNG4, TPM2, DES, SGCA	7	pathway_KEGG	0.0804598	Down
hsa04921	Oxytocin signaling pathway	8/87	153/8009	0.000241	0.0111	0.00902	CACNA1C, ITPR1, PRKAA2, ADCY5, MYLK, CACNG4, GNAO1, PPP1R12B	8	pathway_KEGG	0.091954	Down
hsa04510	Focal adhesion	9/87	199/8009	0.000289	0.0111	0.00902	COL4A5, ITGA8, MAPK10, COL4A6, RAC3, ACTN1, MYLK, PPP1R12B, TNC	9	pathway_KEGG	0.103448	Down
hsa04512	ECM-receptor interaction	6/87	88/8009	0.000367	0.0117	0.00953	COL4A5, ITGA8, SV2A, COL4A6, NPNT, TNC	6	pathway_KEGG	0.0689655	Down
hsa04022	cGMP-PKG signaling pathway	8/87	167/8009	0.000436	0.0119	0.00969	CACNA1C, ITPR1, ADCY5, EDNRA, PDE3A, MYLK, KCNMB1, PLN	8	pathway_KEGG	0.091954	Down
hsa04728	Dopaminergic synapse	7/87	132/8009	0.00055	0.0132	0.0107	CACNA1C, ITPR1, MAPK10, ADCY5, GNG4, GNAO1, MAOB	7	pathway_KEGG	0.0804598	Down
hsa00910	Nitrogen metabolism	3/87	17/8009	0.000754	0.0161	0.0131	CA9, CA12, CA3	3	pathway_KEGG	0.0344828	Down
hsa04924	Renin secretion	5/87	69/8009	0.000877	0.0168	0.0137	CACNA1C, ITPR1, ADCY5, EDNRA, PDE3A	5	pathway_KEGG	0.0574713	Down
hsa04725	Cholinergic synapse	6/87	112/8009	0.00132	0.0207	0.0168	CACNA1C, ITPR1, ADCY5, GNG4, KCNQ4, GNAO1	6	pathway_KEGG	0.0689655	Down
hsa05412	Arrhythmogenic right ventricular cardiomyopathy (ARVC)	5/87	77/8009	0.00144	0.0207	0.0168	CACNA1C, ITGA8, CACNG4, DES, SGCA	5	pathway_KEGG	0.0574713	Down
hsa04724	Glutamatergic synapse	6/87	114/8009	0.00144	0.0207	0.0168	CACNA1C, ITPR1, GRIK5, ADCY5, GNG4, GNAO1	6	pathway_KEGG	0.0689655	Down
hsa04726	Serotonergic synapse	6/87	115/8009	0.00151	0.0207	0.0168	CACNA1C, ITPR1, ADCY5, GNG4, GNAO1, MAOB	6	pathway_KEGG	0.0689655	Down
hsa04024	cAMP signaling pathway	8/87	216/8009	0.00231	0.0282	0.0229	CACNA1C, MAPK10, ADCY5, EDNRA, PDE3A, GABBR2, RAC3, PLN	8	pathway_KEGG	0.091954	Down
hsa04911	Insulin secretion	5/87	86/8009	0.00235	0.0282	0.0229	CACNA1C, RIMS2, ADCY5, SNAP25, KCNMB1	5	pathway_KEGG	0.0574713	Down
hsa04926	Relaxin signaling pathway	6/87	129/8009	0.0027	0.0292	0.0237	COL4A5, MAPK10, ADCY5, COL4A6, GNG4, GNAO1	6	pathway_KEGG	0.0689655	Down
hsa04727	GABAergic synapse	5/87	89/8009	0.00273	0.0292	0.0237	CACNA1C, ADCY5, GABBR2, GNG4, GNAO1	5	pathway_KEGG	0.0574713	Down
hsa05032	Morphine addiction	5/87	91/8009	0.00301	0.0304	0.0247	ADCY5, PDE3A, GABBR2, GNG4, GNAO1	5	pathway_KEGG	0.0574713	Down
hsa04360	Axon guidance	7/87	181/8009	0.00342	0.0328	0.0267	SEMA6A, DPYSL5, UNC5D, EPHB1, RAC3, PLXNA4, NTN1	7	pathway_KEGG	0.0804598	Down
hsa04910	Insulin signaling pathway	6/87	137/8009	0.00365	0.0333	0.0271	PHKA1, MAPK10, PRKAA2, PTPRF, SORBS1, PPP1R3C	6	pathway_KEGG	0.0689655	Down
hsa04713	Circadian entrainment	5/87	97/8009	0.00397	0.0346	0.0281	CACNA1C, ITPR1, ADCY5, GNG4, GNAO1	5	pathway_KEGG	0.0574713	Down
hsa04020	Calcium signaling pathway	7/87	193/8009	0.00487	0.0406	0.033	CACNA1C, PHKA1, ITPR1, EDNRA, MYLK, PLN, CASQ2	7	pathway_KEGG	0.0804598	Down
hsa04927	Cortisol synthesis and secretion	4/87	65/8009	0.00531	0.0408	0.0331	CACNA1C, ITPR1, ADCY5, PBX1	4	pathway_KEGG	0.045977	Down
hsa04723	Retrograde endocannabinoid signaling	6/87	148/8009	0.00532	0.0408	0.0331	CACNA1C, ITPR1, MAPK10, ADCY5, GNG4, GNAO1	6	pathway_KEGG	0.0689655	Down
GO:0003012	muscle system process	29/240	467/18866	1.84e-12	4.96e-09	4.24e-09	CACNA1C, SLC6A8, KCNH2, EDNRA, SLMAP, SORBS1, CKMT2, TMOD1, HEY2, MYOCD, SYNM, HAND2, MYOC, NPNT, FBXO32, MYLK, GNAO1, PPP1R12B, NKX2-5, MYH11, CNN1, STAC2, TPM2, DES, SGCA, ACTG2, LMOD1, PLN, CASQ2	29	geneontology_Biological_Process	0.120833	Down
GO:0006936	muscle contraction	25/240	362/18866	6.96e-12	9.38e-09	8.03e-09	CACNA1C, SLC6A8, KCNH2, EDNRA, SLMAP, SORBS1, CKMT2, TMOD1, MYOCD, SYNM, NPNT, MYLK, GNAO1, PPP1R12B, NKX2-5, MYH11, CNN1, STAC2, TPM2, DES, SGCA, ACTG2, LMOD1, PLN, CASQ2	25	geneontology_Biological_Process	0.104167	Down
GO:0042391	regulation of membrane potential	21/240	443/18866	2.58e-07	0.000192	0.000164	MPP2, CACNA1C, TMEM25, CNIH2, RIMS2, RIMS3, KCNH2, PTN, MLLT11, GRIK5, IGSF9B, CXADR, SLMAP, PMAIP1, TMEM108, MYOC, CACNG4, FHL1, CBLN1, PLN, CASQ2	21	geneontology_Biological_Process	0.0875	Down
GO:0007517	muscle organ development	20/240	407/18866	2.85e-07	0.000192	0.000164	FGFR2, RBM24, SPEG, SVIL, EPHB1, MEIS1, CXADR, MKX, HEY2, CHODL, MYOCD, MYLK, ITGB1BP2, NKX2-5, FHL1, SCX, JPH2, SGCA, ASB2, TAGLN	20	geneontology_Biological_Process	0.0833333	Down
GO:0060537	muscle tissue development	19/240	409/18866	1.32e-06	0.000713	0.00061	FGFR2, RBM24, ITGA8, CSRP2, SVIL, EPHB1, MEIS1, CXADR, HEY2, MYH10, MYOCD, PGM5, MYLK, NKX2-5, MYH11, SCX, JPH2, ASB2, PLN	19	geneontology_Biological_Process	0.0791667	Down
GO:0030239	myofibril assembly	8/240	67/18866	2.09e-06	0.000937	0.000801	CSRP2, TMOD1, MYH10, PGM5, NKX2-5, MYH11, LMOD1, CASQ2	8	geneontology_Biological_Process	0.0333333	Down
GO:0050808	synapse organization	18/240	433/18866	1.17e-05	0.0045	0.00385	ADGRL1, ADGRB2, PPFIA4, COL4A5, PDZRN3, C1QL1, PTN, IGSF9B, EPHB1, PTPRF, ACTN1, MYH10, LRRC4B, TMEM108, LRRN1, NTN1, CBLN1, TNC	18	geneontology_Biological_Process	0.075	Down
GO:0007411	axon guidance	14/240	284/18866	1.76e-05	0.00547	0.00468	SEMA6A, DPYSL5, CRMP1, VLDLR, PALLD, UNC5D, EPHB1, NCAM1, MYH10, NRTN, MATN2, LHX2, PLXNA4, NTN1	14	geneontology_Biological_Process	0.0583333	Down
GO:0097485	neuron projection guidance	14/240	285/18866	1.83e-05	0.00547	0.00468	SEMA6A, DPYSL5, CRMP1, VLDLR, PALLD, UNC5D, EPHB1, NCAM1, MYH10, NRTN, MATN2, LHX2, PLXNA4, NTN1	14	geneontology_Biological_Process	0.0583333	Down
GO:0014706	striated muscle tissue development	16/240	389/18866	4.1e-05	0.0104	0.00886	FGFR2, RBM24, SVIL, EPHB1, MEIS1, CXADR, HEY2, MYH10, MYOCD, PGM5, NKX2-5, MYH11, SCX, JPH2, ASB2, PLN	16	geneontology_Biological_Process	0.0666667	Down
GO:0042692	muscle cell differentiation	16/240	390/18866	4.23e-05	0.0104	0.00886	FGFR2, RBM24, ITGA8, SPEG, CSRP2, CXADR, TMOD1, HEY2, MYH10, MYOCD, PGM5, NPNT, NKX2-5, MYH11, LMOD1, CASQ2	16	geneontology_Biological_Process	0.0666667	Down
GO:0031032	actomyosin structure organization	11/240	200/18866	5.29e-05	0.0111	0.00946	CSRP2, SORBS1, TMOD1, MYH10, MYOC, PGM5, NKX2-5, MYH11, CNN1, LMOD1, CASQ2	11	geneontology_Biological_Process	0.0458333	Down
GO:0055012	ventricular cardiac muscle cell differentiation	4/240	17/18866	5.34e-05	0.0111	0.00946	HEY2, MYH10, MYOCD, NKX2-5	4	geneontology_Biological_Process	0.0166667	Down
GO:0055002	striated muscle cell development	10/240	169/18866	6.29e-05	0.0121	0.0104	CSRP2, CXADR, TMOD1, HEY2, MYH10, PGM5, NKX2-5, MYH11, LMOD1, CASQ2	10	geneontology_Biological_Process	0.0416667	Down
GO:0060485	mesenchyme development	13/240	290/18866	9.25e-05	0.0157	0.0134	DACT3, FGFR2, RBM24, SEMA6A, EDNRA, FAM83D, HEY2, IL17RD, HAND2, NRTN, NKX2-5, SCX, ACTG2	13	geneontology_Biological_Process	0.0541667	Down
GO:0010927	cellular component assembly involved in morphogenesis	8/240	112/18866	9.31e-05	0.0157	0.0134	CSRP2, TMOD1, MYH10, PGM5, NKX2-5, MYH11, LMOD1, CASQ2	8	geneontology_Biological_Process	0.0333333	Down
GO:0008016	regulation of heart contraction	12/240	256/18866	0.000113	0.0173	0.0148	CACNA1C, ITPR1, KCNH2, CXADR, HSPB7, HEY2, CACNG4, GNAO1, NKX2-5, DES, PLN, CASQ2	12	geneontology_Biological_Process	0.05	Down
GO:0031644	regulation of nervous system process	9/240	148/18866	0.000119	0.0173	0.0148	TMEM25, CNIH2, RIMS2, IGSF9B, TMEM108, TMEM98, CACNG4, CBLN1, NPTX2	9	geneontology_Biological_Process	0.0375	Down
GO:0055001	muscle cell development	10/240	183/18866	0.000122	0.0173	0.0148	CSRP2, CXADR, TMOD1, HEY2, MYH10, PGM5, NKX2-5, MYH11, LMOD1, CASQ2	10	geneontology_Biological_Process	0.0416667	Down
GO:0016202	regulation of striated muscle tissue development	9/240	153/18866	0.000153	0.0198	0.0169	FGFR2, RBM24, EPHB1, MEIS1, CXADR, HEY2, MYOCD, NKX2-5, JPH2	9	geneontology_Biological_Process	0.0375	Down
GO:0007409	axonogenesis	17/240	482/18866	0.000156	0.0198	0.0169	FGFR2, SEMA6A, DPYSL5, CRMP1, RTN4R, VLDLR, PALLD, UNC5D, EPHB1, NCAM1, MYH10, CHODL, NRTN, MATN2, LHX2, PLXNA4, NTN1	17	geneontology_Biological_Process	0.0708333	Down
GO:0051899	membrane depolarization	7/240	91/18866	0.000161	0.0198	0.0169	CACNA1C, KCNH2, MLLT11, SLMAP, MYOC, CACNG4, FHL1	7	geneontology_Biological_Process	0.0291667	Down
GO:1901861	regulation of muscle tissue development	9/240	156/18866	0.000177	0.0207	0.0177	FGFR2, RBM24, EPHB1, MEIS1, CXADR, HEY2, MYOCD, NKX2-5, JPH2	9	geneontology_Biological_Process	0.0375	Down
GO:0048634	regulation of muscle organ development	9/240	157/18866	0.000186	0.0209	0.0178	FGFR2, RBM24, EPHB1, MEIS1, CXADR, HEY2, MYOCD, NKX2-5, JPH2	9	geneontology_Biological_Process	0.0375	Down
GO:0051965	positive regulation of synapse assembly	6/240	67/18866	0.000208	0.0224	0.0192	ADGRL1, ADGRB2, EPHB1, LRRC4B, LRRN1, CBLN1	6	geneontology_Biological_Process	0.025	Down
GO:0019933	cAMP-mediated signaling	10/240	199/18866	0.000241	0.025	0.0214	ADGRL1, ADGRB2, RIMS2, MRAP2, ADCY5, PDE3A, RASD2, APLP1, RAMP1, PLN	10	geneontology_Biological_Process	0.0416667	Down
GO:1901654	response to ketone	10/240	200/18866	0.000251	0.0251	0.0214	CA9, PTN, PRKAA2, ADCY5, AR, FBXO32, HOXB13, TNC, MAOB, PLN	10	geneontology_Biological_Process	0.0416667	Down
GO:0060740	prostate gland epithelium morphogenesis	4/240	26/18866	0.000306	0.0294	0.0251	FGFR2, AR, HOXB13, TNC	4	geneontology_Biological_Process	0.0166667	Down
GO:0060047	heart contraction	12/240	287/18866	0.000325	0.0294	0.0251	CACNA1C, ITPR1, KCNH2, CXADR, HSPB7, HEY2, CACNG4, GNAO1, NKX2-5, DES, PLN, CASQ2	12	geneontology_Biological_Process	0.05	Down
GO:0055024	regulation of cardiac muscle tissue development	7/240	102/18866	0.000327	0.0294	0.0251	FGFR2, MEIS1, CXADR, HEY2, MYOCD, NKX2-5, JPH2	7	geneontology_Biological_Process	0.0291667	Down
GO:1901890	positive regulation of cell junction assembly	7/240	103/18866	0.000347	0.0302	0.0258	ADGRL1, ADGRB2, EPHB1, LRRC4B, MYOC, LRRN1, CBLN1	7	geneontology_Biological_Process	0.0291667	Down
GO:0055015	ventricular cardiac muscle cell development	3/240	12/18866	0.000411	0.0314	0.0268	HEY2, MYH10, NKX2-5	3	geneontology_Biological_Process	0.0125	Down
GO:0060742	epithelial cell differentiation involved in prostate gland development	3/240	12/18866	0.000411	0.0314	0.0268	FGFR2, AR, HOXB13	3	geneontology_Biological_Process	0.0125	Down
GO:0060512	prostate gland morphogenesis	4/240	28/18866	0.000411	0.0314	0.0268	FGFR2, AR, HOXB13, TNC	4	geneontology_Biological_Process	0.0166667	Down
GO:0051146	striated muscle cell differentiation	12/240	295/18866	0.000417	0.0314	0.0268	RBM24, CSRP2, CXADR, TMOD1, HEY2, MYH10, MYOCD, PGM5, NKX2-5, MYH11, LMOD1, CASQ2	12	geneontology_Biological_Process	0.05	Down
GO:0001654	eye development	14/240	384/18866	0.000426	0.0314	0.0268	CACNA1C, TUB, SALL2, MEIS2, DCX, PTN, SMOC1, EPHB1, MEIS1, PBX1, TMOD1, MYH10, PROM1, LHX2	14	geneontology_Biological_Process	0.0583333	Down
GO:0051963	regulation of synapse assembly	7/240	107/18866	0.000438	0.0314	0.0268	ADGRL1, ADGRB2, EPHB1, LRRC4B, LRRN1, NTN1, CBLN1	7	geneontology_Biological_Process	0.0291667	Down
GO:0003015	heart process	12/240	297/18866	0.000443	0.0314	0.0268	CACNA1C, ITPR1, KCNH2, CXADR, HSPB7, HEY2, CACNG4, GNAO1, NKX2-5, DES, PLN, CASQ2	12	geneontology_Biological_Process	0.05	Down
GO:0090257	regulation of muscle system process	11/240	256/18866	0.000457	0.0316	0.027	CACNA1C, MYOCD, HAND2, NPNT, FBXO32, PPP1R12B, NKX2-5, CNN1, SGCA, PLN, CASQ2	11	geneontology_Biological_Process	0.0458333	Down
GO:0150063	visual system development	14/240	388/18866	0.000472	0.0318	0.0272	CACNA1C, TUB, SALL2, MEIS2, DCX, PTN, SMOC1, EPHB1, MEIS1, PBX1, TMOD1, MYH10, PROM1, LHX2	14	geneontology_Biological_Process	0.0583333	Down
GO:1903522	regulation of blood circulation	12/240	303/18866	0.000529	0.0348	0.0297	CACNA1C, ITPR1, KCNH2, CXADR, HSPB7, HEY2, CACNG4, GNAO1, NKX2-5, DES, PLN, CASQ2	12	geneontology_Biological_Process	0.05	Down
GO:0048880	sensory system development	14/240	394/18866	0.00055	0.0353	0.0302	CACNA1C, TUB, SALL2, MEIS2, DCX, PTN, SMOC1, EPHB1, MEIS1, PBX1, TMOD1, MYH10, PROM1, LHX2	14	geneontology_Biological_Process	0.0583333	Down
GO:0099565	chemical synaptic transmission, postsynaptic	7/240	112/18866	0.000577	0.0358	0.0306	MPP2, TMEM25, RIMS2, GRIK5, IGSF9B, TMEM108, CBLN1	7	geneontology_Biological_Process	0.0291667	Down
GO:0048863	stem cell differentiation	11/240	264/18866	0.000591	0.0358	0.0306	FGFR2, RBM24, SEMA6A, PTN, EDNRA, BCHE, MYOCD, LMO1, HAND2, NRTN, NKX2-5	11	geneontology_Biological_Process	0.0458333	Down
GO:0019935	cyclic-nucleotide-mediated signaling	10/240	224/18866	0.000614	0.0358	0.0306	ADGRL1, ADGRB2, RIMS2, MRAP2, ADCY5, PDE3A, RASD2, APLP1, RAMP1, PLN	10	geneontology_Biological_Process	0.0416667	Down
GO:0048638	regulation of developmental growth	13/240	353/18866	0.00062	0.0358	0.0306	FGFR2, SEMA6A, RIMS2, RTN4R, MEIS1, CXADR, HEY2, NRK, AR, OSTN, NKX2-5, PLXNA4, NTN1	13	geneontology_Biological_Process	0.0541667	Down
GO:0061337	cardiac conduction	8/240	148/18866	0.000624	0.0358	0.0306	CACNA1C, ITPR1, KCNH2, CXADR, CACNG4, NKX2-5, PLN, CASQ2	8	geneontology_Biological_Process	0.0333333	Down
GO:0014855	striated muscle cell proliferation	6/240	83/18866	0.000664	0.0367	0.0314	FGFR2, EPHB1, MEIS1, CXADR, HEY2, NKX2-5	6	geneontology_Biological_Process	0.025	Down
GO:0007512	adult heart development	3/240	14/18866	0.000667	0.0367	0.0314	MYH10, HAND2, NKX2-5	3	geneontology_Biological_Process	0.0125	Down
GO:0071295	cellular response to vitamin	4/240	32/18866	0.000694	0.0374	0.032	BRIP1, KANK2, PTN, TNC	4	geneontology_Biological_Process	0.0166667	Down
GO:0050804	modulation of chemical synaptic transmission	15/240	454/18866	0.000744	0.039	0.0333	MPP2, TMEM25, CNIH2, RIMS2, RIMS3, PTN, GRIK5, IGSF9B, EPHB1, SNAP25, BCHE, TMEM108, CACNG4, CBLN1, NPTX2	15	geneontology_Biological_Process	0.0625	Down
GO:0099177	regulation of trans-synaptic signaling	15/240	455/18866	0.00076	0.039	0.0333	MPP2, TMEM25, CNIH2, RIMS2, RIMS3, PTN, GRIK5, IGSF9B, EPHB1, SNAP25, BCHE, TMEM108, CACNG4, CBLN1, NPTX2	15	geneontology_Biological_Process	0.0625	Down
GO:0048738	cardiac muscle tissue development	10/240	231/18866	0.000778	0.039	0.0333	FGFR2, MEIS1, CXADR, HEY2, MYH10, MYOCD, NKX2-5, MYH11, JPH2, PLN	10	geneontology_Biological_Process	0.0416667	Down
GO:0097120	receptor localization to synapse	5/240	57/18866	0.000781	0.039	0.0333	CNIH2, ADAM22, MAPK10, SNAP25, CACNG4	5	geneontology_Biological_Process	0.0208333	Down
GO:0007188	adenylate cyclase-modulating G protein-coupled receptor signaling pathway	10/240	233/18866	0.000831	0.0407	0.0348	ADGRL1, ADGRB2, GNAZ, MRAP2, ADCY5, EDNRA, APLP1, GNAO1, RAMP1, PLN	10	geneontology_Biological_Process	0.0416667	Down
GO:0098742	cell-cell adhesion via plasma-membrane adhesion molecules	11/240	277/18866	0.000877	0.0419	0.0358	ADGRL1, FAT3, PALLD, UNC5D, IGSF9B, PTPRF, CXADR, CDH3, PCDH10, LRRC4B, CBLN1	11	geneontology_Biological_Process	0.0458333	Down
GO:0031102	neuron projection regeneration	5/240	59/18866	0.000914	0.0419	0.0358	RTN4R, PTN, PTPRF, MATN2, TNC	5	geneontology_Biological_Process	0.0208333	Down
GO:0060043	regulation of cardiac muscle cell proliferation	5/240	59/18866	0.000914	0.0419	0.0358	FGFR2, MEIS1, CXADR, HEY2, NKX2-5	5	geneontology_Biological_Process	0.0208333	Down
GO:0060560	developmental growth involved in morphogenesis	10/240	236/18866	0.000916	0.0419	0.0358	FGFR2, SEMA6A, RIMS2, RTN4R, TMEM108, LHX2, OSTN, PLXNA4, NTN1, TNC	10	geneontology_Biological_Process	0.0416667	Down
GO:0043292	contractile fiber	20/253	238/19559	4.07e-11	1.32e-08	1.03e-08	CACNA1C, CSRP2, SVIL, PALLD, ACTN1, TMOD1, FBXL22, SYNM, PGM5, NPNT, FBXO32, PPP1R12B, ITGB1BP2, MYH11, JPH2, TPM2, DES, LMOD1, SYNPO2, CASQ2	20	geneontology_Cellular_Component	0.0790514	Down
GO:0030016	myofibril	18/253	227/19559	1.01e-09	1.65e-07	1.28e-07	CACNA1C, CSRP2, SVIL, PALLD, ACTN1, TMOD1, FBXL22, SYNM, PGM5, FBXO32, PPP1R12B, ITGB1BP2, JPH2, TPM2, DES, LMOD1, SYNPO2, CASQ2	18	geneontology_Cellular_Component	0.0711462	Down
GO:0030018	Z disc	13/253	128/19559	1.18e-08	1.03e-06	8.04e-07	CACNA1C, CSRP2, PALLD, ACTN1, FBXL22, PGM5, FBXO32, PPP1R12B, ITGB1BP2, JPH2, DES, SYNPO2, CASQ2	13	geneontology_Cellular_Component	0.0513834	Down
GO:0030017	sarcomere	16/253	207/19559	1.27e-08	1.03e-06	8.04e-07	CACNA1C, CSRP2, PALLD, ACTN1, TMOD1, FBXL22, PGM5, FBXO32, PPP1R12B, ITGB1BP2, JPH2, TPM2, DES, LMOD1, SYNPO2, CASQ2	16	geneontology_Cellular_Component	0.0632411	Down
GO:0031674	I band	13/253	140/19559	3.49e-08	2.27e-06	1.76e-06	CACNA1C, CSRP2, PALLD, ACTN1, FBXL22, PGM5, FBXO32, PPP1R12B, ITGB1BP2, JPH2, DES, SYNPO2, CASQ2	13	geneontology_Cellular_Component	0.0513834	Down
GO:0062023	collagen-containing extracellular matrix	20/253	427/19559	8.03e-07	4.19e-05	3.26e-05	ADAM11, FGFR2, COL4A5, SBSPON, NAV2, EMILIN3, PTN, LEFTY2, SMOC1, COL4A6, NCAM1, MYOC, MATN2, NPNT, APLP1, ACAN, OGN, NTN1, CBLN1, TNC	20	geneontology_Cellular_Component	0.0790514	Down
GO:0005604	basement membrane	10/253	103/19559	9.02e-07	4.19e-05	3.26e-05	COL4A5, PTN, SMOC1, COL4A6, MATN2, NPNT, APLP1, ACAN, NTN1, TNC	10	geneontology_Cellular_Component	0.0395257	Down
GO:0001725	stress fiber	7/253	68/19559	2.76e-05	0.000997	0.000775	PALLD, SORBS1, ACTN1, MYH10, PGM5, MYLK, SYNPO2	7	geneontology_Cellular_Component	0.027668	Down
GO:0097517	contractile actin filament bundle	7/253	68/19559	2.76e-05	0.000997	0.000775	PALLD, SORBS1, ACTN1, MYH10, PGM5, MYLK, SYNPO2	7	geneontology_Cellular_Component	0.027668	Down
GO:0031594	neuromuscular junction	7/253	76/19559	5.7e-05	0.00168	0.00131	COL4A5, PDZRN3, CIB2, SV2A, PTN, MYH10, DES	7	geneontology_Cellular_Component	0.027668	Down
GO:0032432	actin filament bundle	7/253	76/19559	5.7e-05	0.00168	0.00131	PALLD, SORBS1, ACTN1, MYH10, PGM5, MYLK, SYNPO2	7	geneontology_Cellular_Component	0.027668	Down
GO:0042383	sarcolemma	9/253	135/19559	6.67e-05	0.0018	0.0014	CACNA1C, CIB2, SLMAP, SYNM, PGM5, CACNG4, STAC2, DES, SGCA	9	geneontology_Cellular_Component	0.0355731	Down
GO:0042641	actomyosin	7/253	79/19559	7.32e-05	0.0018	0.0014	PALLD, SORBS1, ACTN1, MYH10, PGM5, MYLK, SYNPO2	7	geneontology_Cellular_Component	0.027668	Down
GO:0098978	glutamatergic synapse	15/253	361/19559	7.75e-05	0.0018	0.0014	CNIH2, ADAM22, SV2A, RTN4R, MAPK10, GRIK5, EPHB1, SNAP25, ACTN1, MYH10, LRRC4B, CACNG4, ACAN, CBLN1, NPTX2	15	geneontology_Cellular_Component	0.0592885	Down
GO:0030863	cortical cytoskeleton	7/253	106/19559	0.000458	0.00953	0.00741	MTSS2, CAP2, RIMS2, CIB2, RIMS3, TMOD1, SHROOM3	7	geneontology_Cellular_Component	0.027668	Down
GO:0014069	postsynaptic density	13/253	337/19559	0.000472	0.00953	0.00741	ADGRL1, MPP2, CACNA1C, CAP2, CNIH2, ITGA8, ADAM22, ITPR1, GRIK5, IGSF9B, LRRC4B, TMEM108, CACNG4	13	geneontology_Cellular_Component	0.0513834	Down
GO:0099061	integral component of postsynaptic density membrane	5/253	51/19559	0.000503	0.00953	0.00741	CNIH2, ADAM22, GRIK5, LRRC4B, CACNG4	5	geneontology_Cellular_Component	0.0197628	Down
GO:0097060	synaptic membrane	14/253	387/19559	0.000547	0.00953	0.00741	ADGRL1, CACNA1C, CNIH2, ITGA8, ADAM22, RIMS2, RIMS3, GRIK5, IGSF9B, SNAP25, GABBR2, LRRC4B, CACNG4, CBLN1	14	geneontology_Cellular_Component	0.055336	Down
GO:0032279	asymmetric synapse	13/253	343/19559	0.000557	0.00953	0.00741	ADGRL1, MPP2, CACNA1C, CAP2, CNIH2, ITGA8, ADAM22, ITPR1, GRIK5, IGSF9B, LRRC4B, TMEM108, CACNG4	13	geneontology_Cellular_Component	0.0513834	Down
GO:0034703	cation channel complex	10/253	221/19559	0.000631	0.00997	0.00775	CACNA1C, CNIH2, KCNH2, GRIK5, SNAP25, KCNG1, KCNQ4, CACNG4, KCNMB1, CASQ2	10	geneontology_Cellular_Component	0.0395257	Down
GO:0099146	intrinsic component of postsynaptic density membrane	5/253	54/19559	0.000656	0.00997	0.00775	CNIH2, ADAM22, GRIK5, LRRC4B, CACNG4	5	geneontology_Cellular_Component	0.0197628	Down
GO:0030426	growth cone	9/253	184/19559	0.000675	0.00997	0.00775	ADGRL1, CRMP1, RTN4R, PALLD, CXADR, SNAP25, RAC3, MYH10, CRTAC1	9	geneontology_Cellular_Component	0.0355731	Down
GO:0005884	actin filament	7/253	118/19559	0.000869	0.0116	0.00903	PALLD, RAC3, PAWR, ACTN1, TMOD1, TPM2, LMOD1	7	geneontology_Cellular_Component	0.027668	Down
GO:0030427	site of polarized growth	9/253	191/19559	0.00088	0.0116	0.00903	ADGRL1, CRMP1, RTN4R, PALLD, CXADR, SNAP25, RAC3, MYH10, CRTAC1	9	geneontology_Cellular_Component	0.0355731	Down
GO:0099572	postsynaptic specialization	13/253	361/19559	0.000894	0.0116	0.00903	ADGRL1, MPP2, CACNA1C, CAP2, CNIH2, ITGA8, ADAM22, ITPR1, GRIK5, IGSF9B, LRRC4B, TMEM108, CACNG4	13	geneontology_Cellular_Component	0.0513834	Down
GO:0043204	perikaryon	8/253	156/19559	0.000983	0.0123	0.00955	CACNA1C, CTSV, ITGA8, PRPH, CRMP1, RTN4R, MAPK10, GRIK5	8	geneontology_Cellular_Component	0.0316206	Down
GO:1902495	transmembrane transporter complex	12/253	322/19559	0.00104	0.0123	0.0096	CACNA1C, CNIH2, KCNH2, GRIK5, SNAP25, KCNG1, ANO1, KCNQ4, CACNG4, KCNMB1, PLN, CASQ2	12	geneontology_Cellular_Component	0.0474308	Down
GO:0098984	neuron to neuron synapse	13/253	368/19559	0.00106	0.0123	0.0096	ADGRL1, MPP2, CACNA1C, CAP2, CNIH2, ITGA8, ADAM22, ITPR1, GRIK5, IGSF9B, LRRC4B, TMEM108, CACNG4	13	geneontology_Cellular_Component	0.0513834	Down
GO:0098839	postsynaptic density membrane	6/253	92/19559	0.00124	0.0139	0.0108	CACNA1C, CNIH2, ADAM22, GRIK5, LRRC4B, CACNG4	6	geneontology_Cellular_Component	0.0237154	Down
GO:1990351	transporter complex	12/253	330/19559	0.00129	0.0139	0.0108	CACNA1C, CNIH2, KCNH2, GRIK5, SNAP25, KCNG1, ANO1, KCNQ4, CACNG4, KCNMB1, PLN, CASQ2	12	geneontology_Cellular_Component	0.0474308	Down
GO:0034705	potassium channel complex	6/253	96/19559	0.00155	0.0163	0.0126	KCNH2, GRIK5, SNAP25, KCNG1, KCNQ4, KCNMB1	6	geneontology_Cellular_Component	0.0237154	Down
GO:0043034	costamere	3/253	19/19559	0.00178	0.0181	0.014	SVIL, SYNM, PGM5	3	geneontology_Cellular_Component	0.0118577	Down
GO:0034702	ion channel complex	11/253	299/19559	0.00185	0.0182	0.0142	CACNA1C, CNIH2, KCNH2, GRIK5, SNAP25, KCNG1, ANO1, KCNQ4, CACNG4, KCNMB1, CASQ2	11	geneontology_Cellular_Component	0.0434783	Down
GO:0005938	cell cortex	11/253	305/19559	0.00216	0.0207	0.0161	MTSS2, FGFR2, CAP2, RIMS2, CIB2, RIMS3, SEPTIN3, RAC3, TMOD1, MYH10, SHROOM3	11	geneontology_Cellular_Component	0.0434783	Down
GO:0099060	integral component of postsynaptic specialization membrane	5/253	74/19559	0.00271	0.0241	0.0187	CNIH2, ADAM22, GRIK5, LRRC4B, CACNG4	5	geneontology_Cellular_Component	0.0197628	Down
GO:0005865	striated muscle thin filament	3/253	22/19559	0.00275	0.0241	0.0187	TMOD1, TPM2, LMOD1	3	geneontology_Cellular_Component	0.0118577	Down
GO:0032982	myosin filament	3/253	22/19559	0.00275	0.0241	0.0187	MYH10, MYH11, ACTG2	3	geneontology_Cellular_Component	0.0118577	Down
GO:0098948	intrinsic component of postsynaptic specialization membrane	5/253	77/19559	0.00323	0.0276	0.0214	CNIH2, ADAM22, GRIK5, LRRC4B, CACNG4	5	geneontology_Cellular_Component	0.0197628	Down
GO:0014704	intercalated disc	4/253	51/19559	0.00424	0.0354	0.0275	CXADR, ACTN1, PGM5, DES	4	geneontology_Cellular_Component	0.0158103	Down
GO:0099634	postsynaptic specialization membrane	6/253	118/19559	0.00436	0.0354	0.0275	CACNA1C, CNIH2, ADAM22, GRIK5, LRRC4B, CACNG4	6	geneontology_Cellular_Component	0.0237154	Down
GO:0036379	myofilament	3/253	26/19559	0.00446	0.0354	0.0275	TMOD1, TPM2, LMOD1	3	geneontology_Cellular_Component	0.0118577	Down
GO:0008076	voltage-gated potassium channel complex	5/253	88/19559	0.00571	0.0441	0.0343	KCNH2, SNAP25, KCNG1, KCNQ4, KCNMB1	5	geneontology_Cellular_Component	0.0197628	Down
GO:0005912	adherens junction	7/253	166/19559	0.00594	0.0449	0.0349	MPP7, CXADR, SORBS1, SHROOM3, CDH3, SYNM, PGM5	7	geneontology_Cellular_Component	0.027668	Down
GO:0003779	actin binding	18/247	437/18352	2.8e-05	0.0124	0.0116	MTSS2, CAP2, TMSB15A, SVIL, PALLD, SORBS1, PAWR, ACTN1, TMOD1, MYH10, SHROOM3, MYLK, MYH11, CNN1, TPM2, LMOD1, SYNPO2, TAGLN	18	geneontology_Molecular_Function	0.0728745	Down
GO:0042805	actinin binding	5/247	36/18352	0.000114	0.0251	0.0235	CACNA1C, CSRP2, PALLD, PROM1, SYNPO2	5	geneontology_Molecular_Function	0.0202429	Down
KEGG, Kyoto Encyclopedia of Genes and Genomes; GO, Gene Ontology; TCGA, The Cancer Genome Atlas; FDR, false discovery rate.
